# Supplementary material for: Extreme genome scrambling in marine planktonic Oikopleura dioica cryptic species
Source: Genome Res. 2024 Mar;34(3):426–40. doi: 10.1101/gr.278295.123 (PMC11067885; doi:10.1101/gr.278295.123)
Supplement: Supplement 2 [file Supplemental_Table_S2.xlsx]

## Sheet: Supplemental Table S2
	Iterative purging of remaining halpotypes in the Bar2 assemblies.
Flye logs	No purge	1st purge	2nd purge	3rd purge	4th purge	5th purge	6th purge	7th purge
Total length	62728188	56784973	56015091	55775962	55793181	55780400	55500264	55477876
Fragments	267	90	87	67	68	68	57	63
Fragments N50	3805044	5285831	5916621	7929108	5350954	6437774	6438728	6396162
Largest frg	12033511	12028441	12031956	12028217	12091826	12028553	12090713	12035616
Scaffolds	2	1	1	2	1	1	1	2
Mean coverage	112	120	121	122	122	122	122	123
BUSCO logs
Complete BUSCOs (C)	462	468	473	476	465	475	476	466
Complete and single-copy BUSCOs (S)	422	452	465	467	457	470	468	457
Complete and duplicated BUSCOs (D)	40	16	8	9	8	5	8	9
Fragmented BUSCOs (F)	101	101	97	91	104	95	88	99
Missing BUSCOs (M)	391	385	384	387	385	384	390	389
Total BUSCO groups searched	954	954	954	954	954	954	954	954
BUSCO logs after purge_dups
Complete BUSCOs (C)	465	467	473	473	464	471	475	465
Complete and single-copy BUSCOs (S)	459	460	466	467	458	468	469	458
Complete and duplicated BUSCOs (D)	6	7	7	6	6	3	6	7
Fragmented BUSCOs (F)	100	101	99	94	106	100	90	100
Missing BUSCOs (M)	389	386	382	387	384	383	389	389		Below: alternative assemblers
Total BUSCO groups searched	954	954	954	954	954	954	954	954		(latest release as of March 2021)
Bandage info										Shasta	Raven
Node count	547	175	159	127	118	119	109	126		1149	99
Edge count	145	86	84	62	79	67	69	89		1198	31
Smallest edge overlap (bp)	0	0	0	0	0	0	0	0		0	0
Largest edge overlap (bp)	0	0	0	0	0	0	0	0		30	86184
Total length (bp)	74187871	57054996	56283174	58510174	55797234	55750889	58005401	57943805		67893398	58522165
Total length no overlaps (bp)	74187871	57054996	56283174	58510174	55797234	55750889	58005401	57943805		67883791	57409359
Dead ends	878	231	206	166	145	145	128	145		553	146
Percentage dead ends	0.802559	0.66	0.647799	0.653543	0.614407	0.609244	0.587156	0.575397		0.240644	0.737374
Connected components	450	120	112	89	78	78	68	80		269	74
Largest component (bp)	36683561	29735495	17355105	17399239	17348078	17355724	17317284	17347484		47621352	11464679
Total length orphaned nodes (bp)	36683561	29735495	17355105	17399239	17348078	17355724	17317284	17347484		47621352	11464679
N50 (bp)	3805044	5278209	5902038	6436473	5333559	6437774	6438728	6396162		218444	2549420
Shortest node (bp)	513	546	555	696	527	545	592	507		12	2076
Lower quartile node (bp)	5210	3765	3233	3790	3231	3229	2741	2928		1217	42345
Median node (bp)	13296	10790	8652	12708	11377	13872	11474	12128		22406	151763
Upper quartile node (bp)	32495	29044	34624	69755	108233	124792	139187	65884		46511	489693
Longest node (bp)	12028597	12028435	12024530	12024230	12023240	12028553	12023038	12023205		12095784	11464679
Median depth	84	114	107	108	114	114	107	106		44.0958	0.000118364
Estimated sequence length (bp)	108895100	58975067	59053081	62852589	57348465	57509087	56902385	57175377		67396627	59402167
The Flye assemblies are not deterministic. The replicates below illustrate the variability in the results.
	Replicates of the same iteration
	No purge						4th purge
Flye logs	Replicate 1	Replicate 2	Replicate 3	Replicate 4	Replicate 5		Replicate 1	Replicate 2	Replicate 3	Replicate 4	Replicate 5
Total length	62728188	62570903	62821273	62892876	62513528		55793181	55768803	55816726	55790238	55686055
Fragments	267	263	268	279	270		68	62	66	65	64
Fragments N50	3805044	3804769	3805320	3805275	4241397		5350954	5356822	5357414	5351388	5353322
Largest frg	12033511	12033468	12033723	12033444	12033575		12091826	12087752	12087253	12091245	12091631
Scaffolds	2	2	2	2	2		1	2	2	2	2
Mean coverage	112	112	112	112	113		122	122	122	122	122
BUSCO logs
Complete BUSCOs (C)	462	467	464	463	459		465	462	462	462	462
Complete and single-copy BUSCOs (S)	422	425	420	419	422		457	453	453	452	452
Complete and duplicated BUSCOs (D)	40	42	44	44	37		8	9	9	10	10
Fragmented BUSCOs (F)	101	102	101	100	106		104	106	106	107	107
Missing BUSCOs (M)	391	385	389	391	389		385	386	386	385	385
Total BUSCO groups searched	954	954	954	954	954		954	954	954	954	954

## Sheet: README
Iterative purging of remaining haplotypes in the “Bar2” sequencing run.
Extract from the manuscript’s methods section: We extracted high-molecular weight DNA from one individual (“Bar2”) from the Barcelona laboratory strain (Martí-Solans et al. 2015) using a modified salting-out protocol (Masunaga et al. 2022), sequenced it on MinION sequencer Mk1B (Oxford Nanopore Technologies) using a SQK-LSK109 kit (ONT) following the manufacturer’s instructions and basecalled it …
This table displays quality metrics computed by the assembler tool (Flye), the completeness and duplication detection tool (BUSCO) and the assembly graph summarising tool (Bandage), for multiple iterations of the haplotype removal strategy described above. The detailed meaning of each metric is describe in each tool’s user manual.
As the output of the Flye assembler is not deterministic, the table also displays the quality metrics for multiple repetitions of the same iteration step.
