# Supplementary material for: Extreme genome scrambling in marine planktonic Oikopleura dioica cryptic species
Source: HighWire-hosted journal article supplement (doi:10.1101/gr.278295.123), 2024-04-15
Supplement: Supplemental_Data.zip [file operon_scrambling-1.pdf › Supplemental_Data/articles/GenomicFeatures_files/figure-html/operon_scrambling-1.pdf]

genes\_outside\_operons

n = 11688

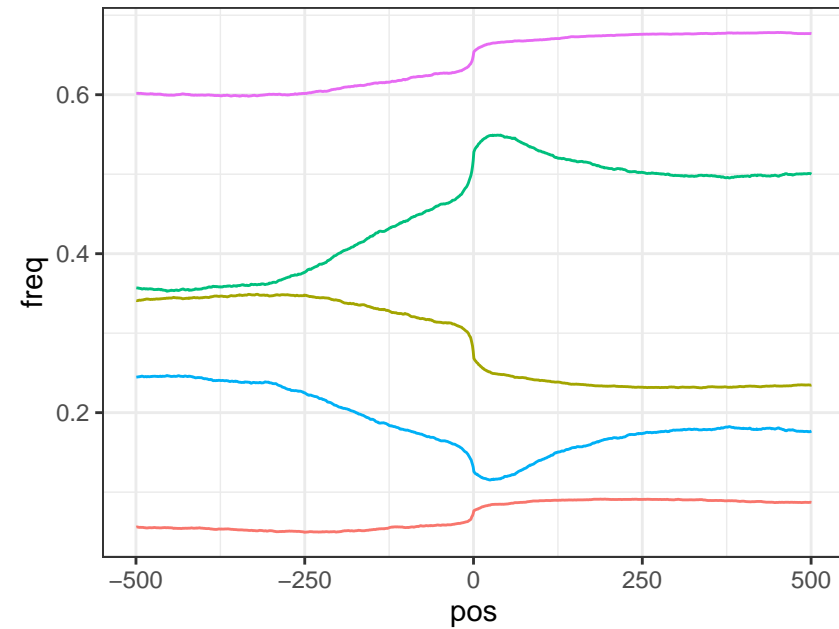

operons

n = 2017

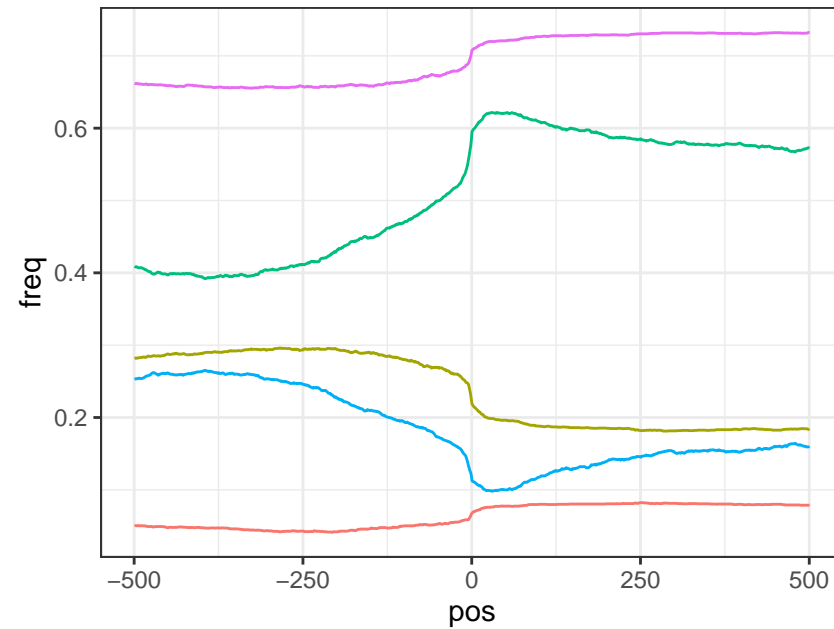

genes\_internal\_to\_operons

n = 1348

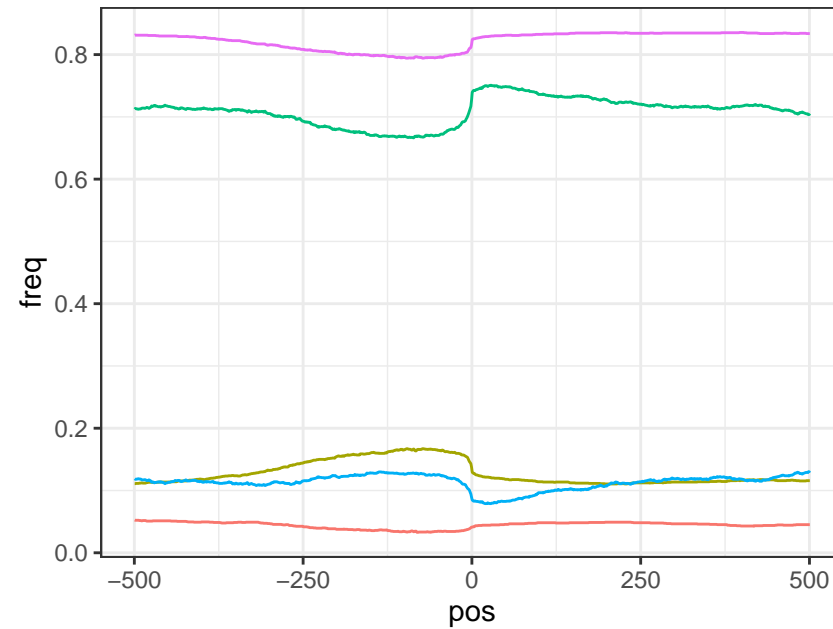

desc

- 01\_isolated
- 02\_unmapped
- 03\_colinear\_aln
- 04\_bridge
- 05\_colinear\_reg

desc

- 01\_isolated
- 02\_unaligned
- 03\_colinear\_aln
- 04\_bridge
- 05\_colinear\_reg
