# Supplementary material for: Extreme genome scrambling in marine planktonic Oikopleura dioica cryptic species
Source: HighWire-hosted journal article supplement (doi:10.1101/gr.278295.123), 2024-04-15

Oki-Kum: synteny block size distri

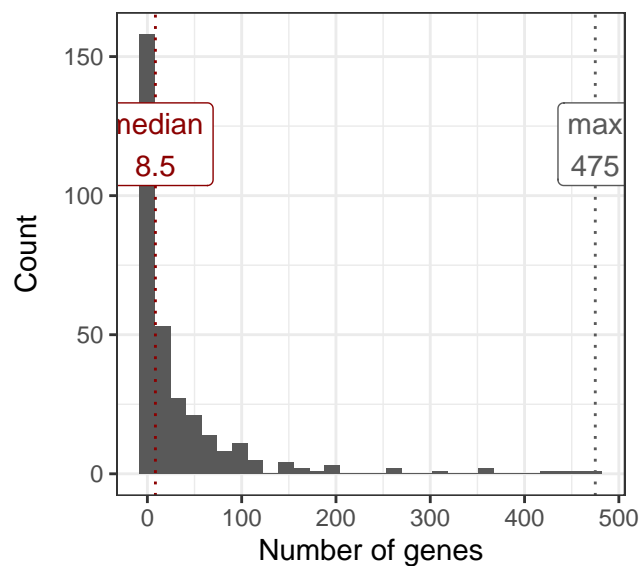

Osa-Aom: synteny block size distri

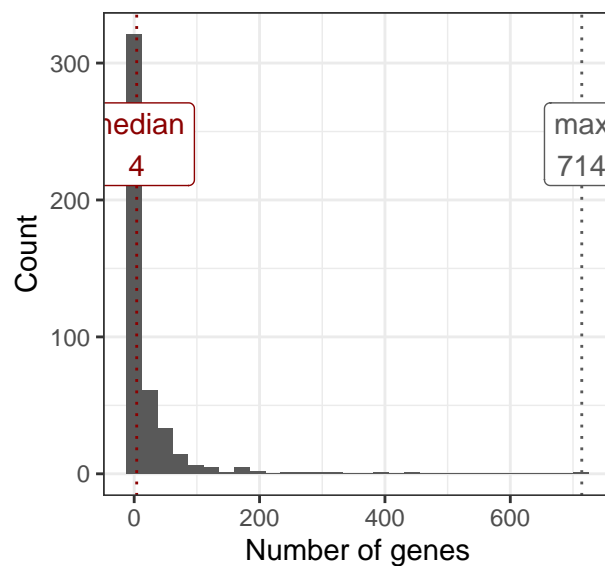

Bar-Nor: synteny block size distrib

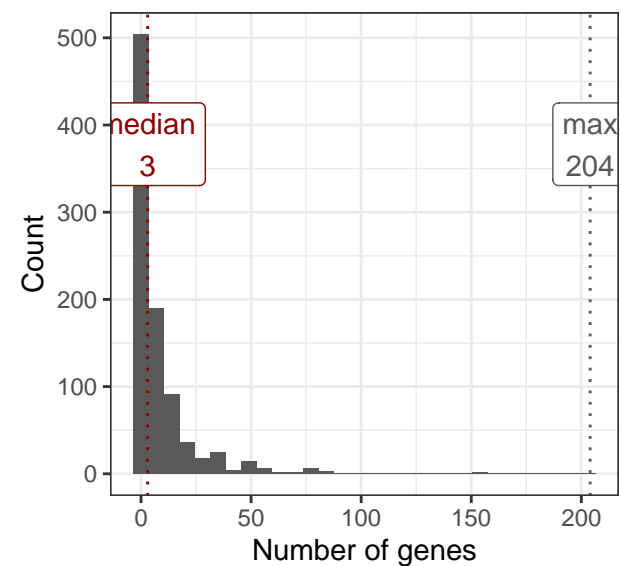

Osa-Bar: synteny block size distri

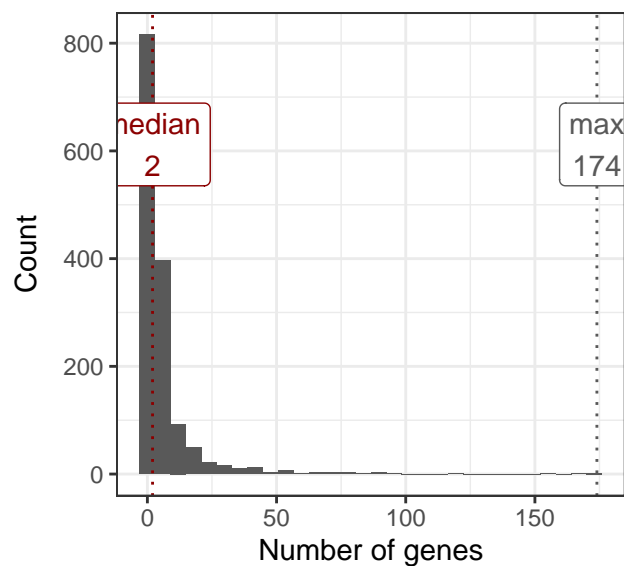

Osa-Nor: synteny block size distri

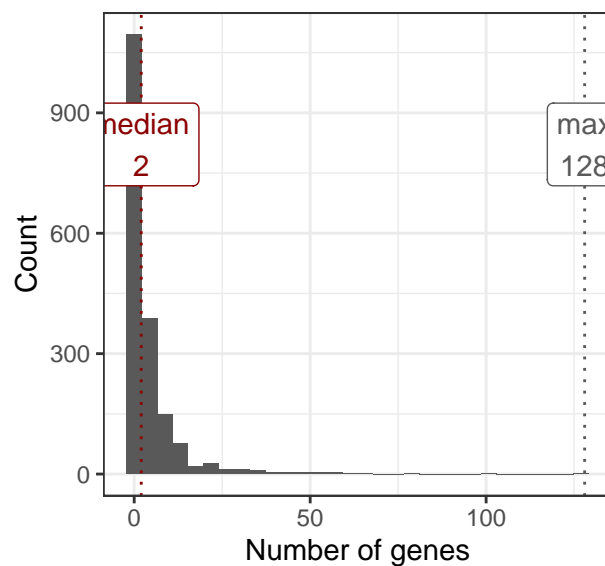

Bar-Aom: synteny block size distrib

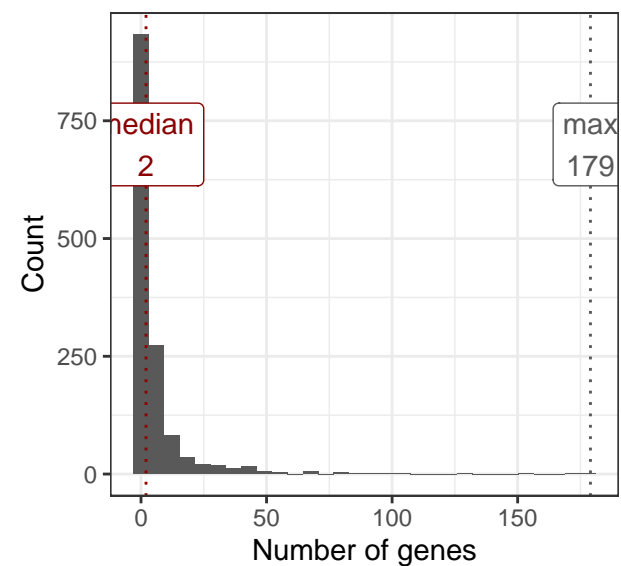

Oki-Osa: synteny block size distri

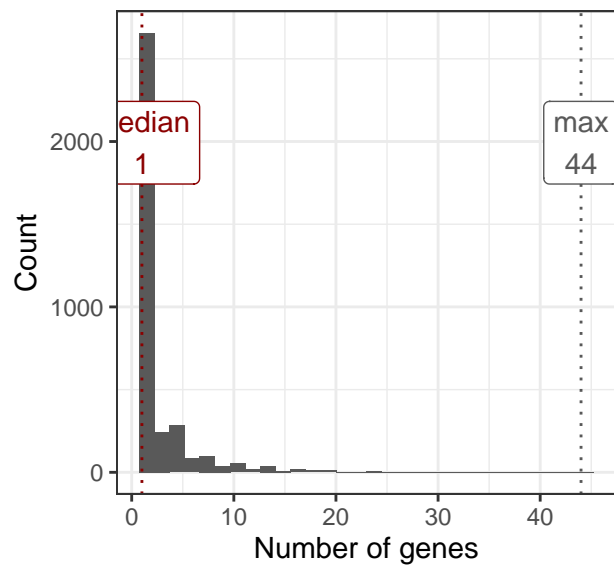

Oki-Bar: synteny block size distri

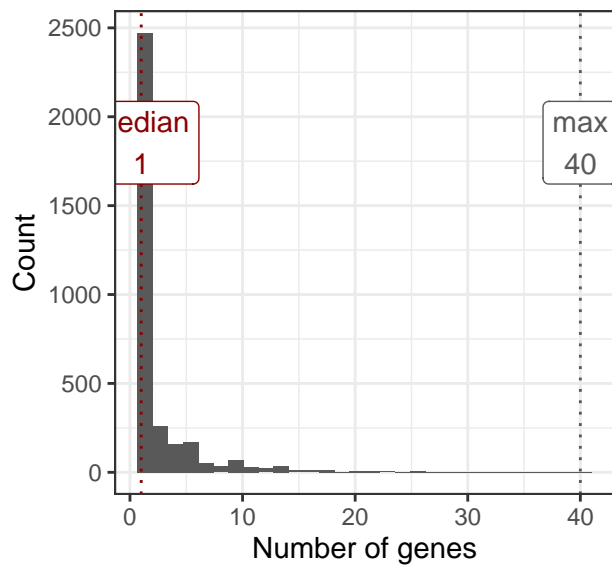

Osa-Kum: synteny block size distri

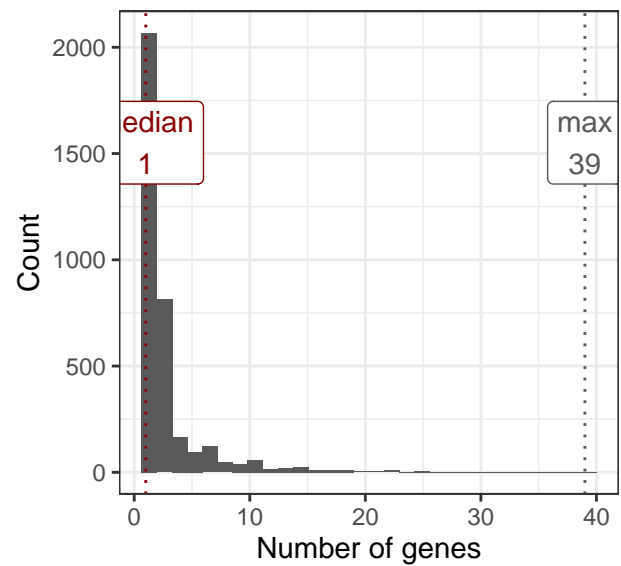

Supplement: Supplemental_Data.zip [file synteny_block_histograms-1.pdf › Supplemental_Data/articles/OrthogroupSyntenies_files/figure-html/synteny_block_histograms-1.pdf]
