# Supplementary figures and images for: Extreme genome scrambling in marine planktonic Oikopleura dioica cryptic species
Source: HighWire-hosted journal article supplement (doi:10.1101/gr.278295.123), 2024-04-15

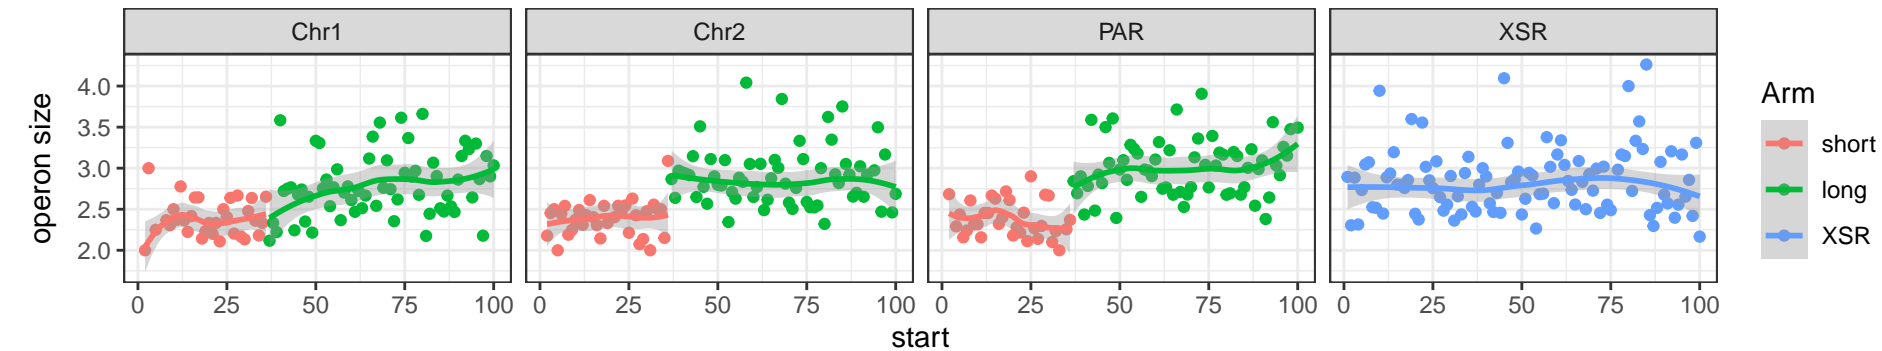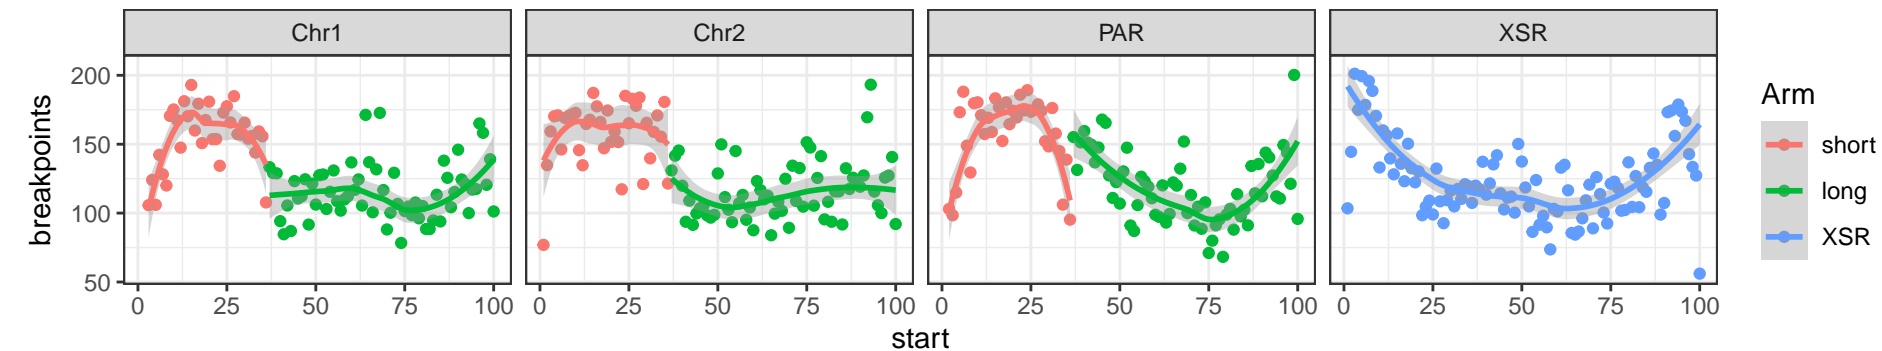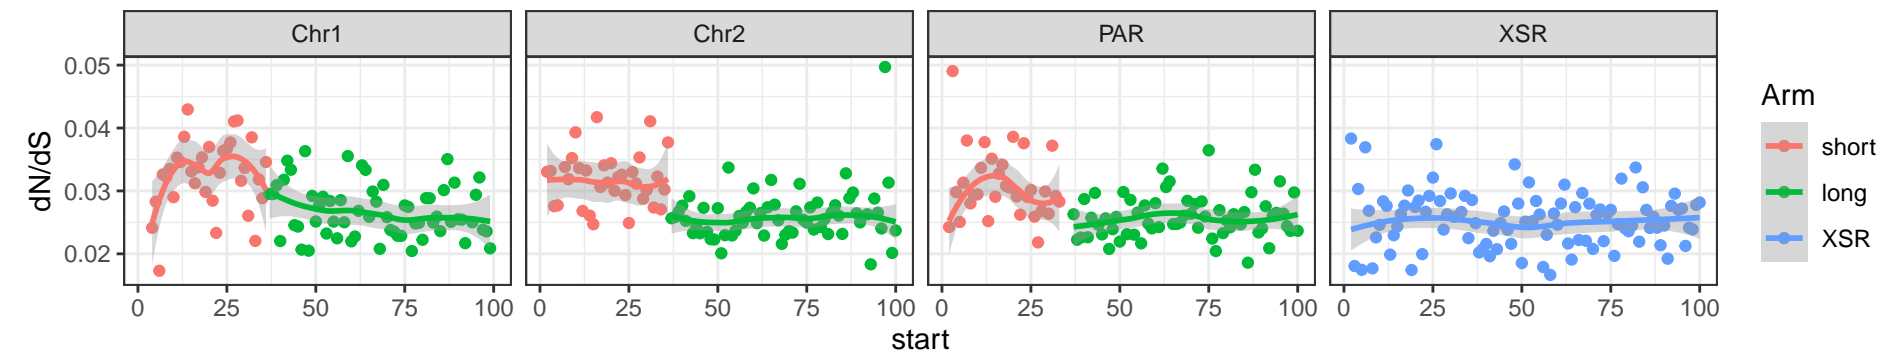

Supplement: Supplemental_Data.zip [file chromosome_plots_tiles_5_2_Fig4A-1.pdf › Supplemental_Data/articles/ChromosomePlots_files/figure-html/chromosome_plots_tiles_5_2_Fig4A-1.pdf]

operon size

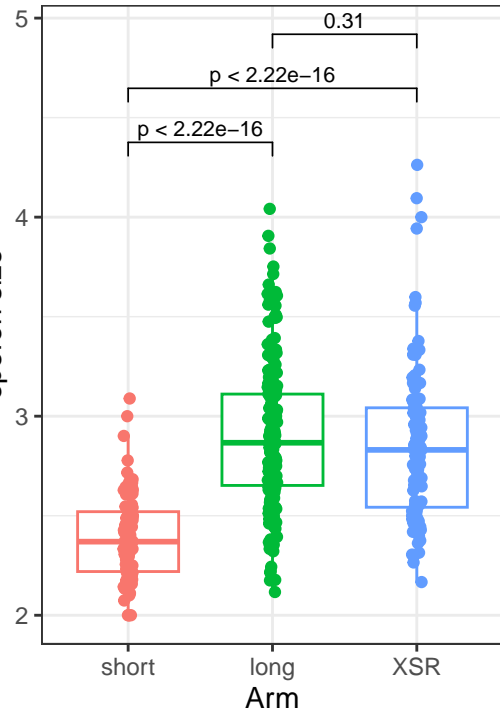

breakpoints

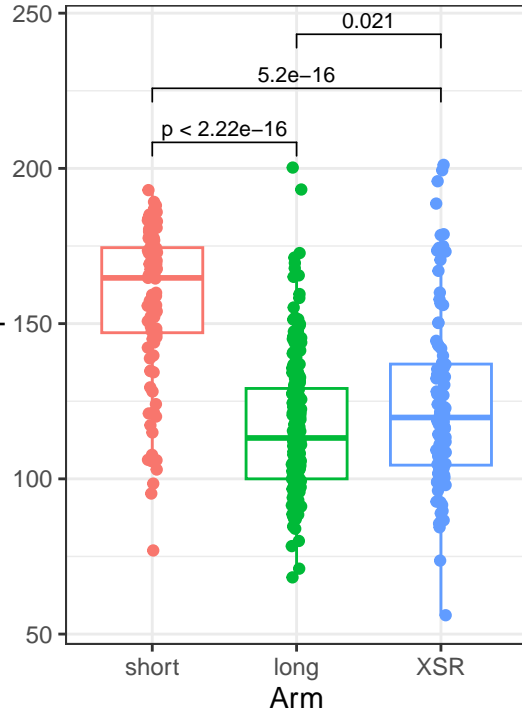

dN/dS

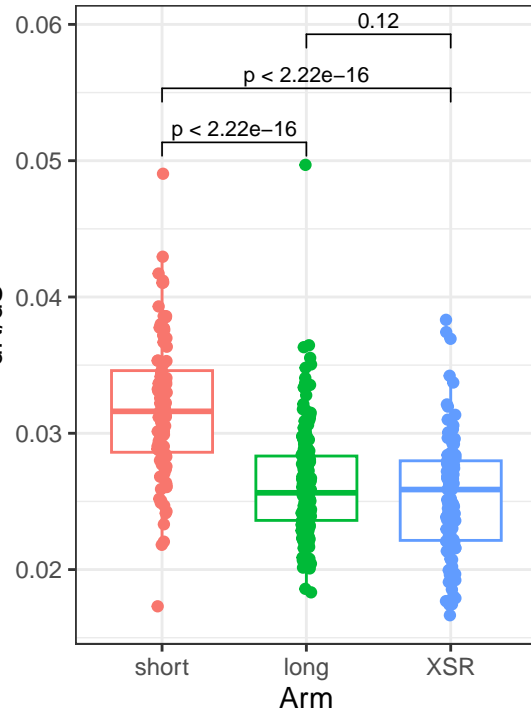

Oki.Arm

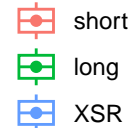

Supplement: Supplemental_Data.zip [file chromosome_plots_tiles_5_2_Fig4B-1.pdf › Supplemental_Data/articles/ChromosomePlots_files/figure-html/chromosome_plots_tiles_5_2_Fig4B-1.pdf]

Aligned on regions left boundary. CNE is 50/48. Okinawa – Osaka

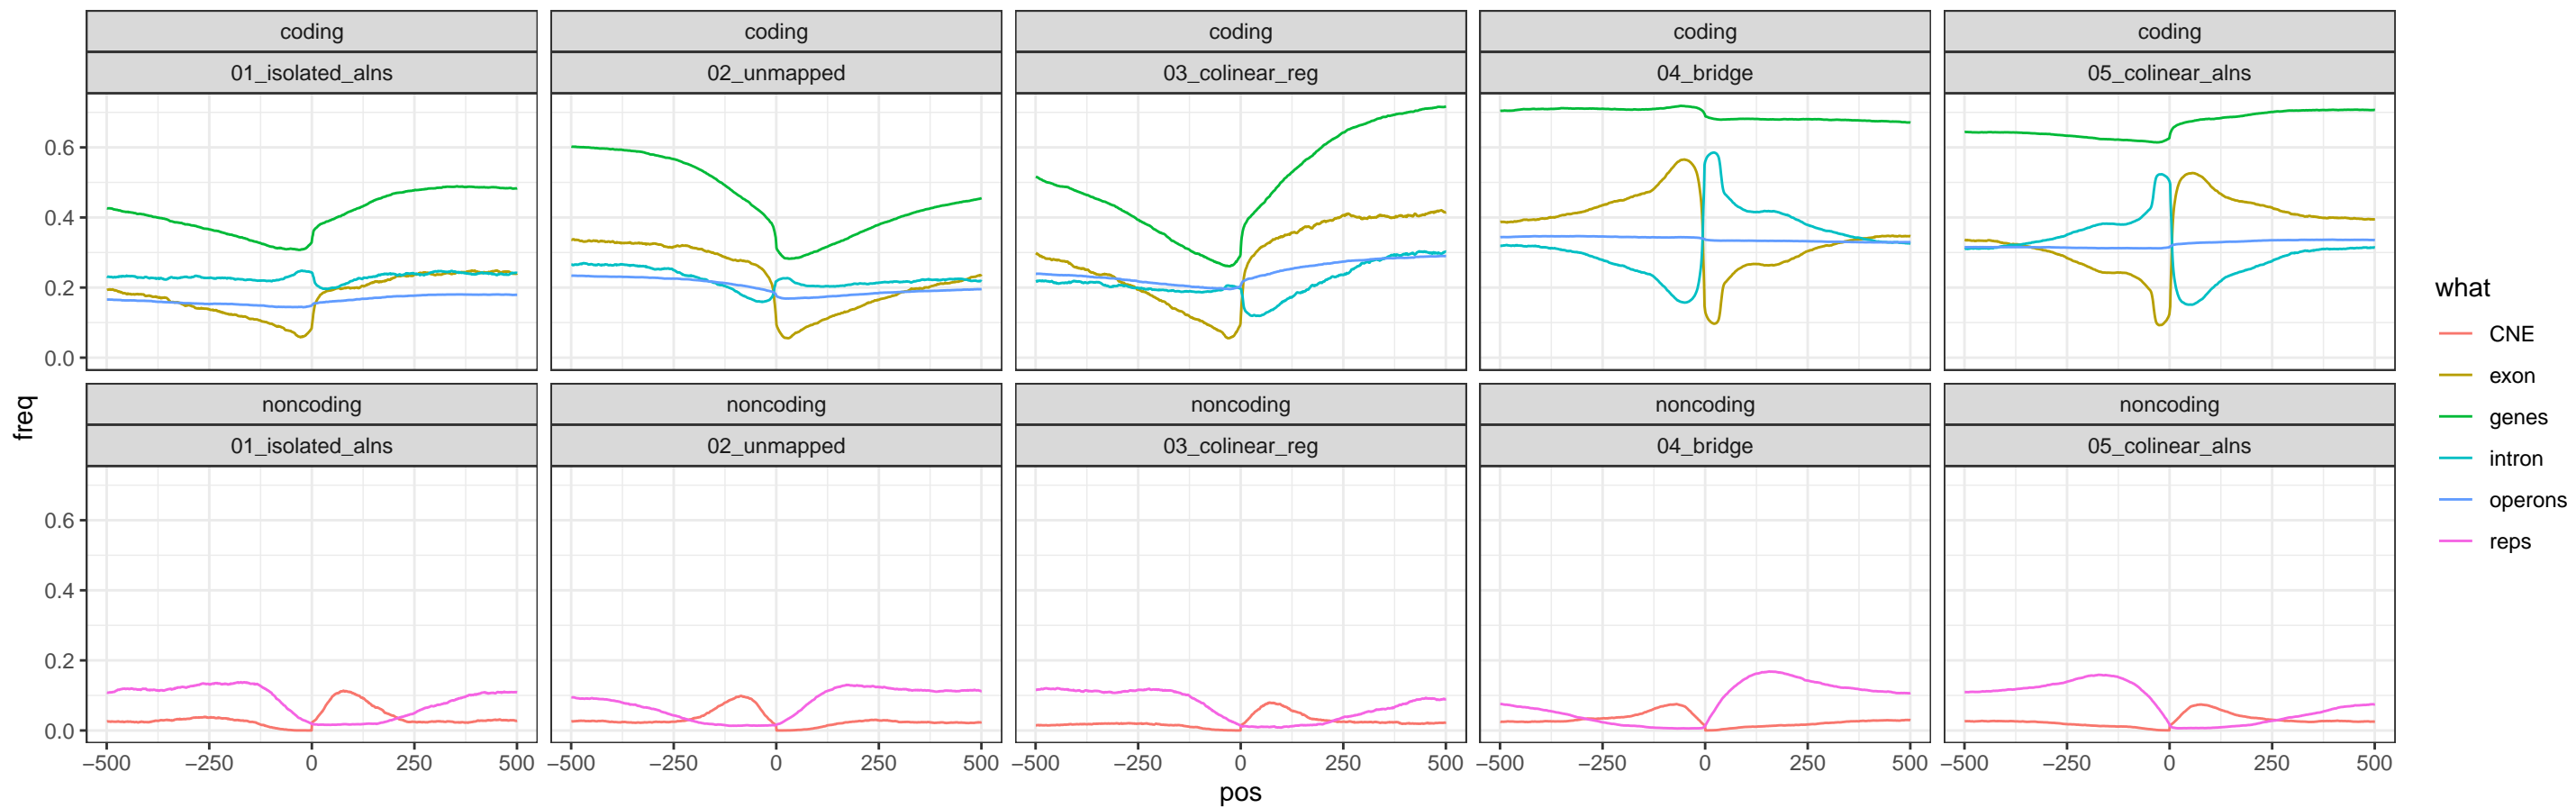

Supplement: Supplemental_Data.zip [file genomic_features_byType-1.pdf › Supplemental_Data/articles/GenomicFeatures_files/figure-html/genomic_features_byType-1.pdf]

Aligned on center of regions. CNE is 50/48. Okinawa – Osaka

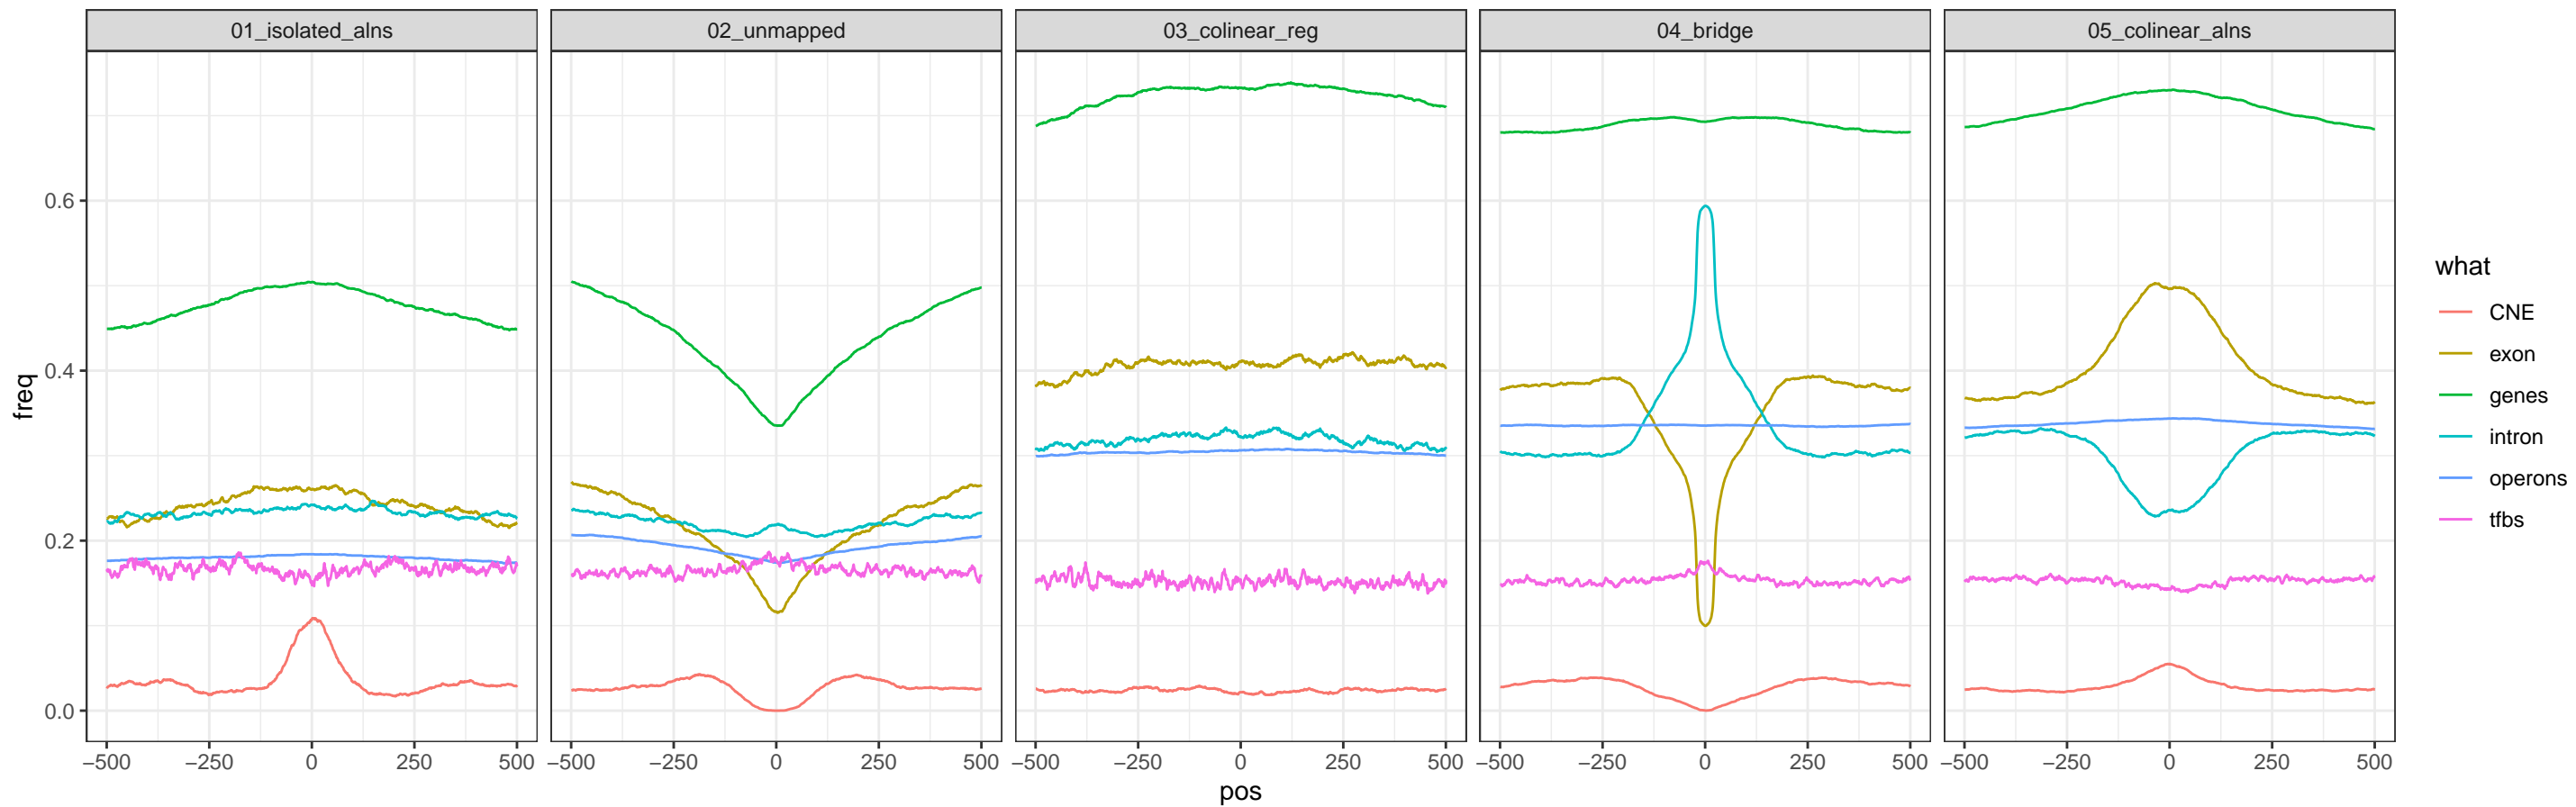

Supplement: Supplemental_Data.zip [file genomic_features_byType.centered-1.pdf › Supplemental_Data/articles/GenomicFeatures_files/figure-html/genomic_features_byType.centered-1.pdf]

# Aligned on regions left boundary. CNE is 50/48. Okinawa – Osaka

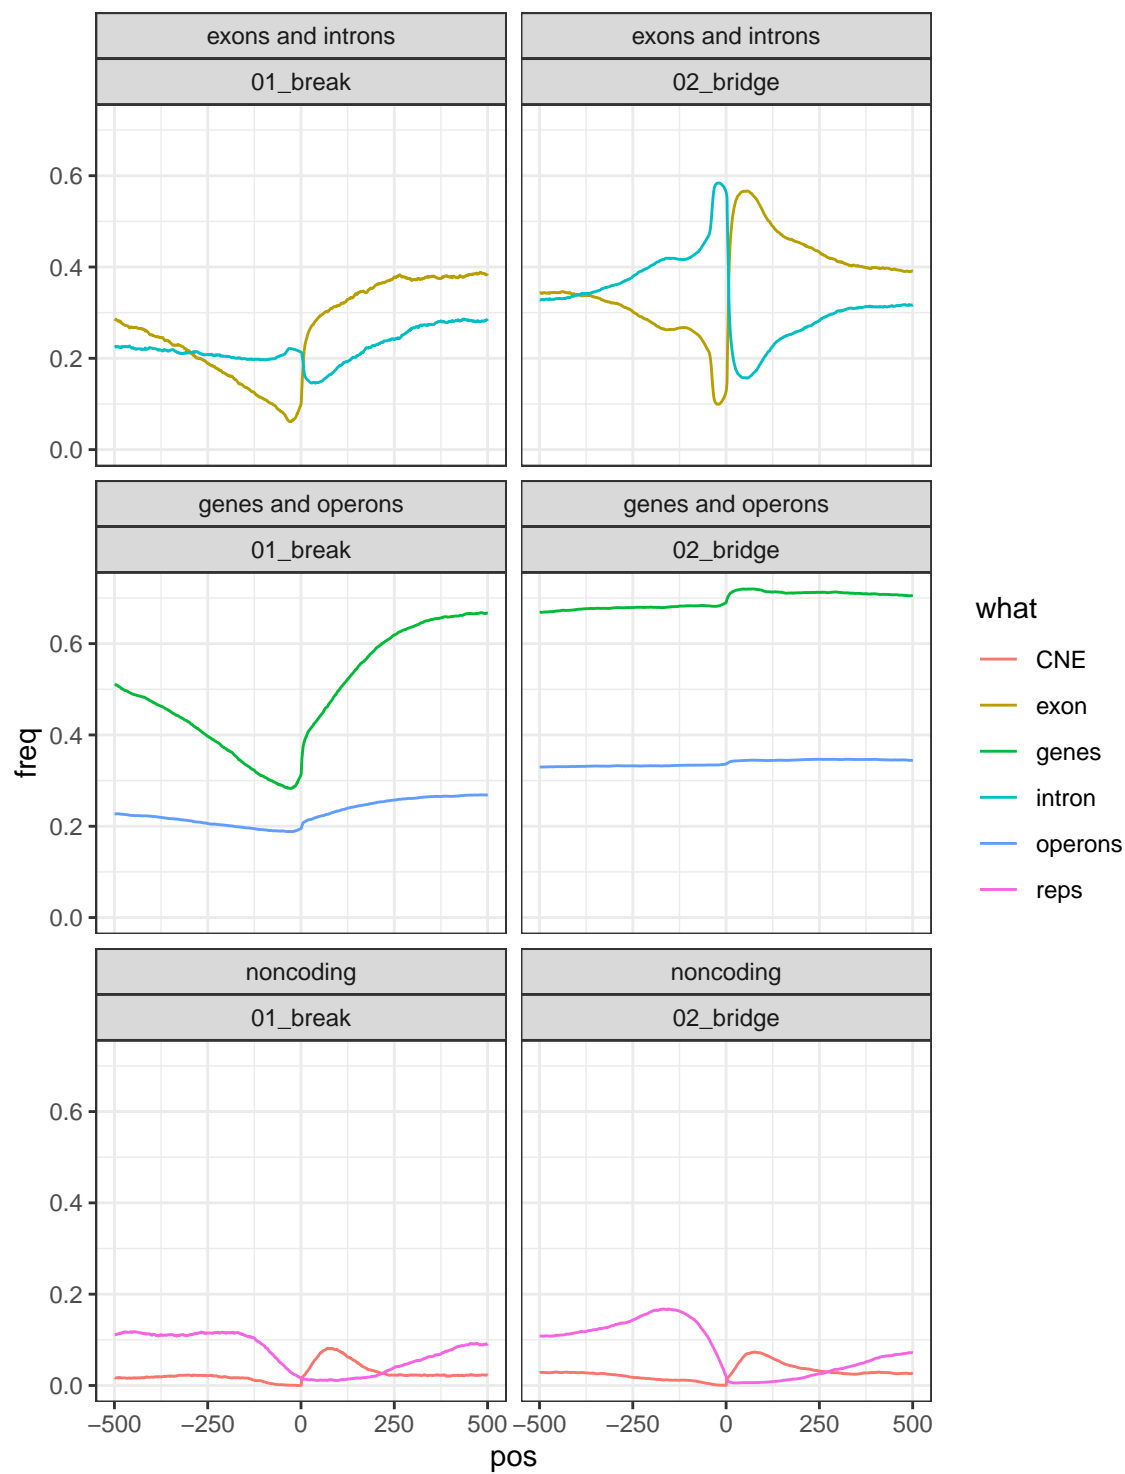

Supplement: Supplemental_Data.zip [file genomic_features_byType_2-1.pdf › Supplemental_Data/articles/GenomicFeatures_files/figure-html/genomic_features_byType_2-1.pdf]

Okinawa – Osaka

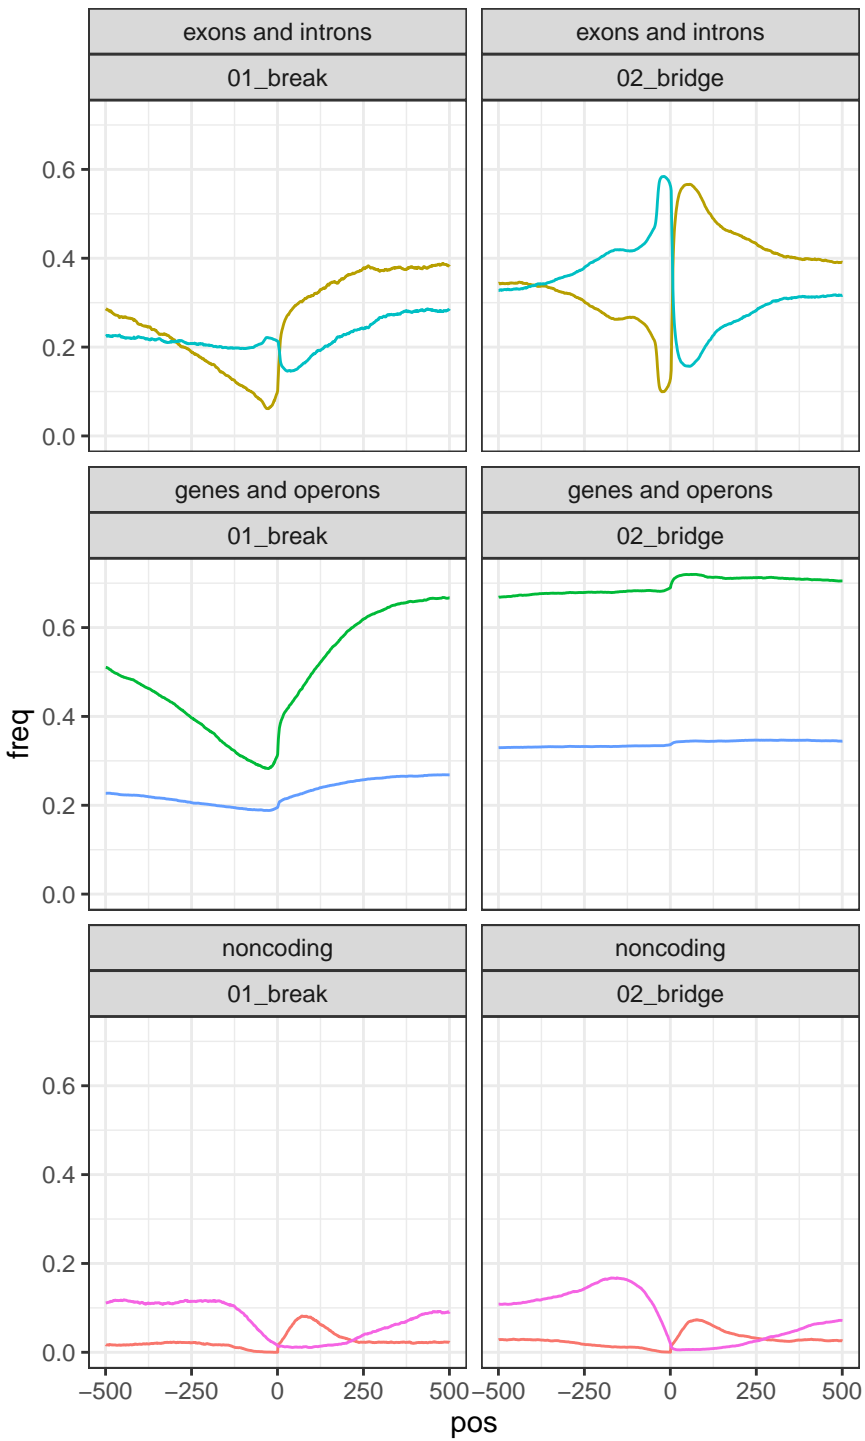

Okinawa – Barcelona

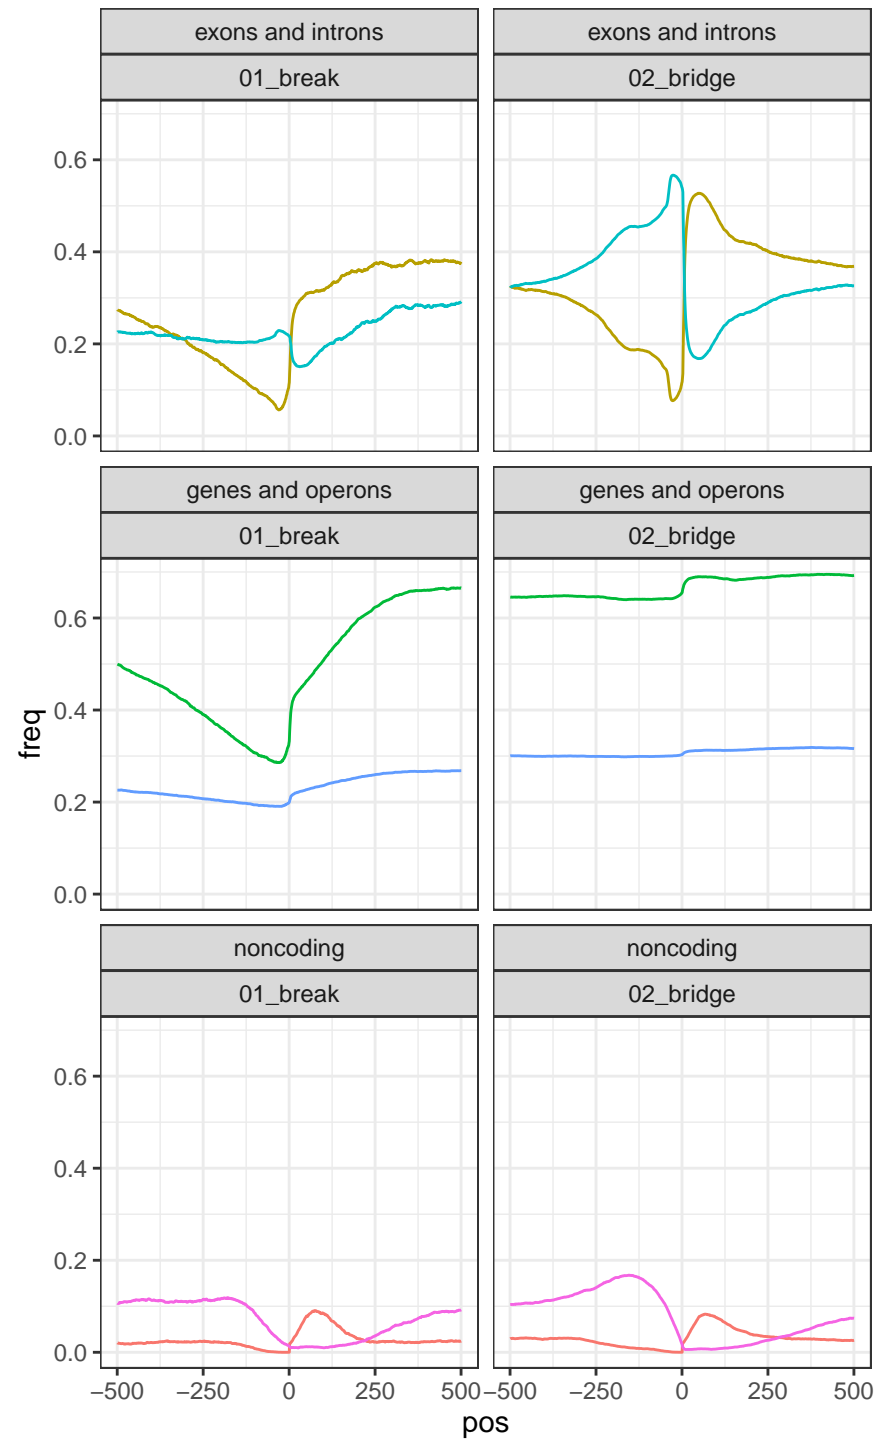

Okinawa – Kum

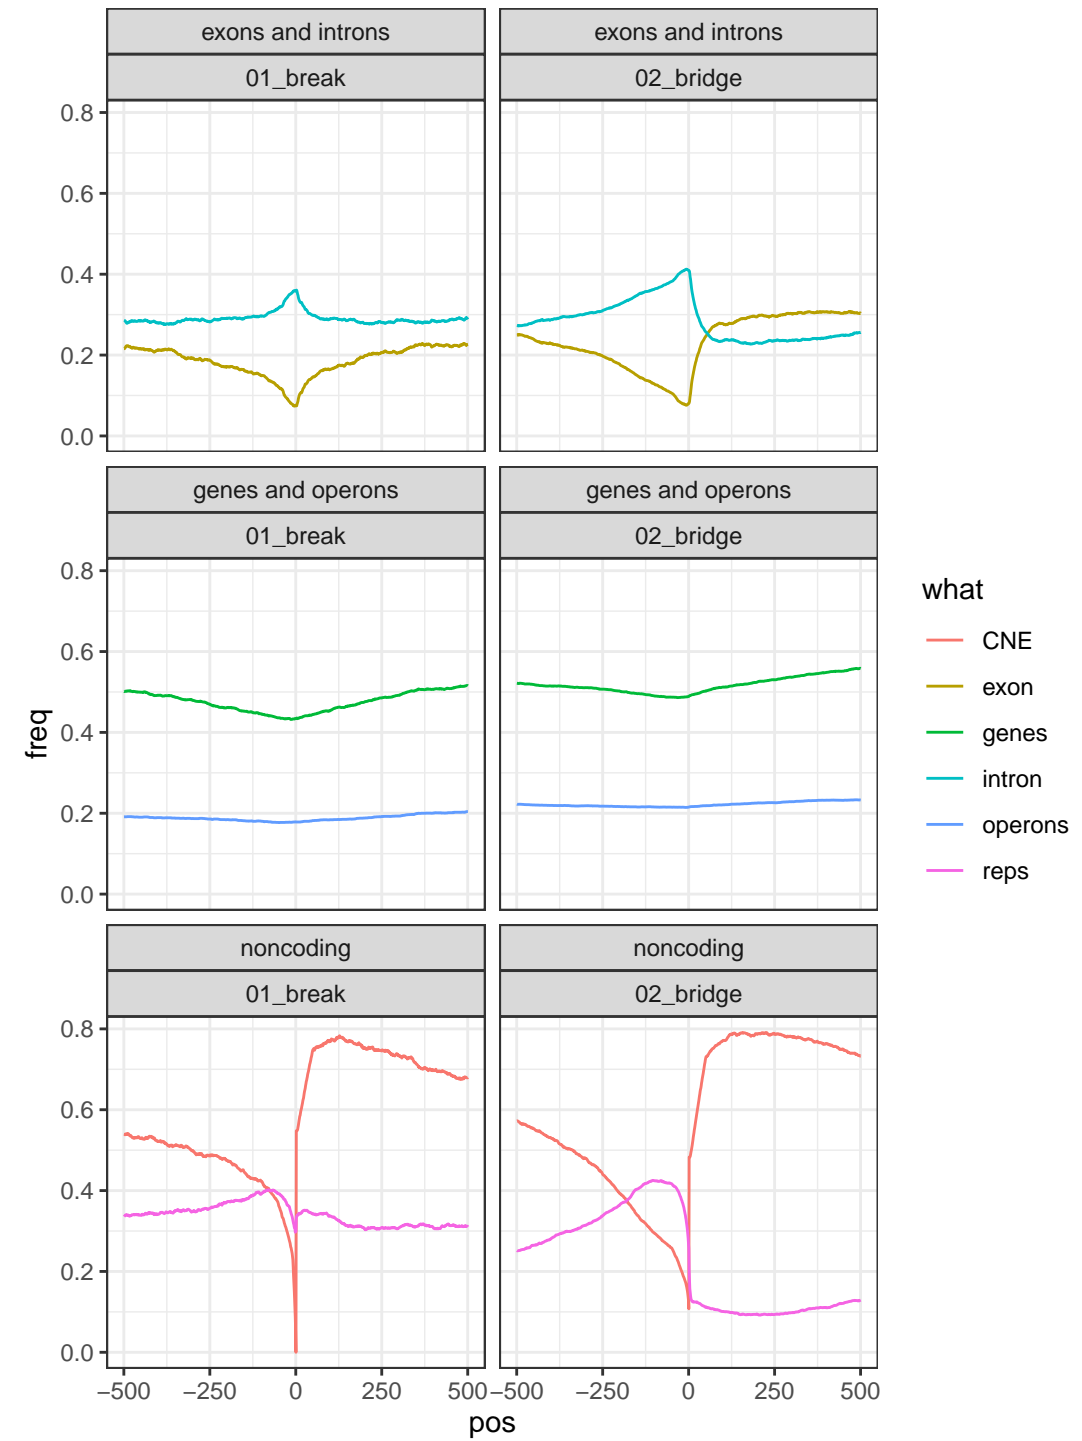

Supplement: Supplemental_Data.zip [file genomic_features_byType_Oki-1.pdf › Supplemental_Data/articles/GenomicFeatures_files/figure-html/genomic_features_byType_Oki-1.pdf]

Osaka – Okinawa

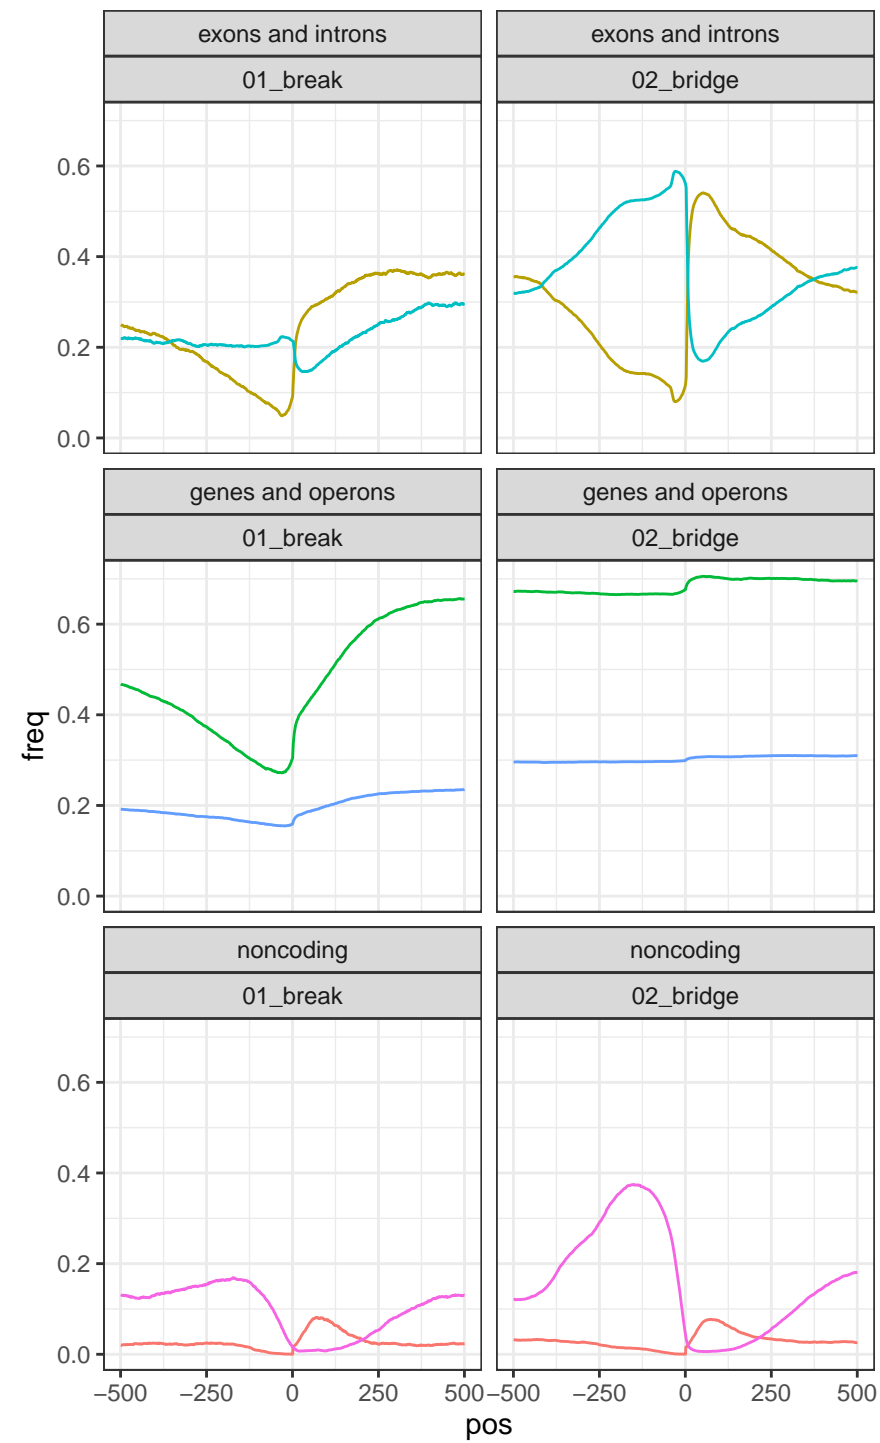

Osaka – Barcelona

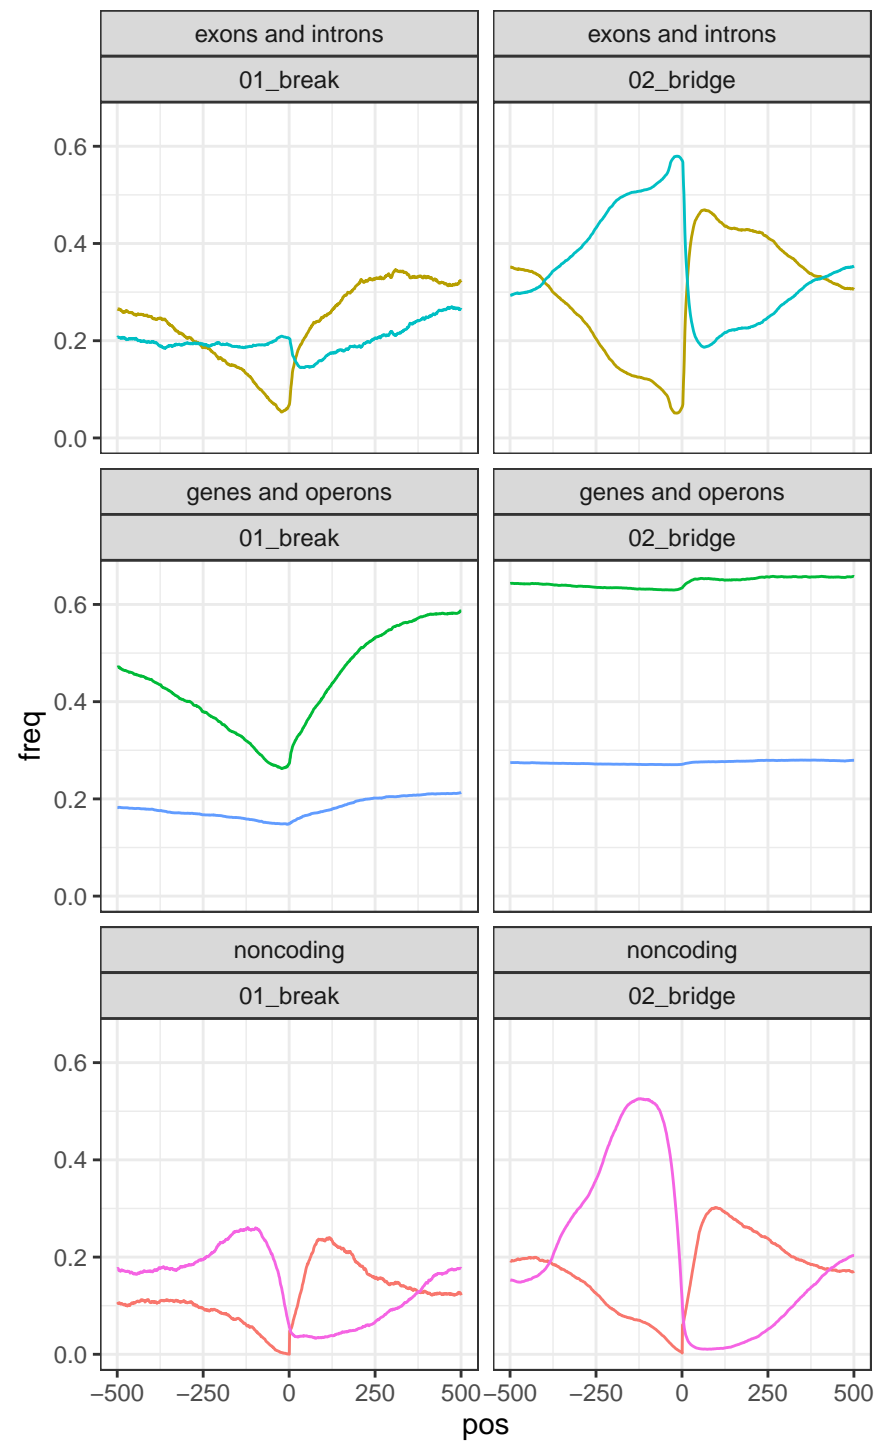

Osaka – Aomori

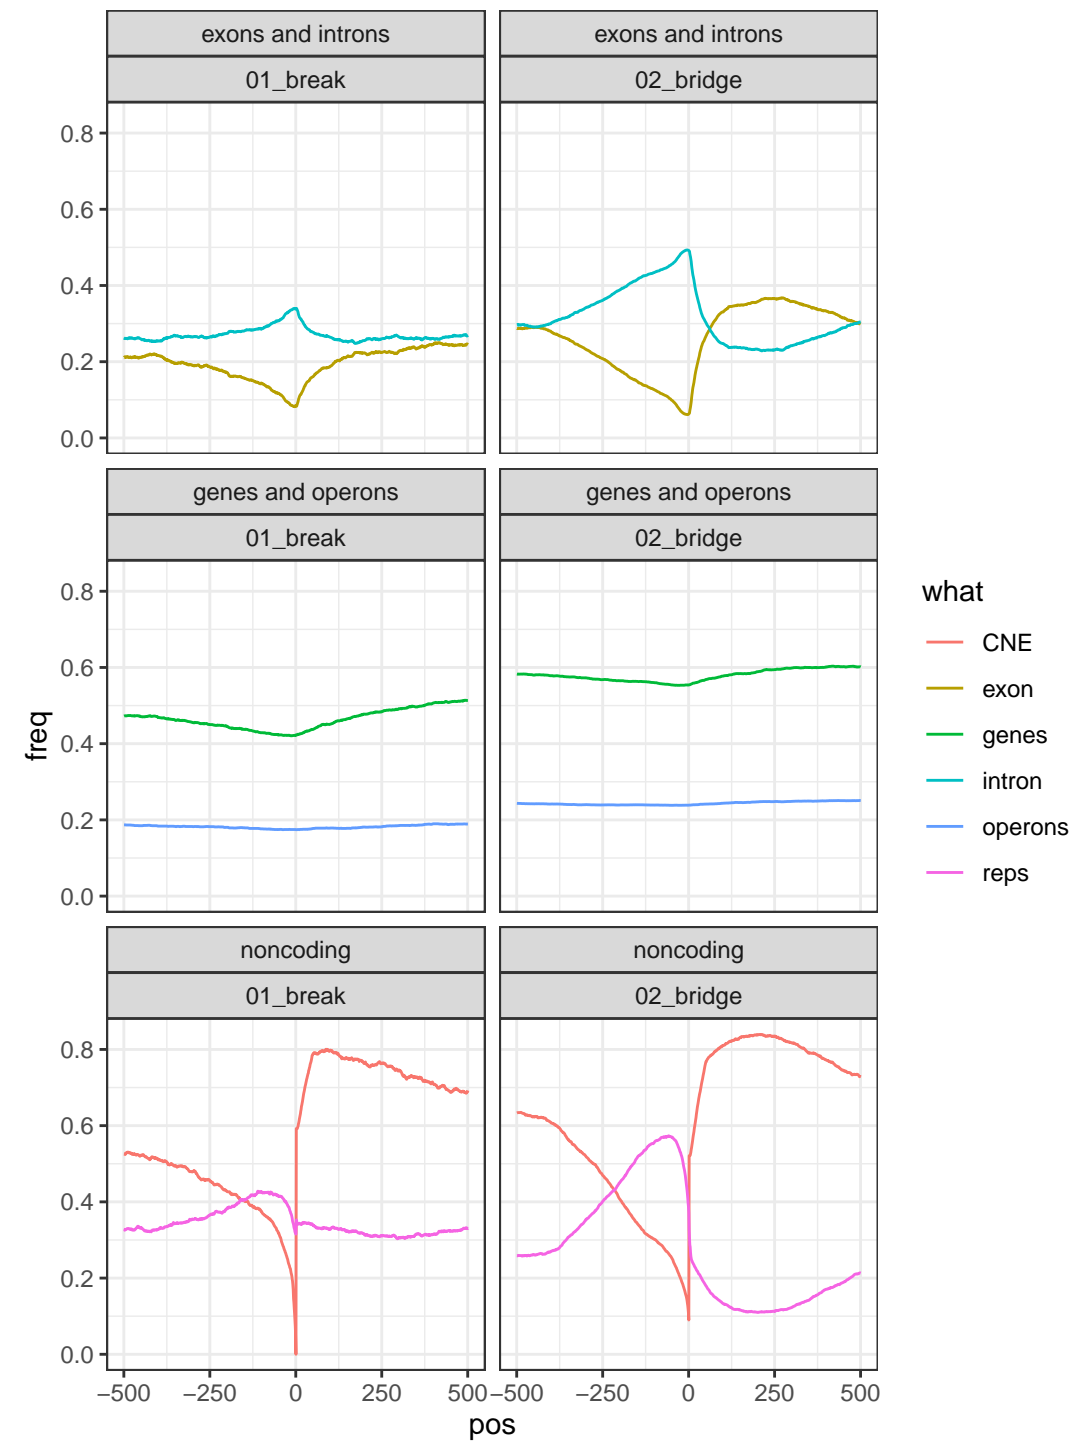

Supplement: Supplemental_Data.zip [file genomic_features_byType_Osa-1.pdf › Supplemental_Data/articles/GenomicFeatures_files/figure-html/genomic_features_byType_Osa-1.pdf]

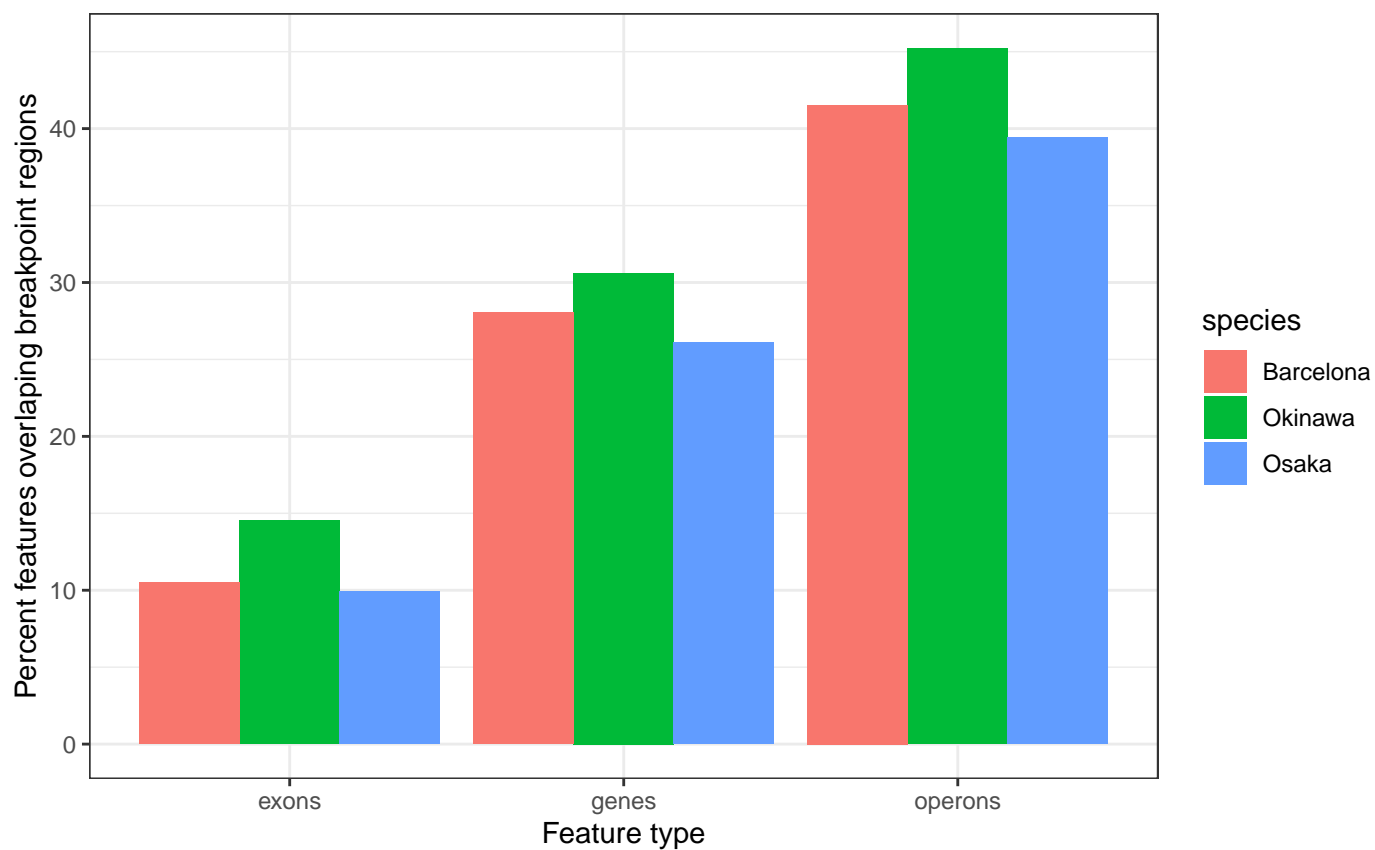

Supplement: Supplemental_Data.zip [file operon_overlap_stats_plot-1.pdf › Supplemental_Data/articles/OperonDetection_files/figure-html/operon_overlap_stats_plot-1.pdf]

# Okinawa operons

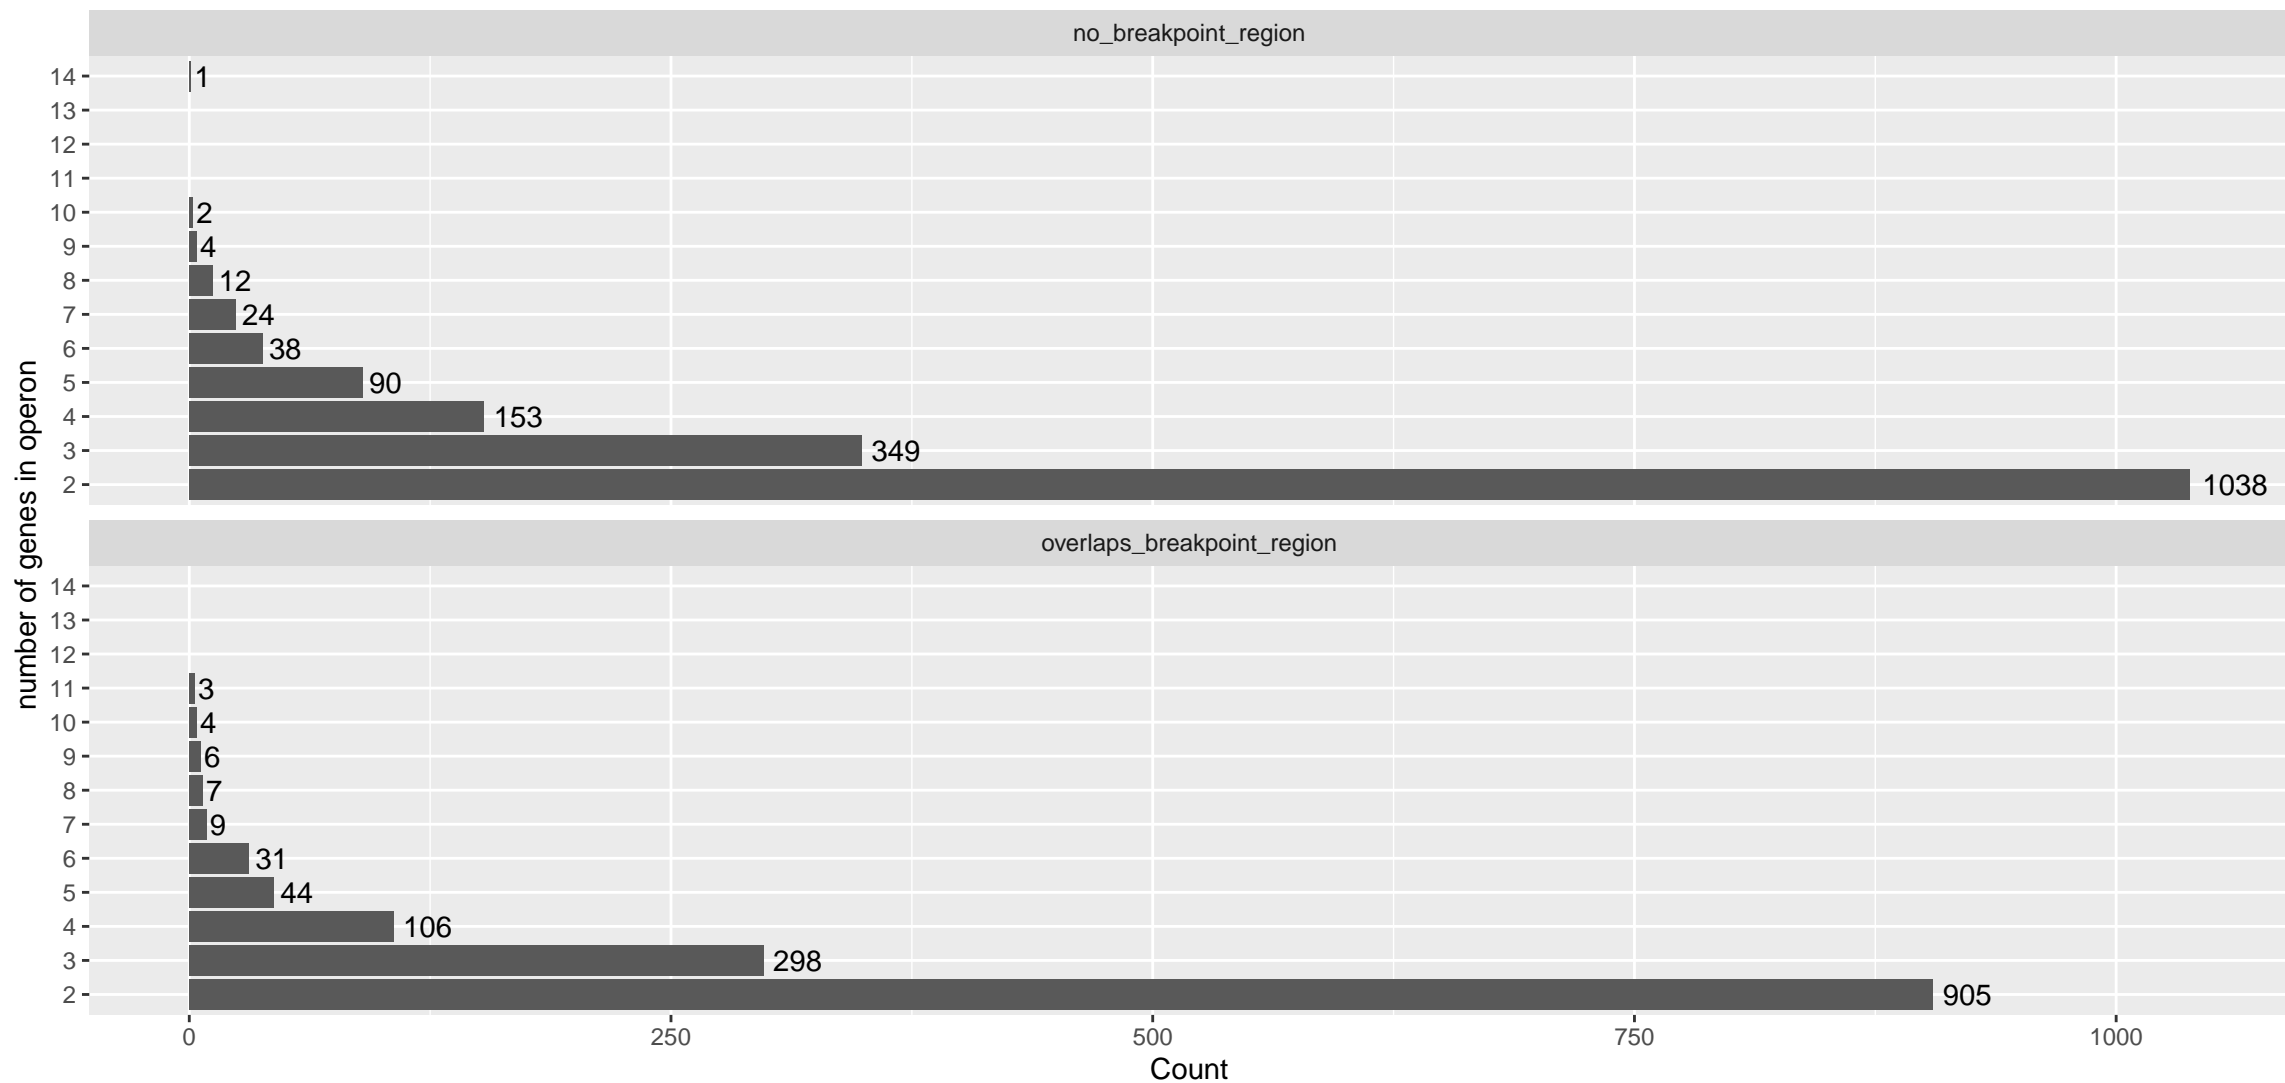

Supplement: Supplemental_Data.zip [file operon_summary_stats_plots-1.pdf › Supplemental_Data/articles/OperonDetection_files/figure-html/operon_summary_stats_plots-1.pdf]

## Osaka operons

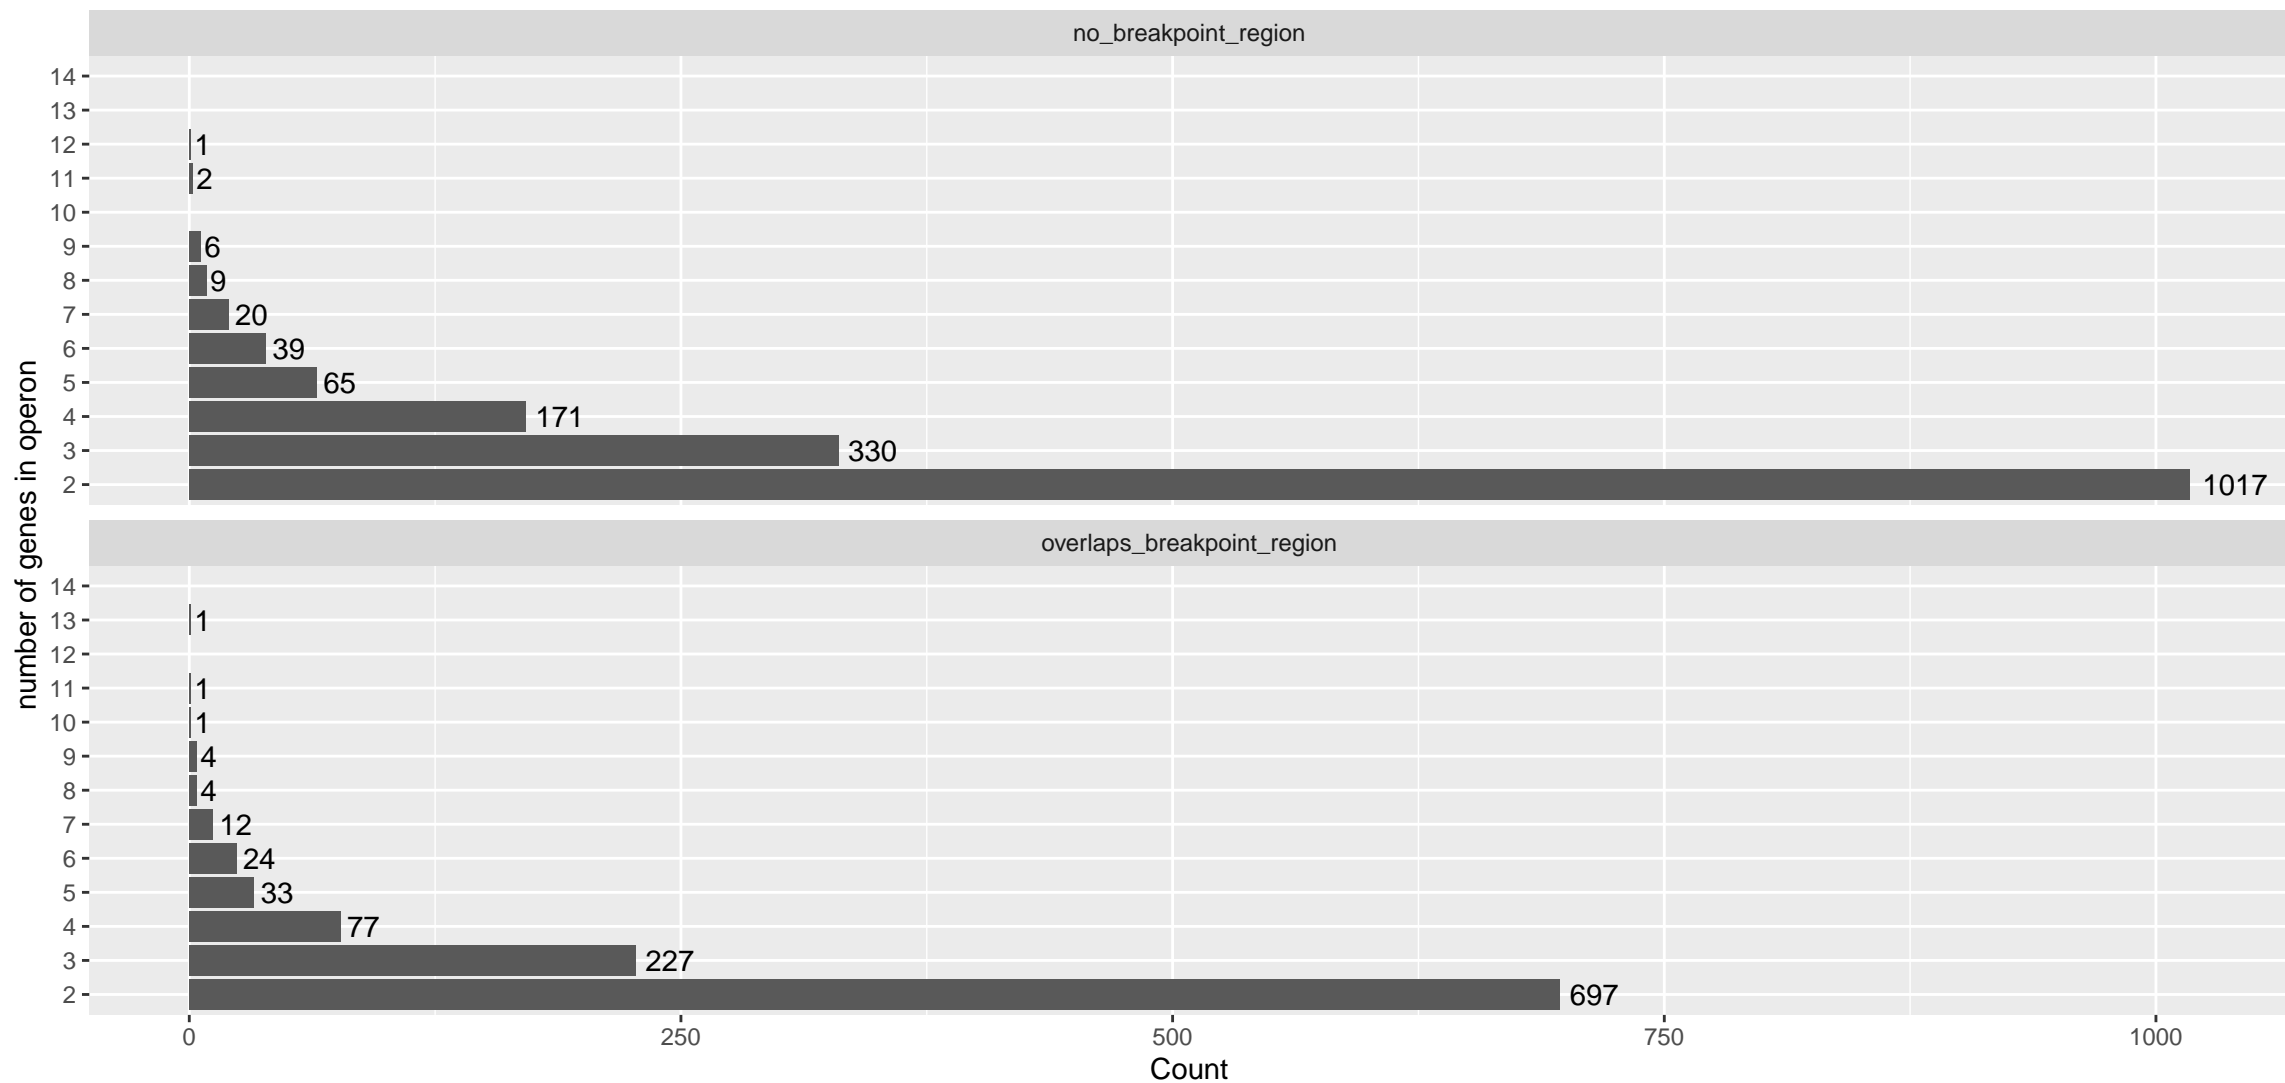

Supplement: Supplemental_Data.zip [file operon_summary_stats_plots-2.pdf › Supplemental_Data/articles/OperonDetection_files/figure-html/operon_summary_stats_plots-2.pdf]

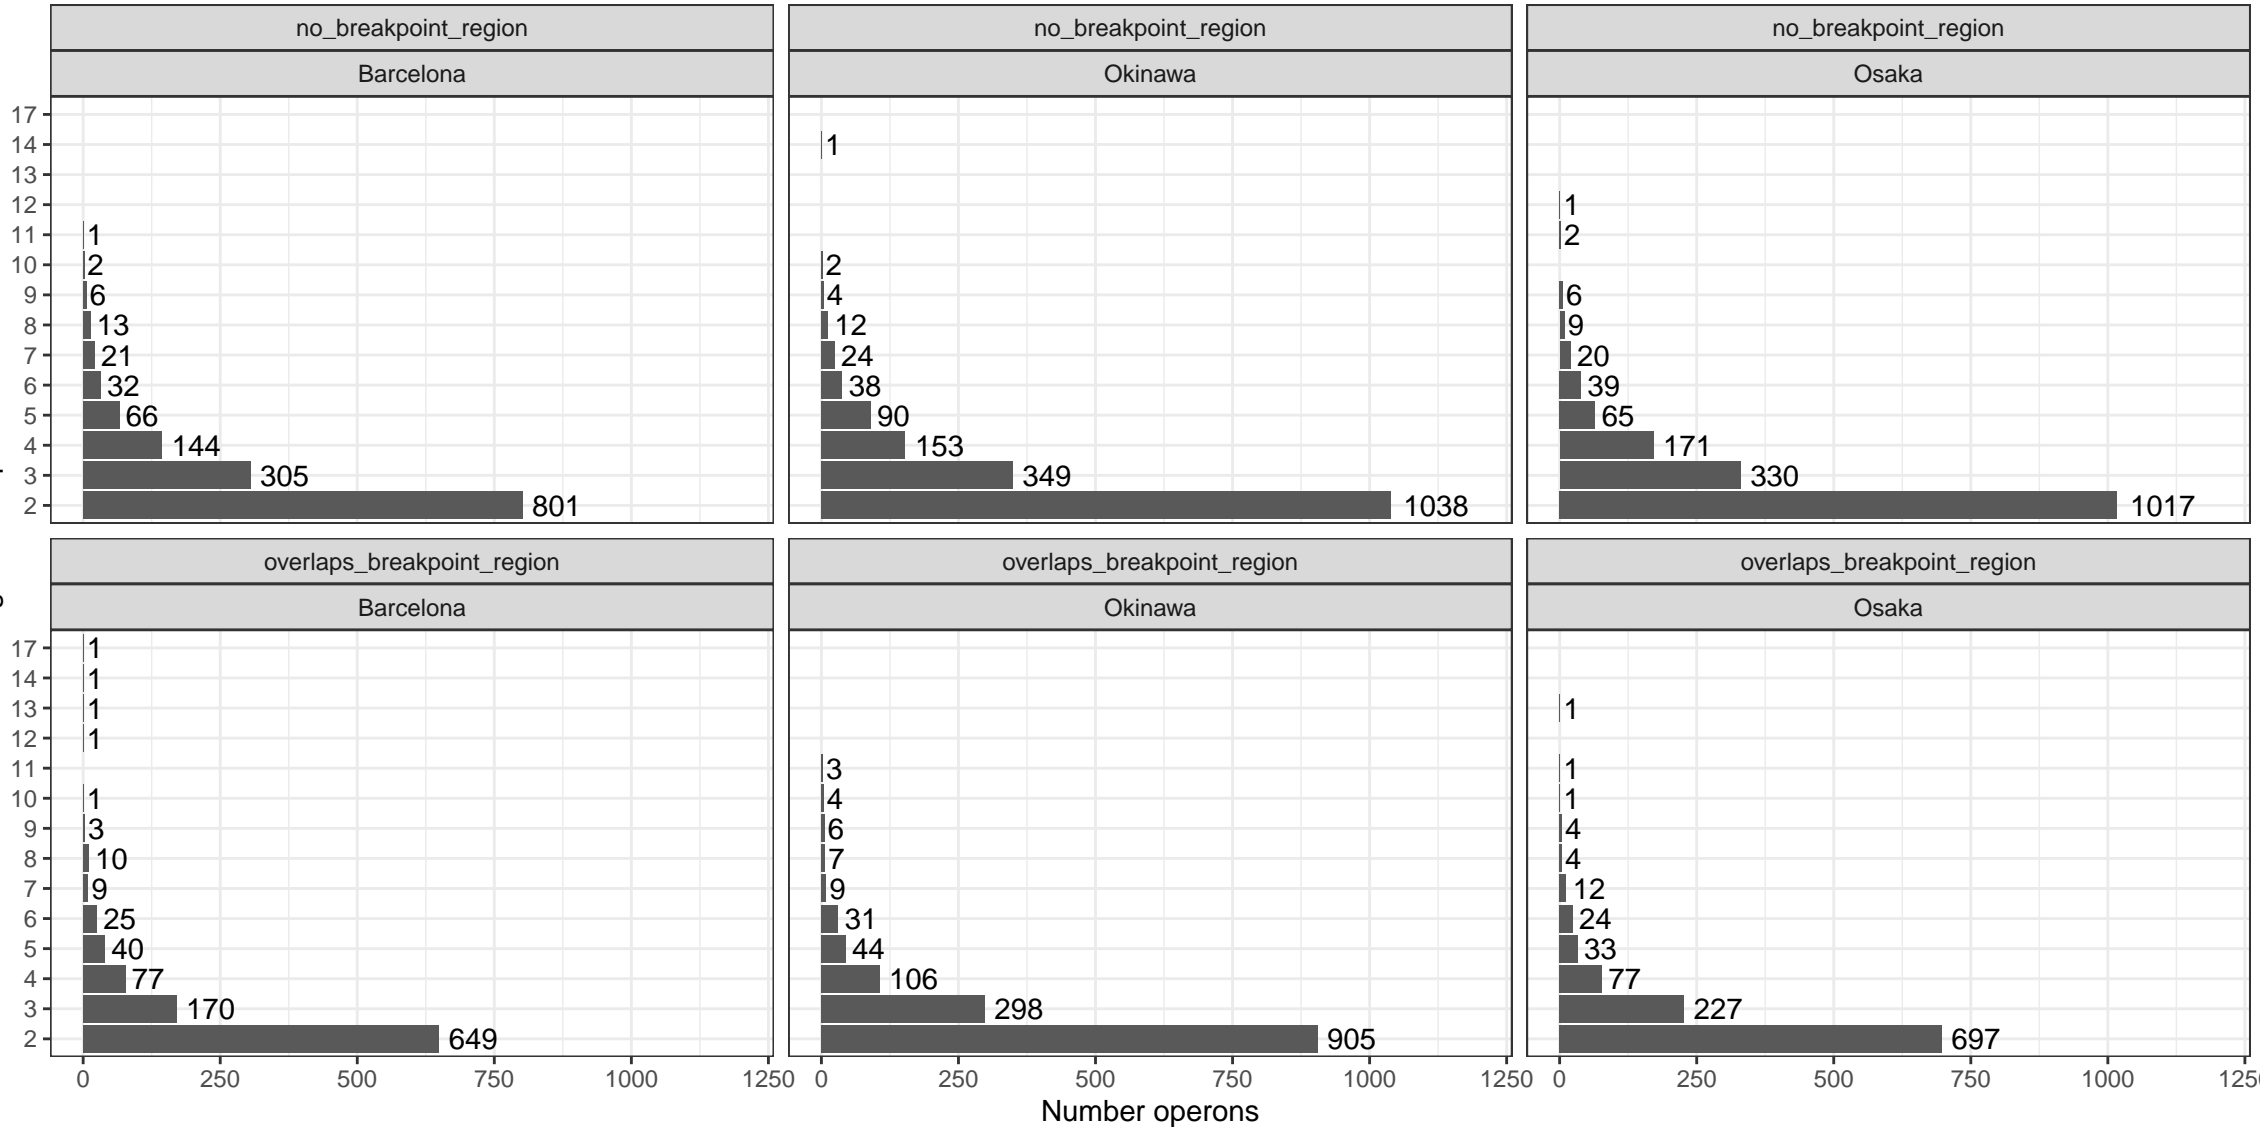

Supplement: Supplemental_Data.zip [file operon_summary_stats_plots-3.pdf › Supplemental_Data/articles/OperonDetection_files/figure-html/operon_summary_stats_plots-3.pdf]

# Okinawa operons

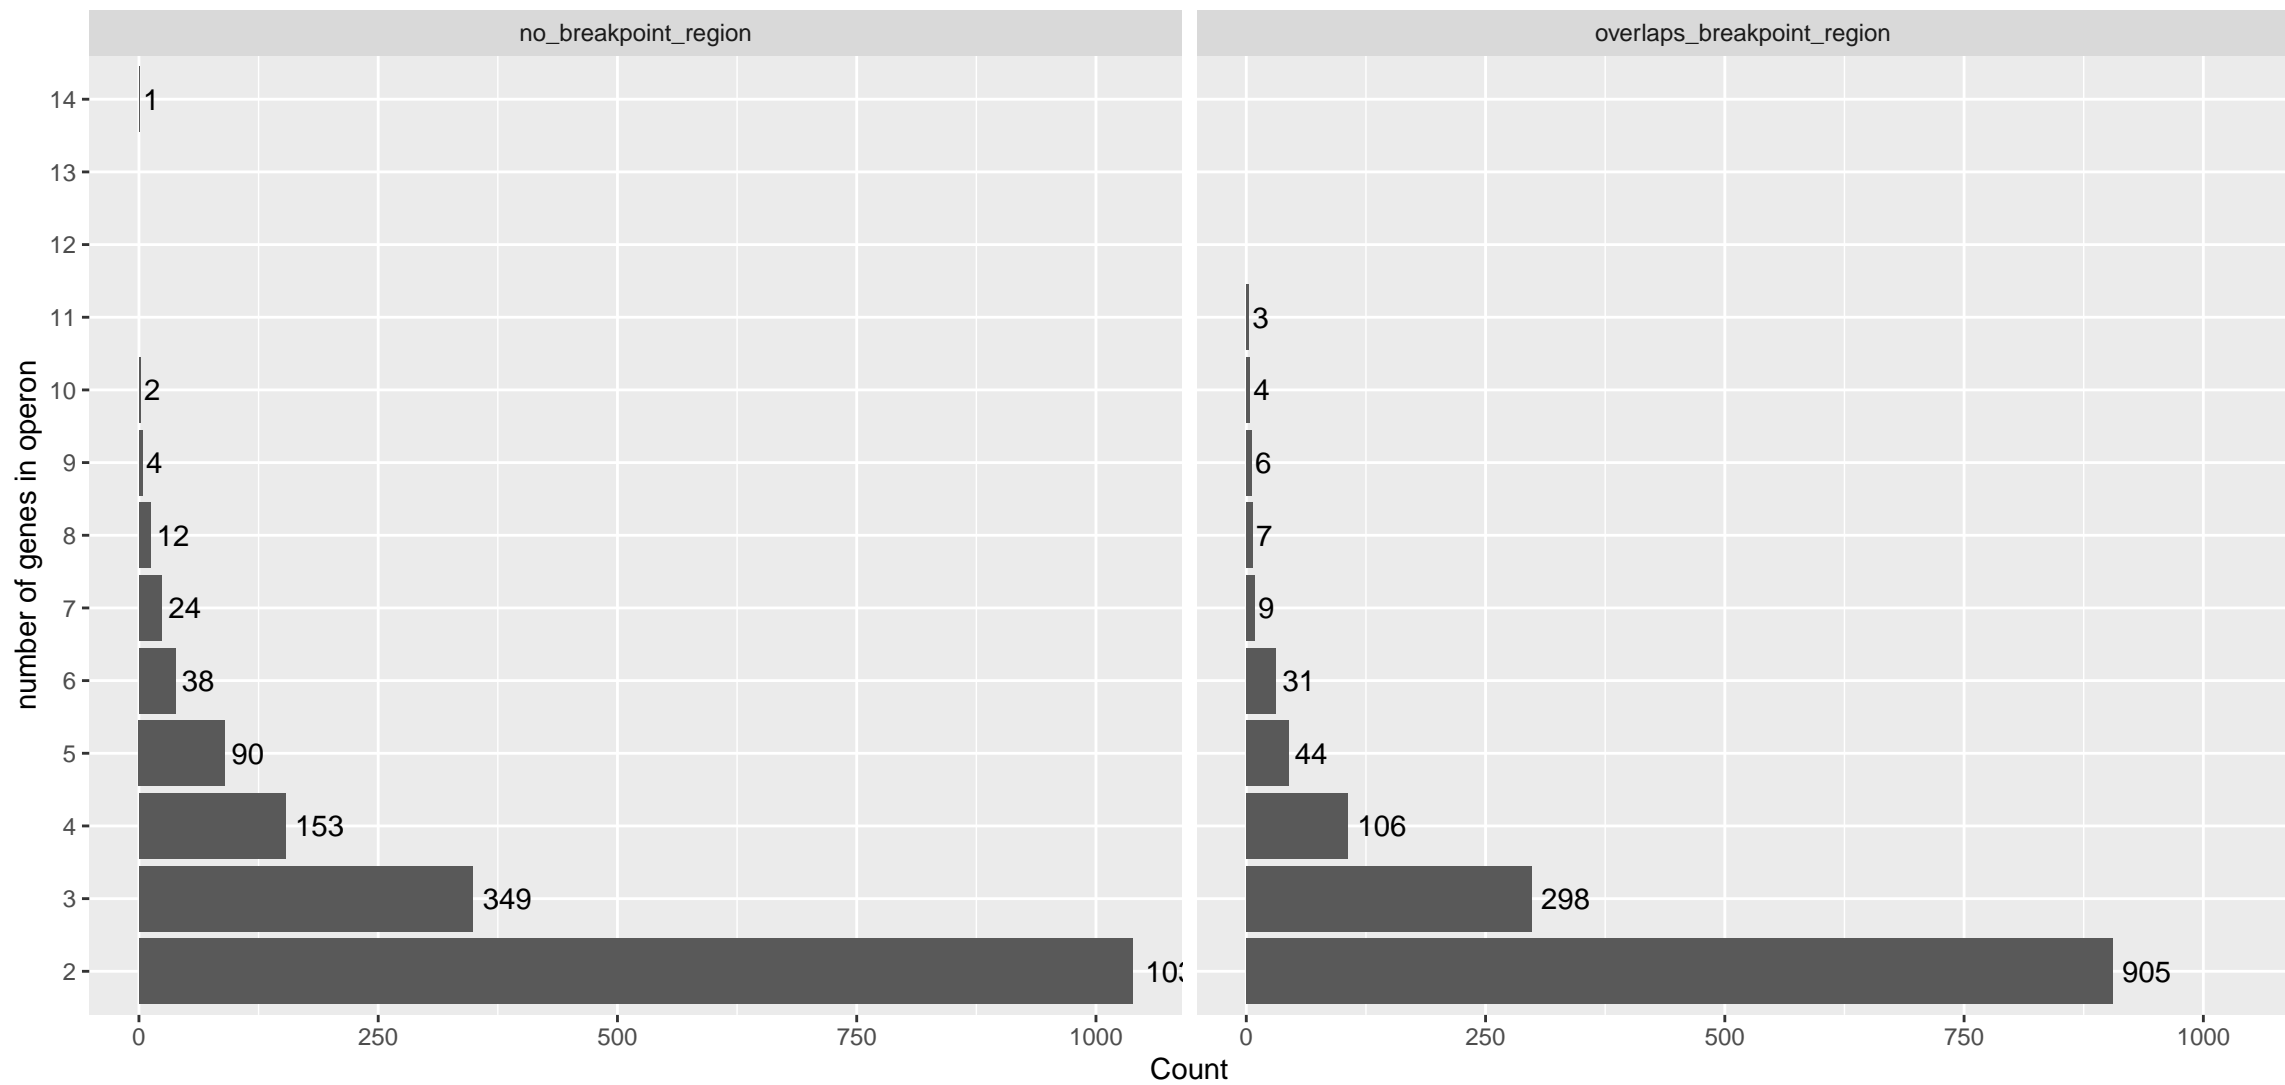

Supplement: Supplemental_Data.zip [file operon_summary_stats_plots-4.pdf › Supplemental_Data/articles/OperonDetection_files/figure-html/operon_summary_stats_plots-4.pdf]

# Osaka operons

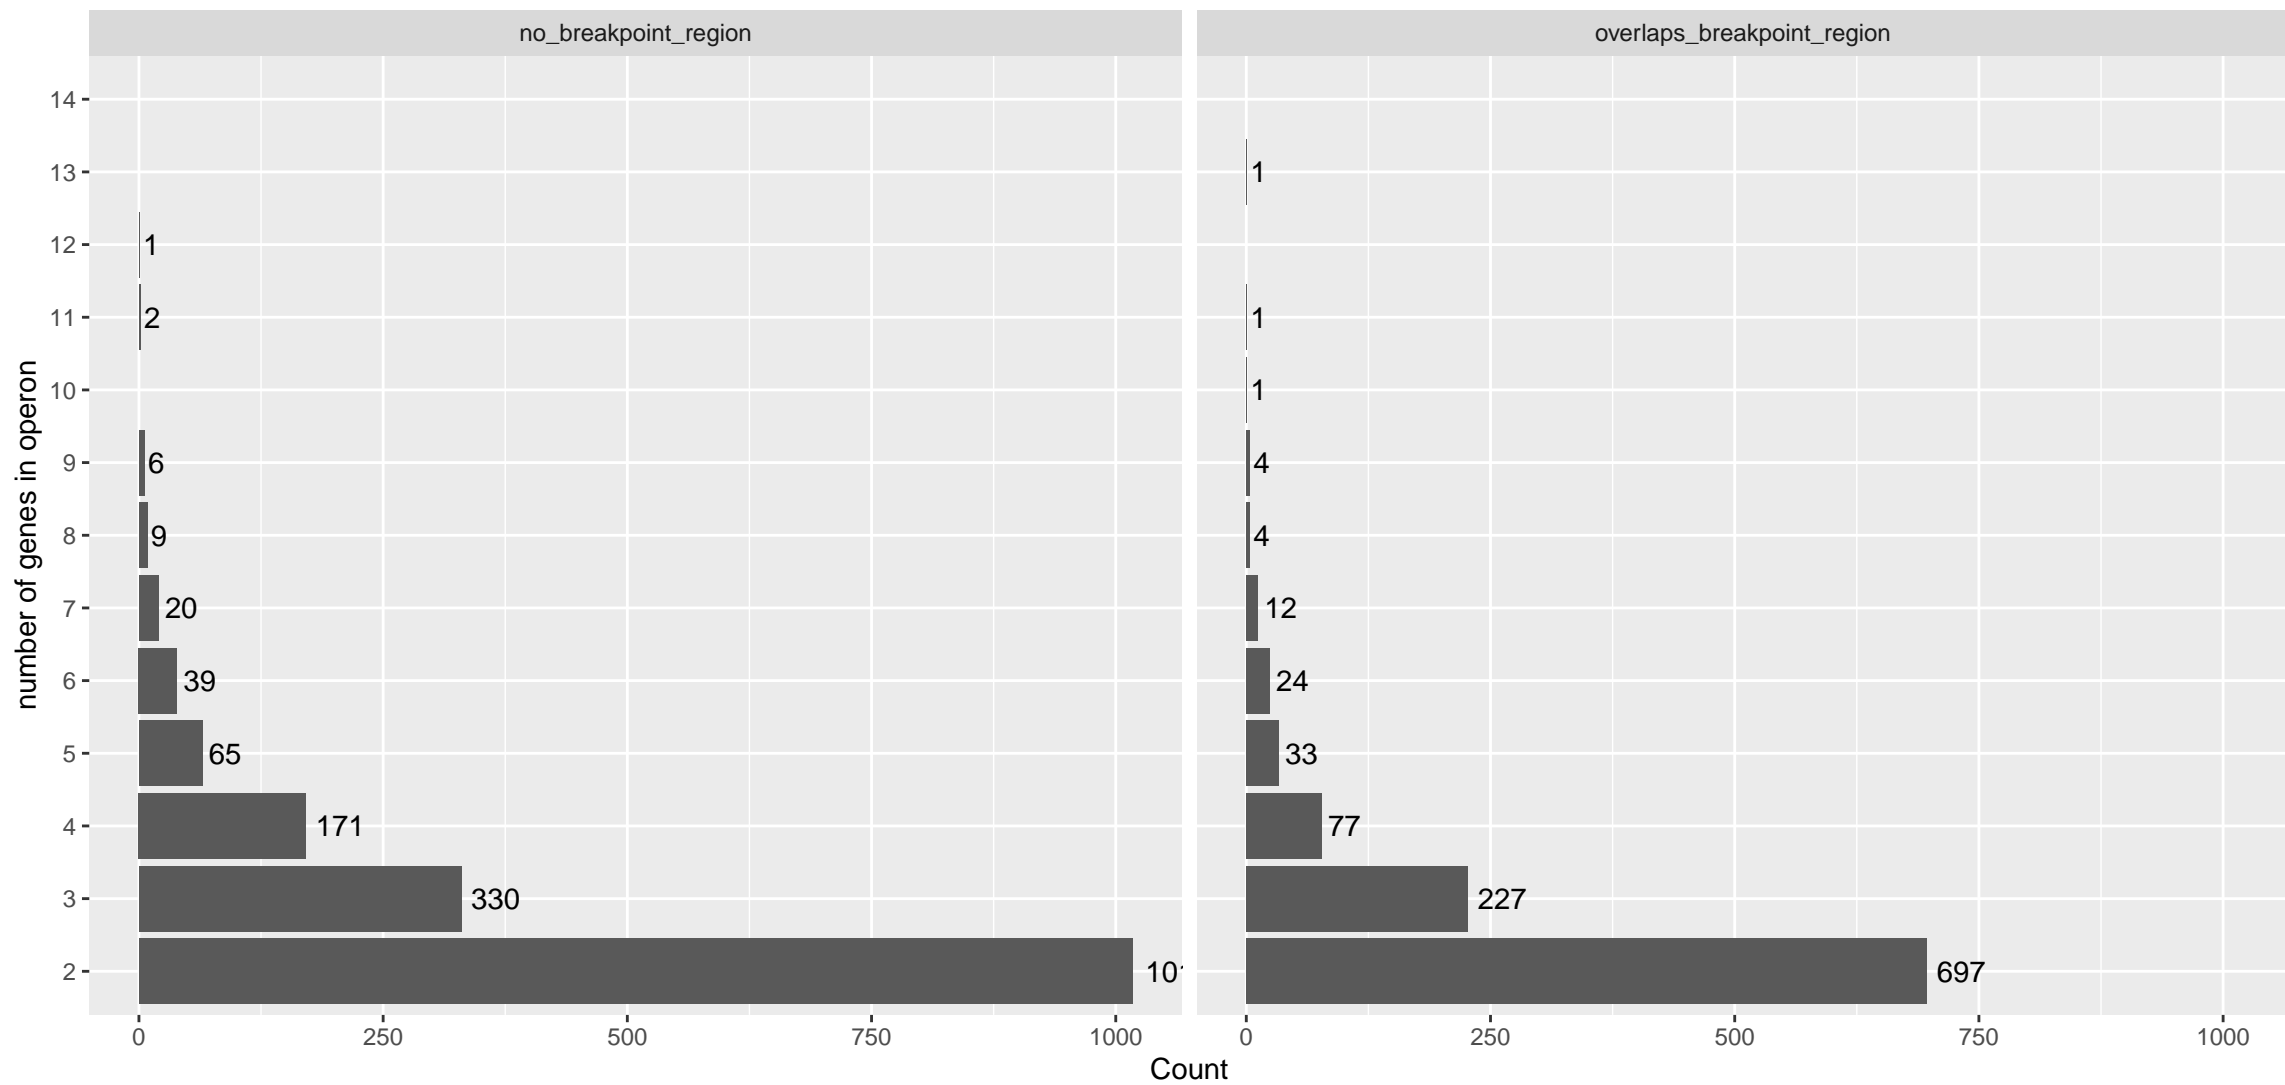

Supplement: Supplemental_Data.zip [file operon_summary_stats_plots-5.pdf › Supplemental_Data/articles/OperonDetection_files/figure-html/operon_summary_stats_plots-5.pdf]

# Okinawa operons

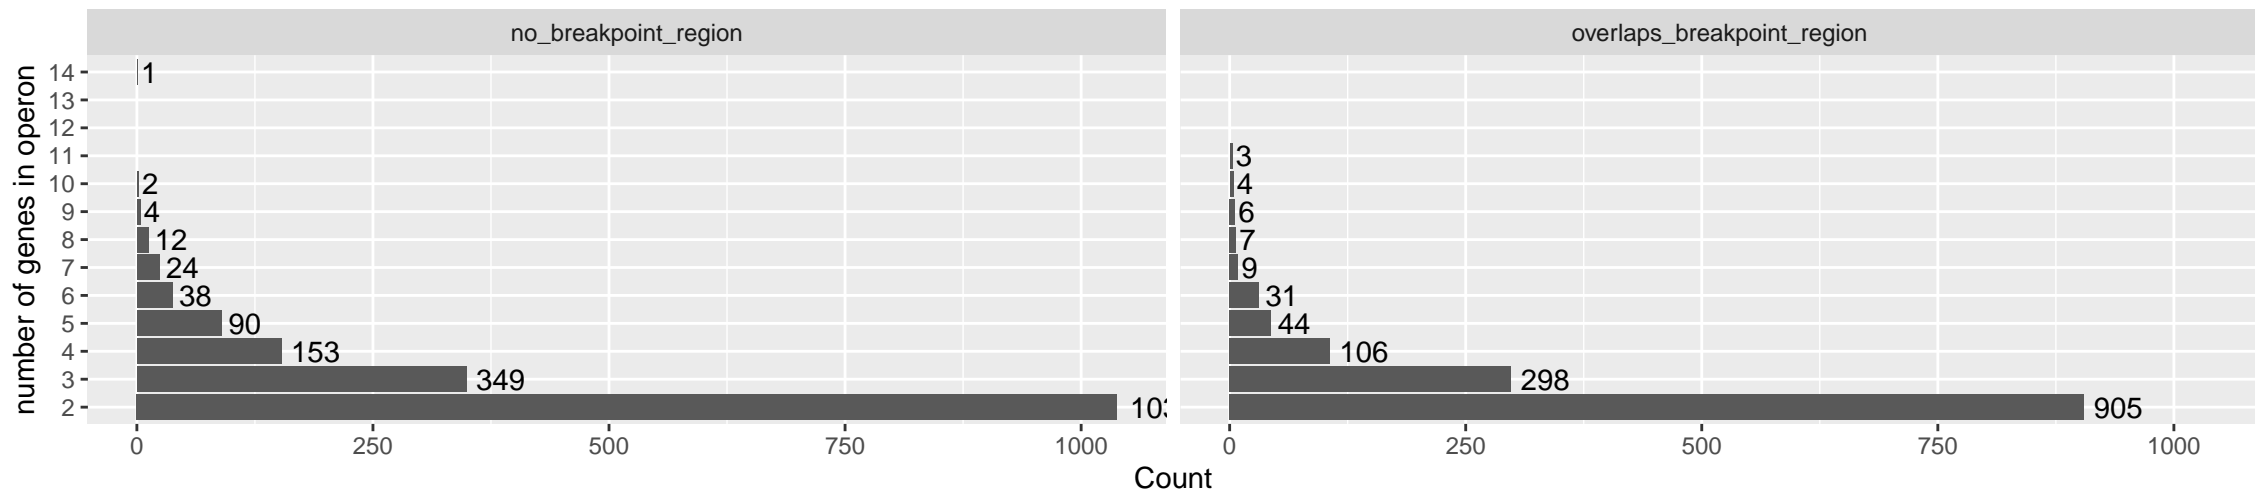

# Osaka operons

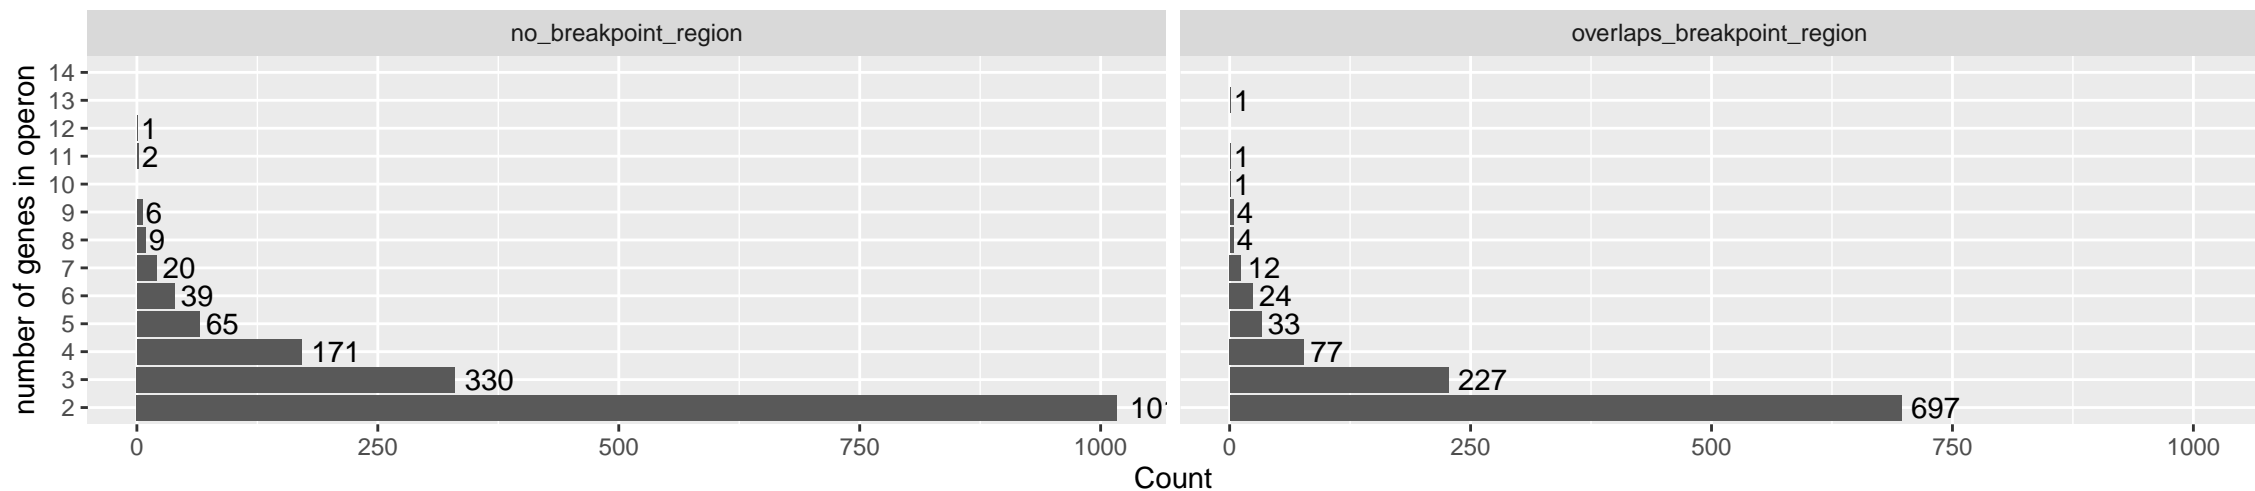

Supplement: Supplemental_Data.zip [file operon_summary_stats_plots-6.pdf › Supplemental_Data/articles/OperonDetection_files/figure-html/operon_summary_stats_plots-6.pdf]

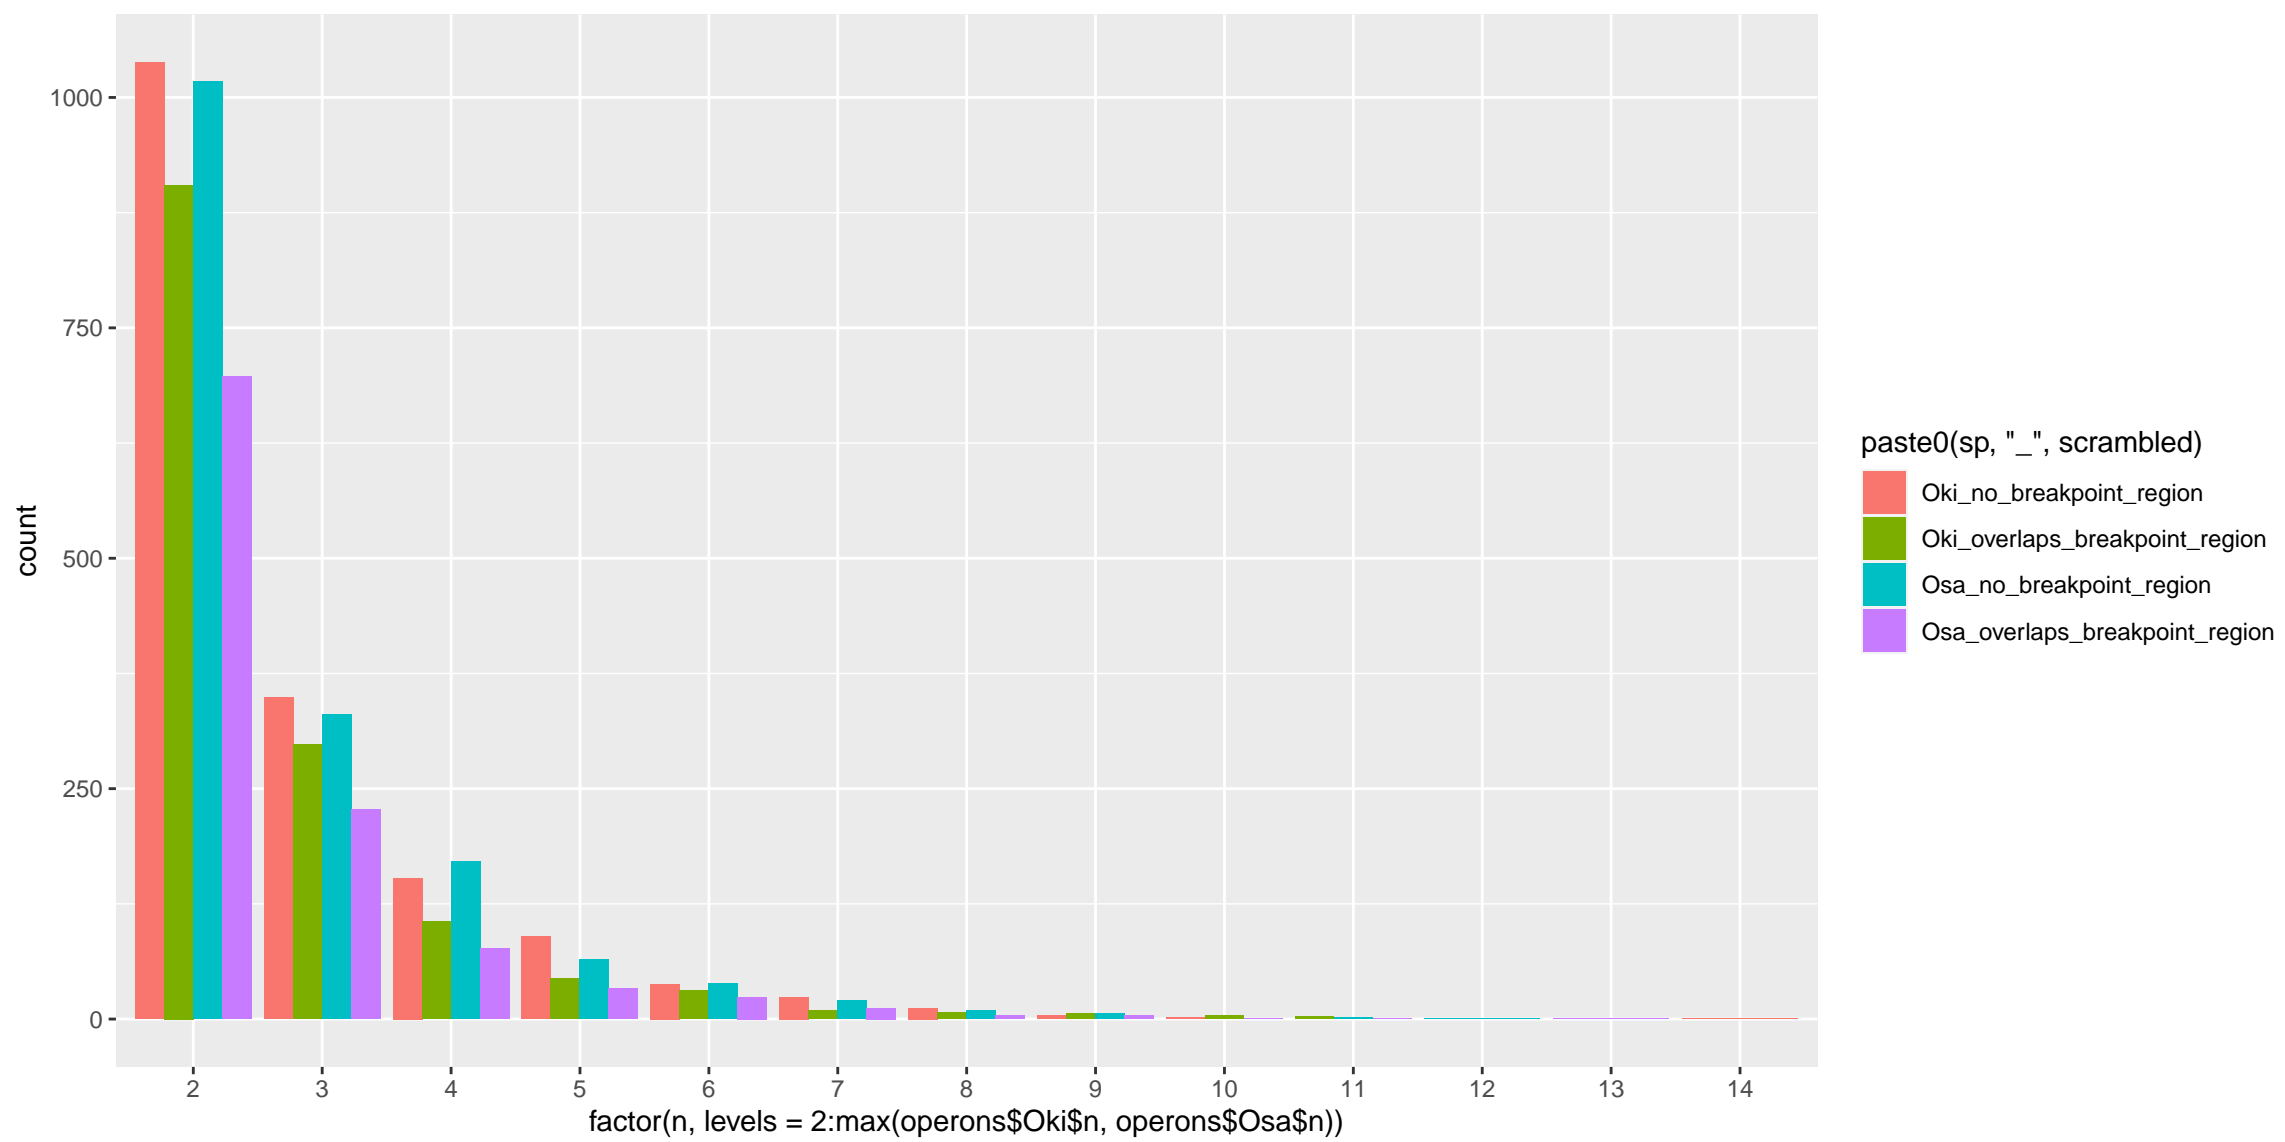

Supplement: Supplemental_Data.zip [file operon_summary_stats_plots-7.pdf › Supplemental_Data/articles/OperonDetection_files/figure-html/operon_summary_stats_plots-7.pdf]

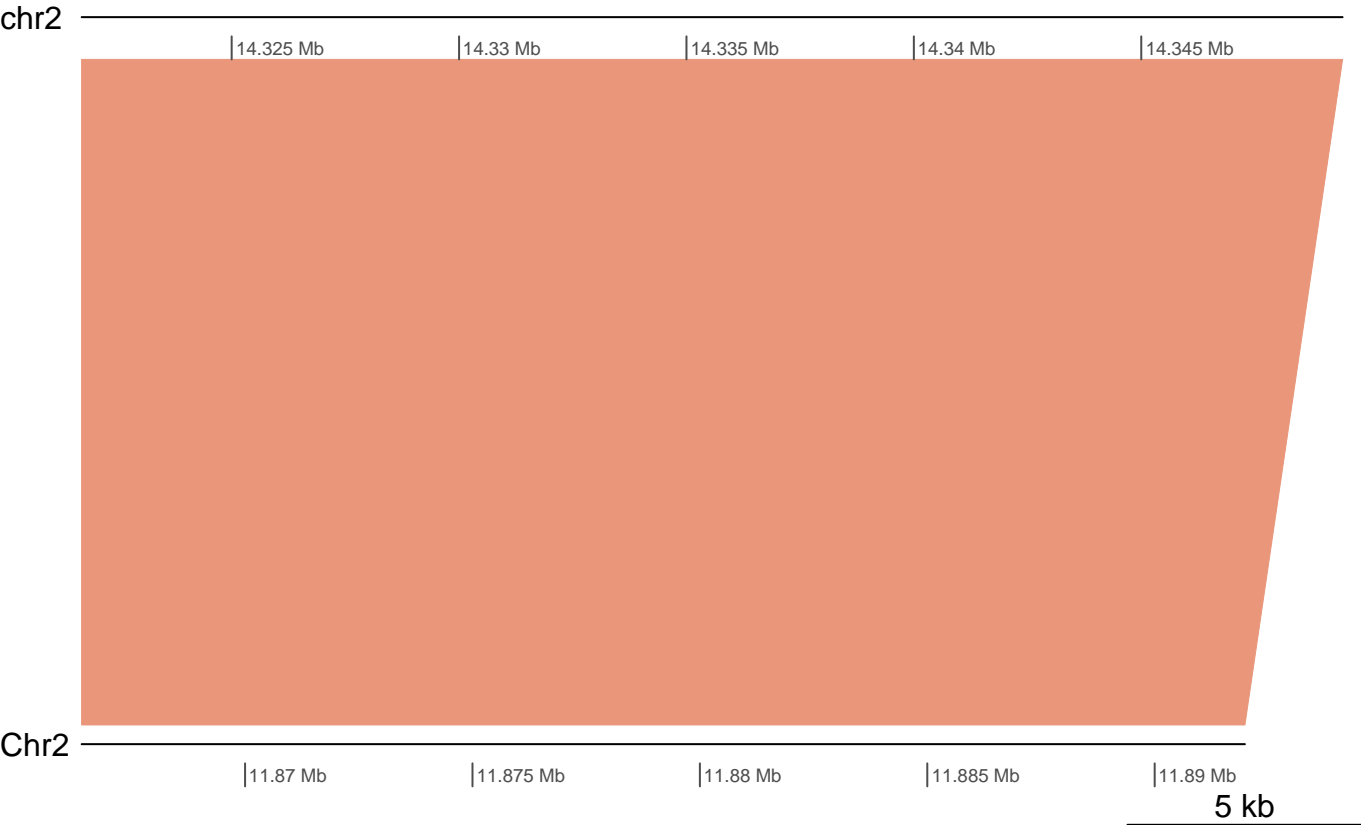

Supplement: Supplemental_Data.zip [file Hox1-1.pdf › Supplemental_Data/articles/OrthogroupSyntenies_files/figure-html/Hox1-1.pdf]

chr2

14.3 Mb 14.31 Mb 14.32 Mb 14.33 Mb 14.34 Mb 14.35 Mb 14.36 Mb 14.37 Mb

Chr2

11.84 Mb 11.85 Mb 11.86 Mb 11.87 Mb 11.88 Mb 11.89 Mb 11.9 Mb 11.91 Mb 11.92 Mb

10 kb

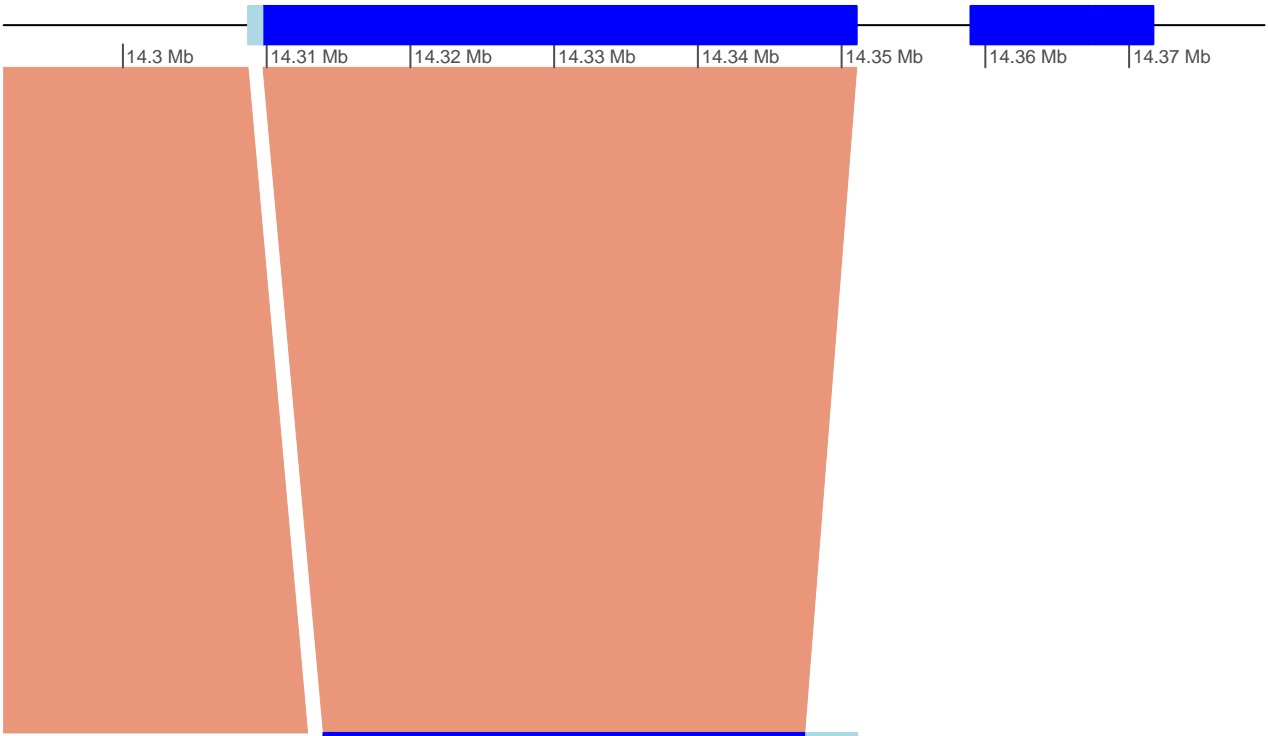

Supplement: Supplemental_Data.zip [file Hox1-2.pdf › Supplemental_Data/articles/OrthogroupSyntenies_files/figure-html/Hox1-2.pdf]

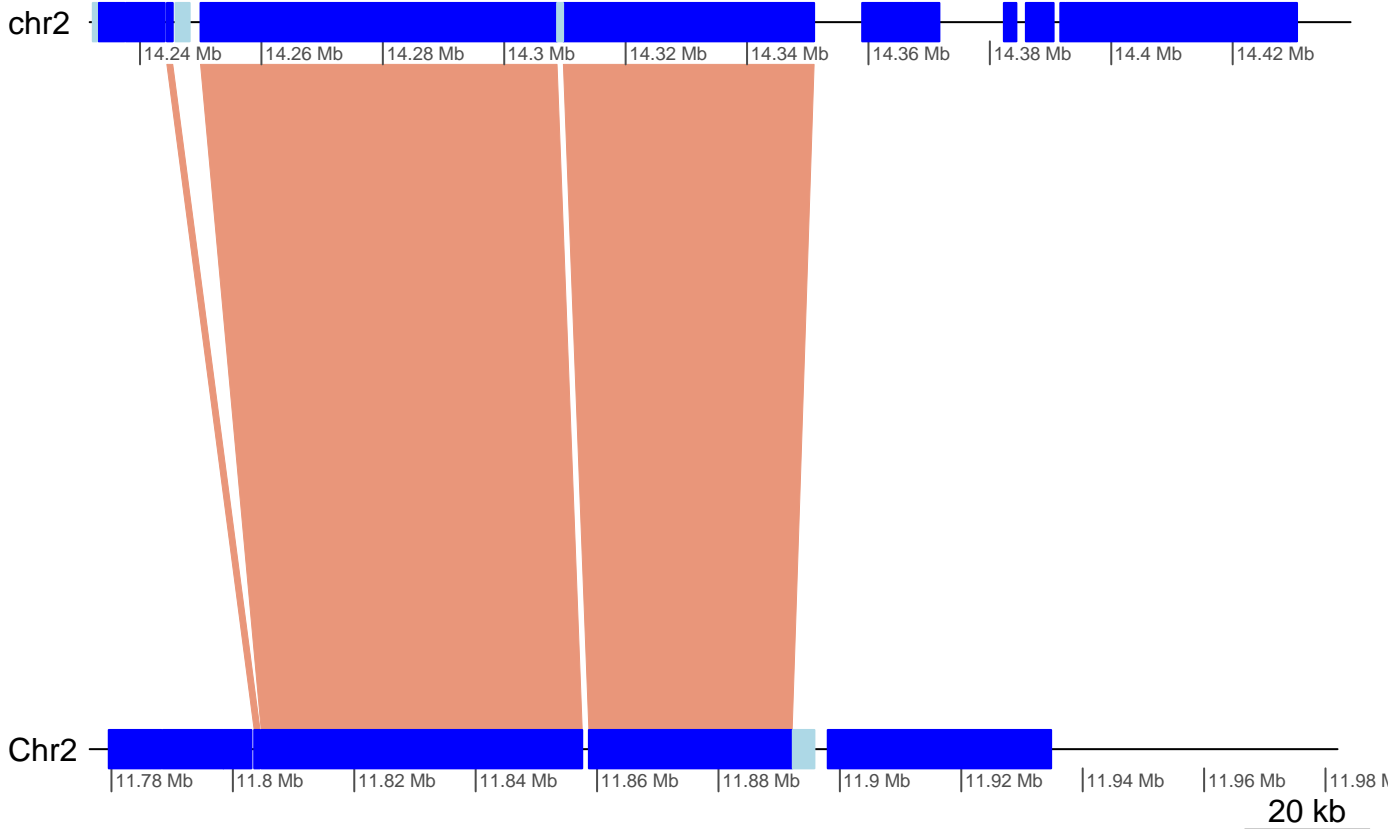

Supplement: Supplemental_Data.zip [file Hox1-3.pdf › Supplemental_Data/articles/OrthogroupSyntenies_files/figure-html/Hox1-3.pdf]

chr2

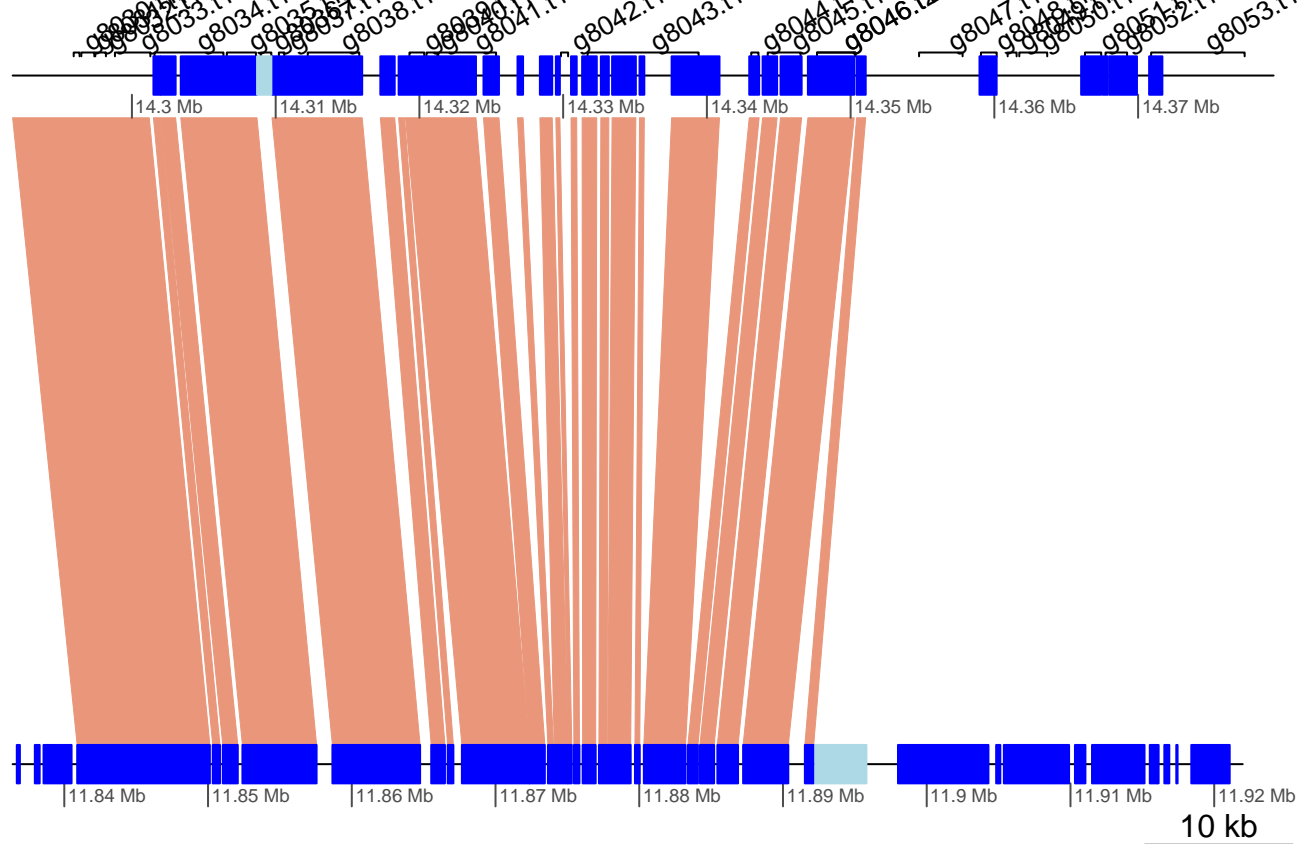

Supplement: Supplemental_Data.zip [file Hox1-4.pdf › Supplemental_Data/articles/OrthogroupSyntenies_files/figure-html/Hox1-4.pdf]

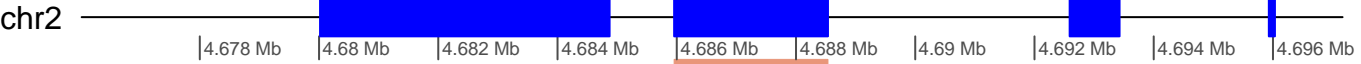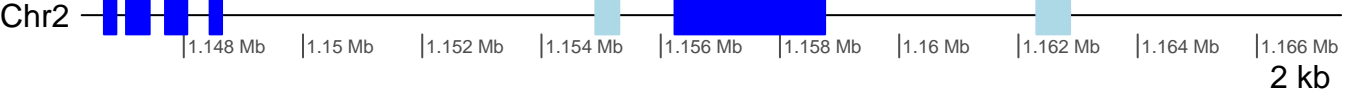

Supplement: Supplemental_Data.zip [file Hox4-1.pdf › Supplemental_Data/articles/OrthogroupSyntenies_files/figure-html/Hox4-1.pdf]

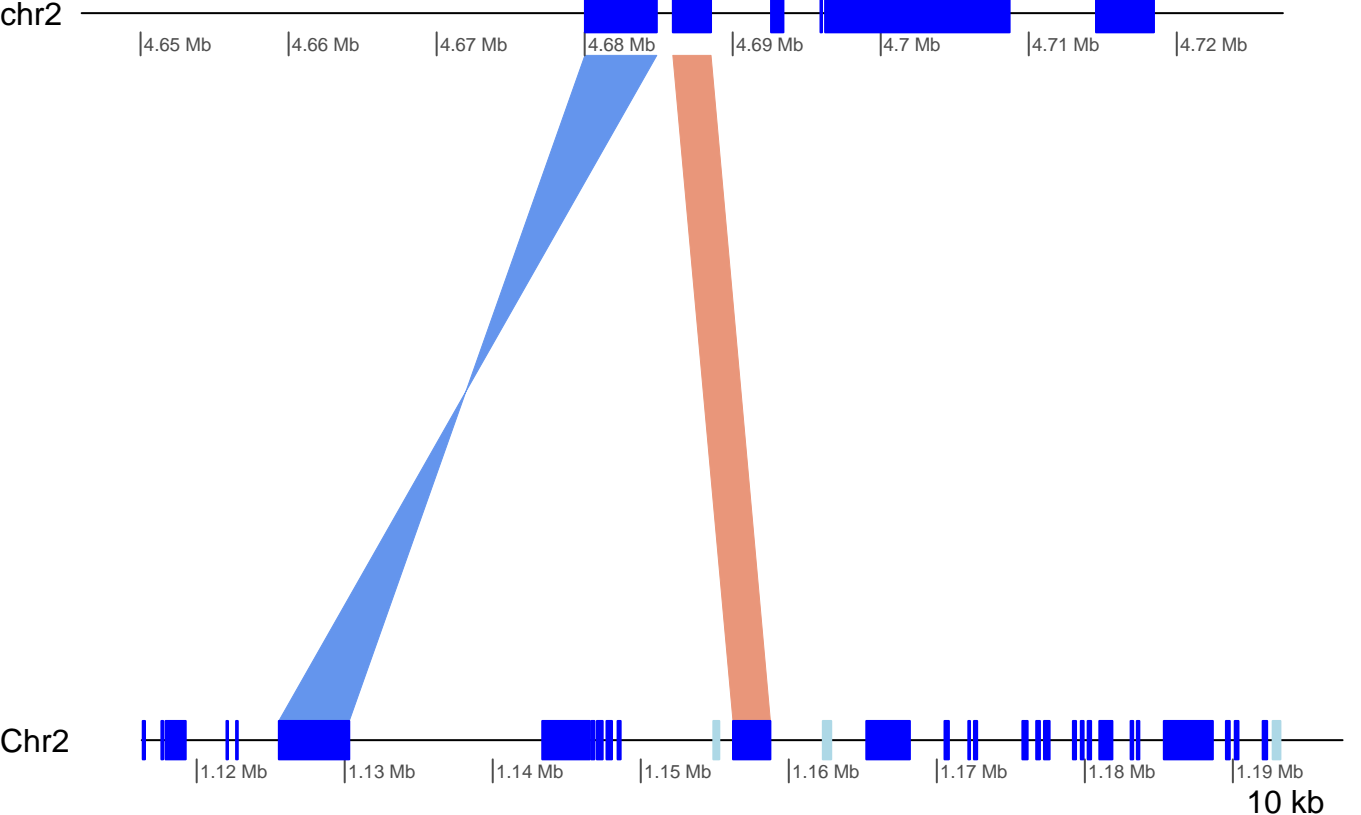

Supplement: Supplemental_Data.zip [file Hox4-2.pdf › Supplemental_Data/articles/OrthogroupSyntenies_files/figure-html/Hox4-2.pdf]

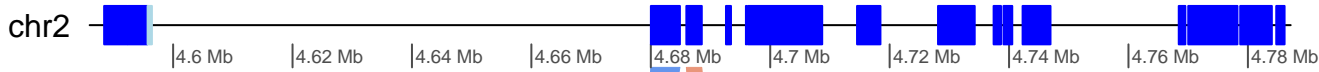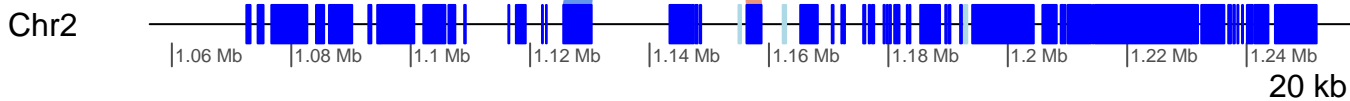

Supplement: Supplemental_Data.zip [file Hox4-3.pdf › Supplemental_Data/articles/OrthogroupSyntenies_files/figure-html/Hox4-3.pdf]

chr2

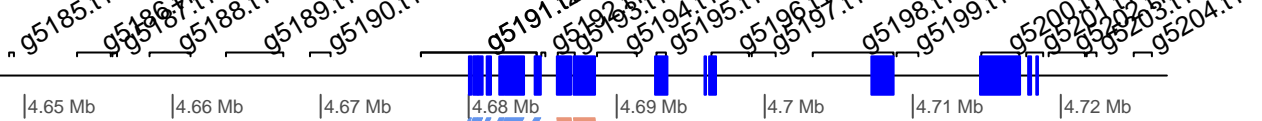

Chr2

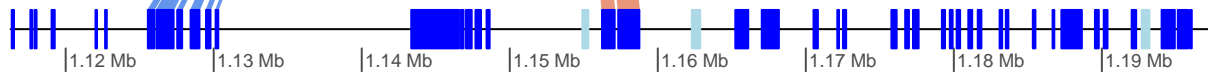

10 kb

Supplement: Supplemental_Data.zip [file Hox4-4.pdf › Supplemental_Data/articles/OrthogroupSyntenies_files/figure-html/Hox4-4.pdf]

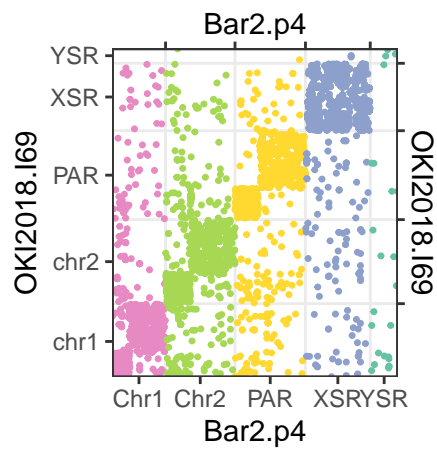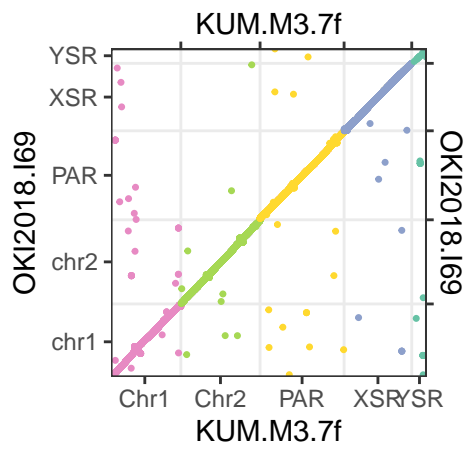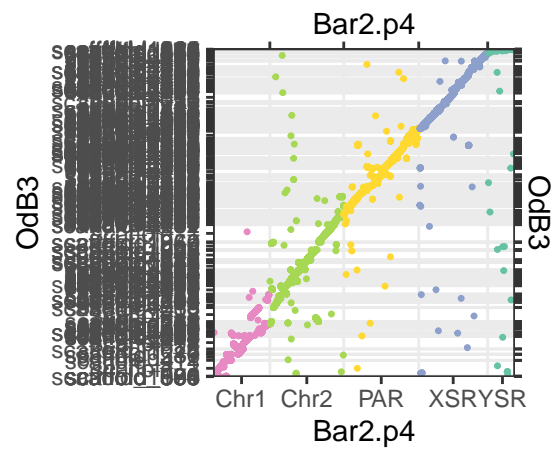

Supplement: Supplemental_Data.zip [file orthopair_plots_suppl-1.pdf › Supplemental_Data/articles/OrthogroupSyntenies_files/figure-html/orthopair_plots_suppl-1.pdf]

# Syntenic block size distribution

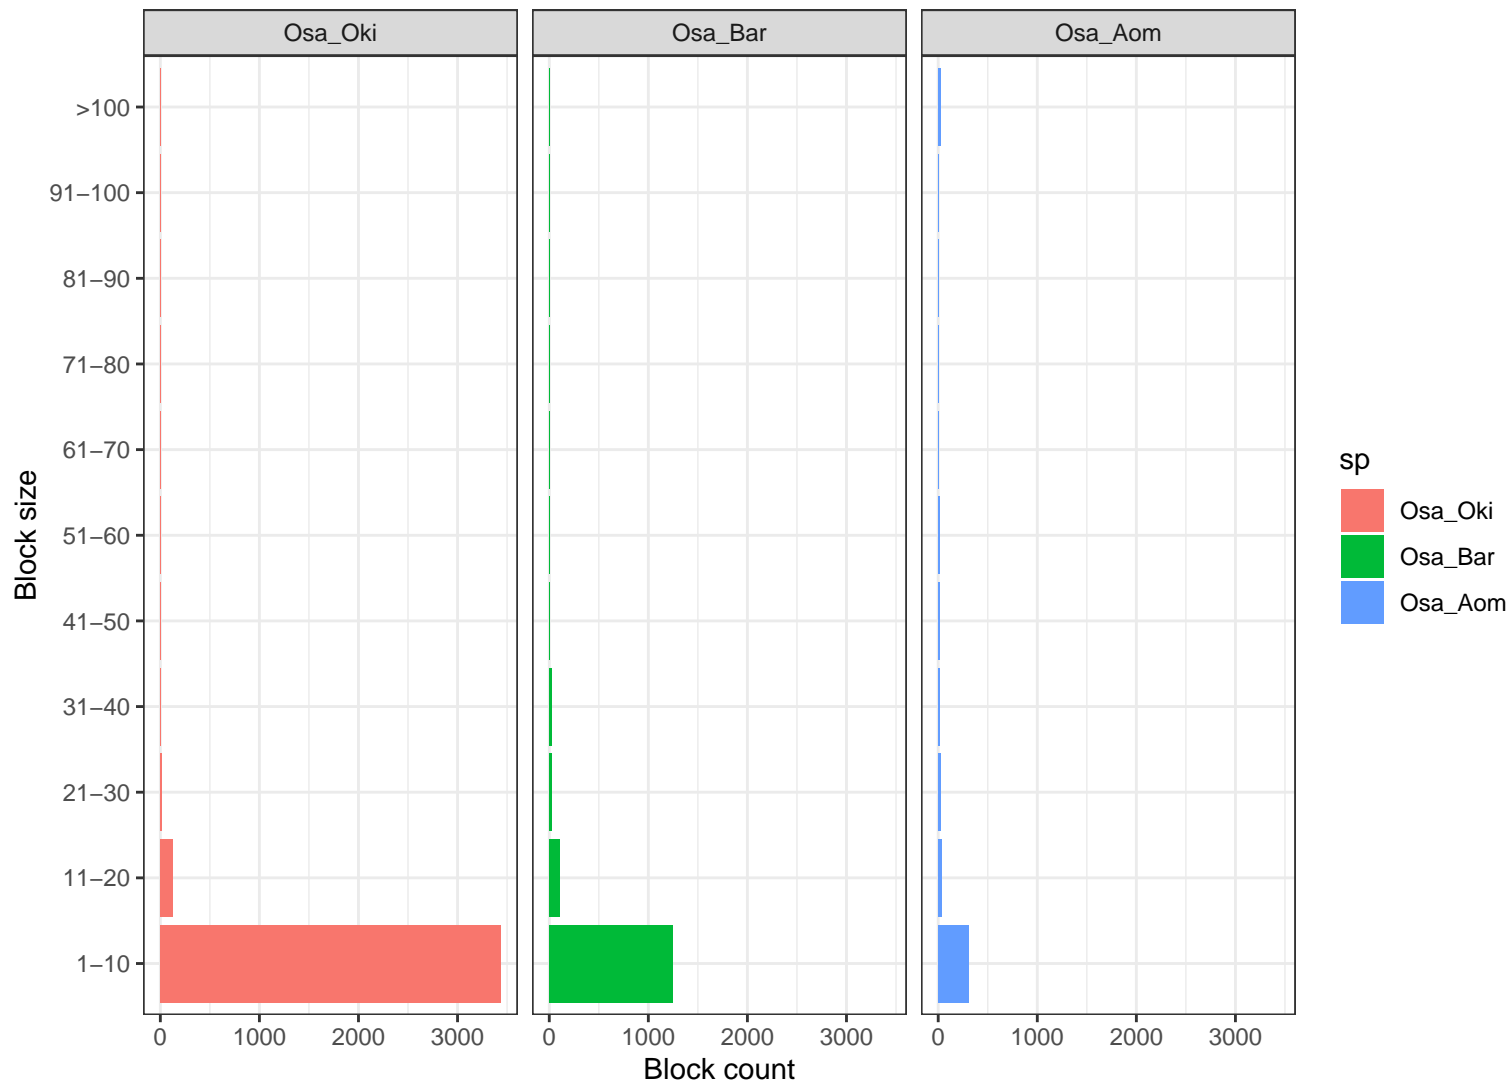

Supplement: Supplemental_Data.zip [file synteny_block_histograms_3-1.pdf › Supplemental_Data/articles/OrthogroupSyntenies_files/figure-html/synteny_block_histograms_3-1.pdf]

# Syntenic block size distribution

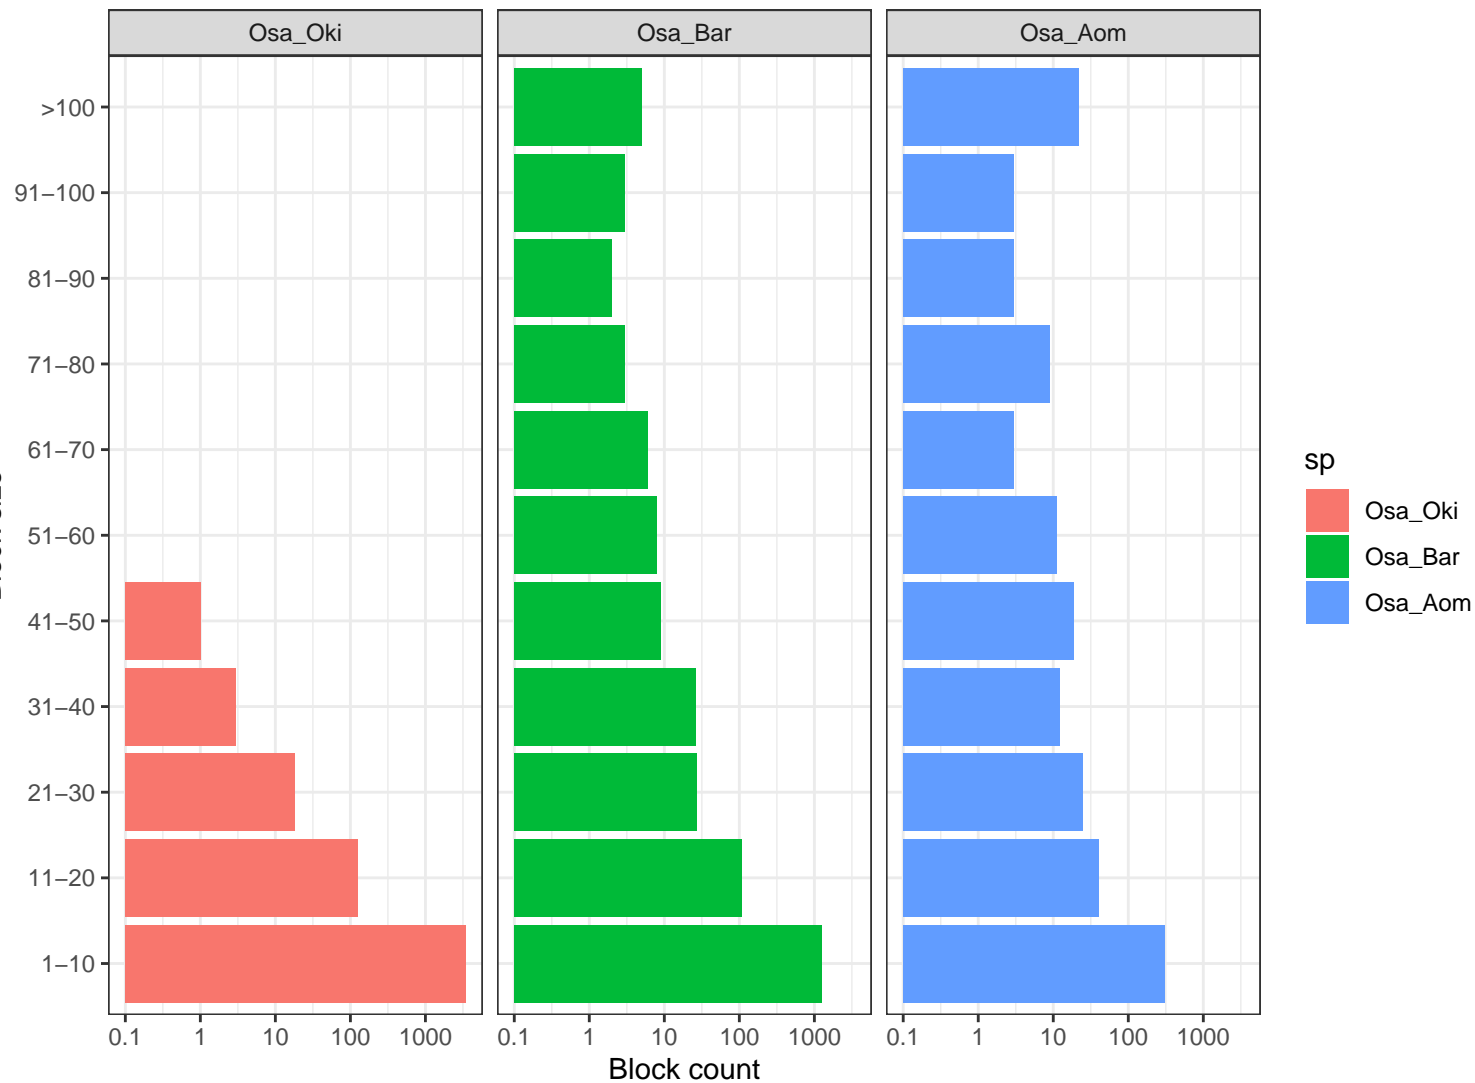

Supplement: Supplemental_Data.zip [file synteny_block_histograms_3-2.pdf › Supplemental_Data/articles/OrthogroupSyntenies_files/figure-html/synteny_block_histograms_3-2.pdf]

# Number of genes in syntenic blocks

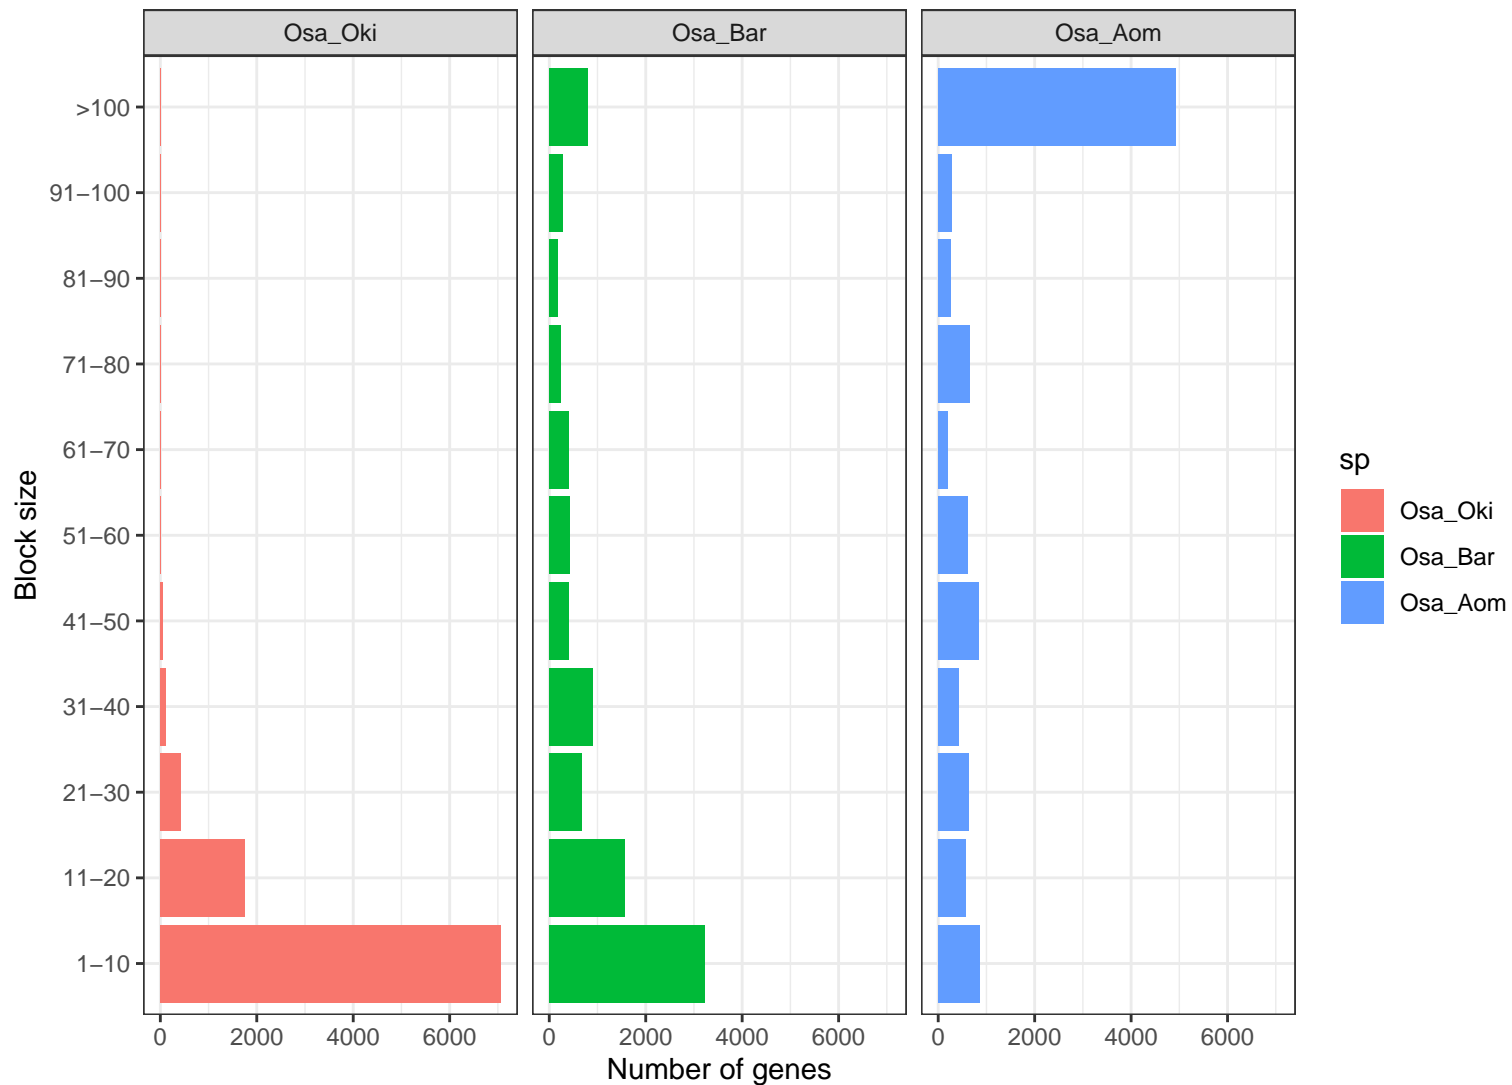

Supplement: Supplemental_Data.zip [file synteny_block_histograms_3-3.pdf › Supplemental_Data/articles/OrthogroupSyntenies_files/figure-html/synteny_block_histograms_3-3.pdf]

# Syntenic block size distribution

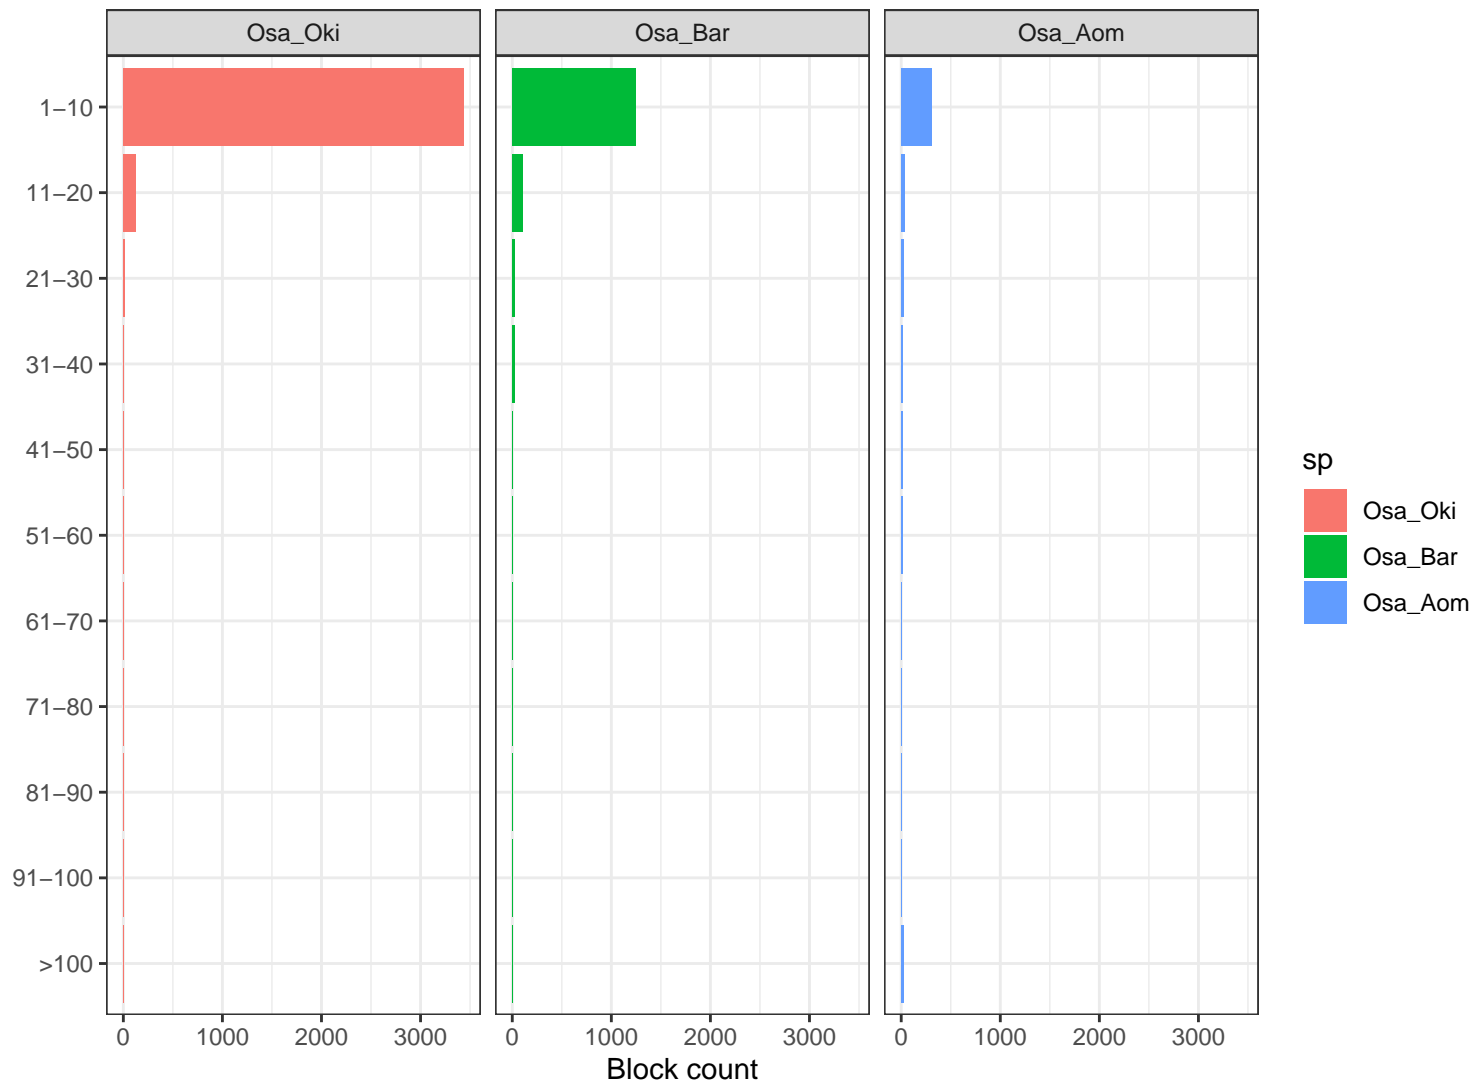

Supplement: Supplemental_Data.zip [file synteny_block_histograms_3-4.pdf › Supplemental_Data/articles/OrthogroupSyntenies_files/figure-html/synteny_block_histograms_3-4.pdf]

# Syntenic block size distribution

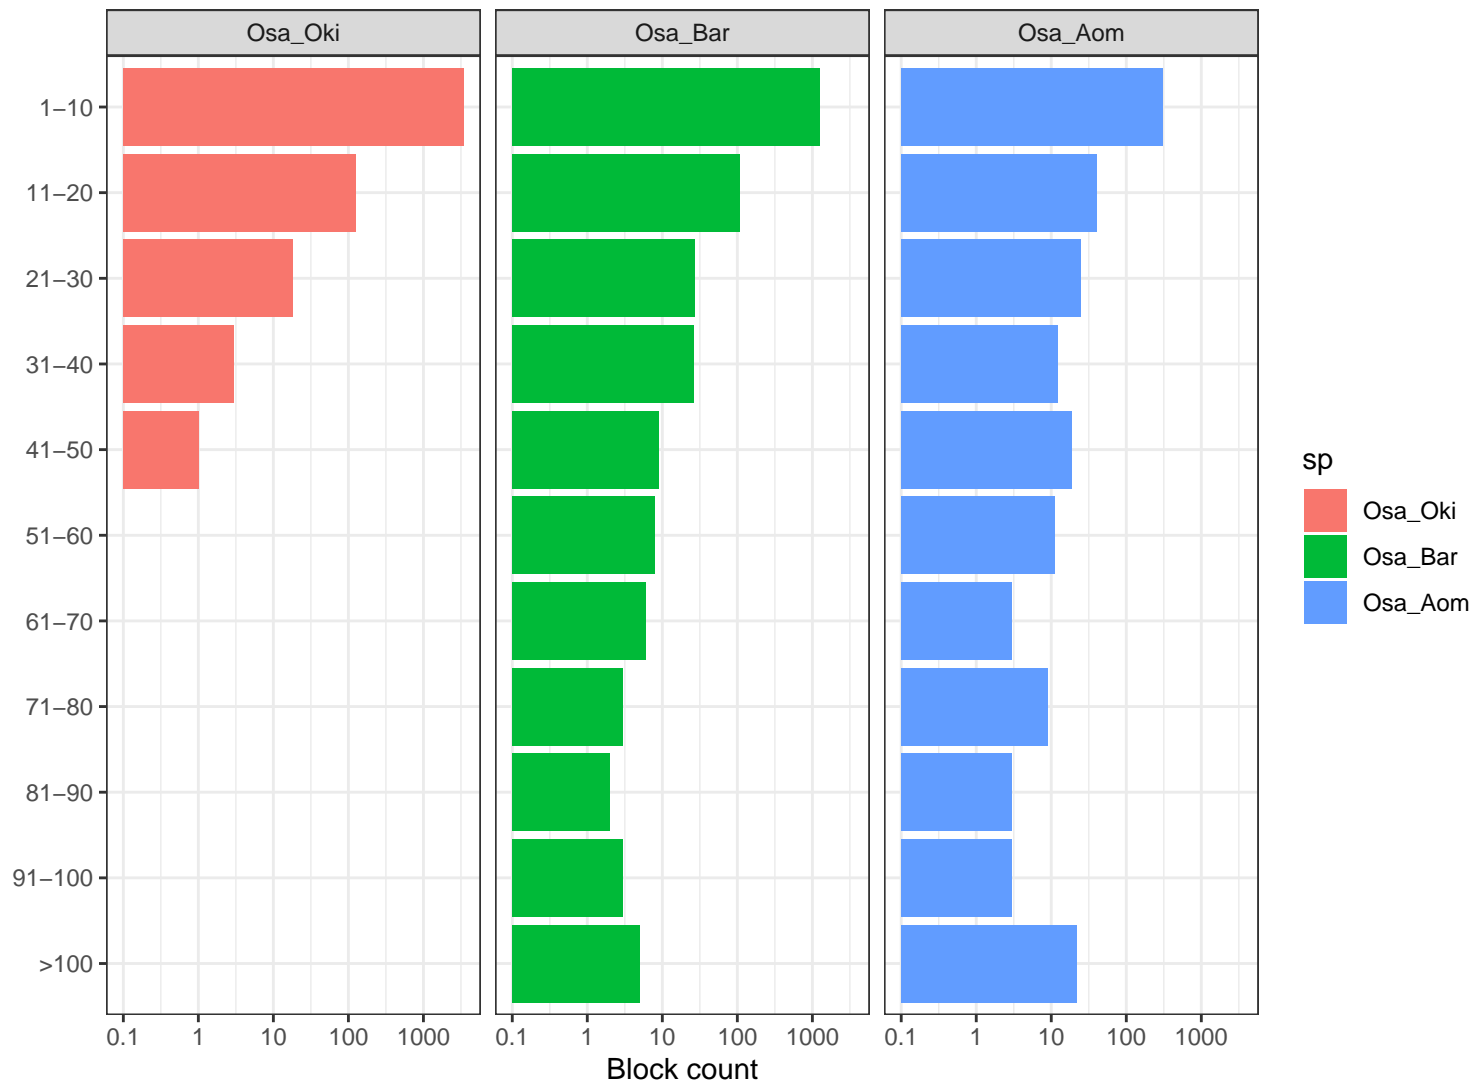

Supplement: Supplemental_Data.zip [file synteny_block_histograms_3-5.pdf › Supplemental_Data/articles/OrthogroupSyntenies_files/figure-html/synteny_block_histograms_3-5.pdf]

# Number of genes in syntenic blocks

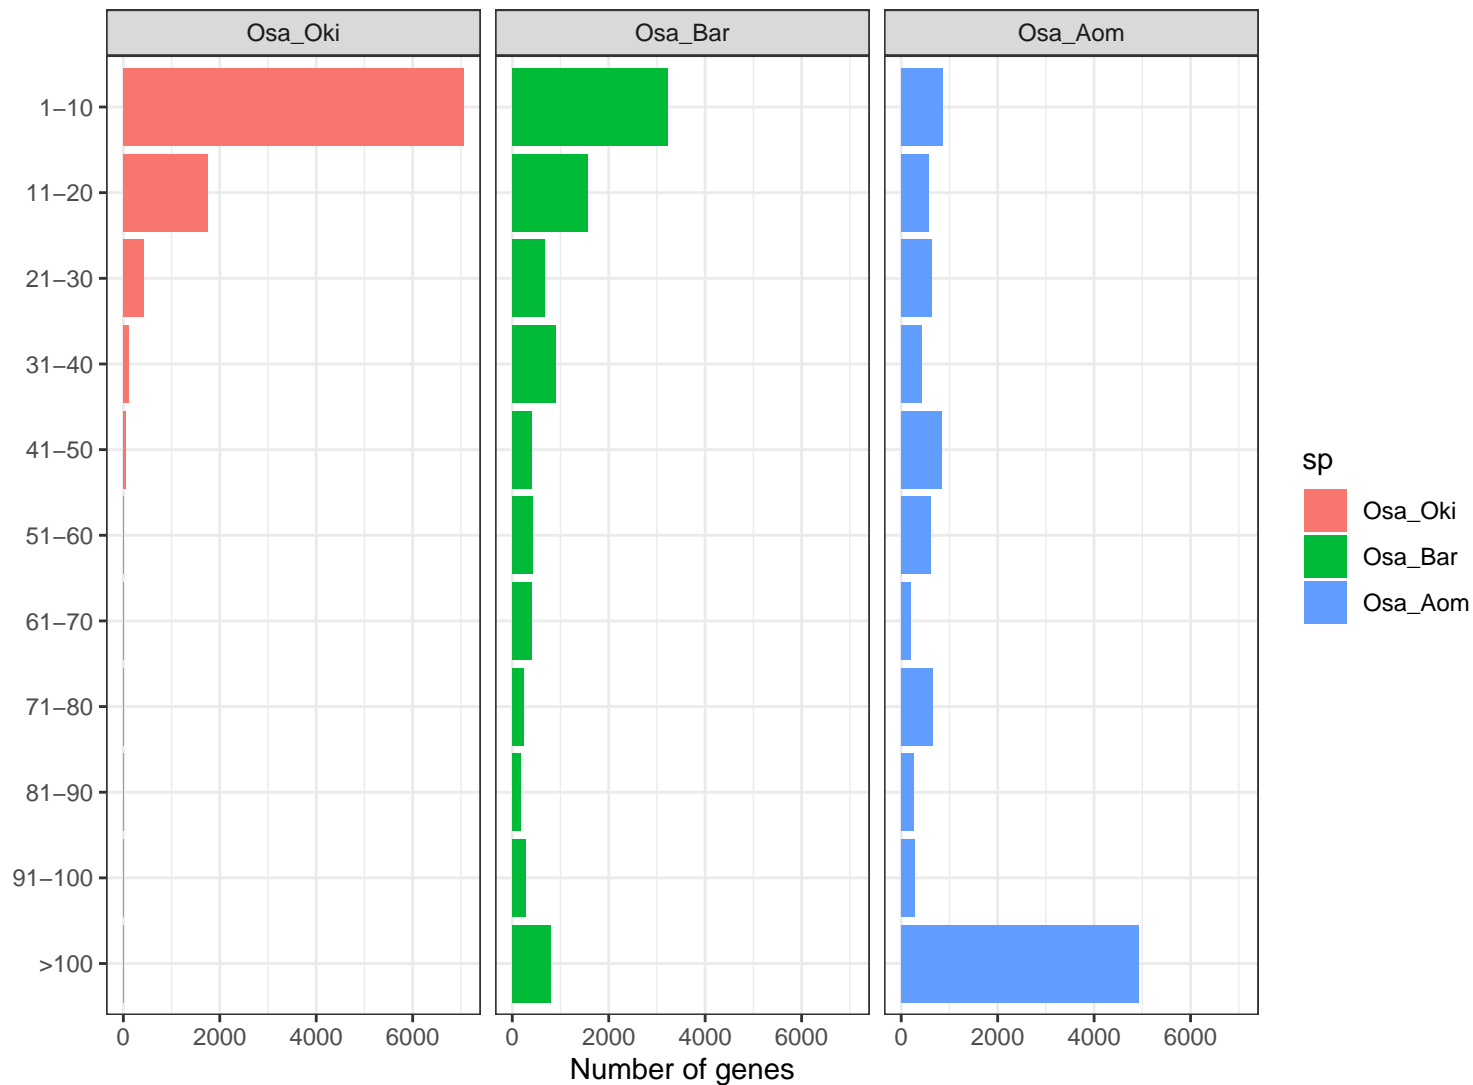

Supplement: Supplemental_Data.zip [file synteny_block_histograms_3-6.pdf › Supplemental_Data/articles/OrthogroupSyntenies_files/figure-html/synteny_block_histograms_3-6.pdf]

Rank–abundance of synteny blocks by number of genes

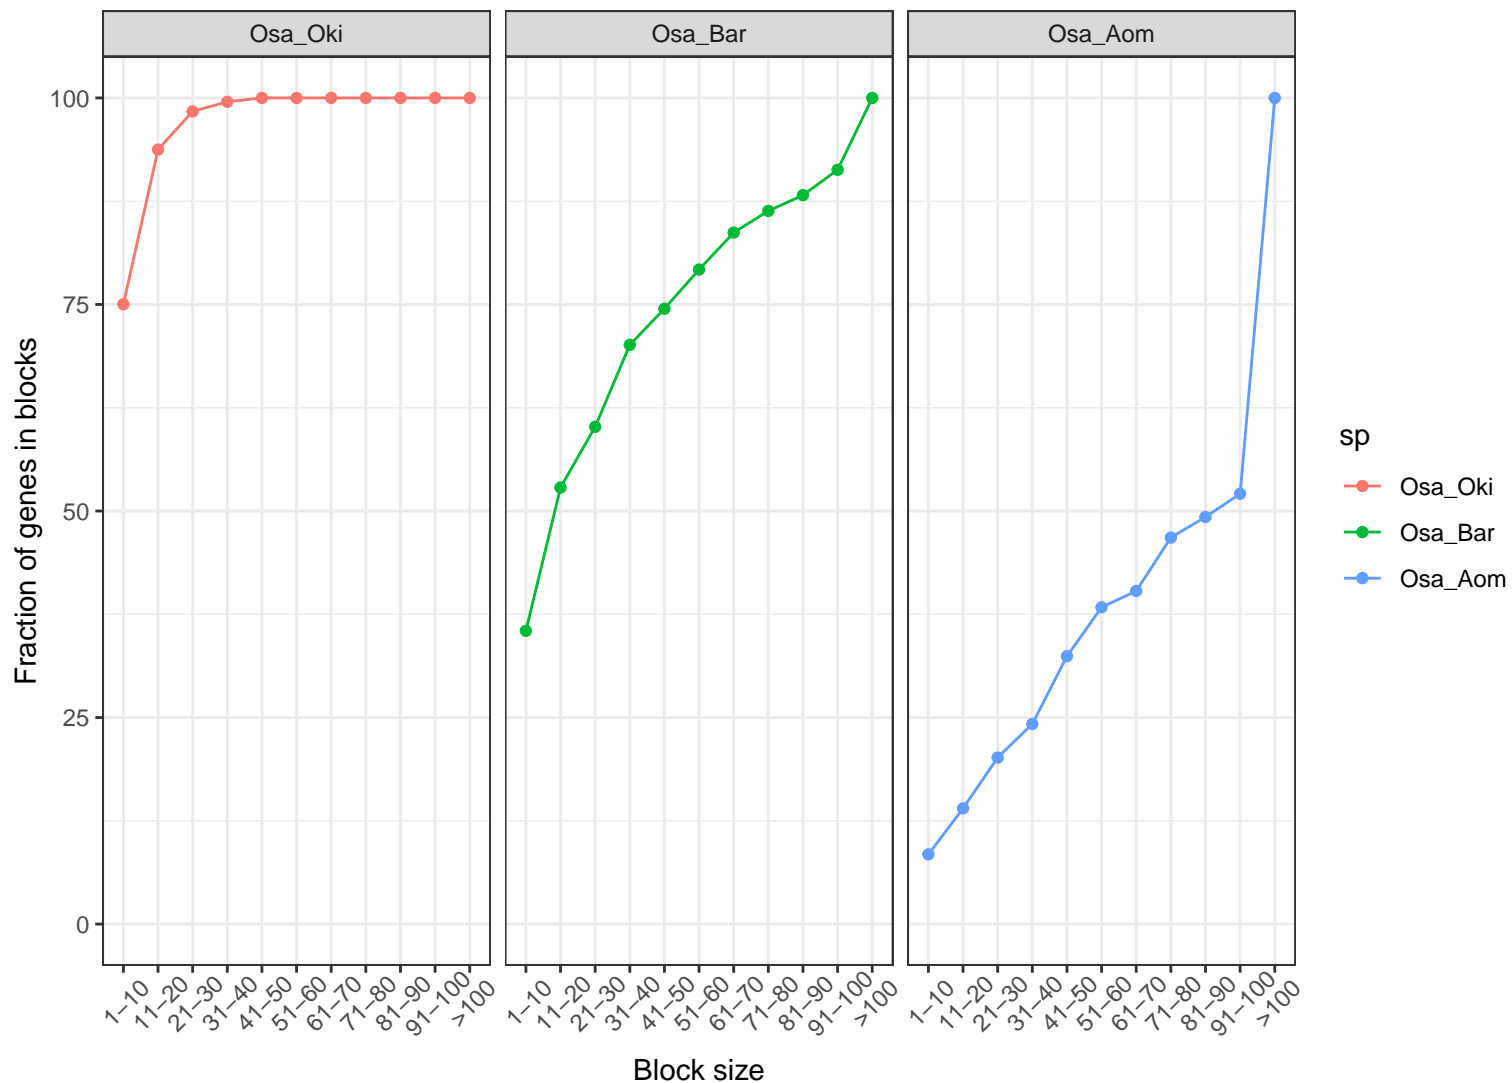

Supplement: Supplemental_Data.zip [file synteny_block_histograms_3-7.pdf › Supplemental_Data/articles/OrthogroupSyntenies_files/figure-html/synteny_block_histograms_3-7.pdf]

Bar2.p4 vs OdB3 macrosynteny plot

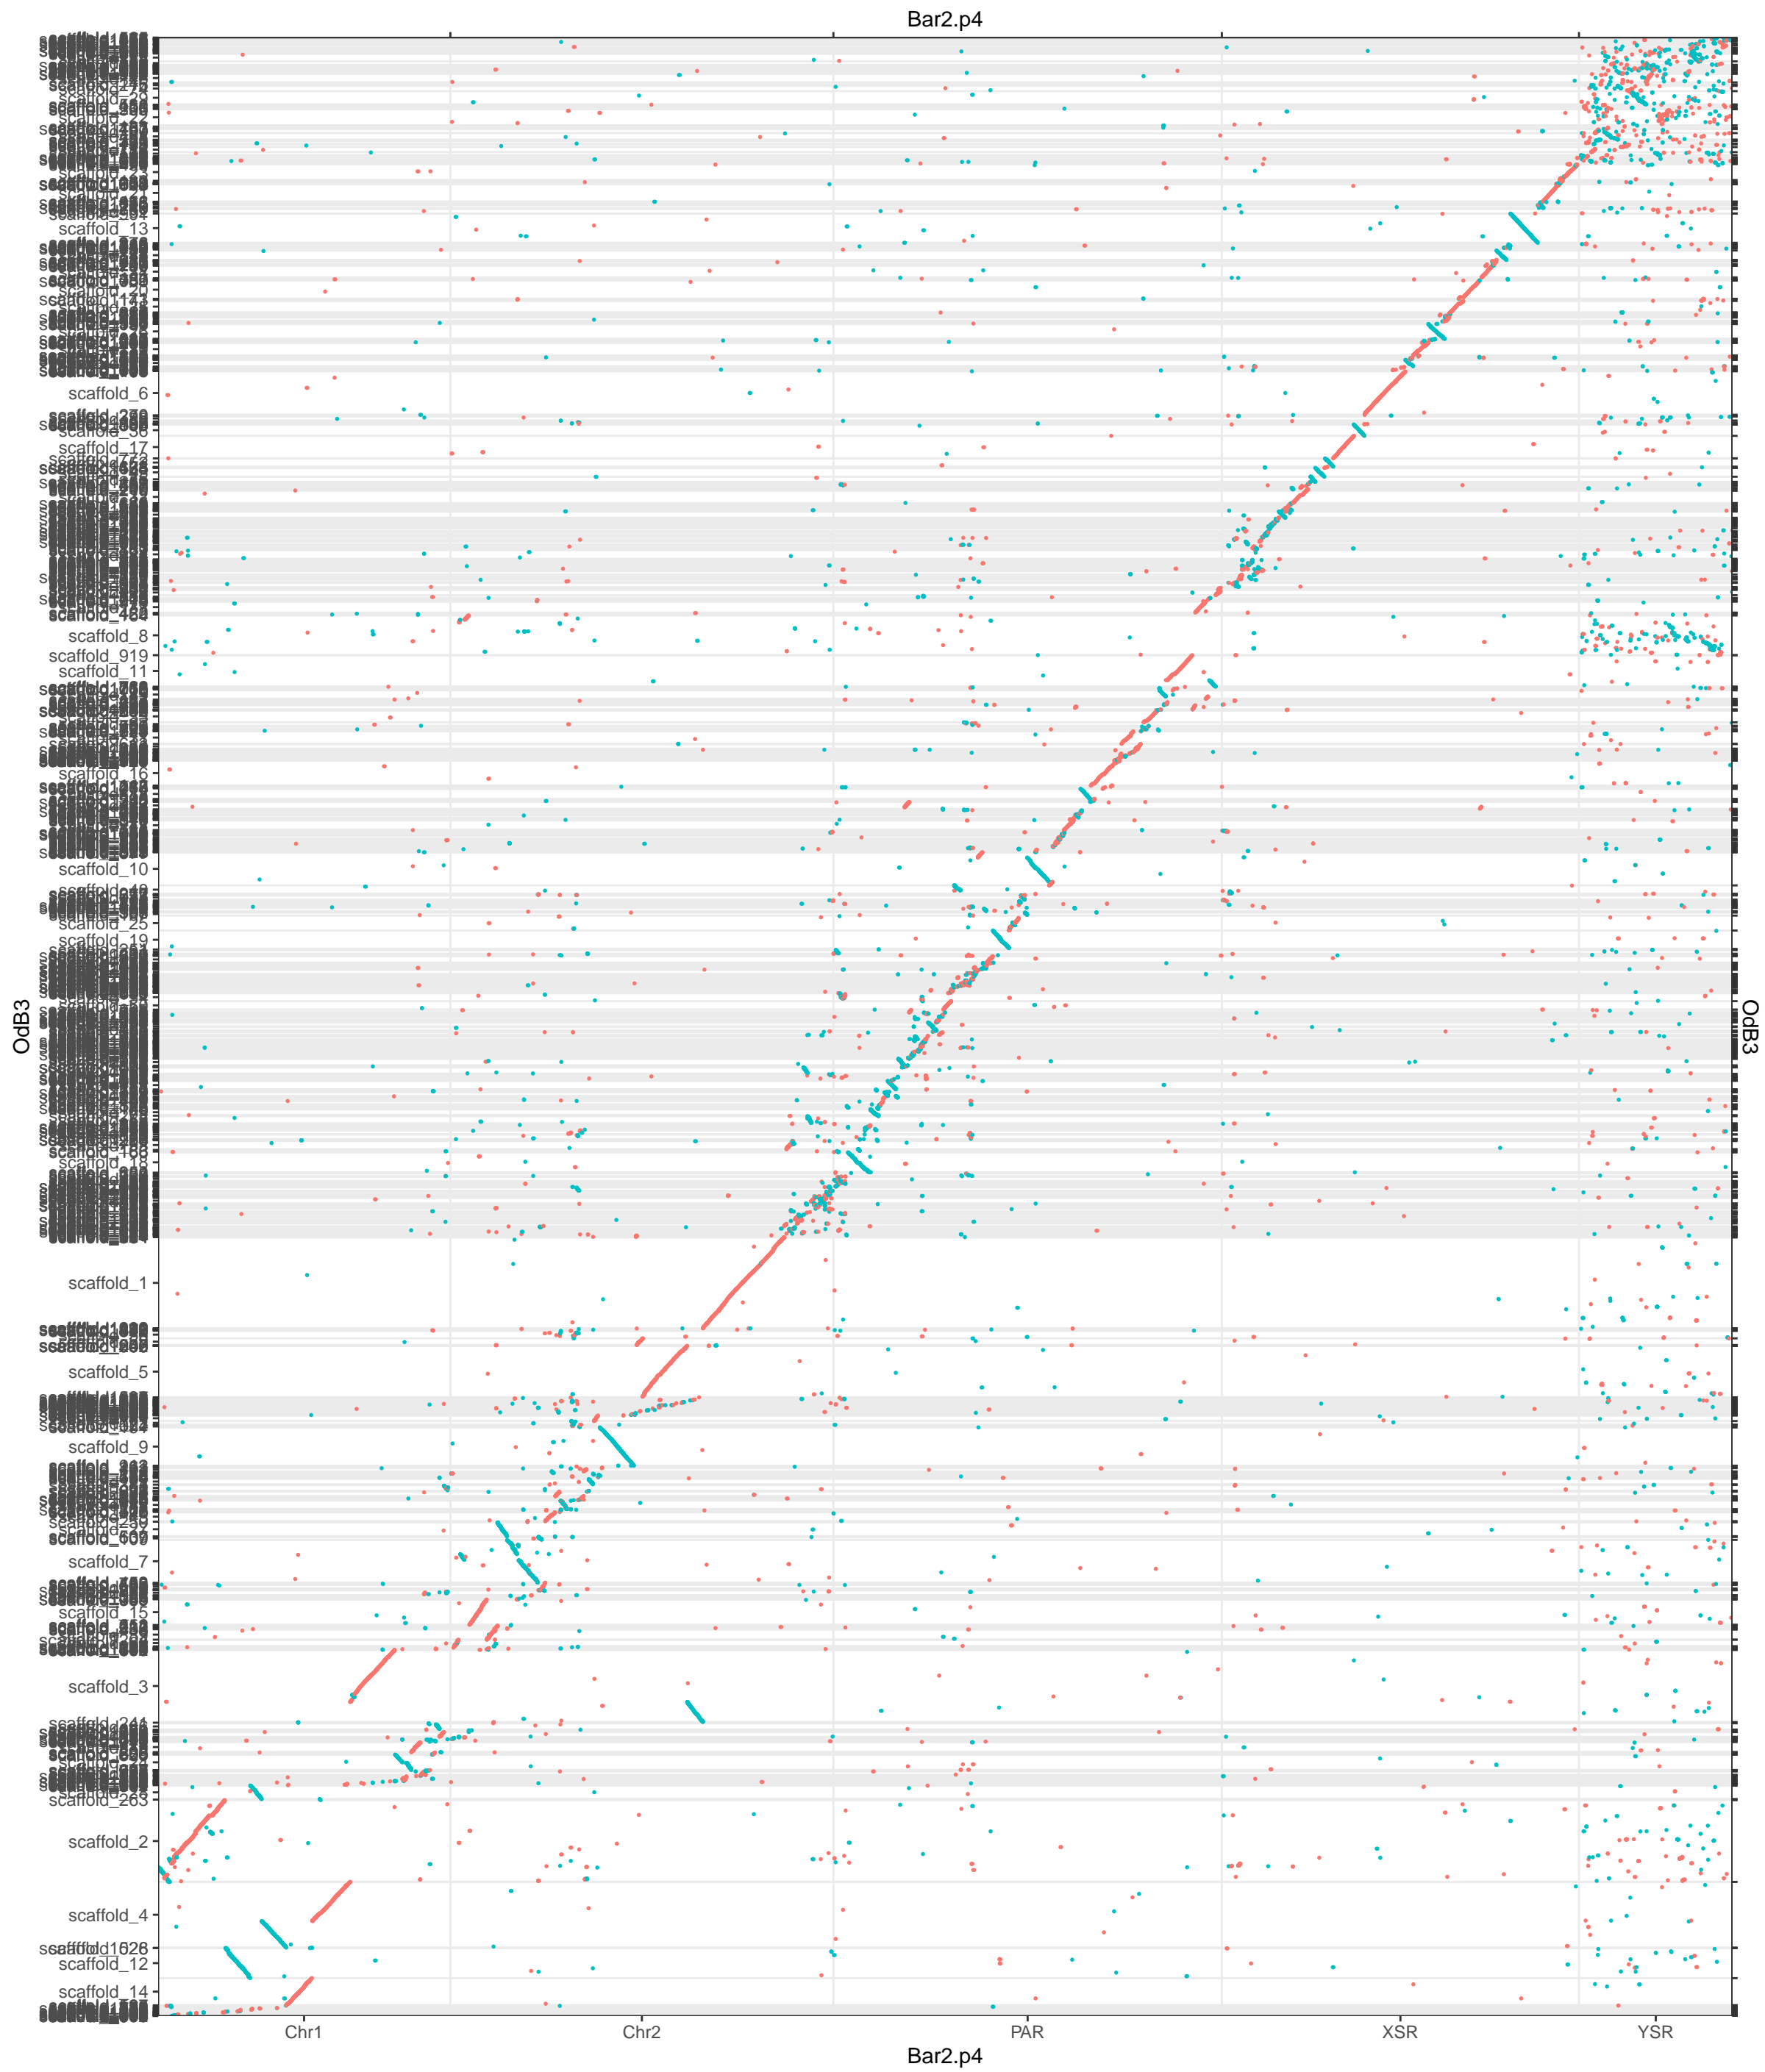

Supplement: Supplemental_Data.zip [file Bar_Nor-1.pdf › Supplemental_Data/articles/OxfordPlots_files/figure-html/Bar_Nor-1.pdf]

Bar2.p4 vs OKI2018.l69 macrosynteny plot

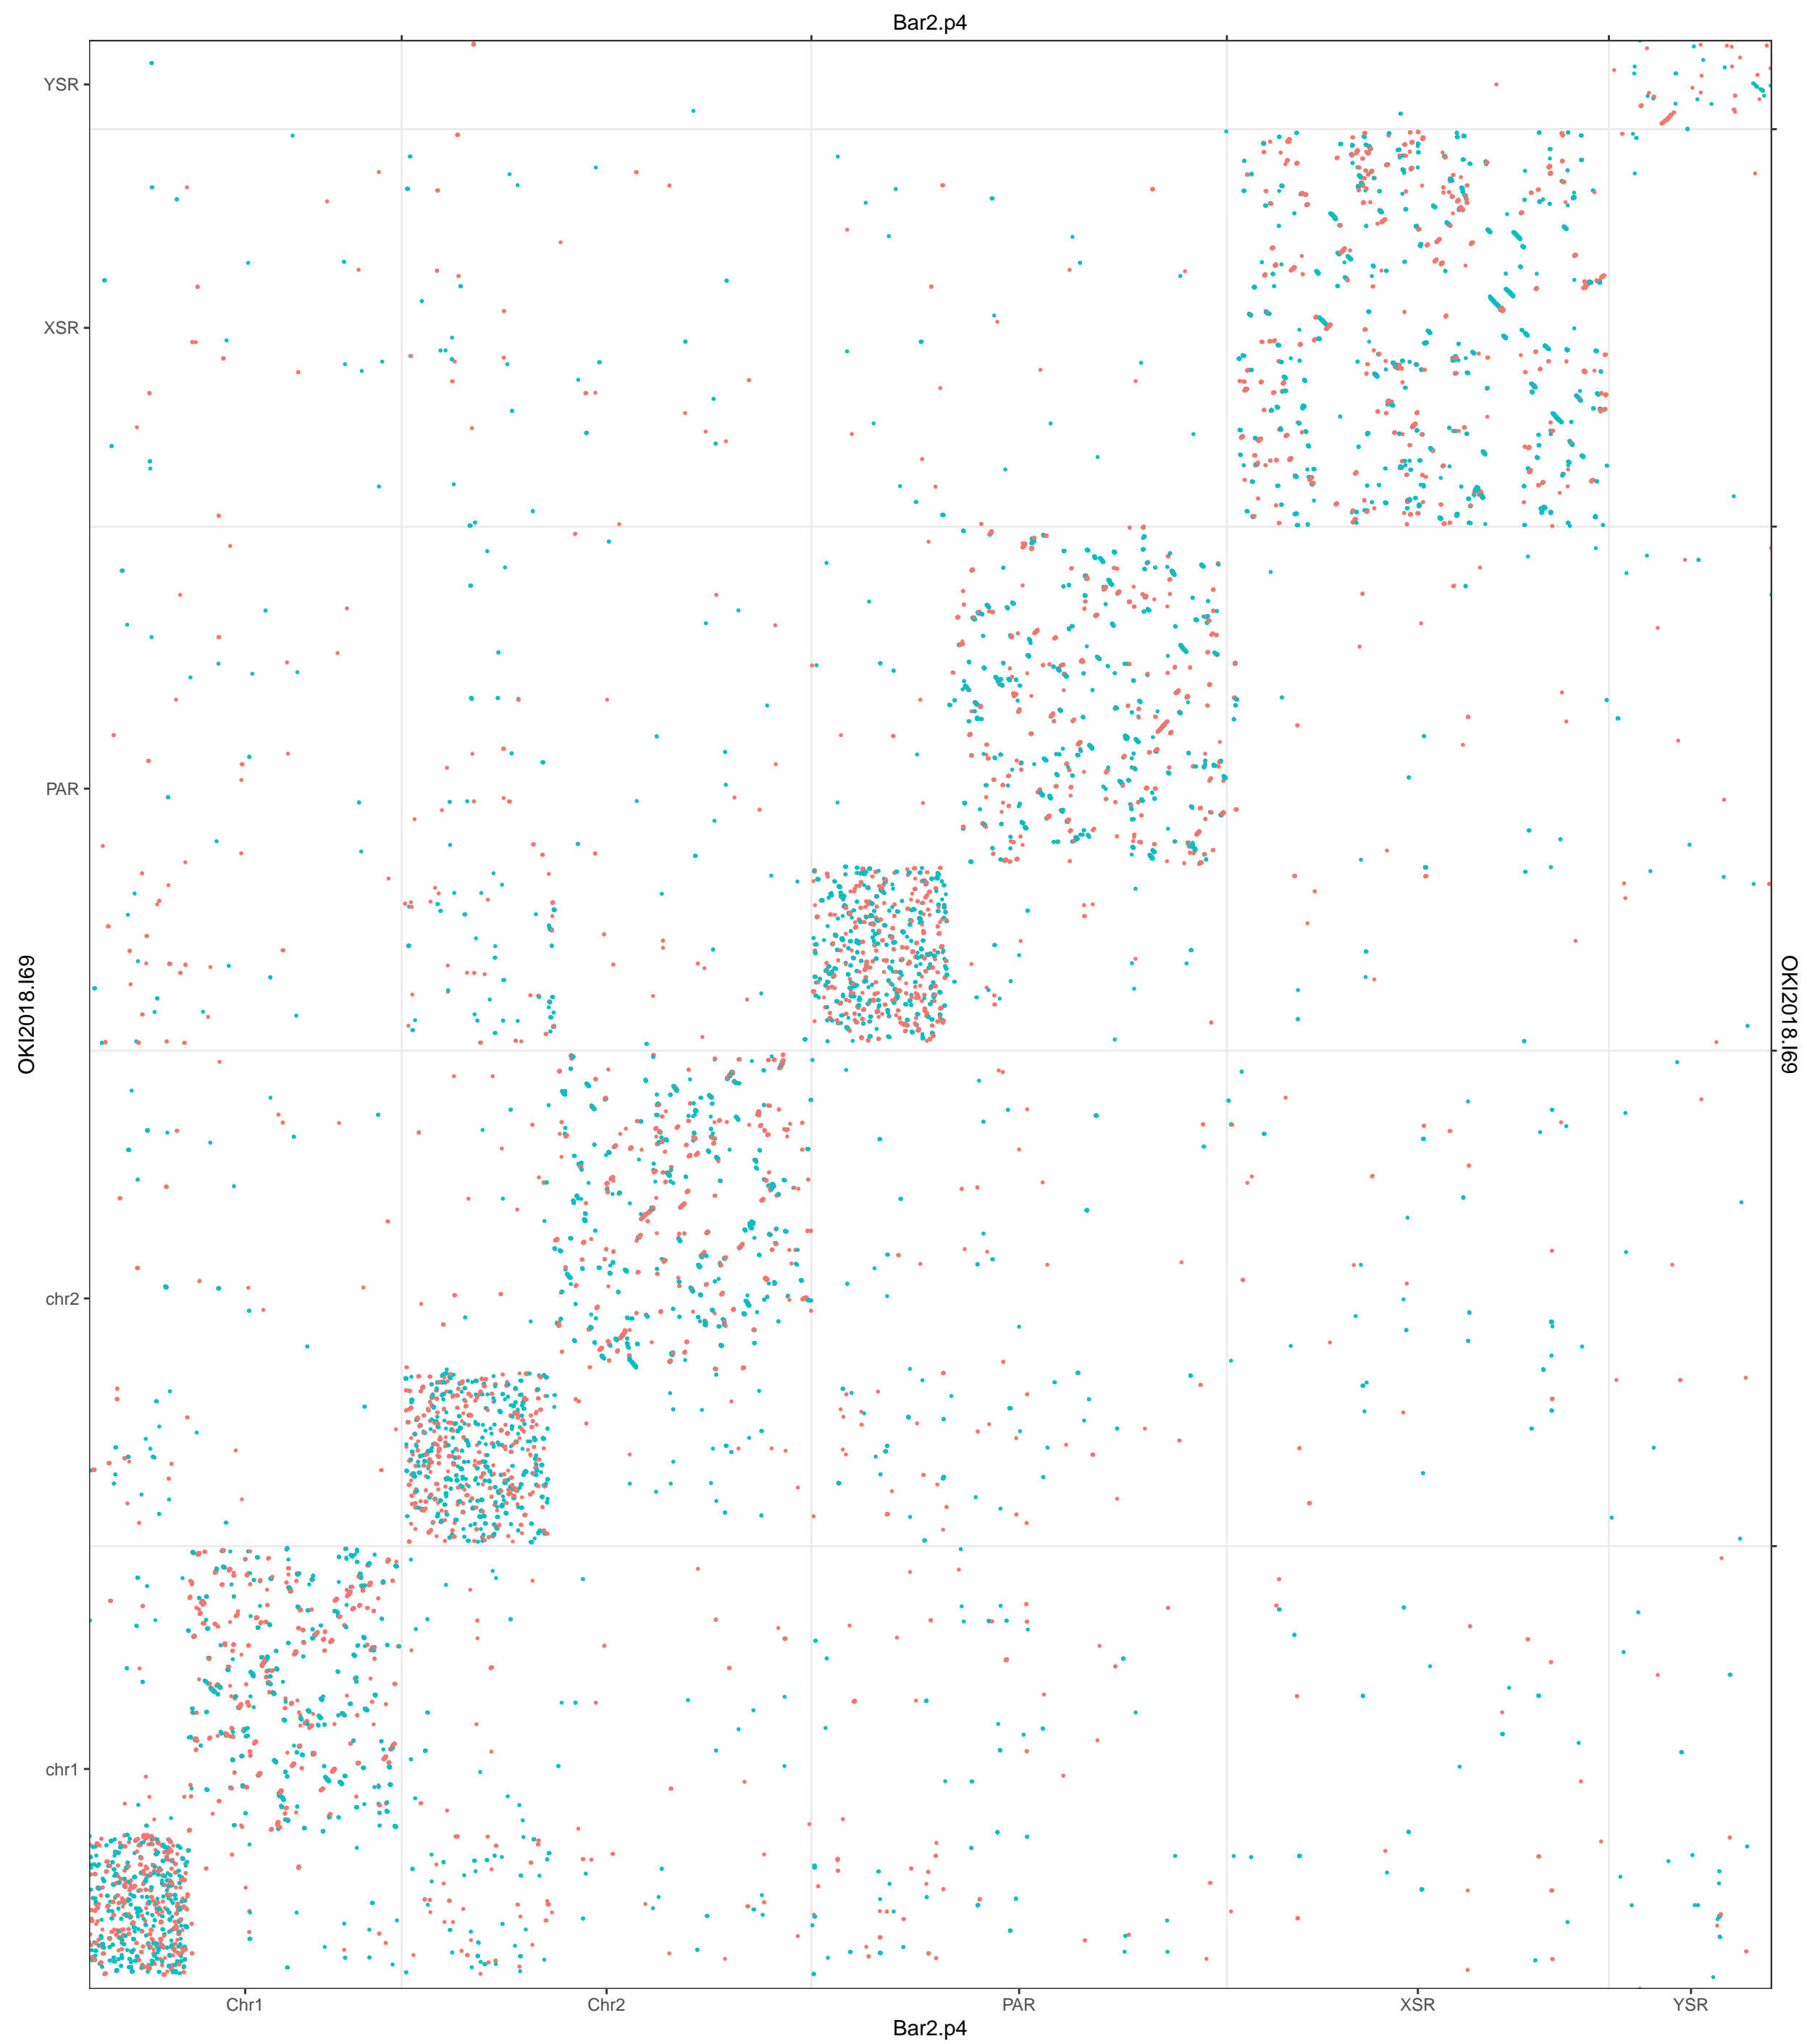

Supplement: Supplemental_Data.zip [file Bar_Oki-1.pdf › Supplemental_Data/articles/OxfordPlots_files/figure-html/Bar_Oki-1.pdf]

Bar2.p4 vs OSKA2016v1.9 macrosynteny plot

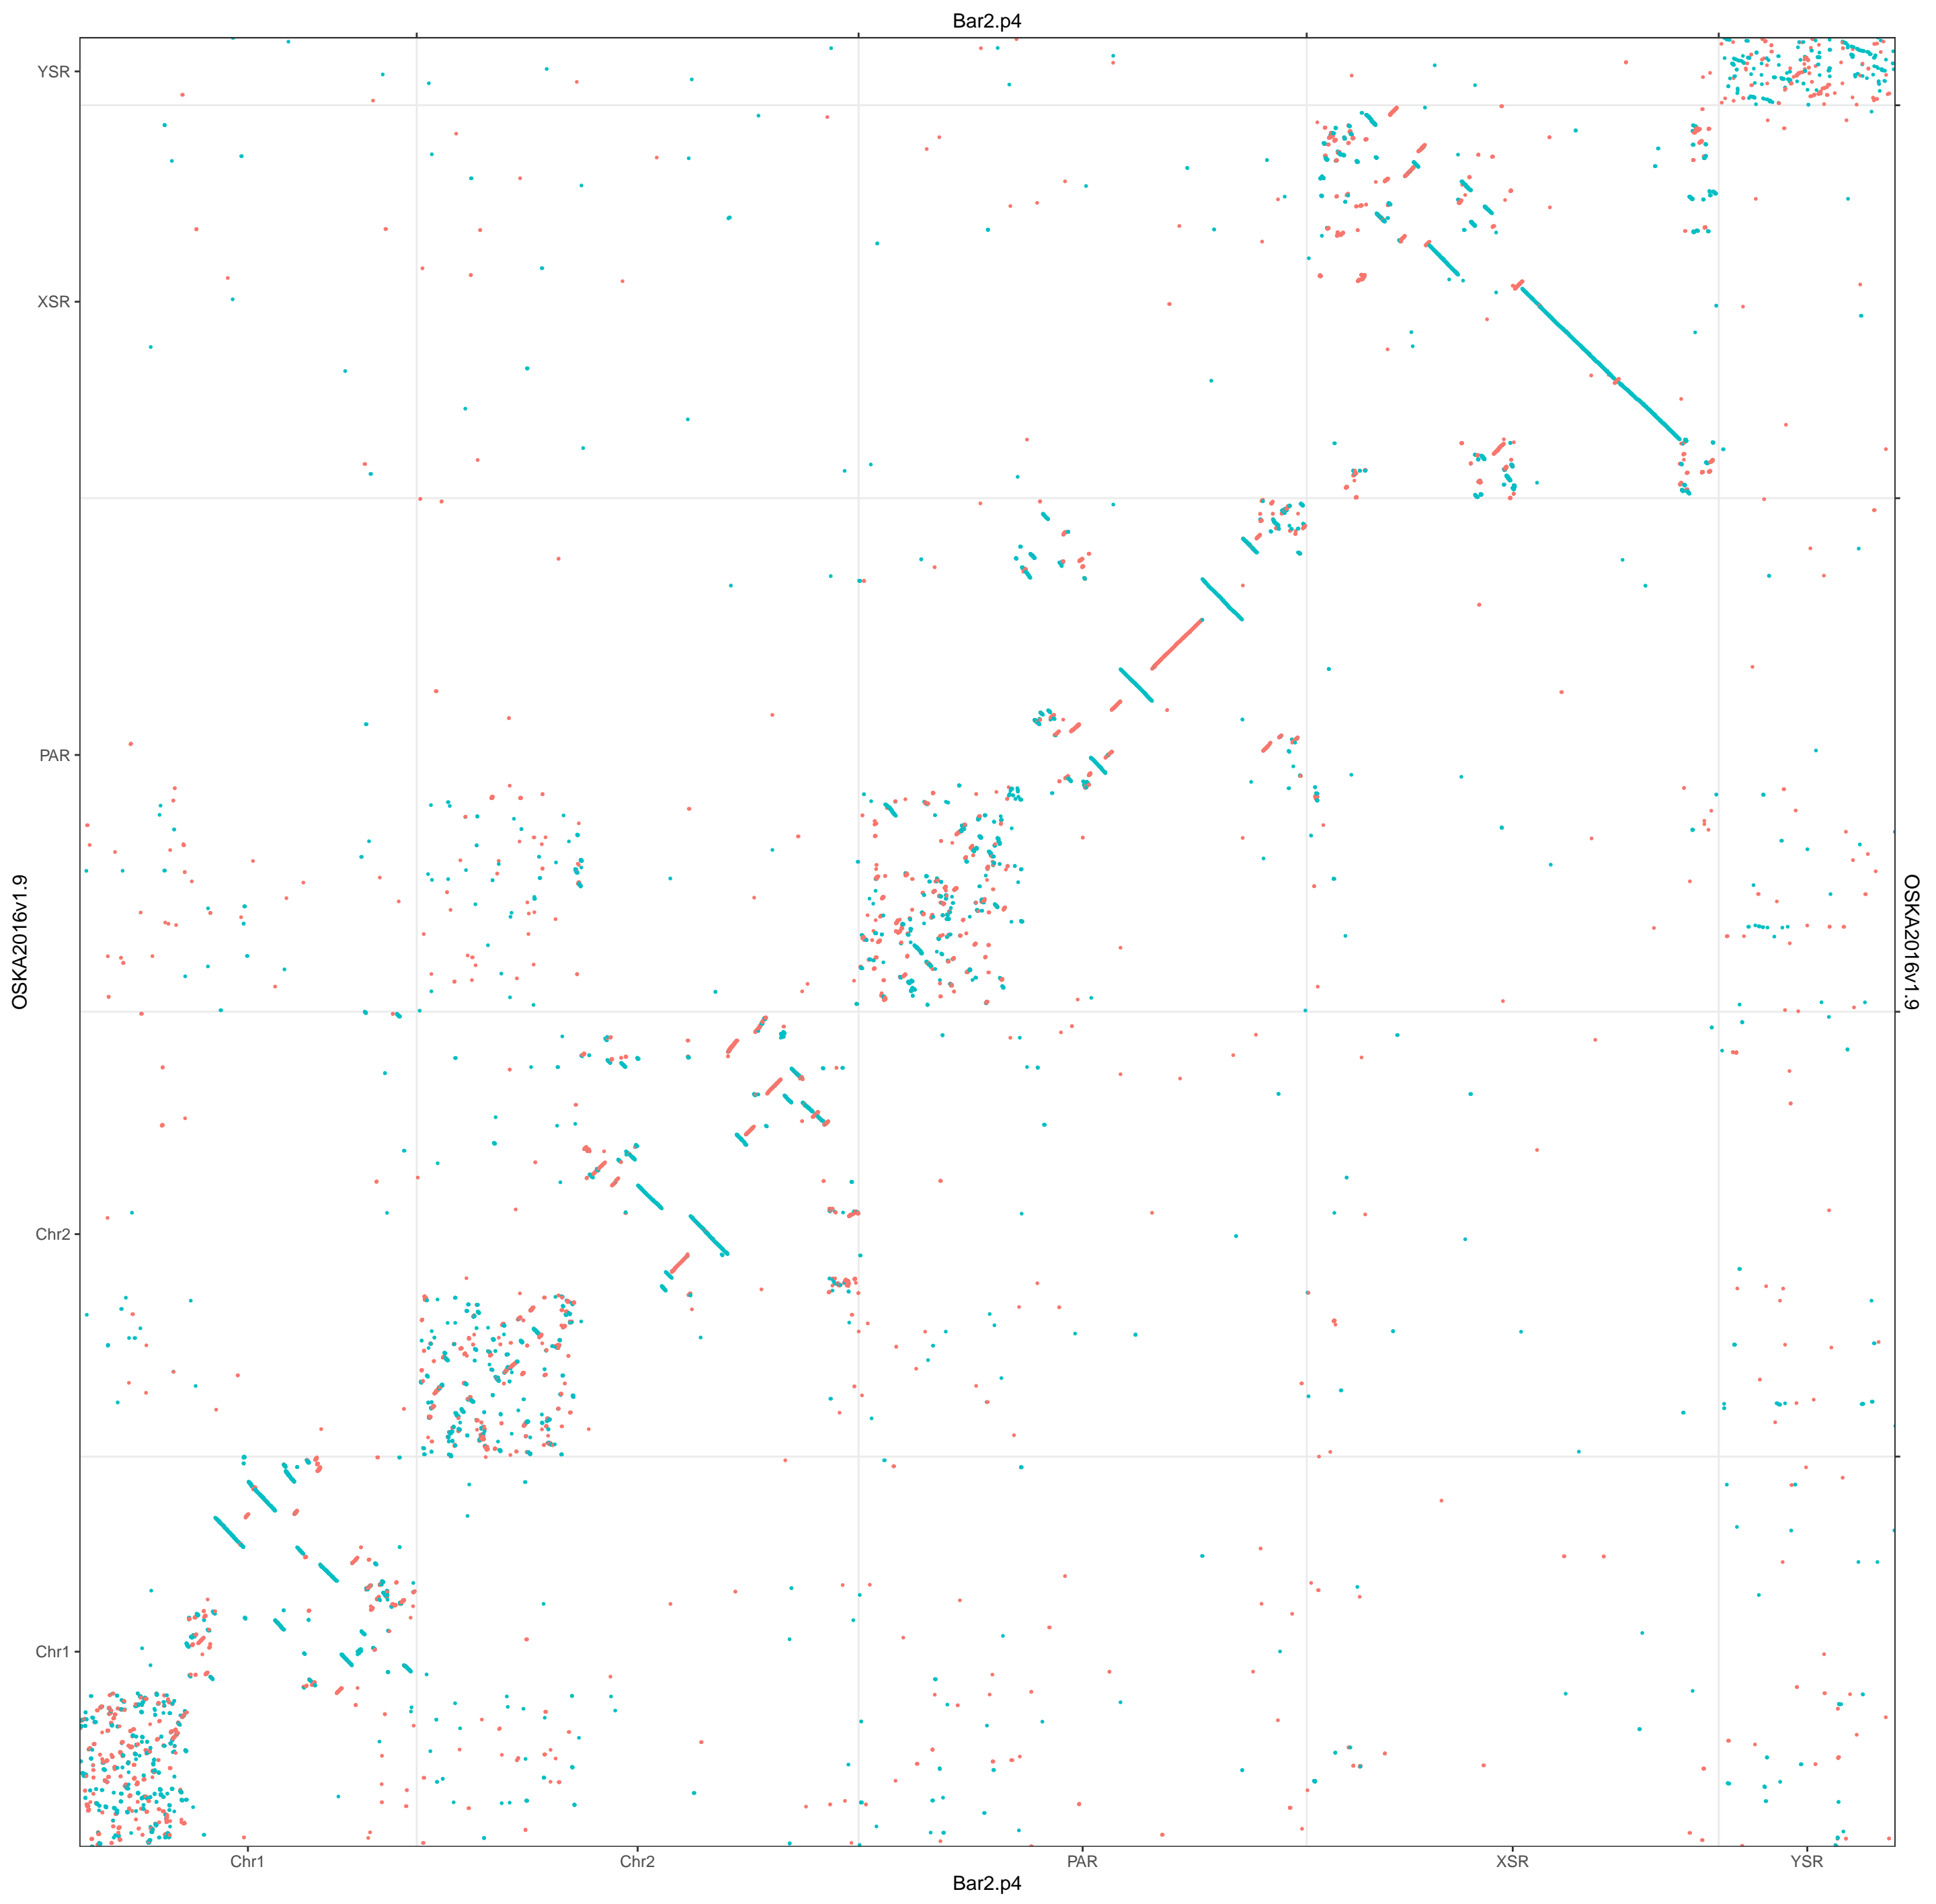

Supplement: Supplemental_Data.zip [file Bar_Osa-1.pdf › Supplemental_Data/articles/OxfordPlots_files/figure-html/Bar_Osa-1.pdf]

C. briggsae vs C. elegans

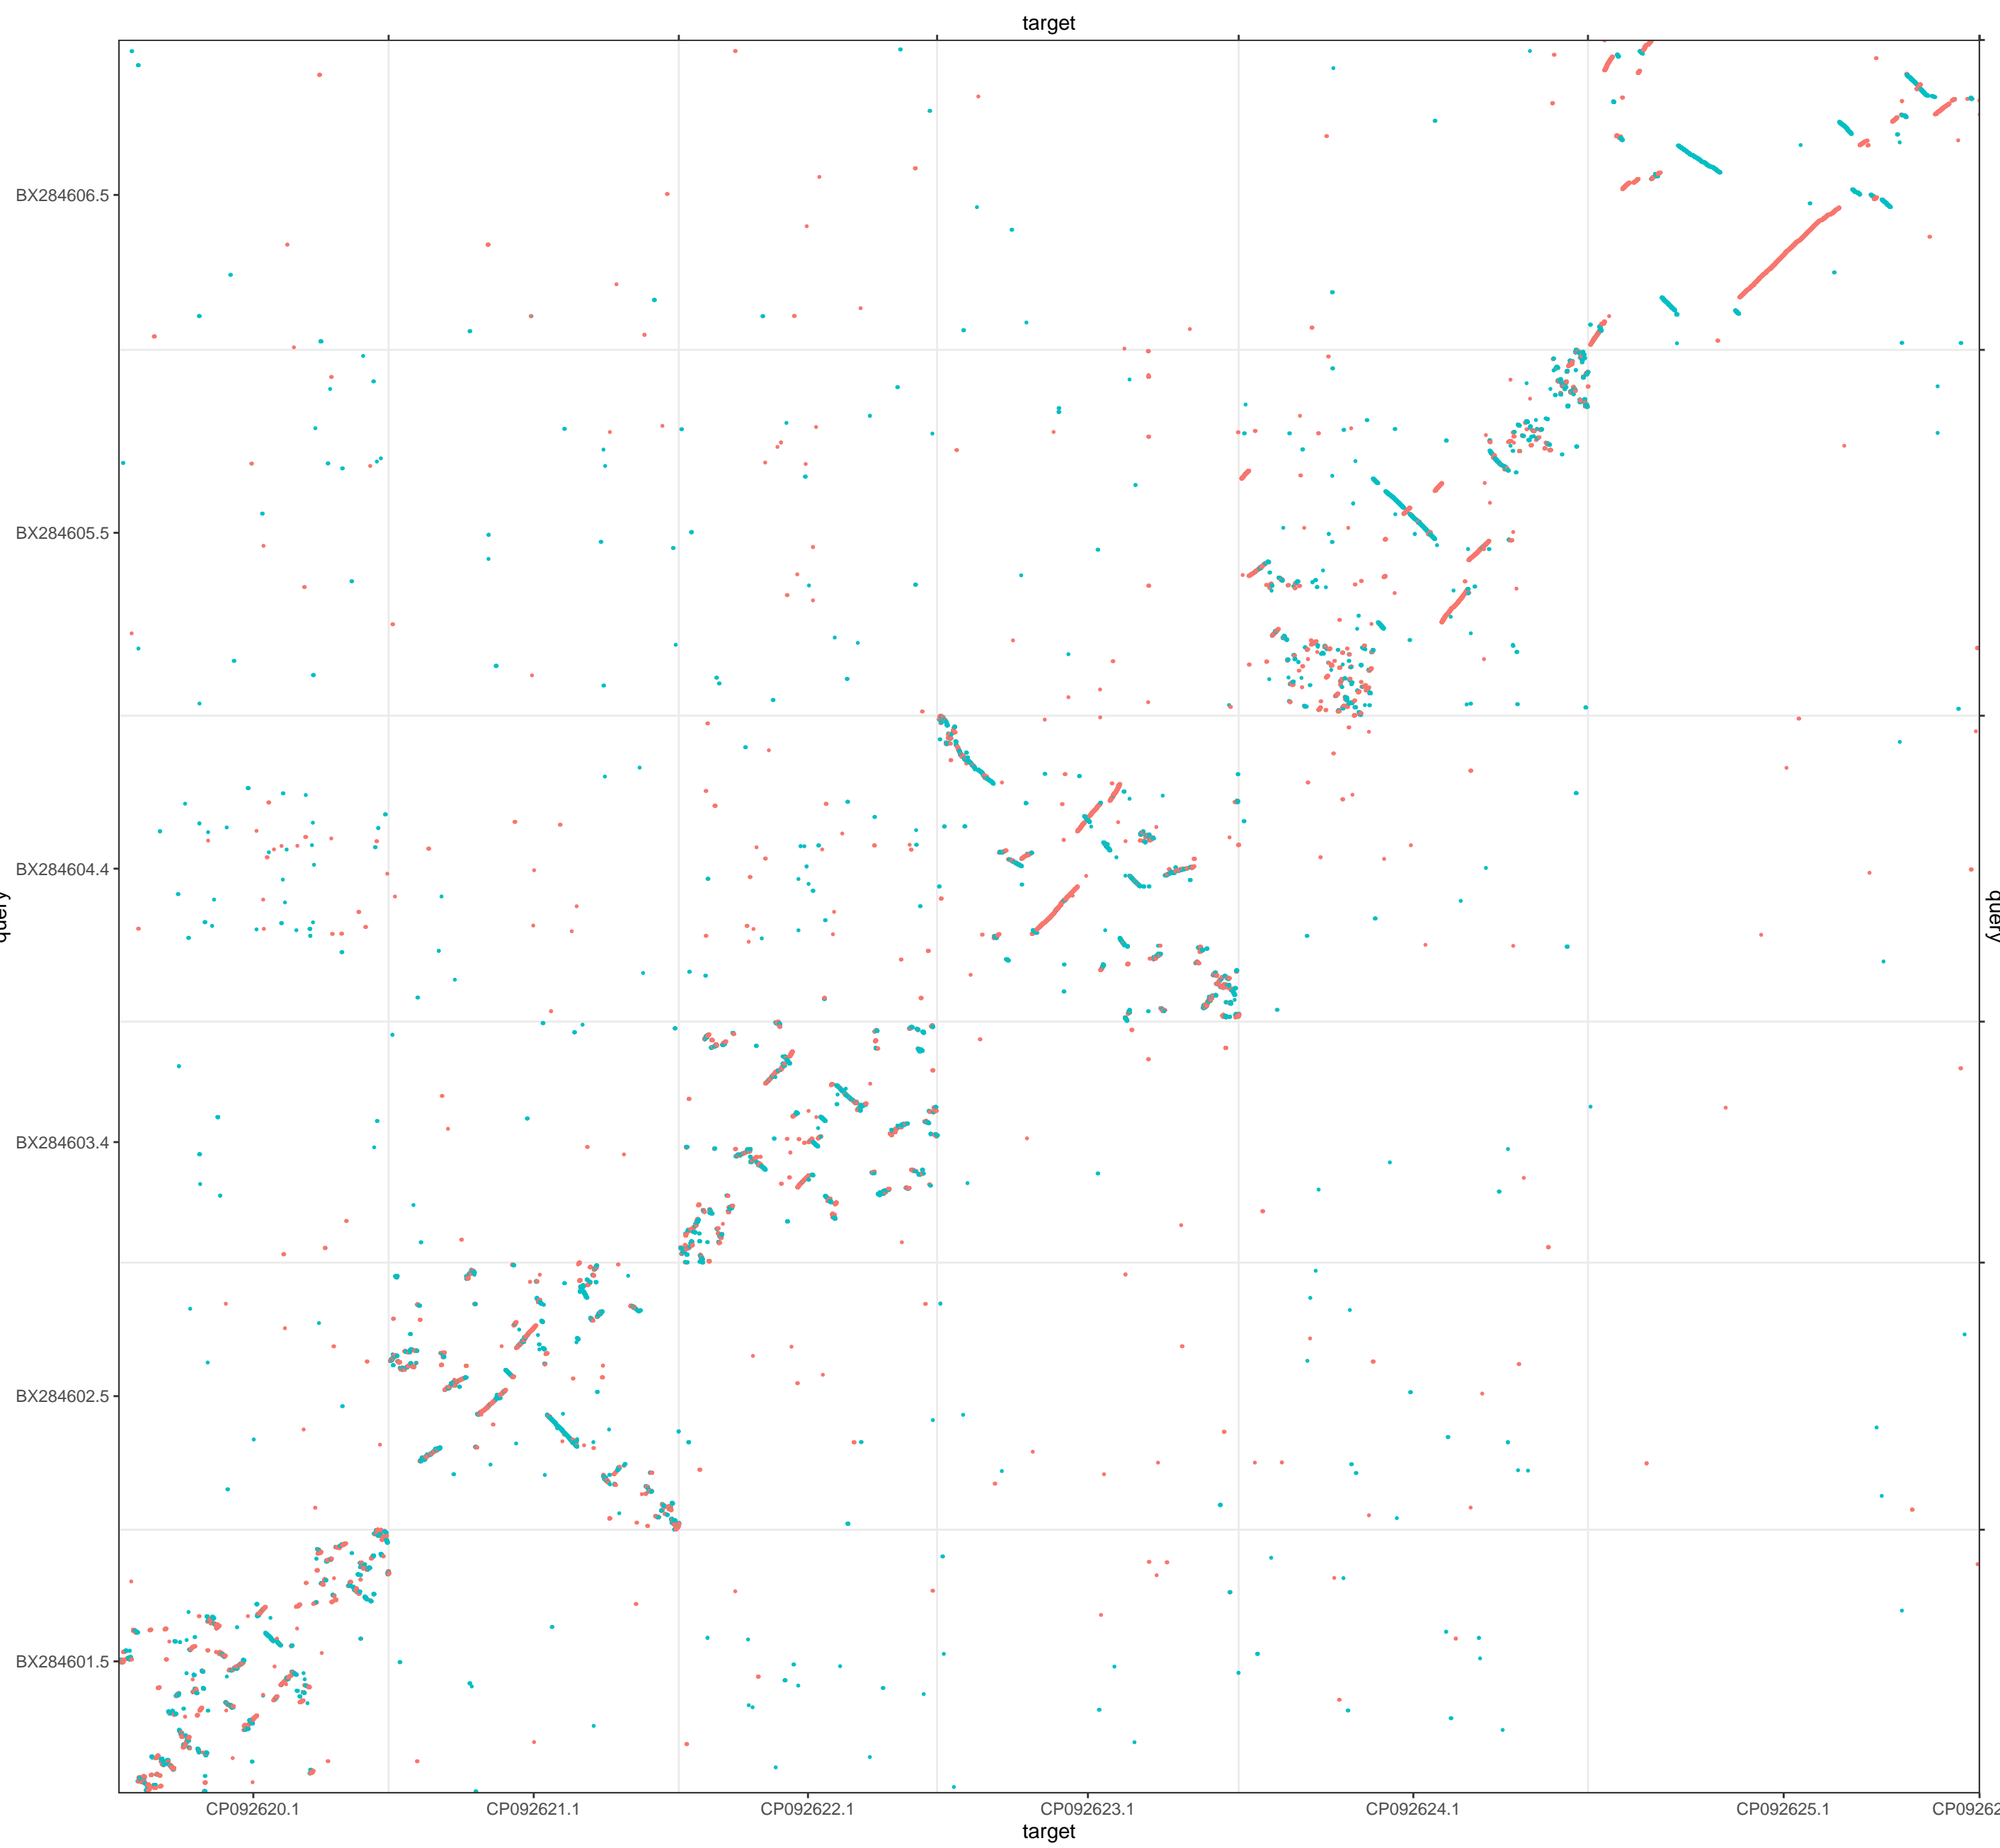

Supplement: Supplemental_Data.zip [file Cbr_Cel-1.pdf › Supplemental_Data/articles/OxfordPlots_files/figure-html/Cbr_Cel-1.pdf]

C. briggsae vs C. nigoni

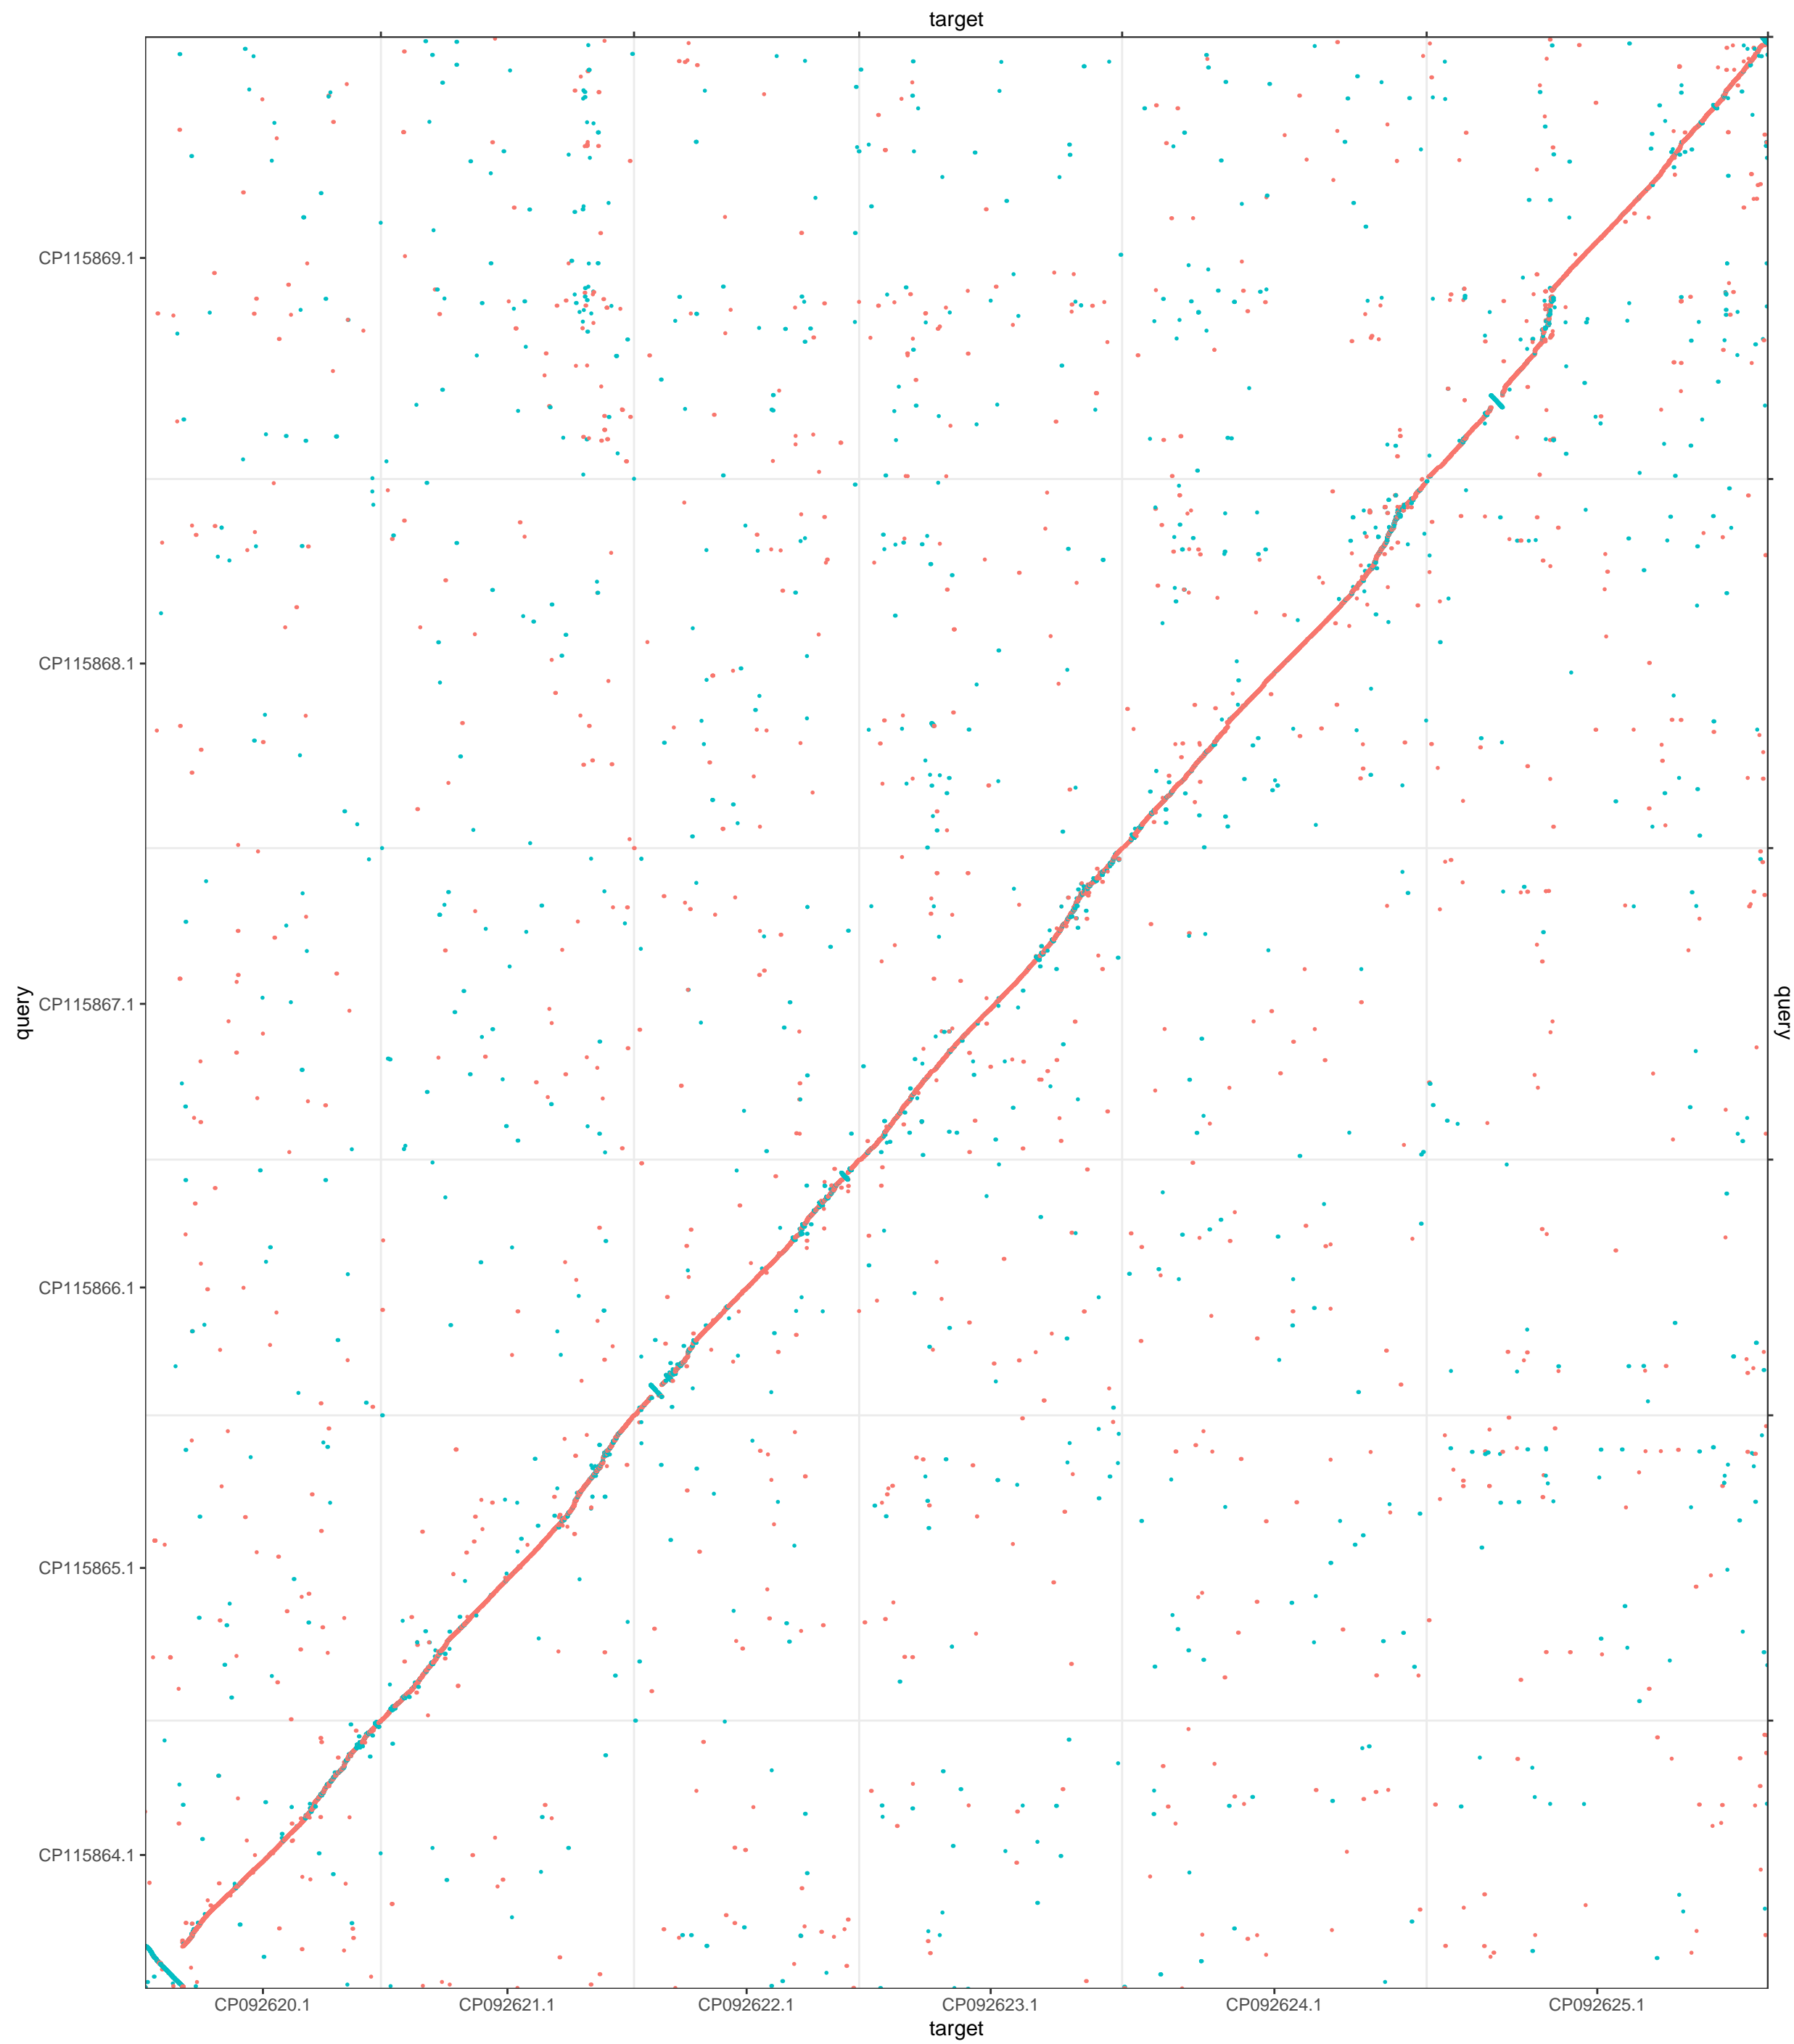

Supplement: Supplemental_Data.zip [file Cbr_Cni-1.pdf › Supplemental_Data/articles/OxfordPlots_files/figure-html/Cbr_Cni-1.pdf]

C. briggsae vs C. remanei

target

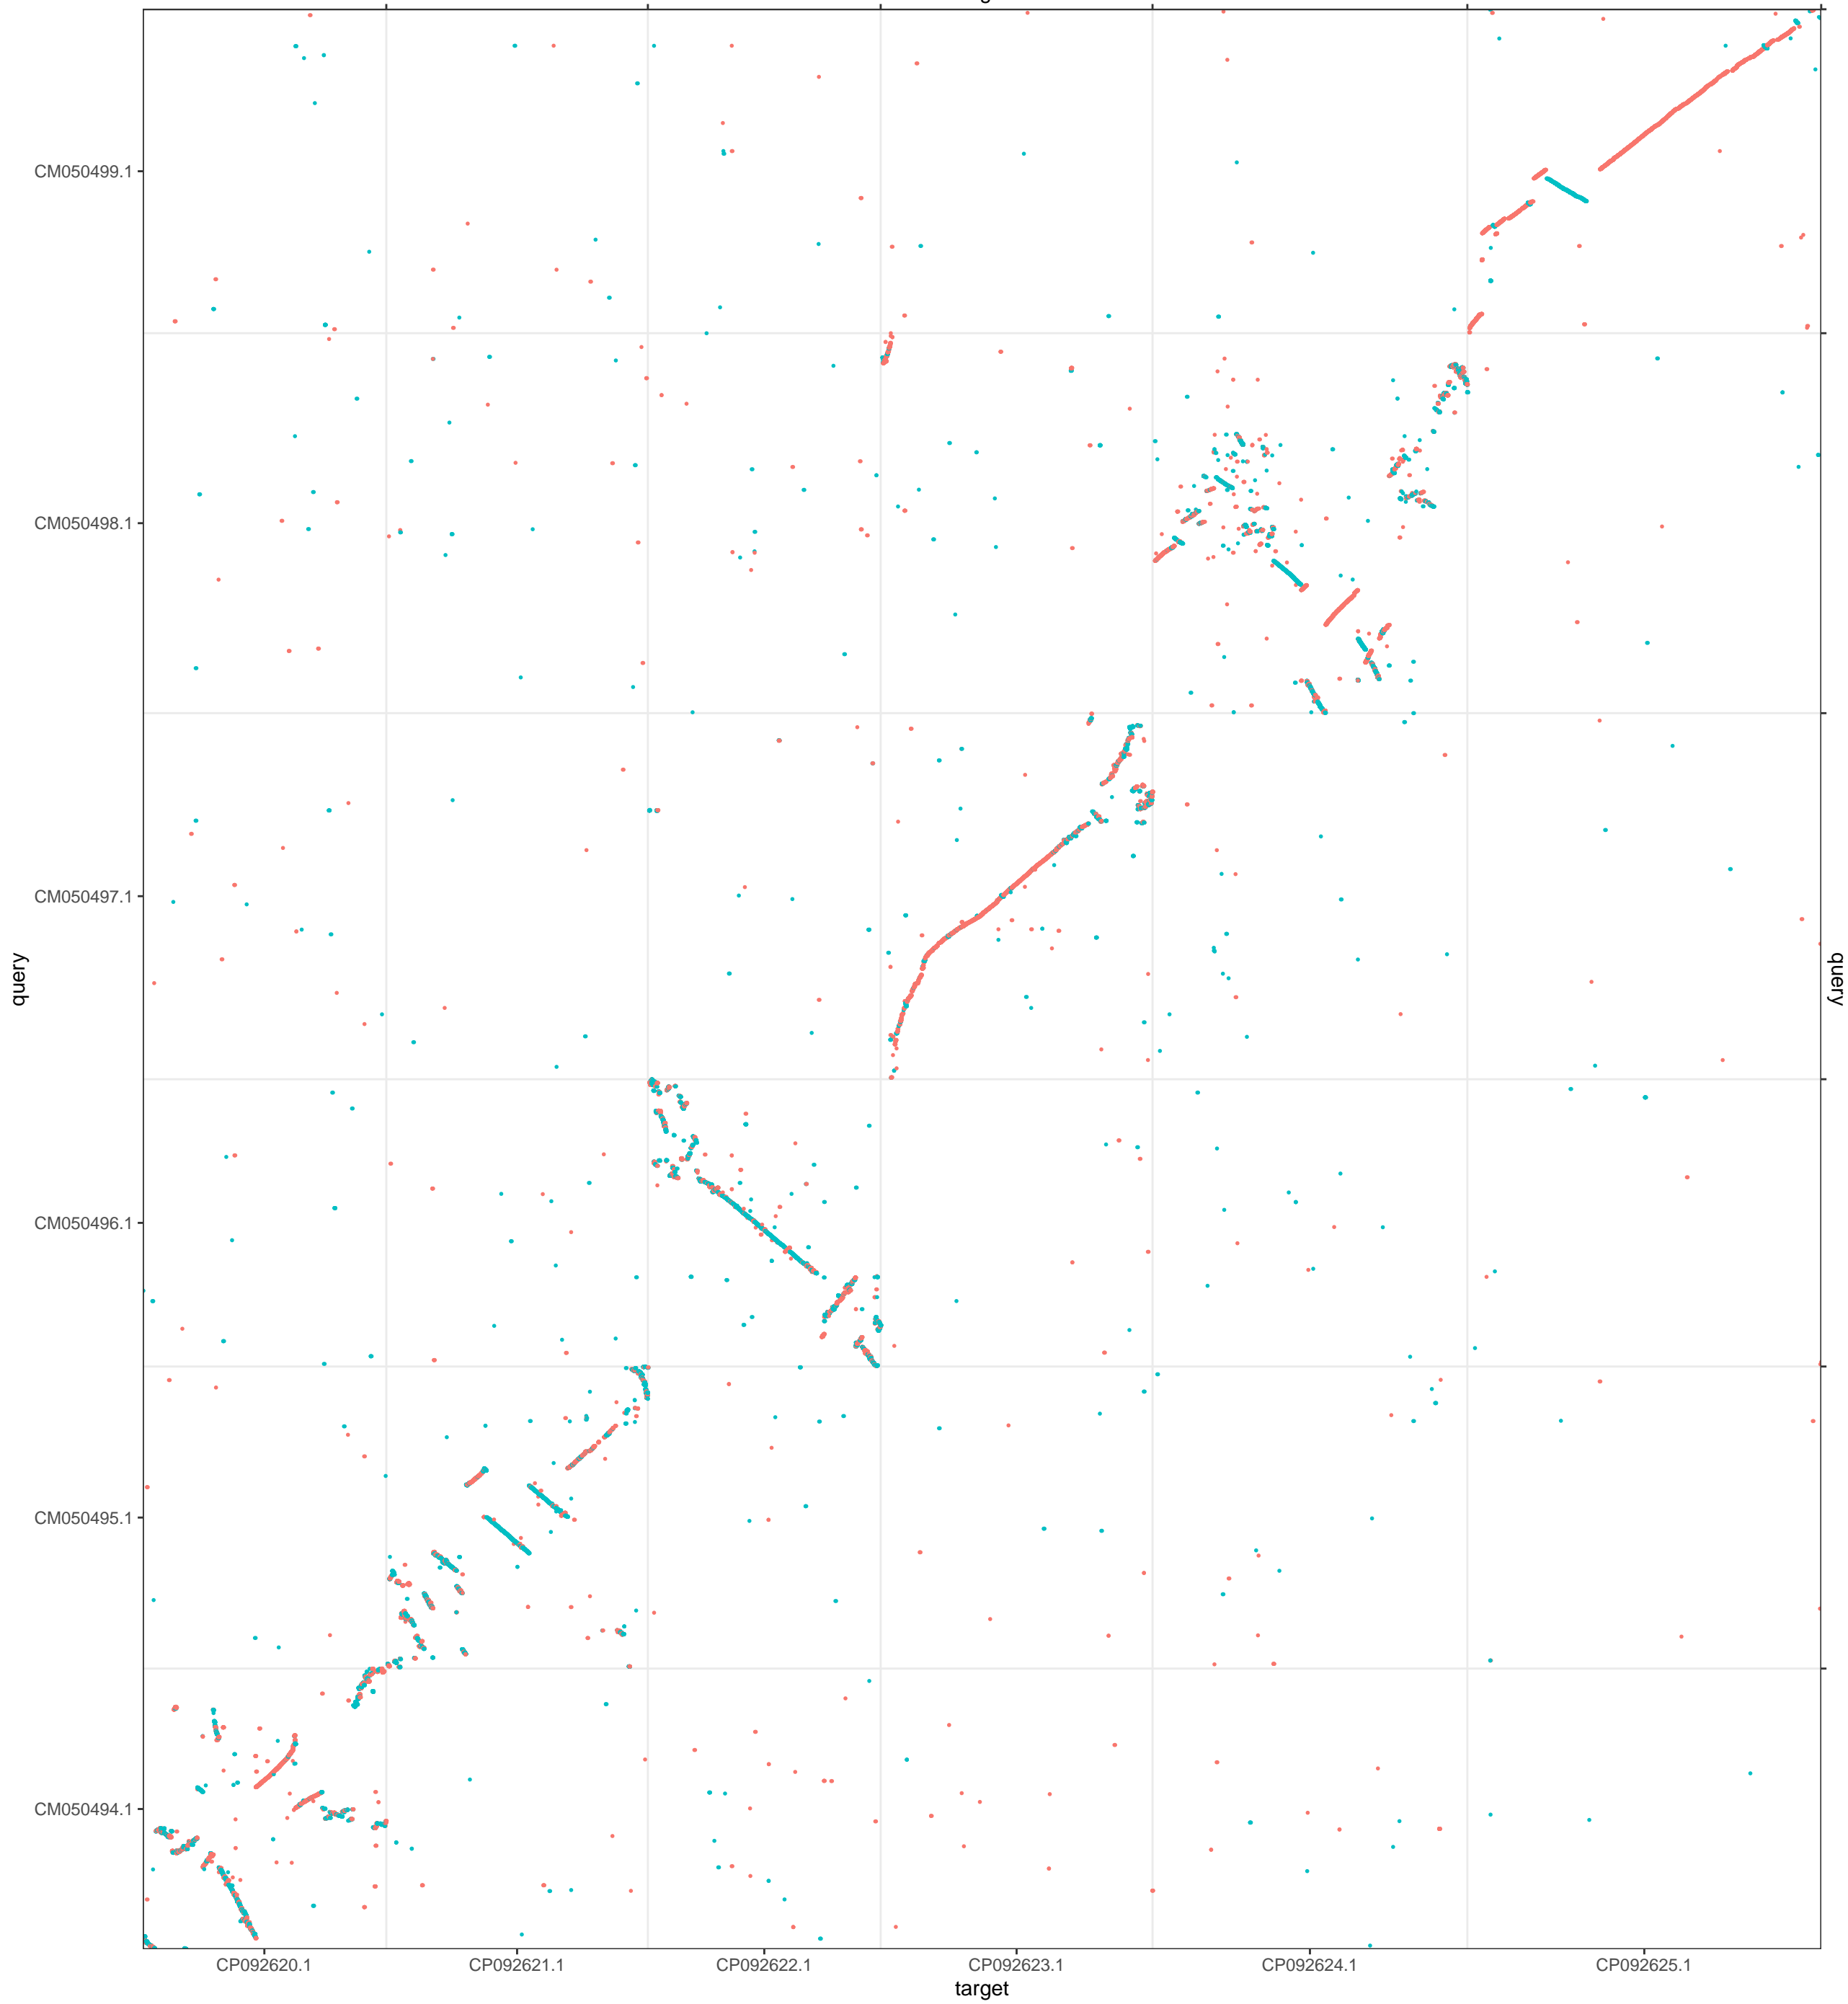

Supplement: Supplemental_Data.zip [file Cbr_Cre-1.pdf › Supplemental_Data/articles/OxfordPlots_files/figure-html/Cbr_Cre-1.pdf]

C. nigoni vs C. inopinata

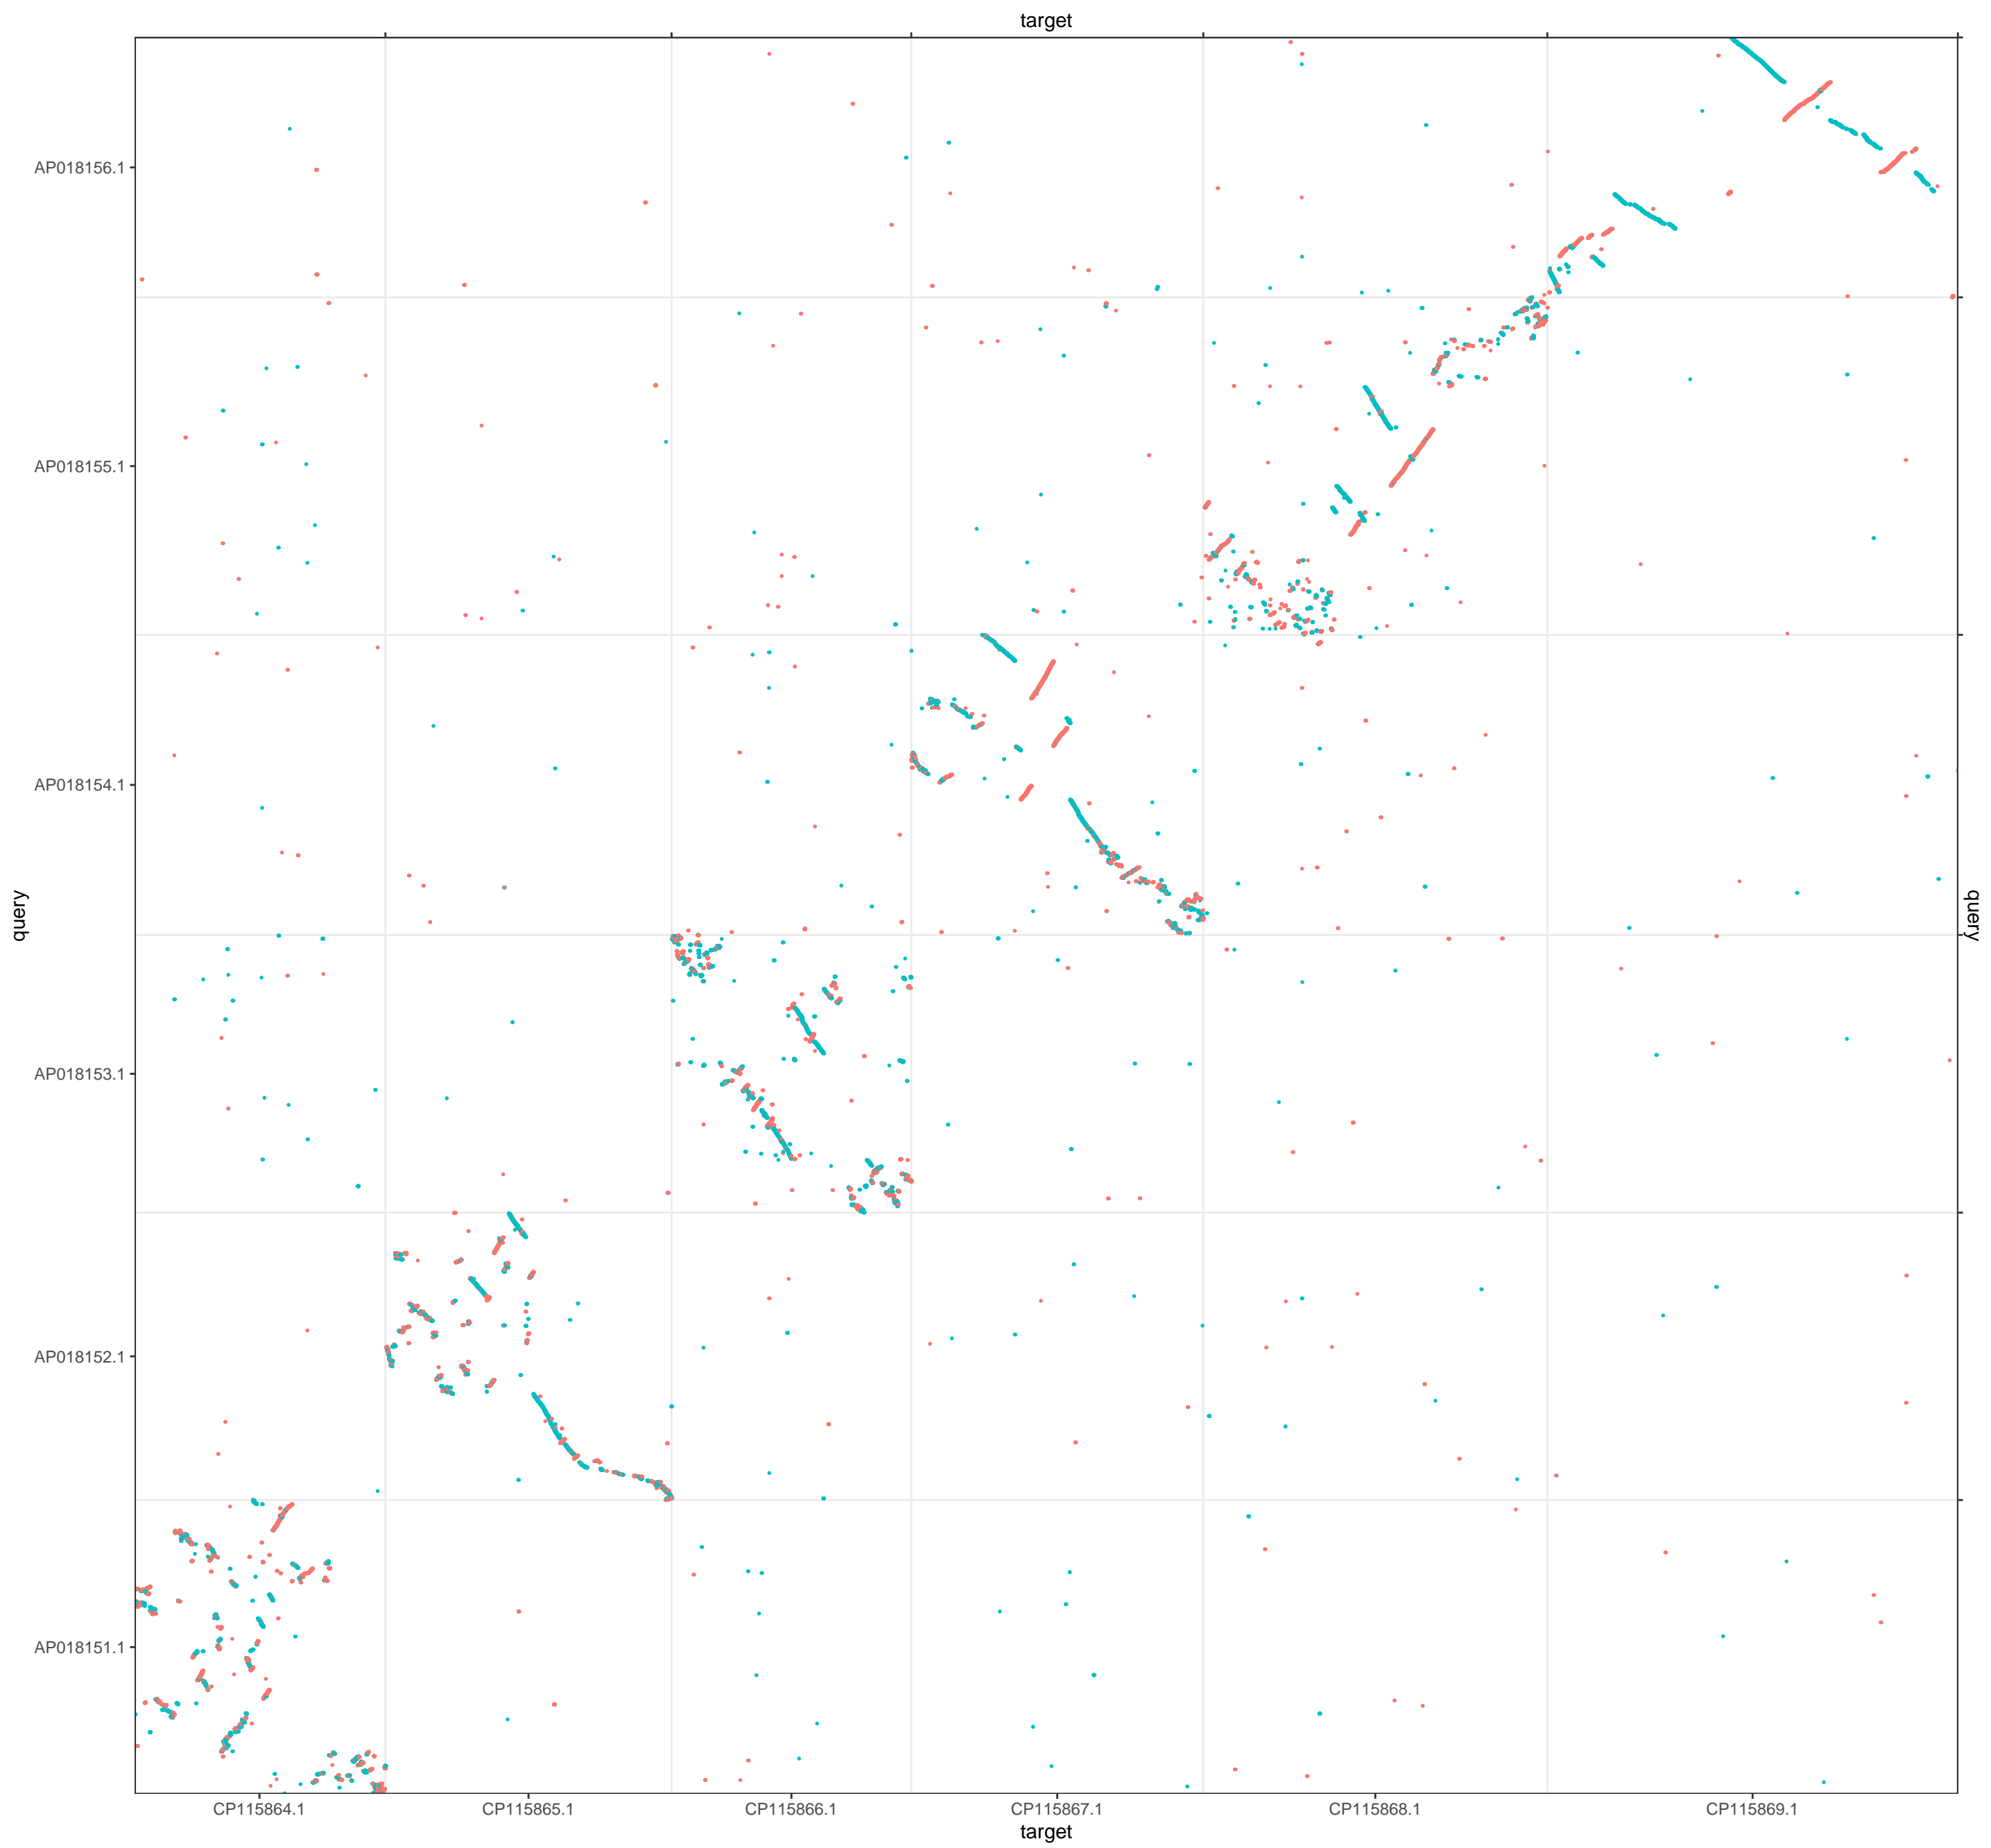

Supplement: Supplemental_Data.zip [file Cni_Cin-1.pdf › Supplemental_Data/articles/OxfordPlots_files/figure-html/Cni_Cin-1.pdf]

C. nigoni vs C. remanei

target

CM050499.1

CM050498.1

CM050497.1

CM050496.1

CM050495.1

CM050494.1

CP115864.1

CP115865.1

CP115866.1

CP115867.1

CP115868.1

CP115869.1

target

query

query

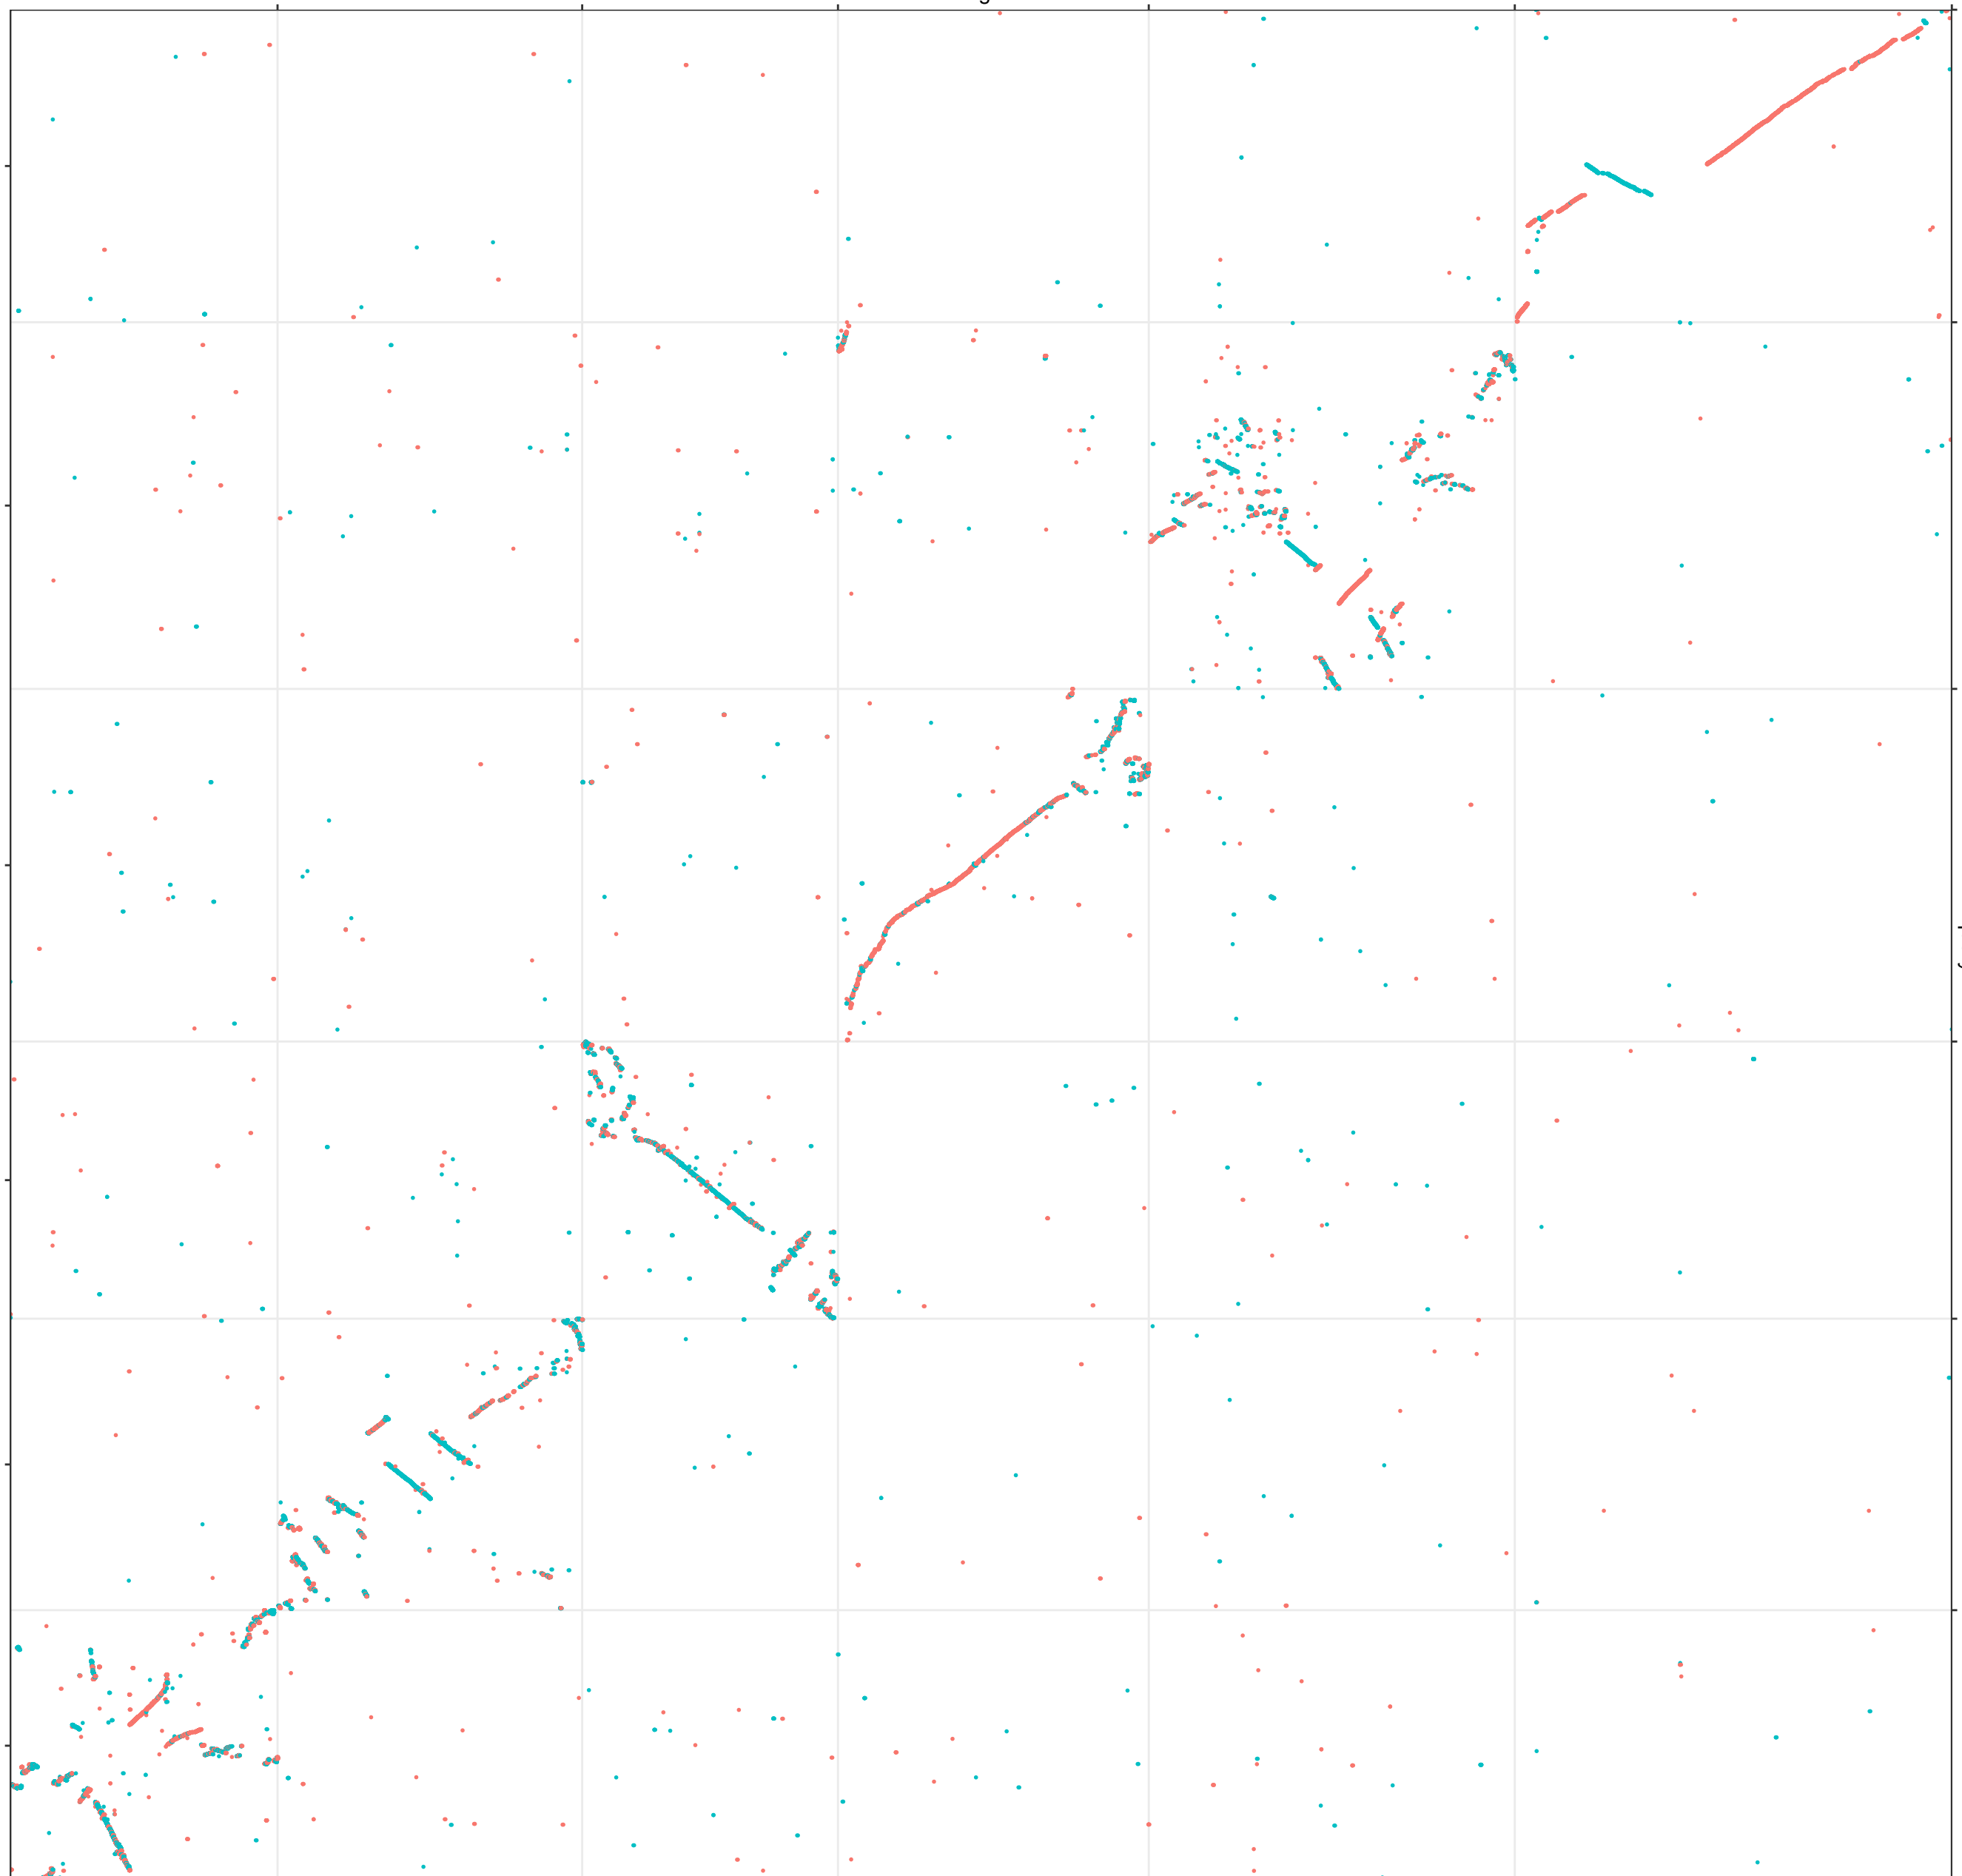

Supplement: Supplemental_Data.zip [file Cni_Cre-1.pdf › Supplemental_Data/articles/OxfordPlots_files/figure-html/Cni_Cre-1.pdf]

# Dmel vs Dbus

target

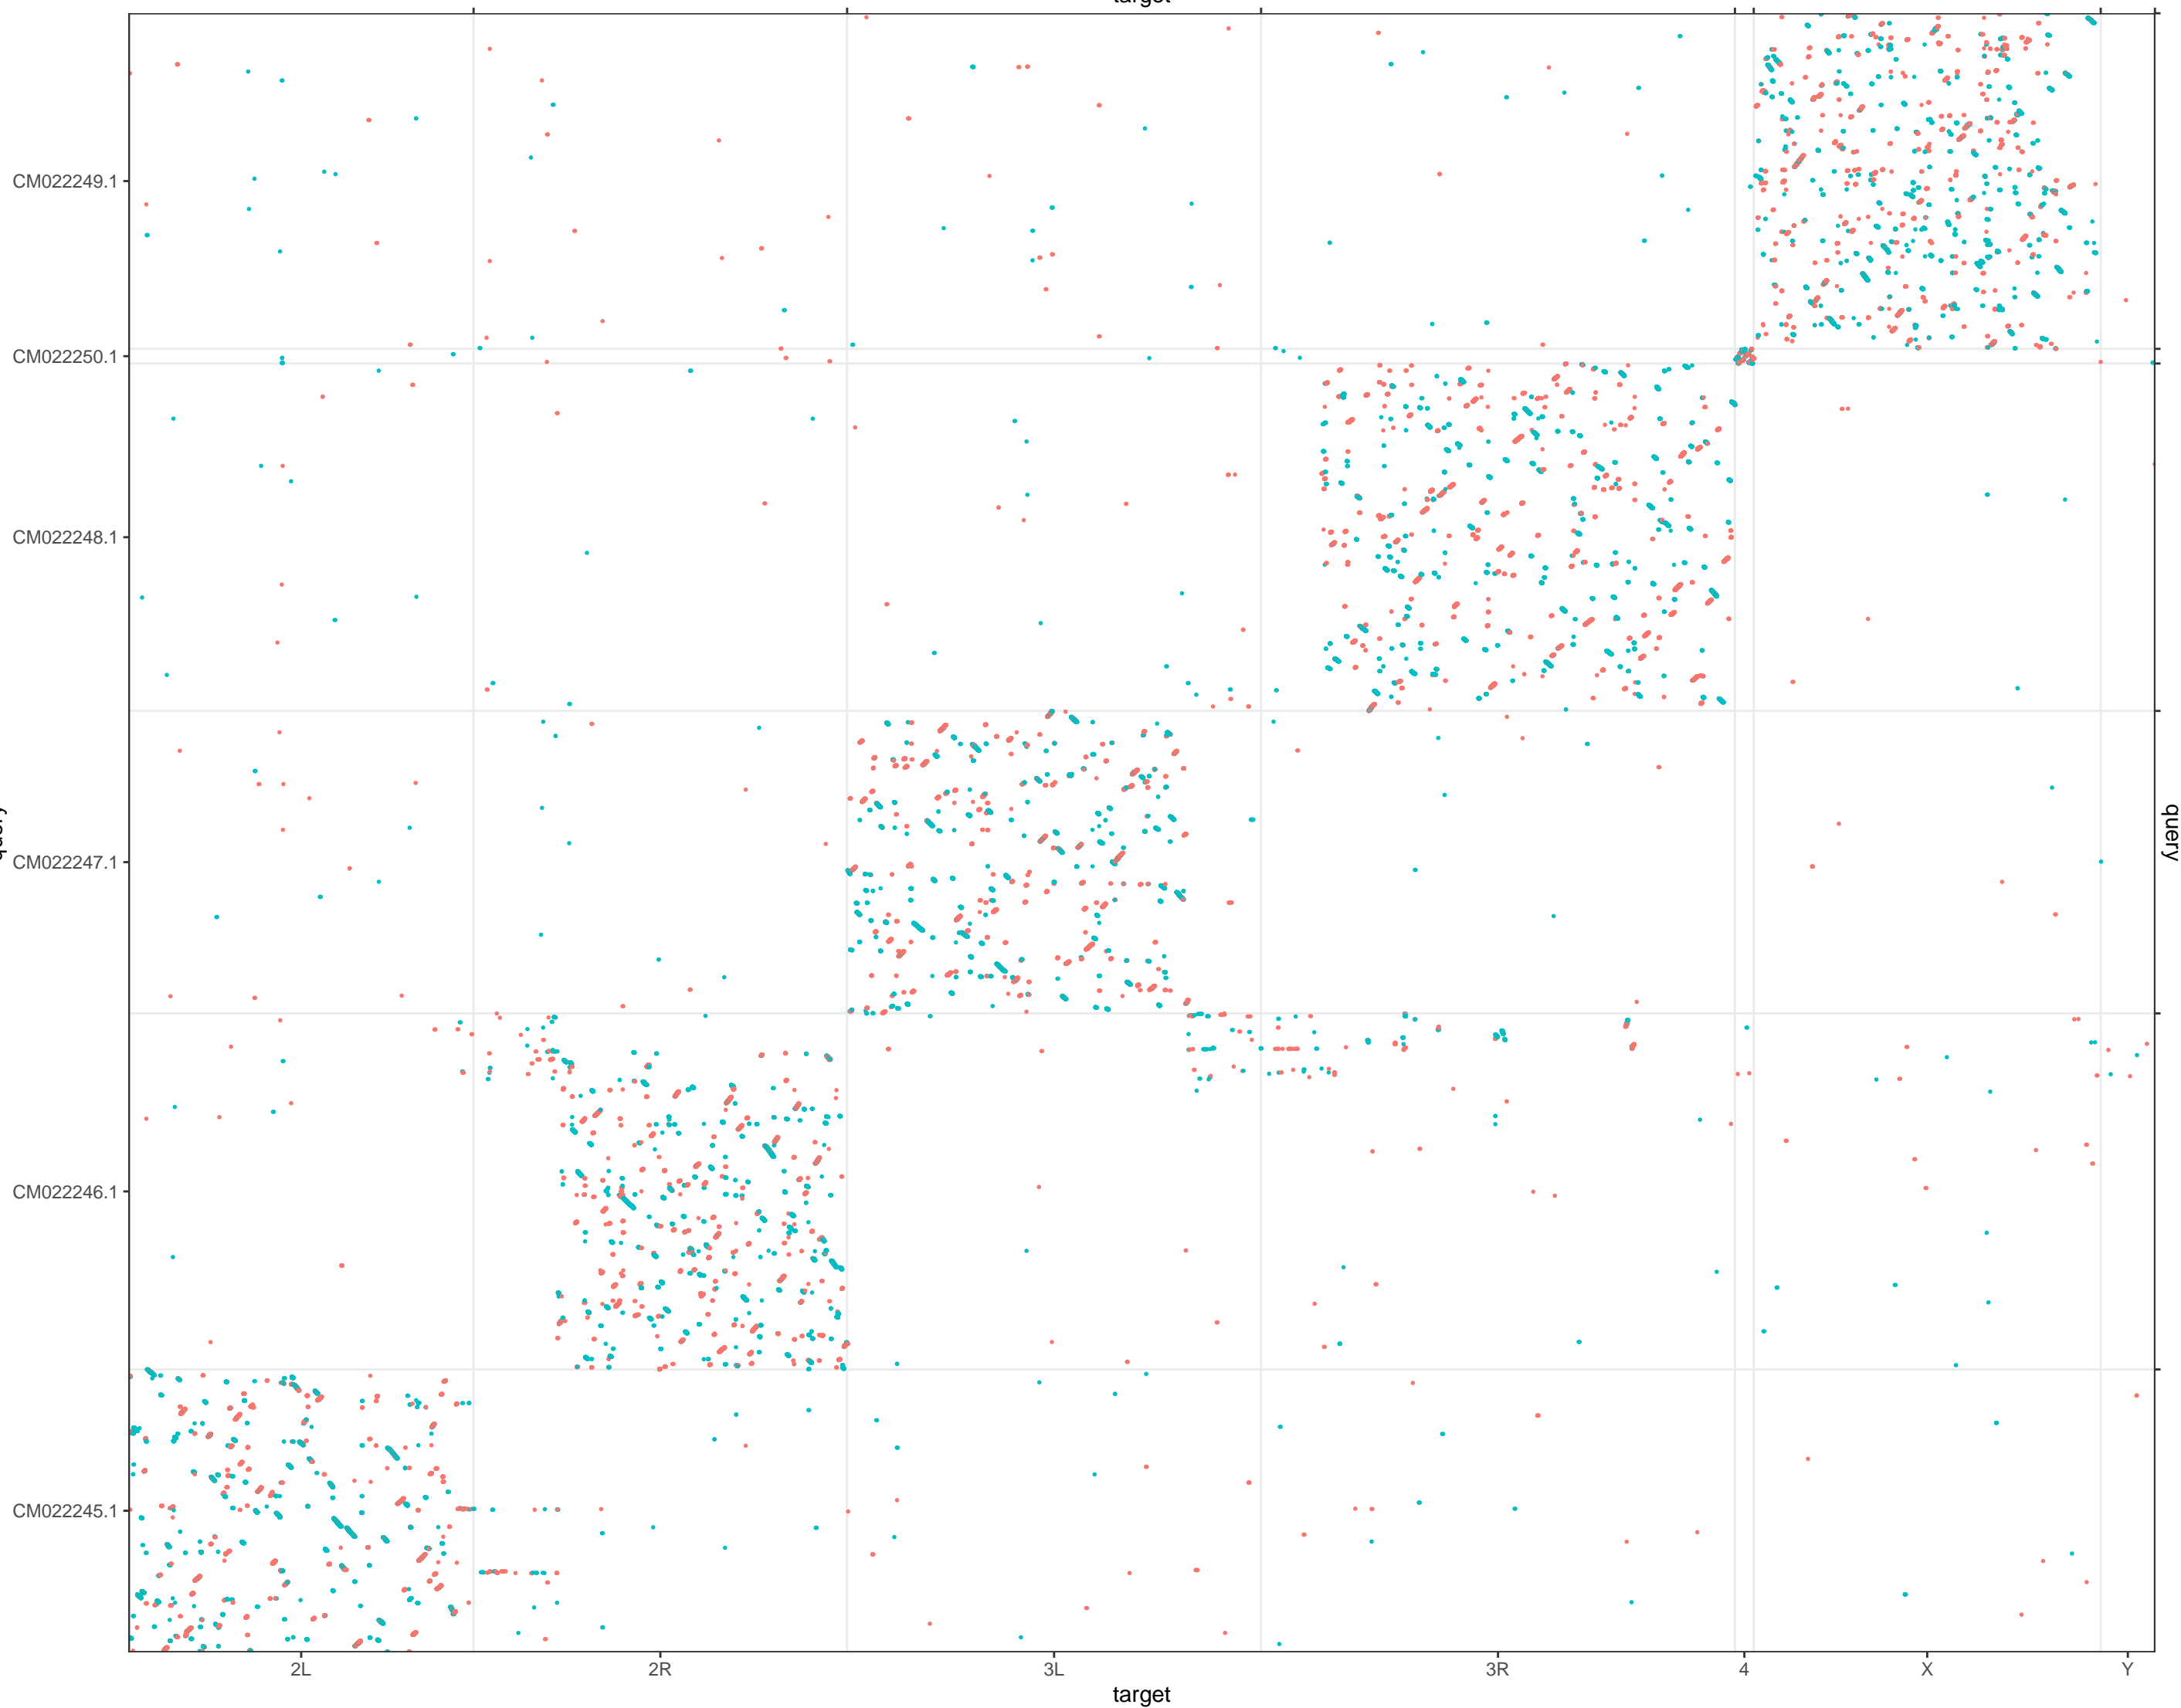

Supplement: Supplemental_Data.zip [file Dmel_Dbus-1.pdf › Supplemental_Data/articles/OxfordPlots_files/figure-html/Dmel_Dbus-1.pdf]

Dmel vs Dmau

target

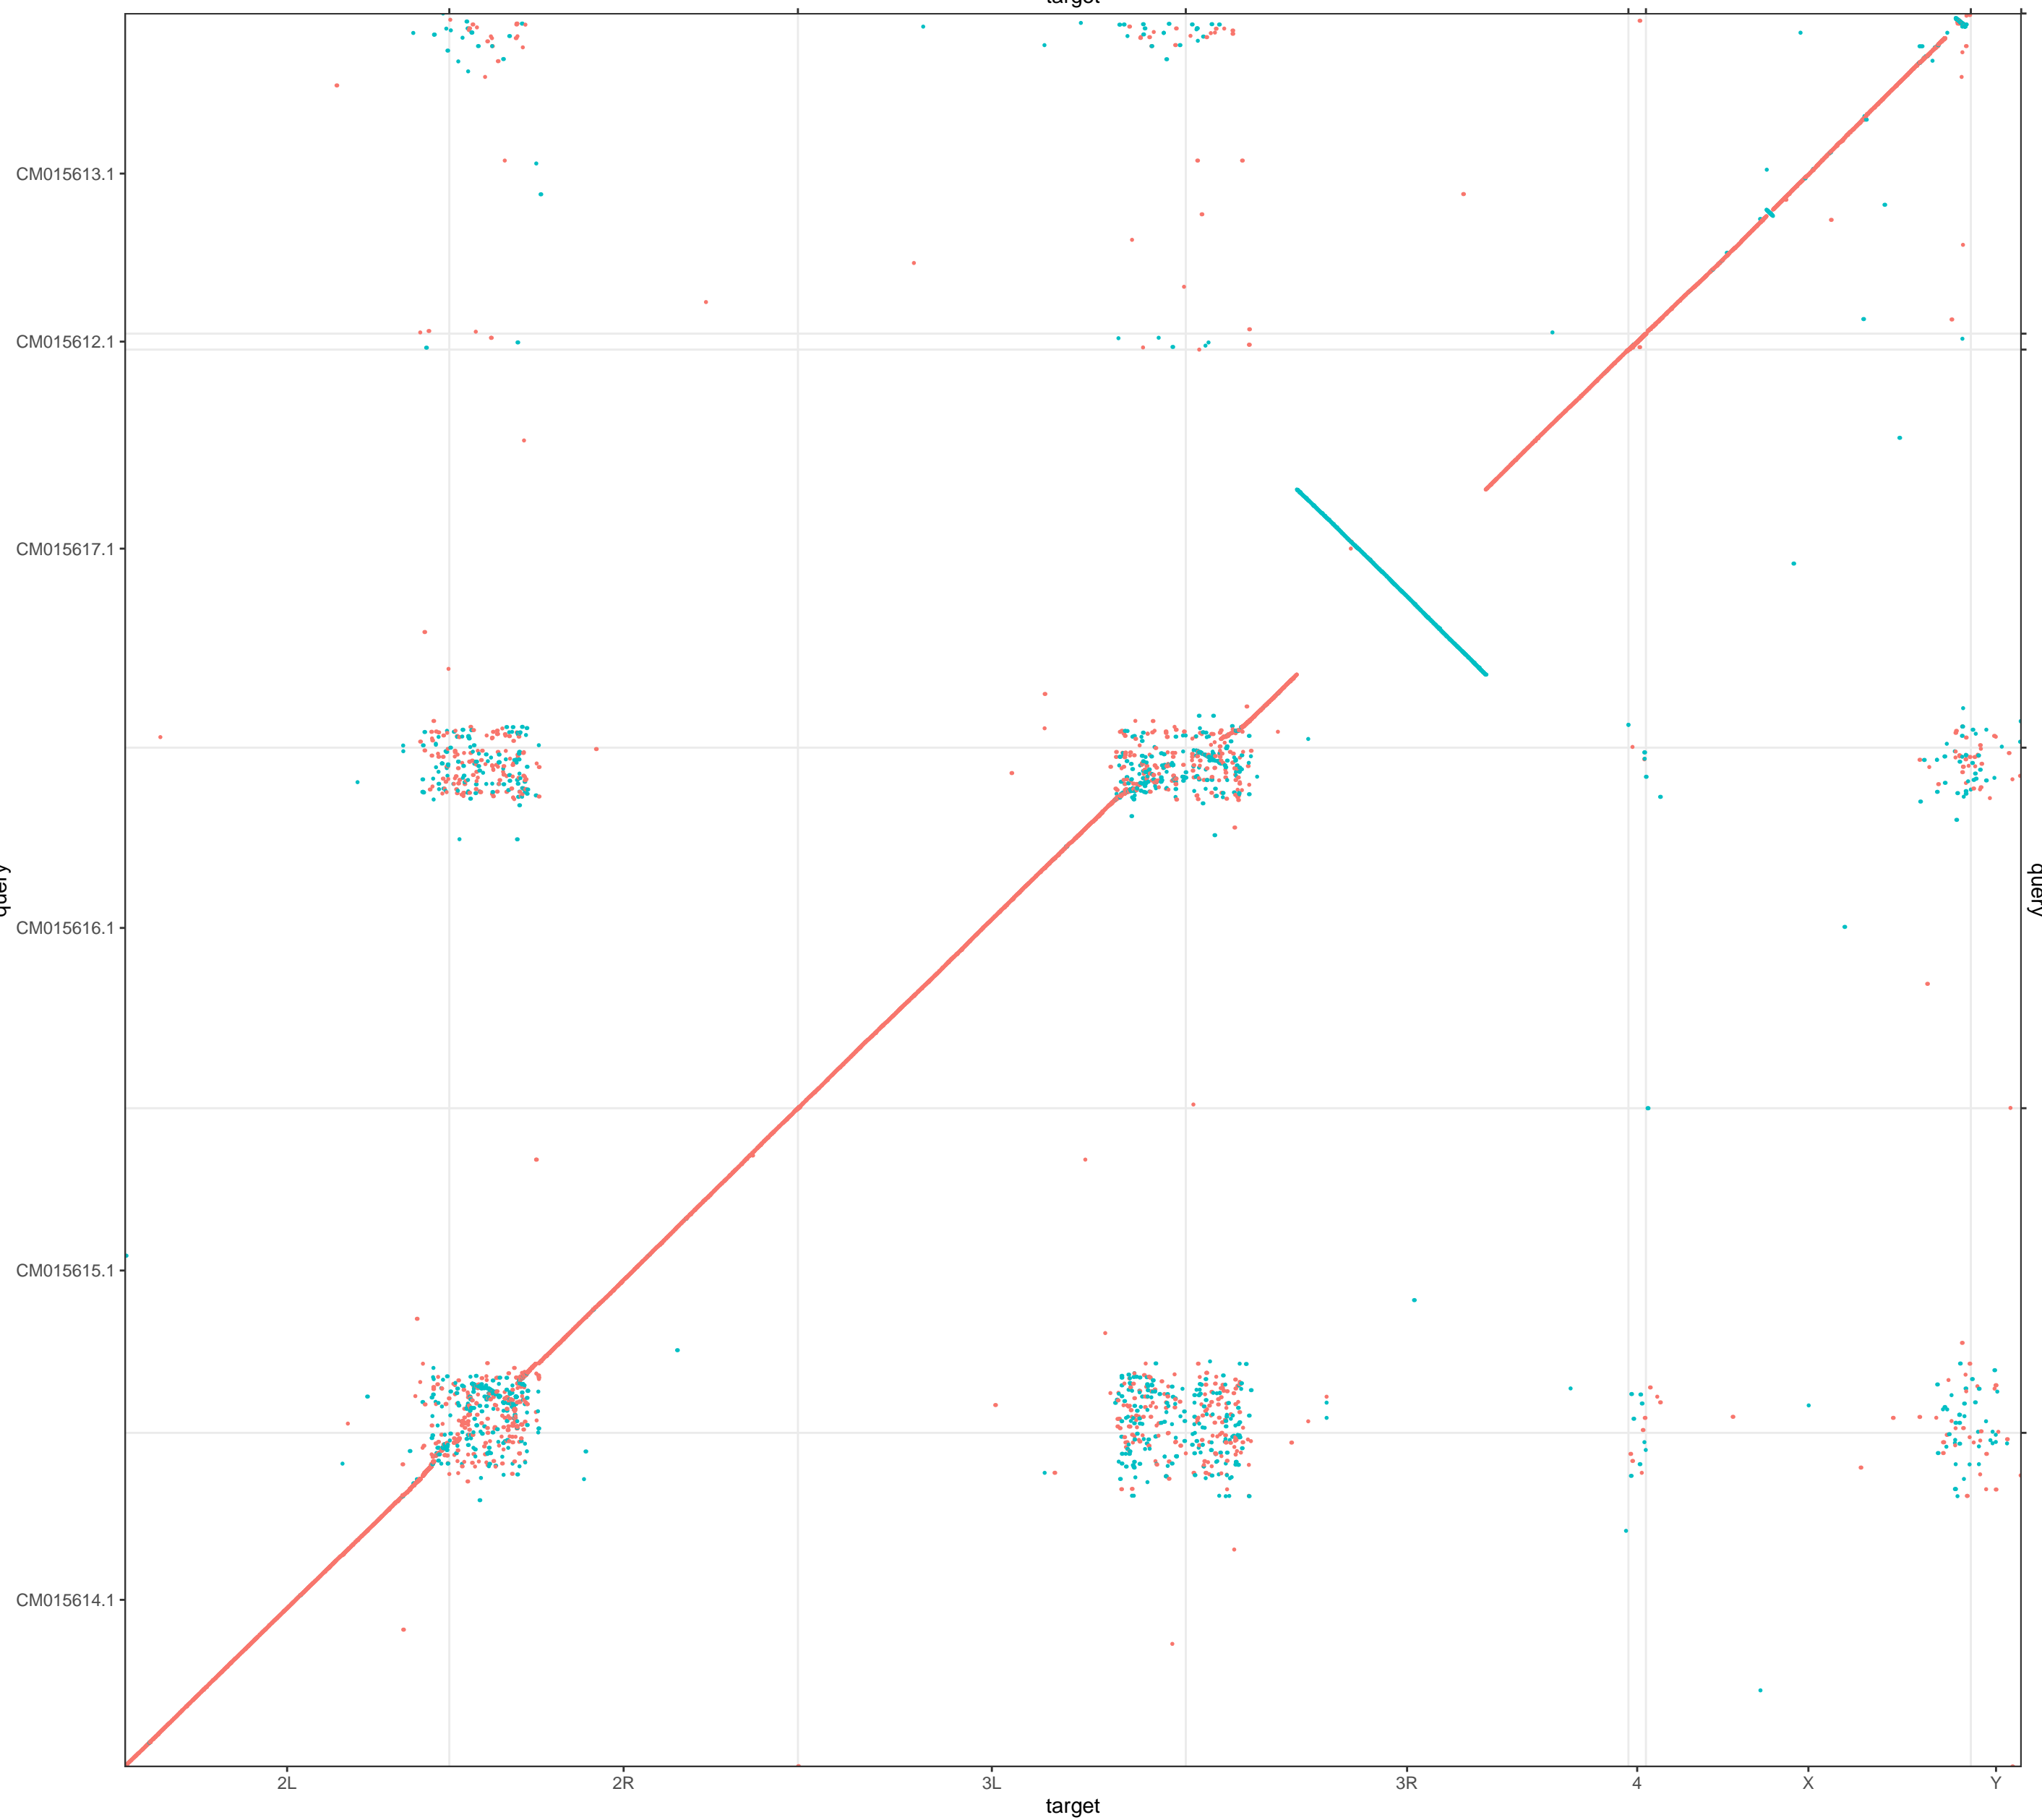

Supplement: Supplemental_Data.zip [file Dmel_Dmau-1.pdf › Supplemental_Data/articles/OxfordPlots_files/figure-html/Dmel_Dmau-1.pdf]

target

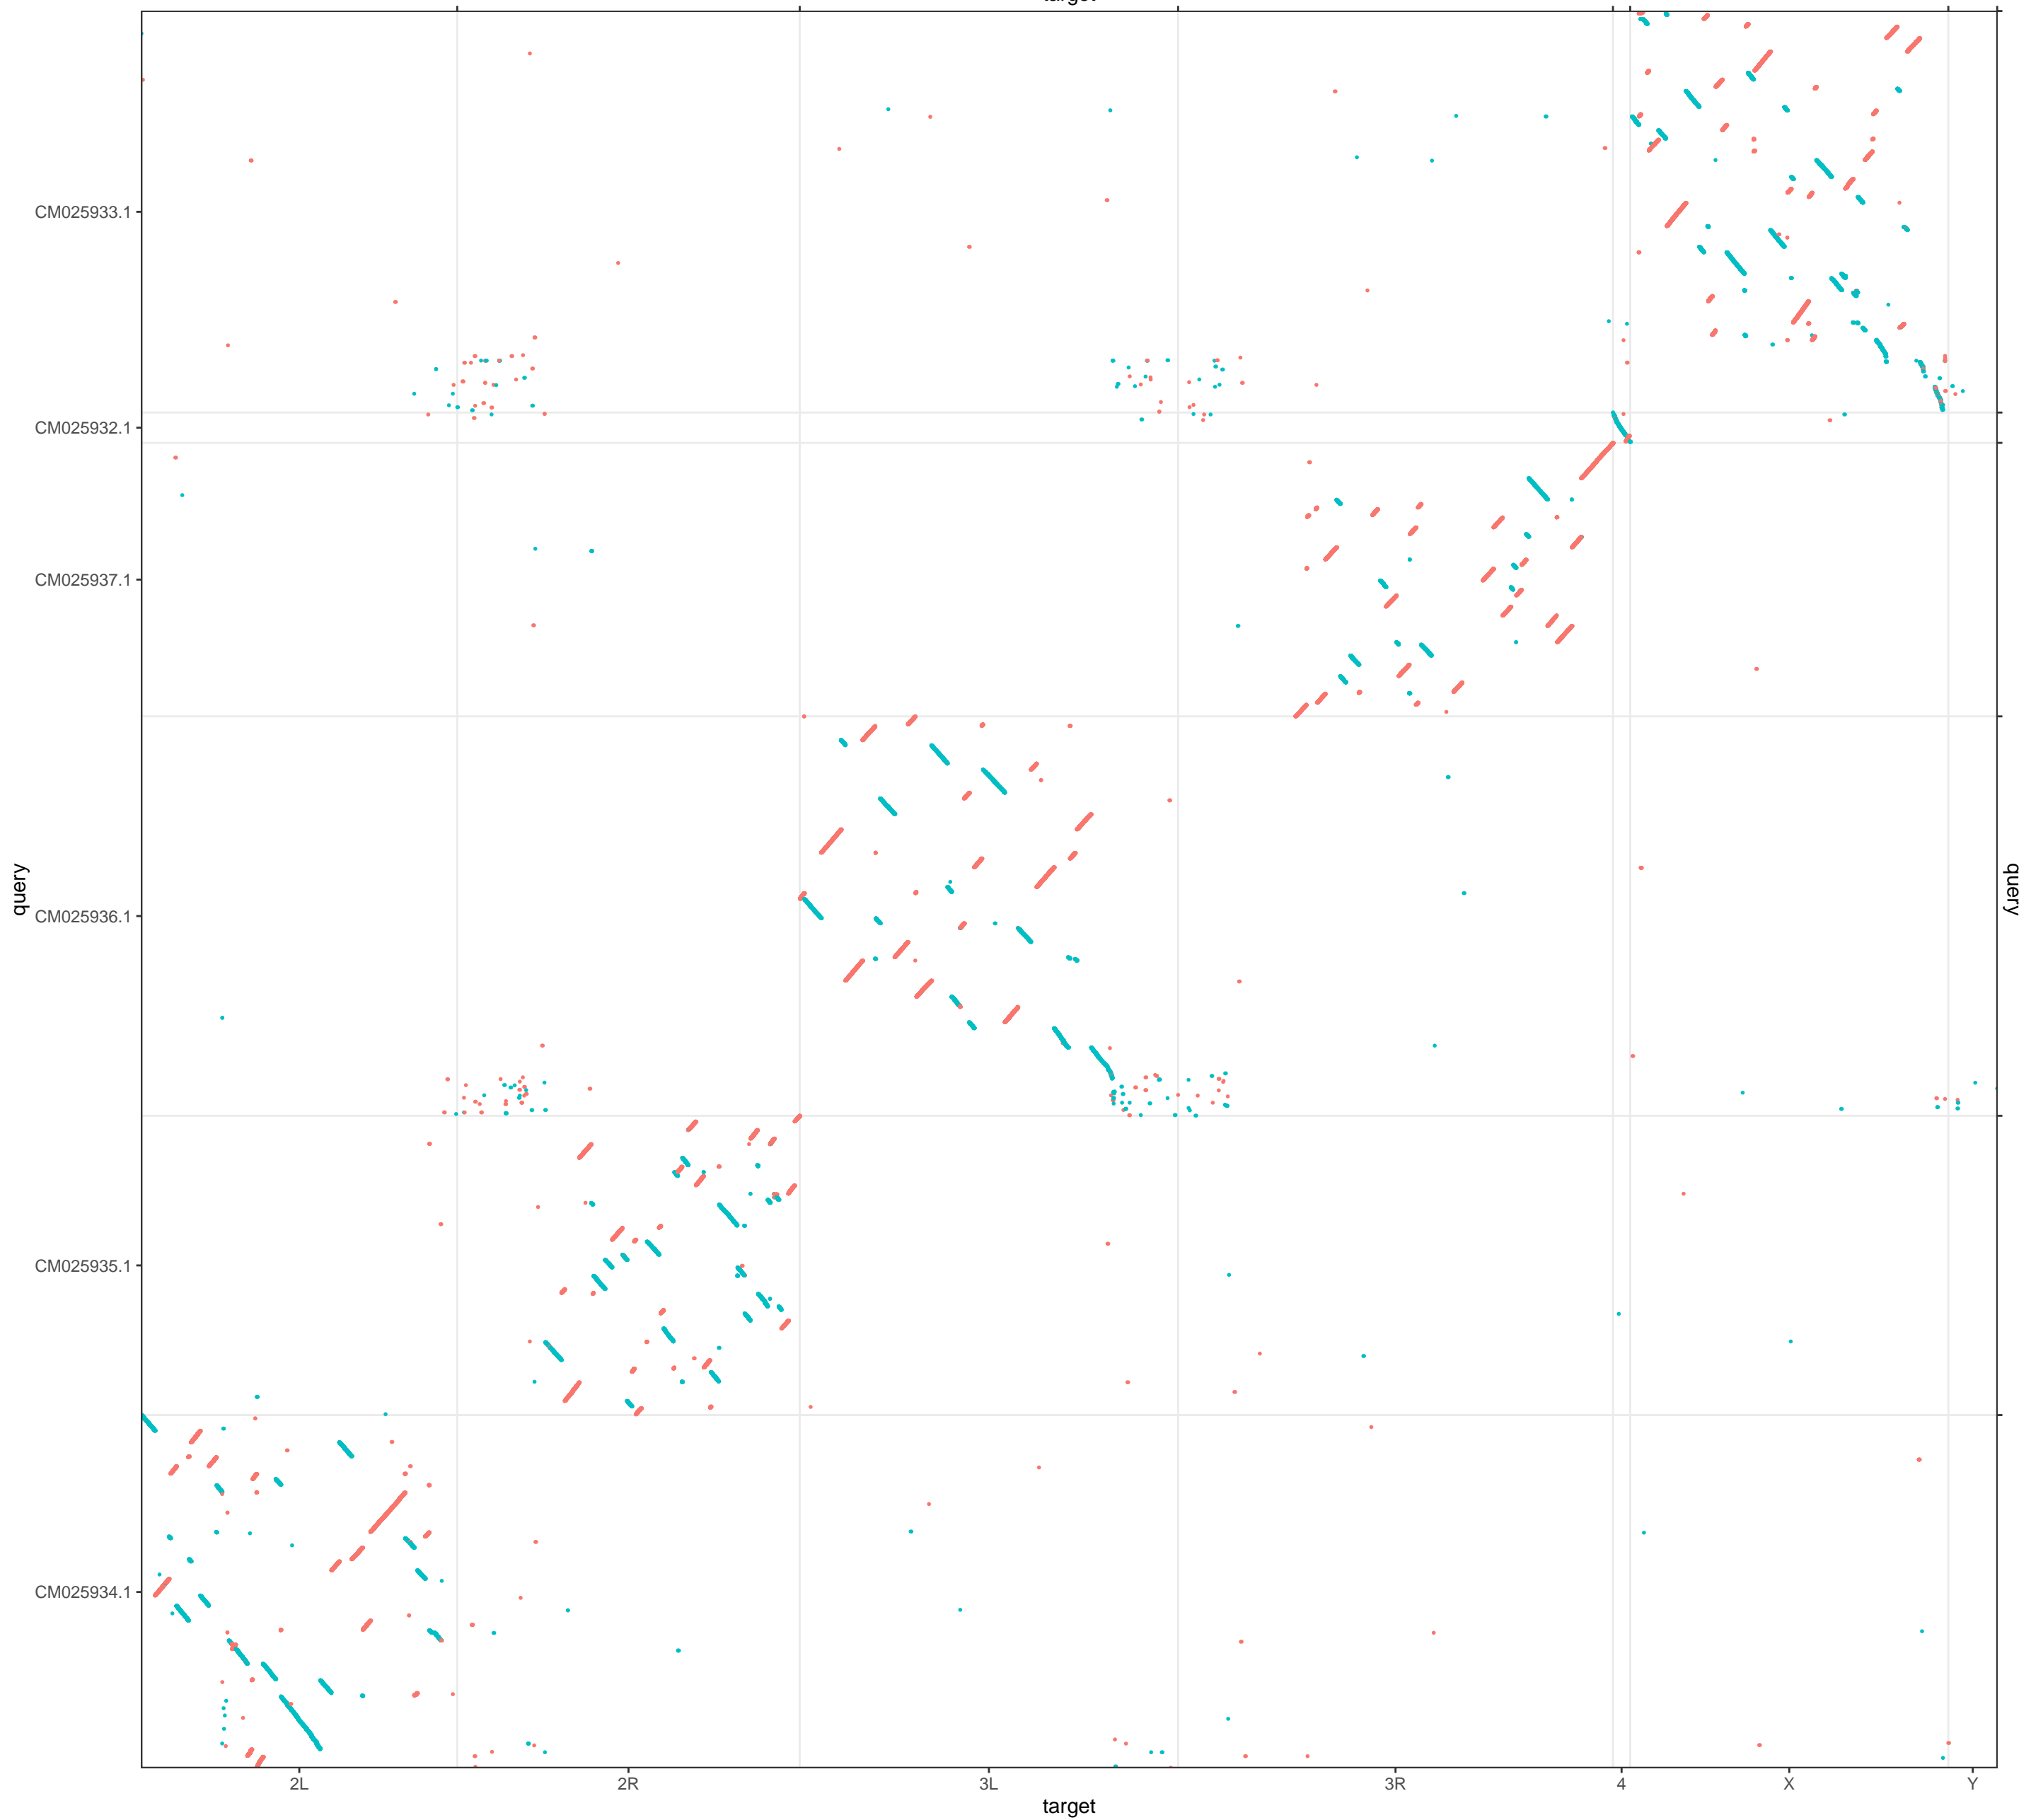

Supplement: Supplemental_Data.zip [file Dmel_Dsub-1.pdf › Supplemental_Data/articles/OxfordPlots_files/figure-html/Dmel_Dsub-1.pdf]

Dmel vs Dyak

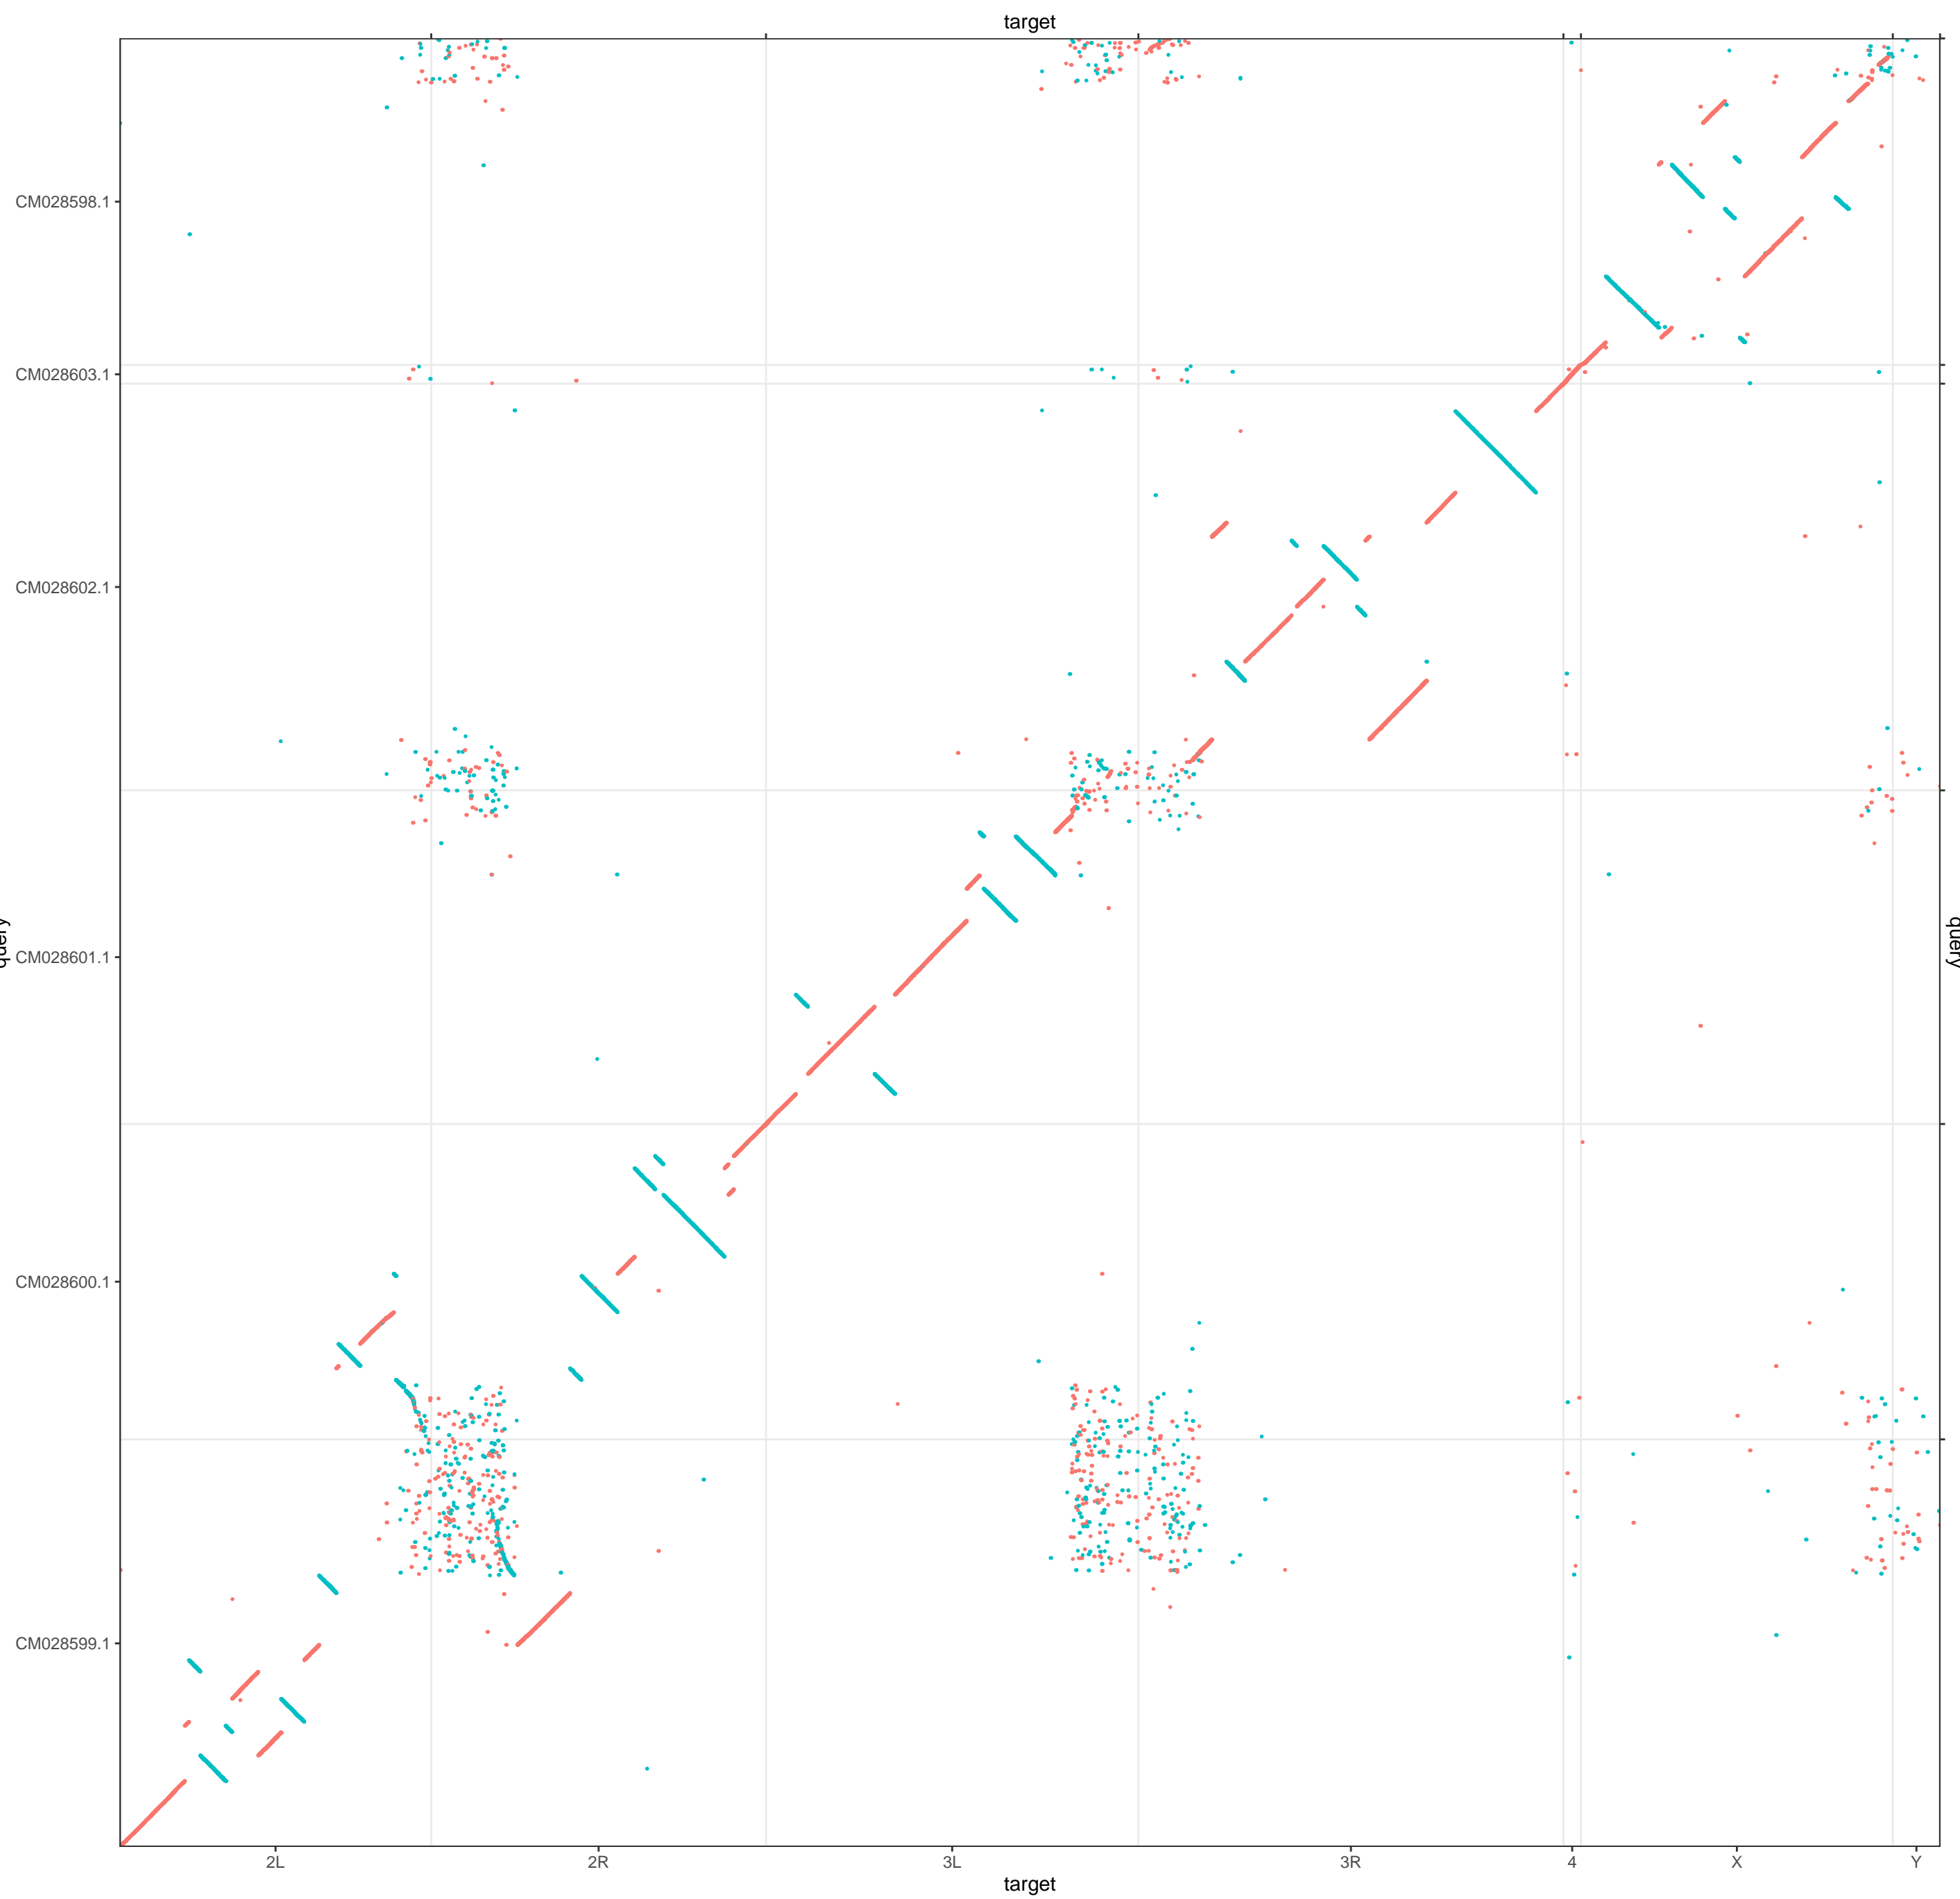

Supplement: Supplemental_Data.zip [file Dmel_Dyak-1.pdf › Supplemental_Data/articles/OxfordPlots_files/figure-html/Dmel_Dyak-1.pdf]

Muntiacus reevesi vs Muntiacus muntjak

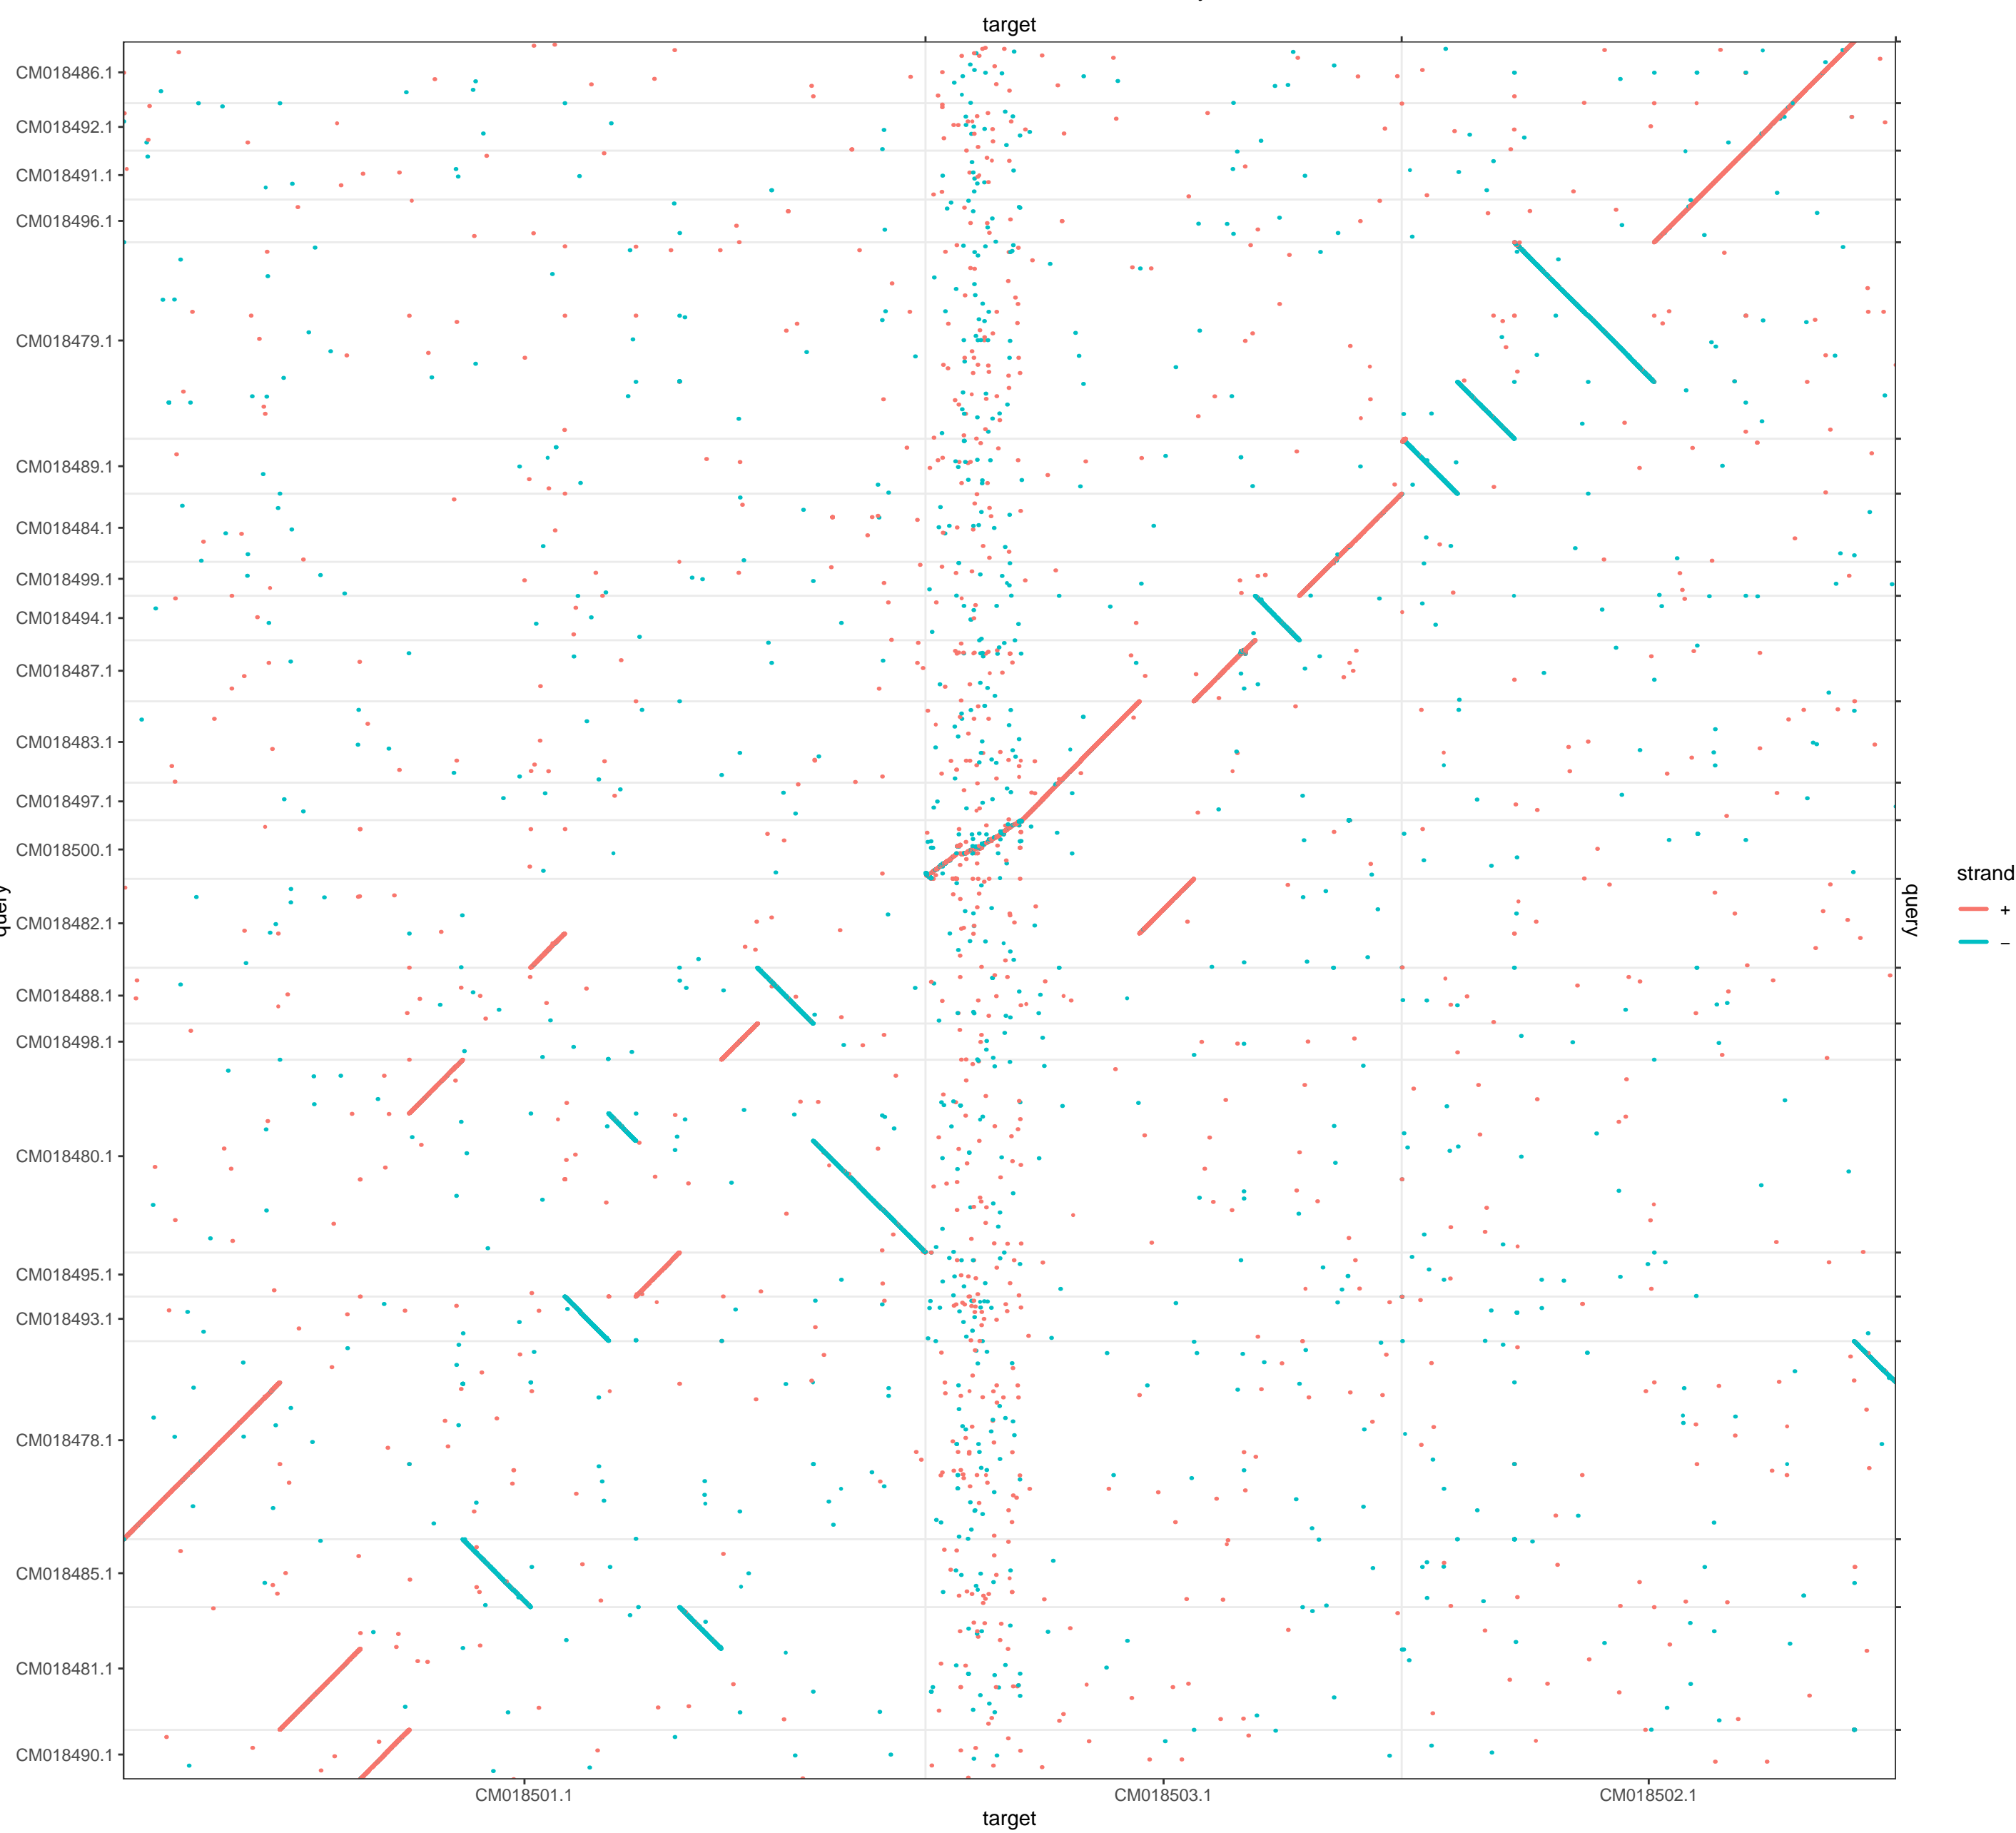

Supplement: Supplemental_Data.zip [file Mmun_Mree-1.pdf › Supplemental_Data/articles/OxfordPlots_files/figure-html/Mmun_Mree-1.pdf]

OKI2018.I69 vs Bar2.p4 macrosynteny plot

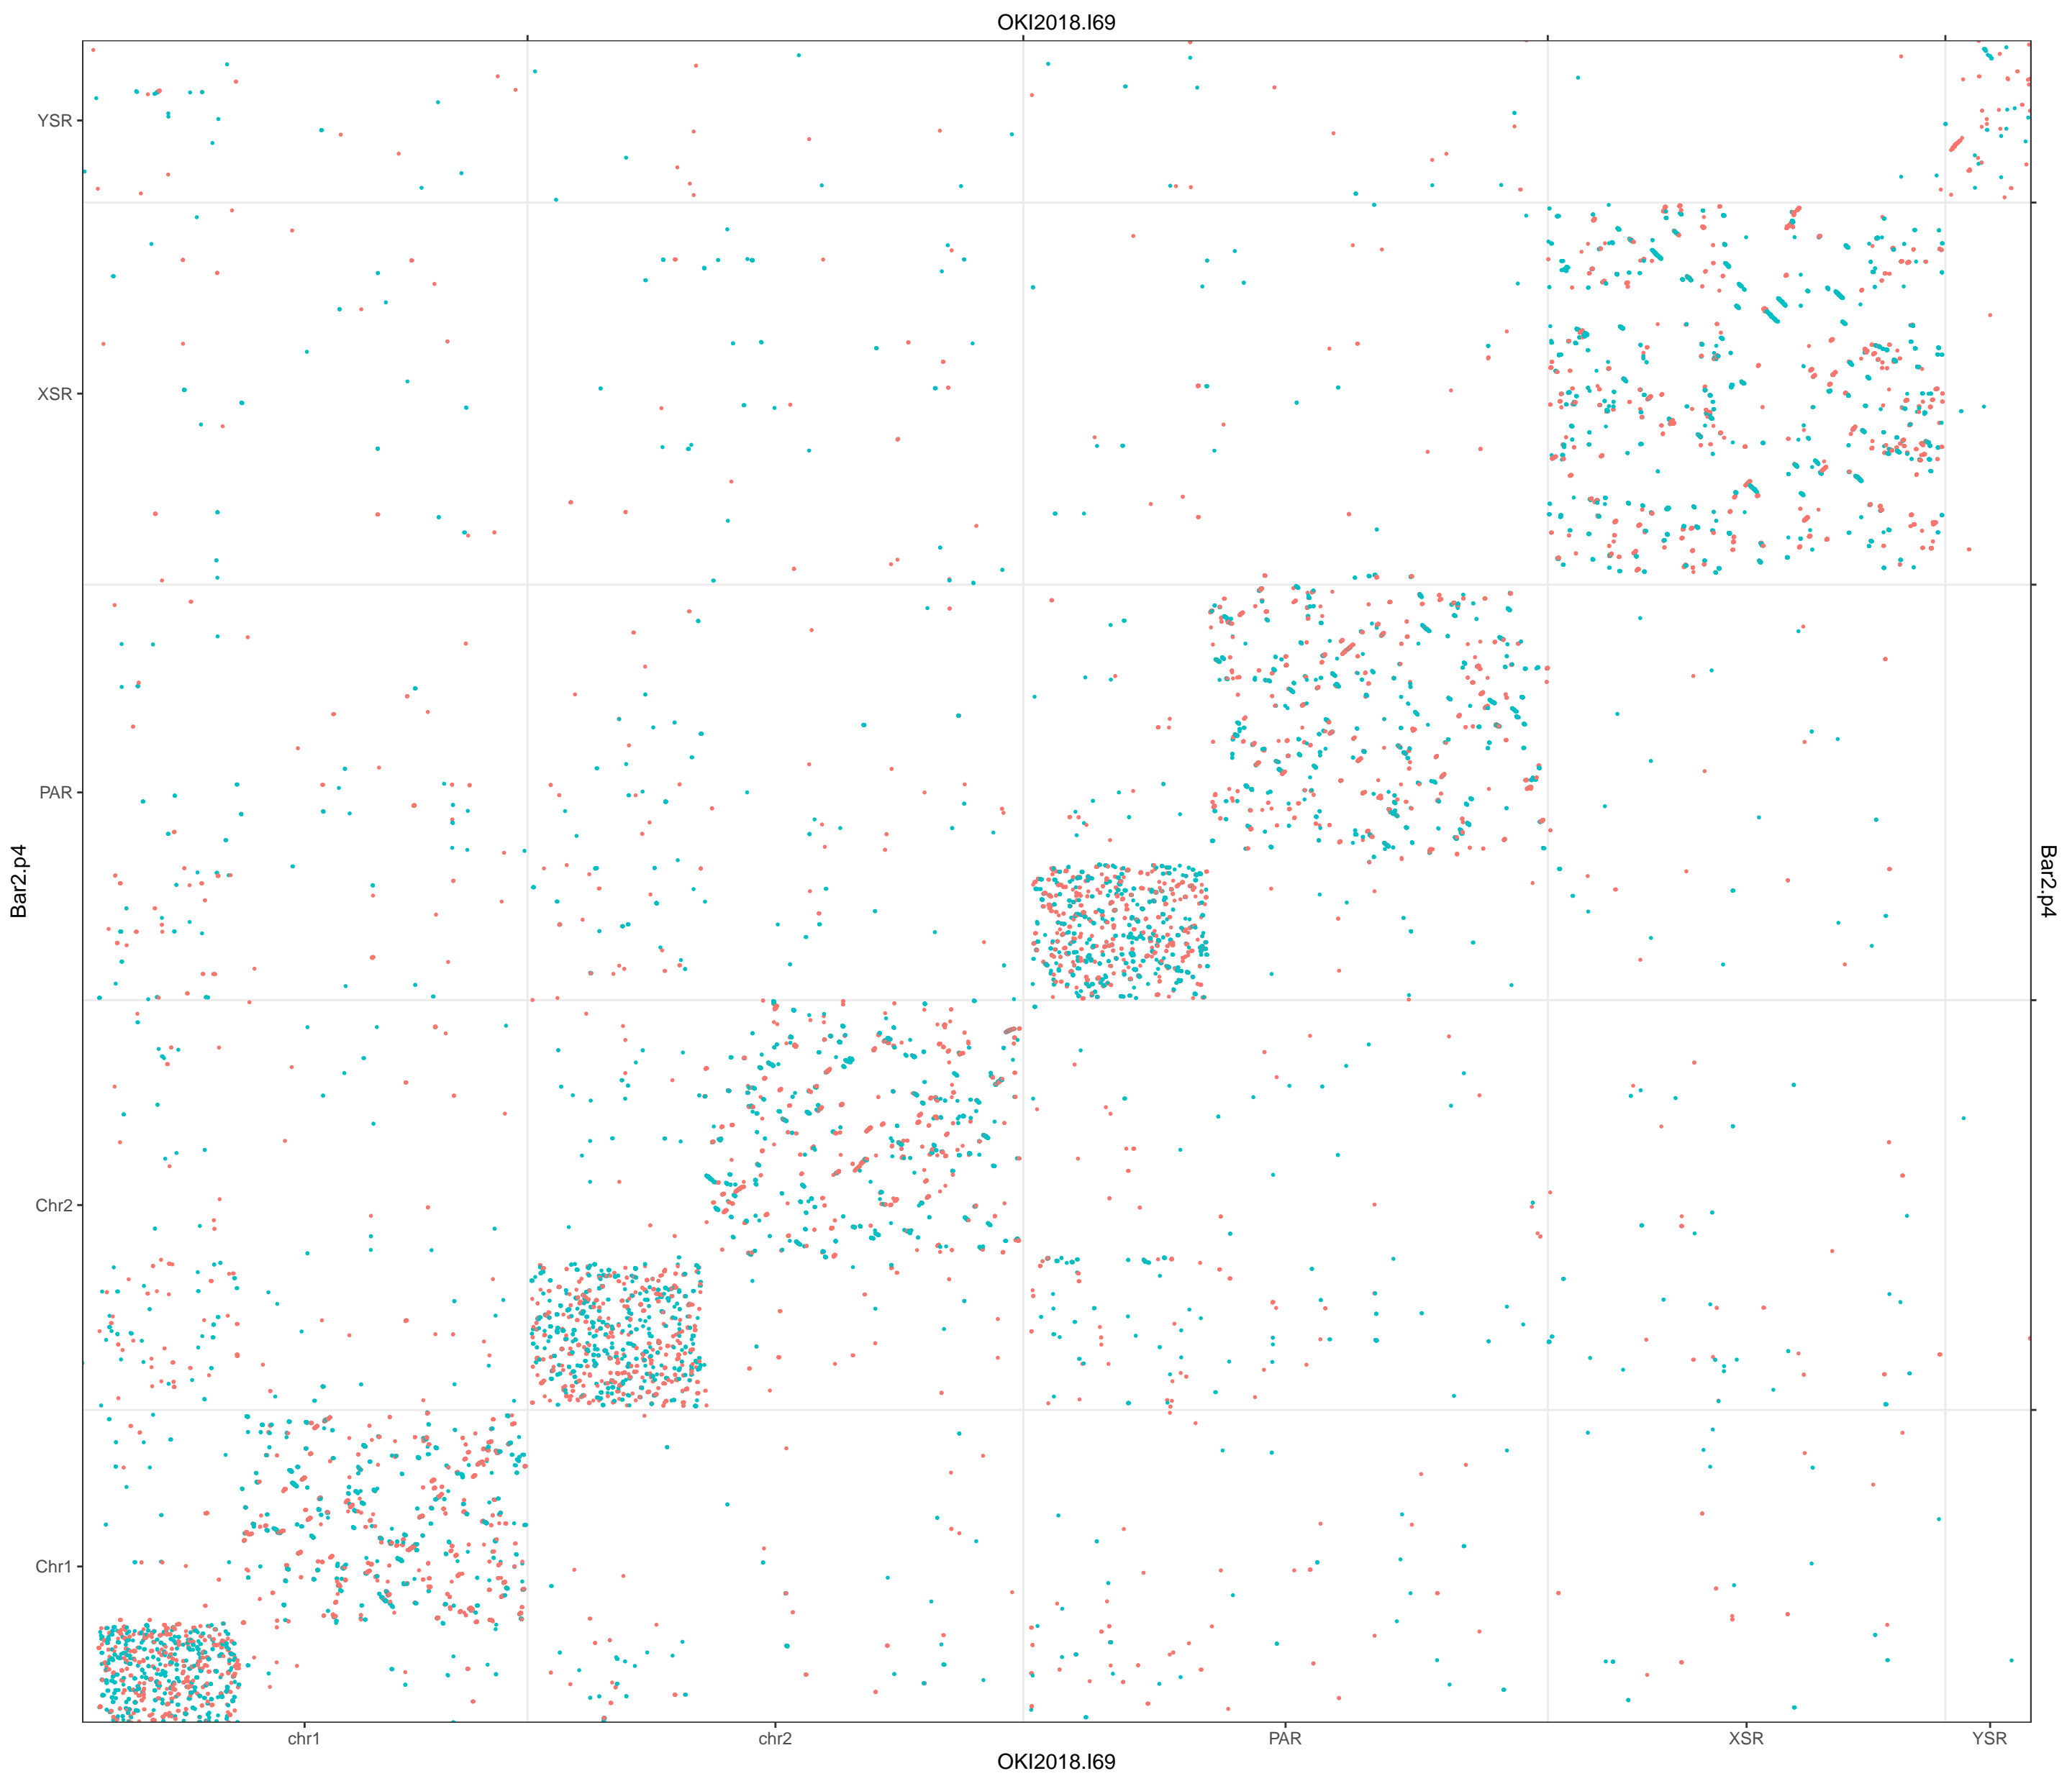

Supplement: Supplemental_Data.zip [file Oki_Bar_all-1.pdf › Supplemental_Data/articles/OxfordPlots_files/figure-html/Oki_Bar_all-1.pdf]

OKI2018.I69 vs KUM.M3.7f macrosynteny plot

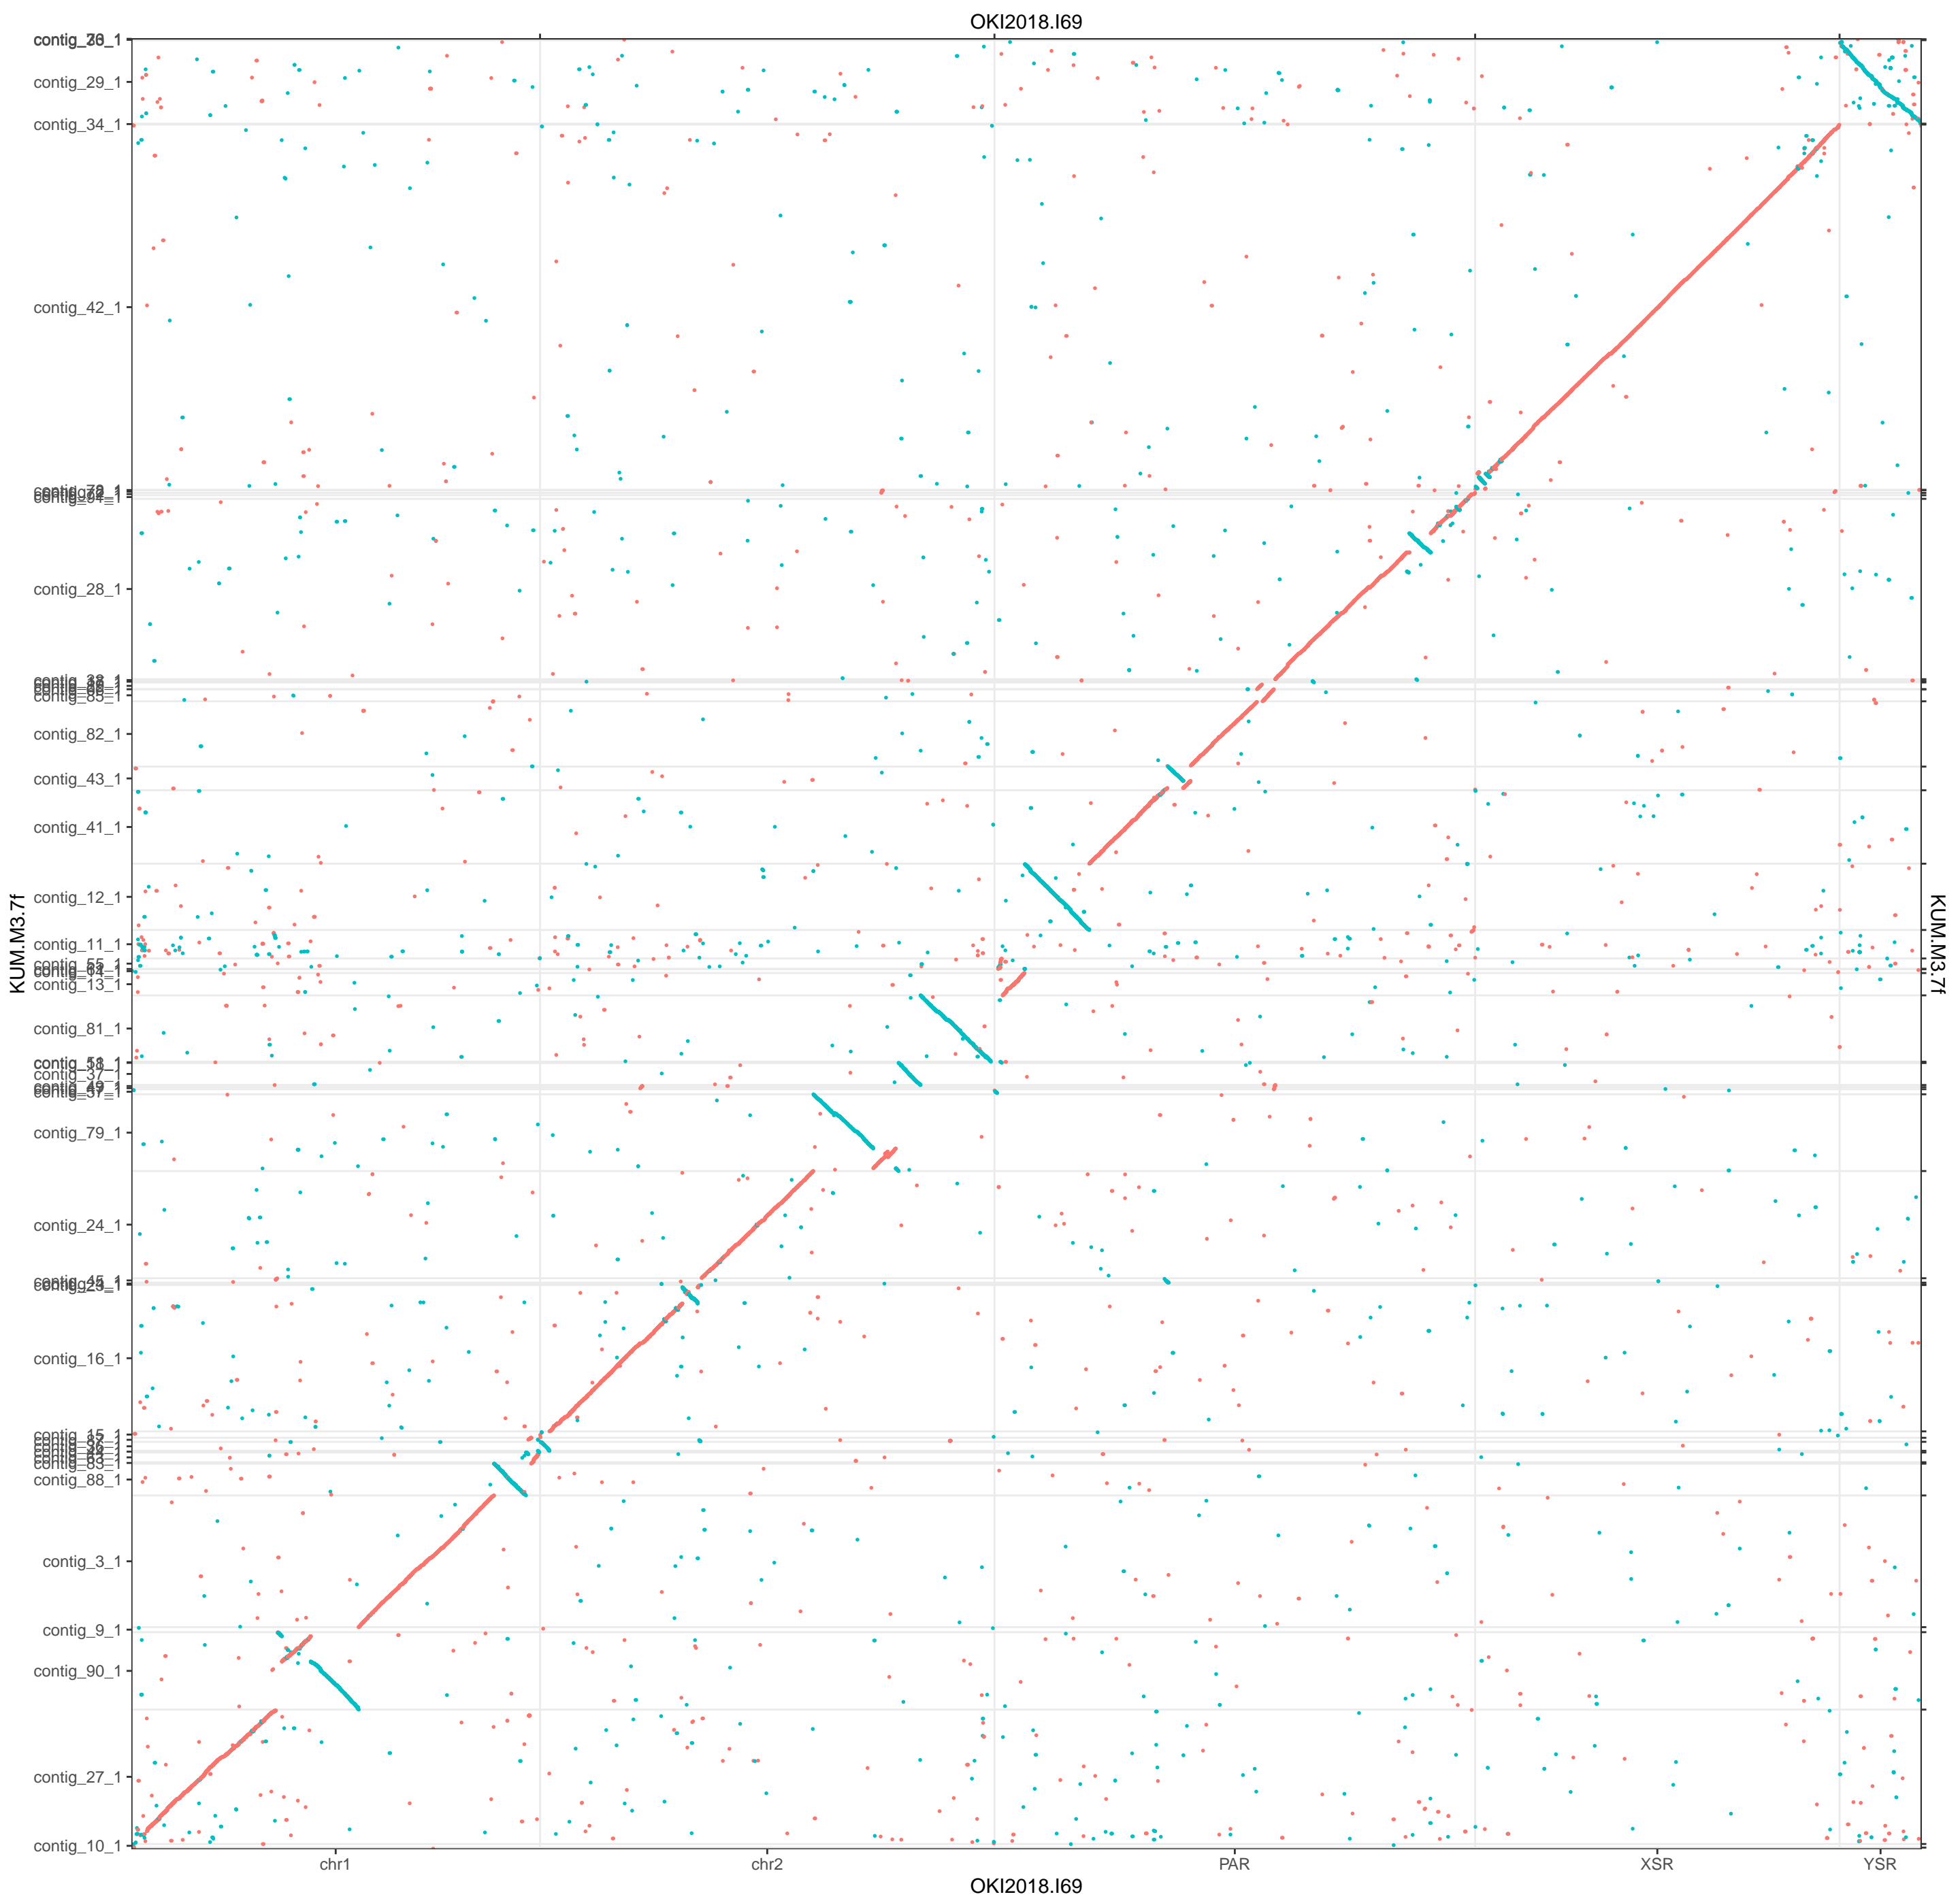

Supplement: Supplemental_Data.zip [file Oki_Kum-1.pdf › Supplemental_Data/articles/OxfordPlots_files/figure-html/Oki_Kum-1.pdf]

OKI2018.l69 vs OSKA2016v1.9 macrosynteny plot

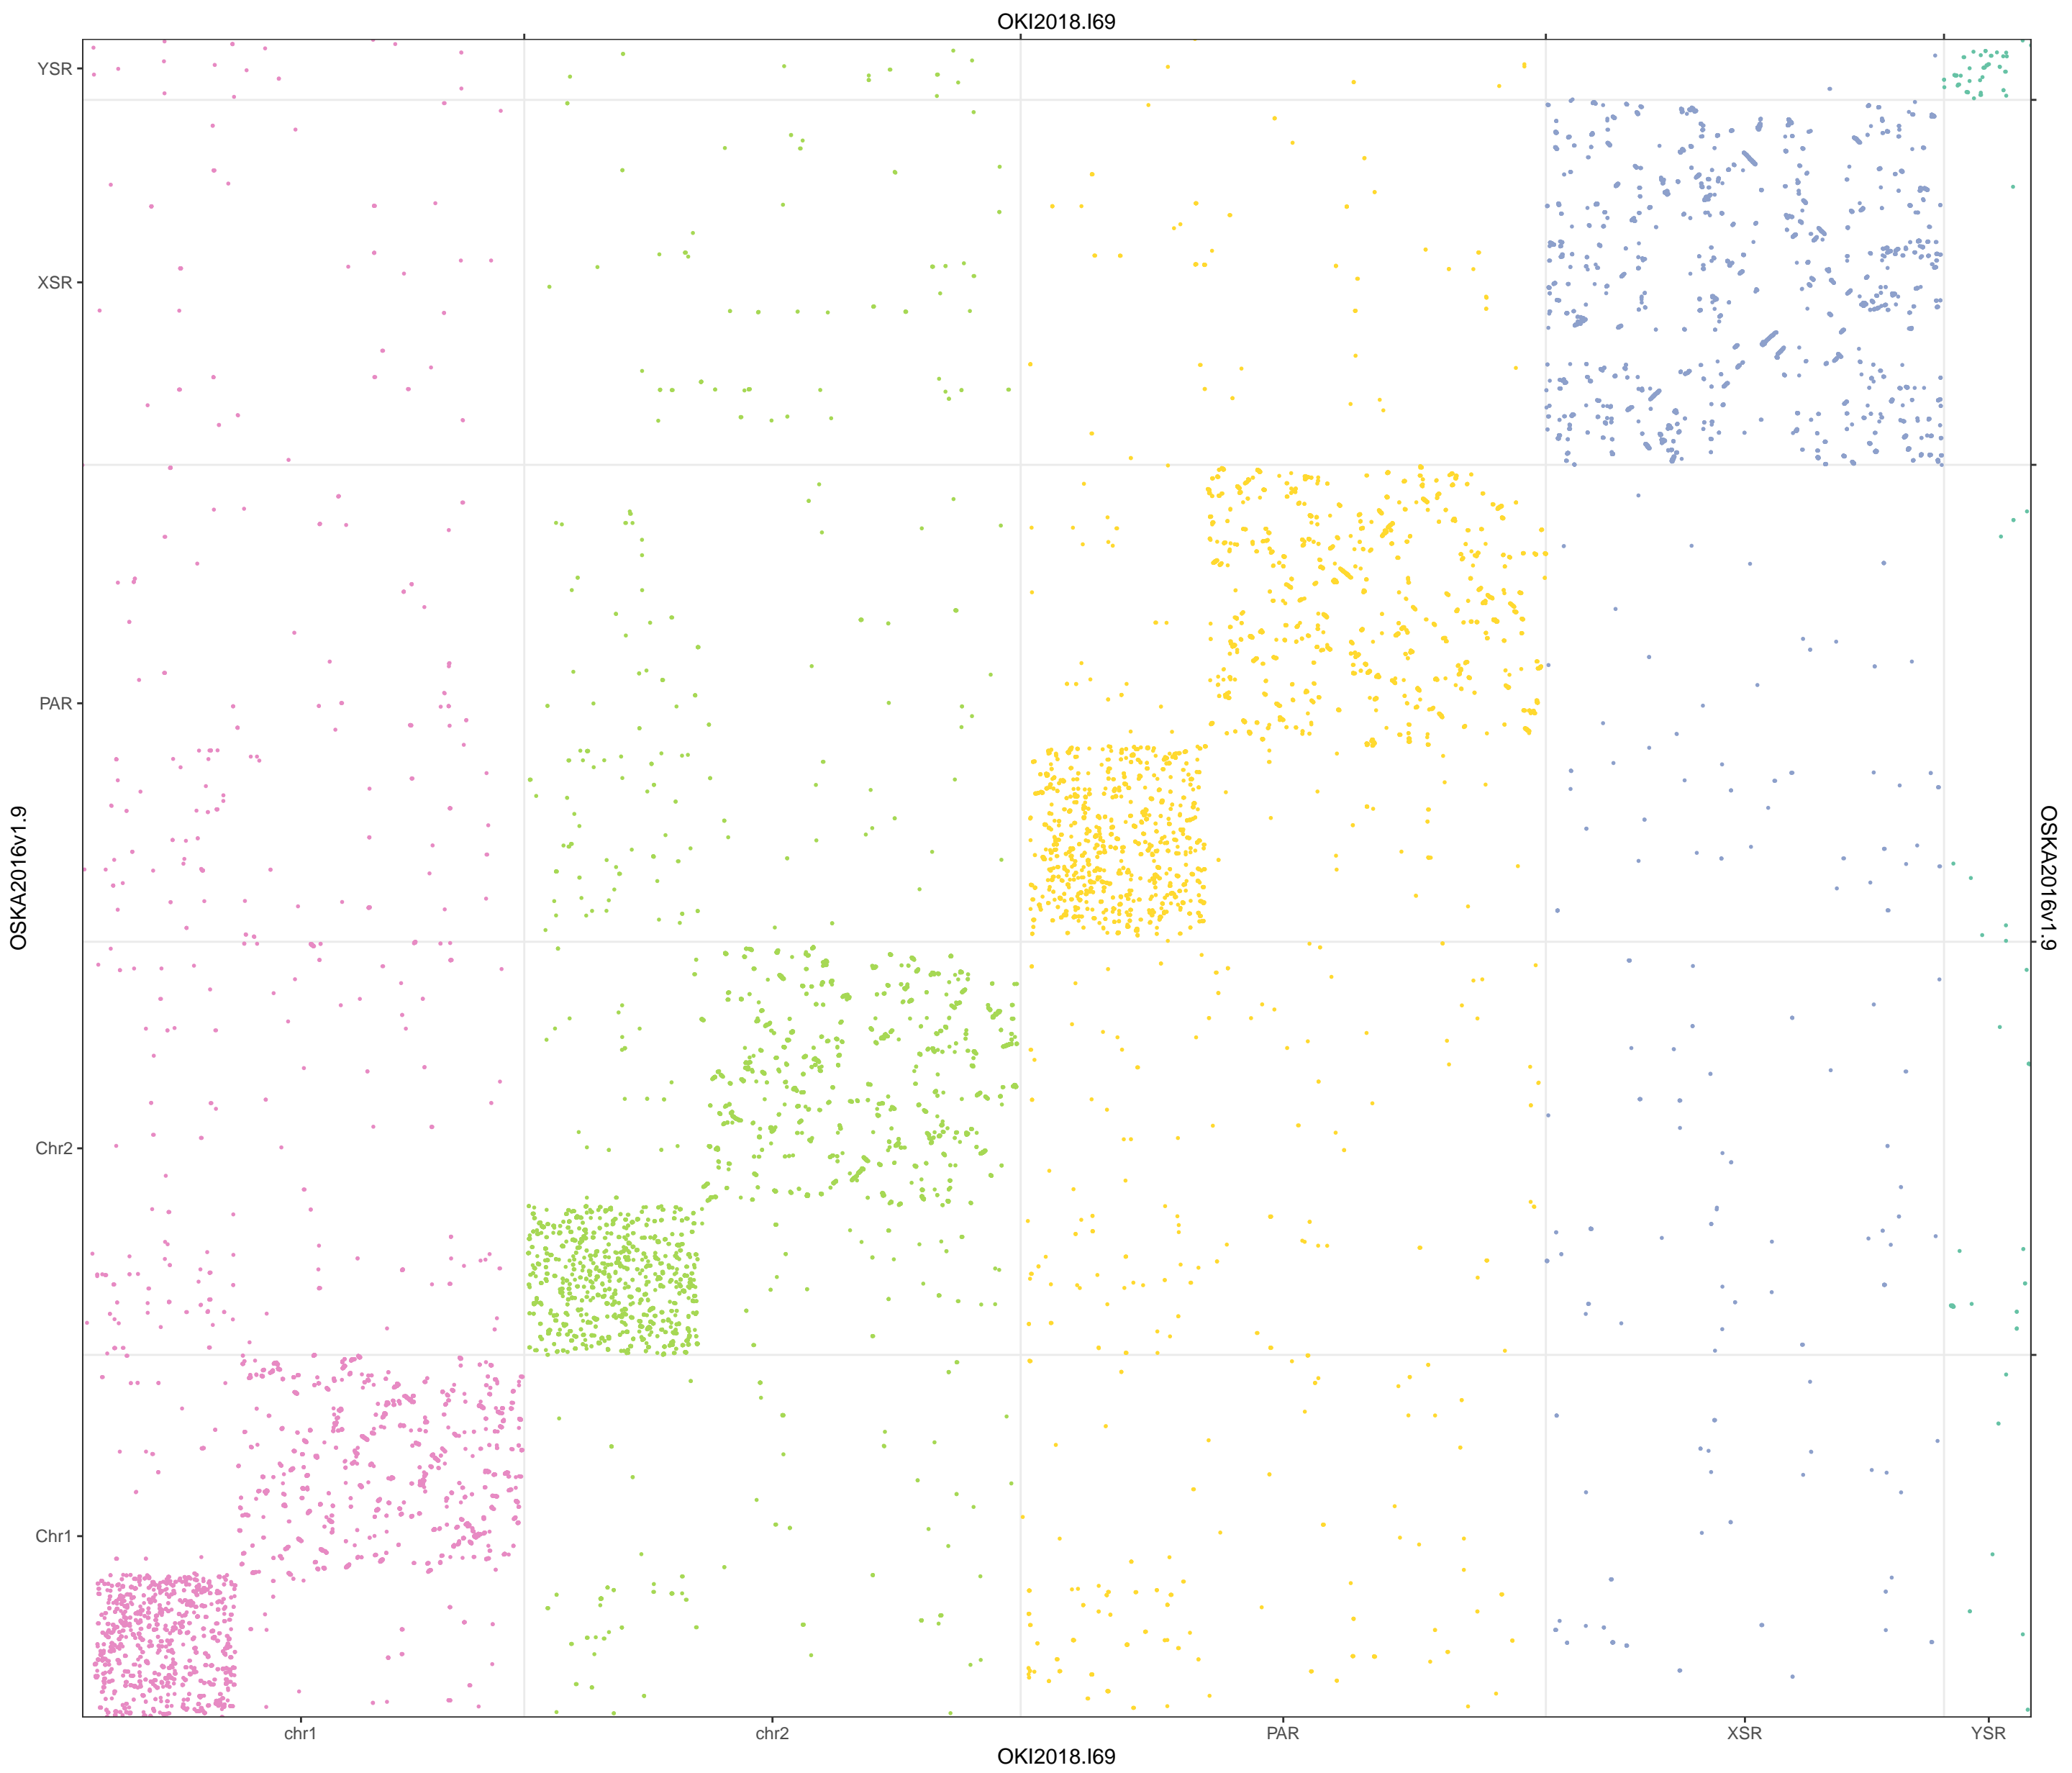

Supplement: Supplemental_Data.zip [file Oki_Osa_gbs-1.pdf › Supplemental_Data/articles/OxfordPlots_files/figure-html/Oki_Osa_gbs-1.pdf]

OKI2018.I69 vs OSKA2016v1.9 macrosynteny plot

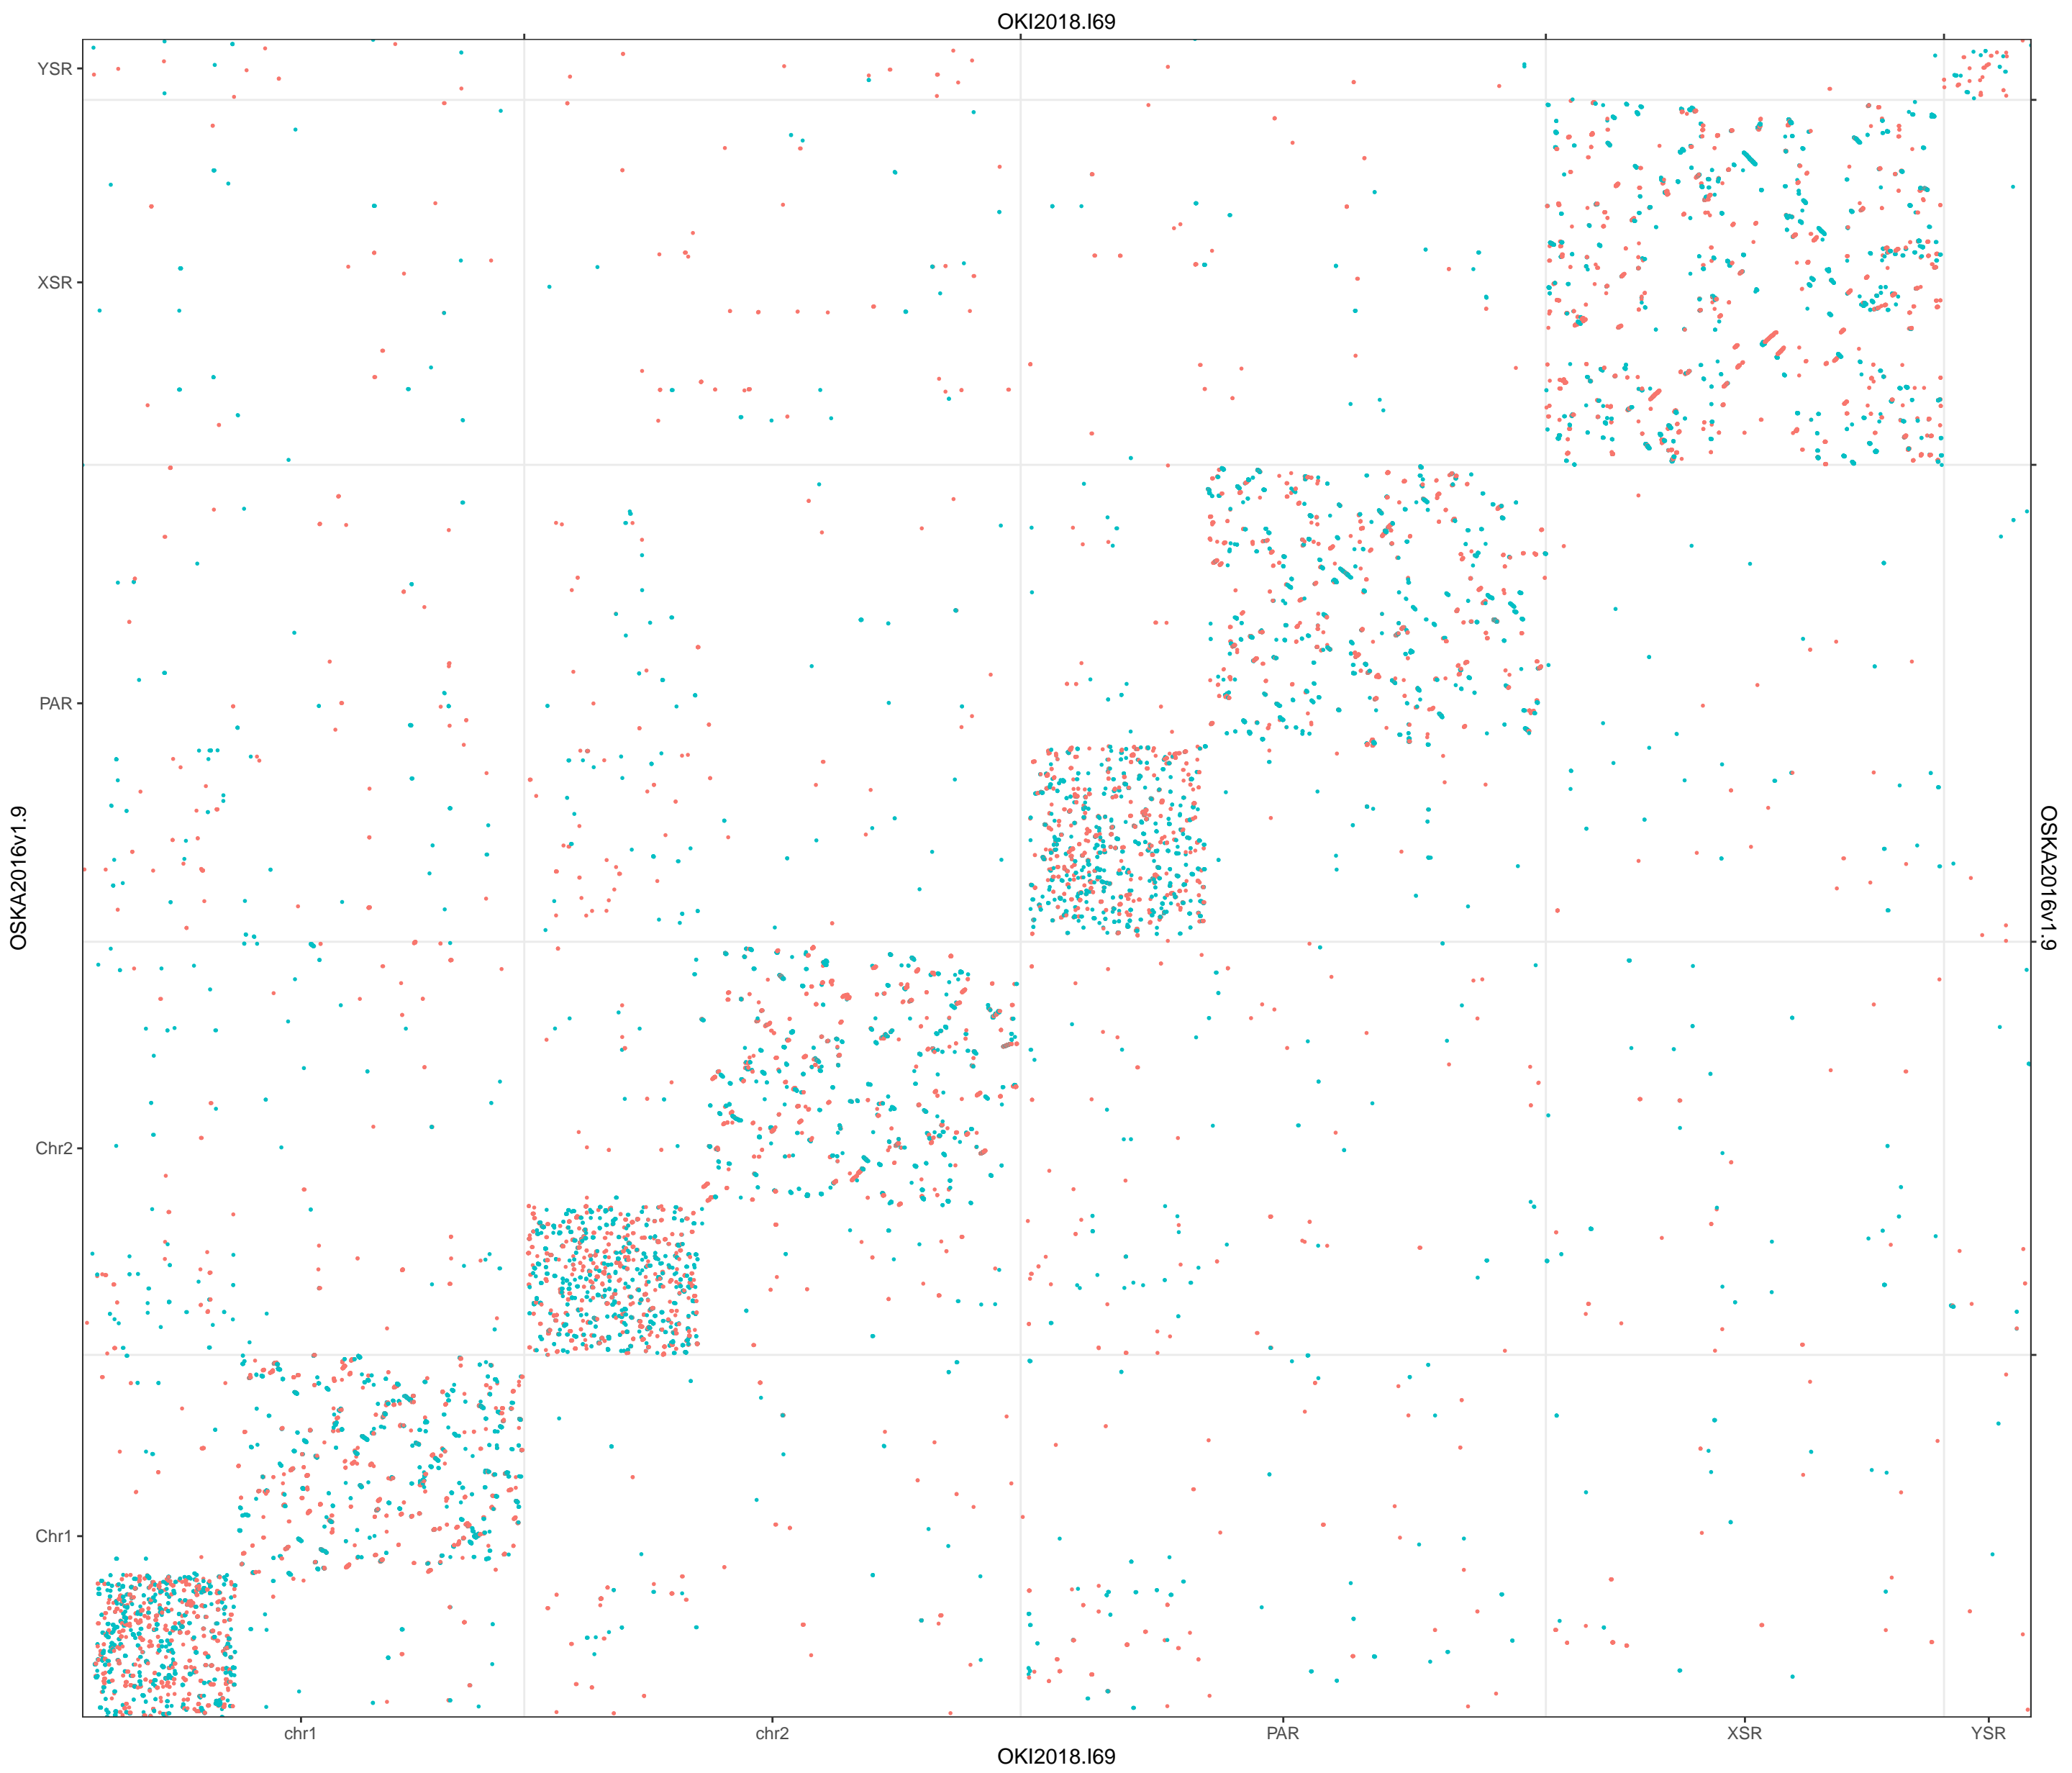

Supplement: Supplemental_Data.zip [file Oki_Osa_strand-1.pdf › Supplemental_Data/articles/OxfordPlots_files/figure-html/Oki_Osa_strand-1.pdf]

OSKA2016v1.9 vs AOM.5.5f macrosynteny plot

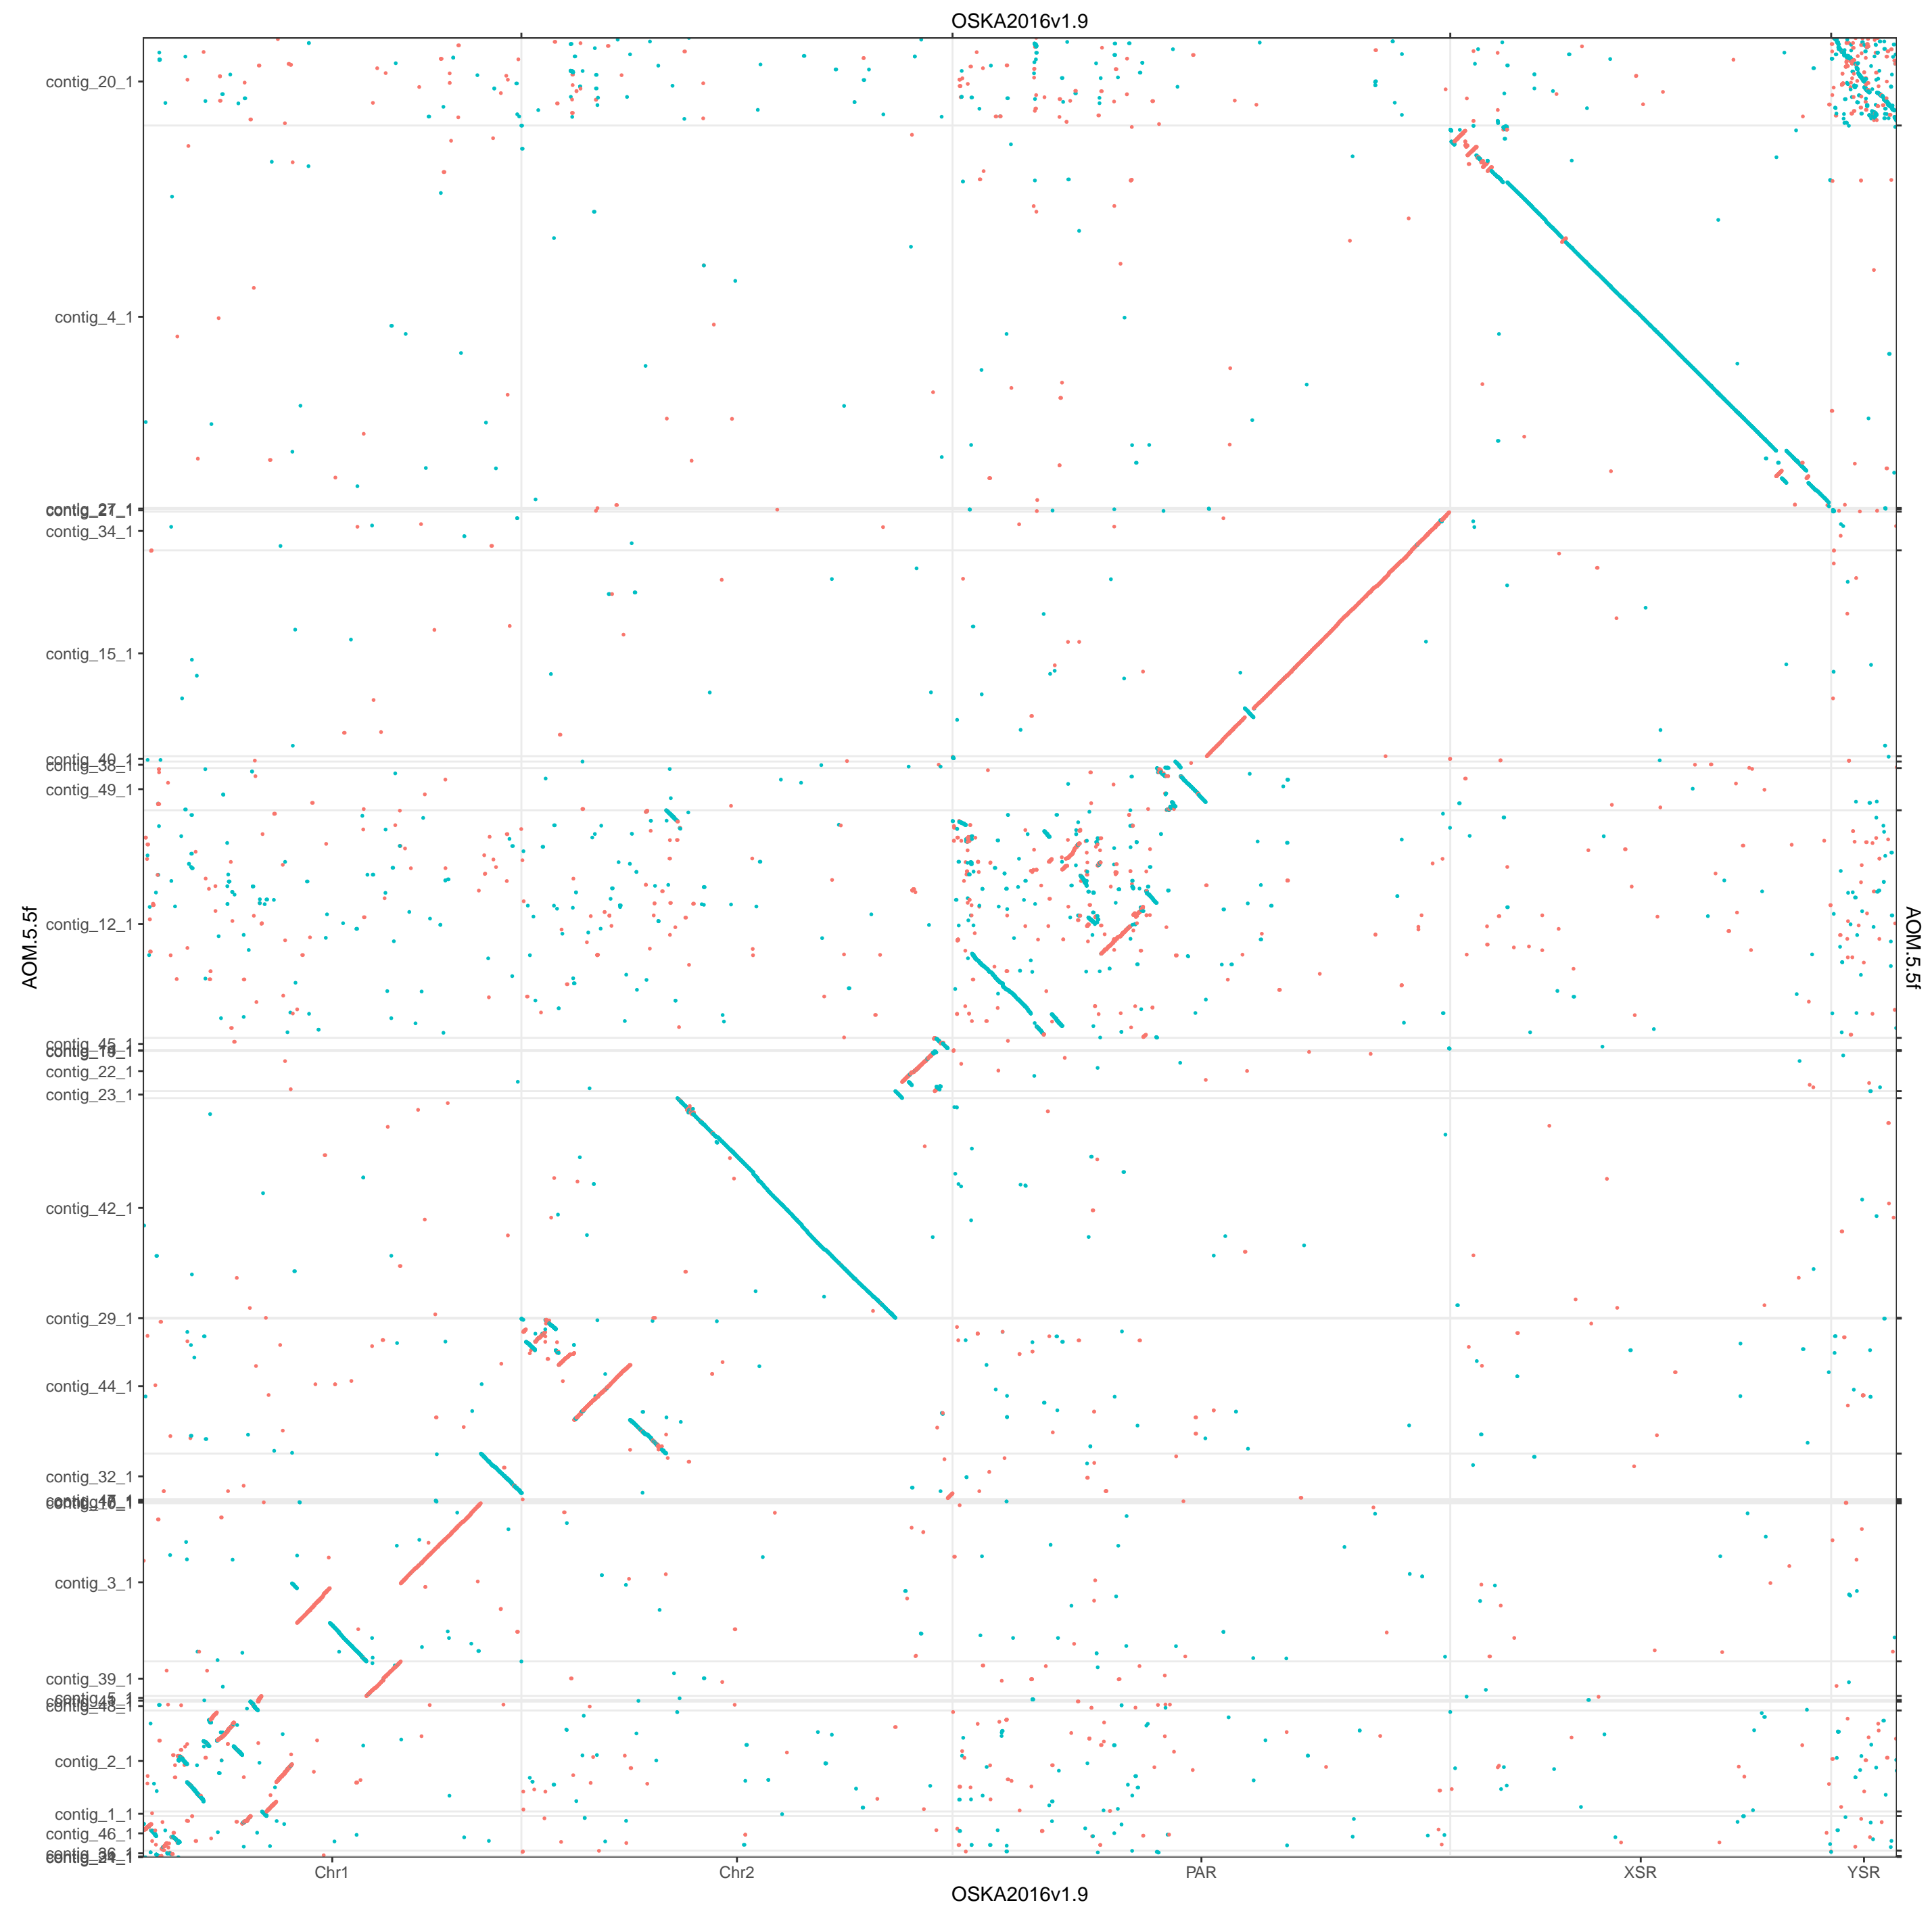

Supplement: Supplemental_Data.zip [file Osa_Aom-1.pdf › Supplemental_Data/articles/OxfordPlots_files/figure-html/Osa_Aom-1.pdf]

OSKA2016v1.9 vs OKI2018.l69 macrosynteny plot

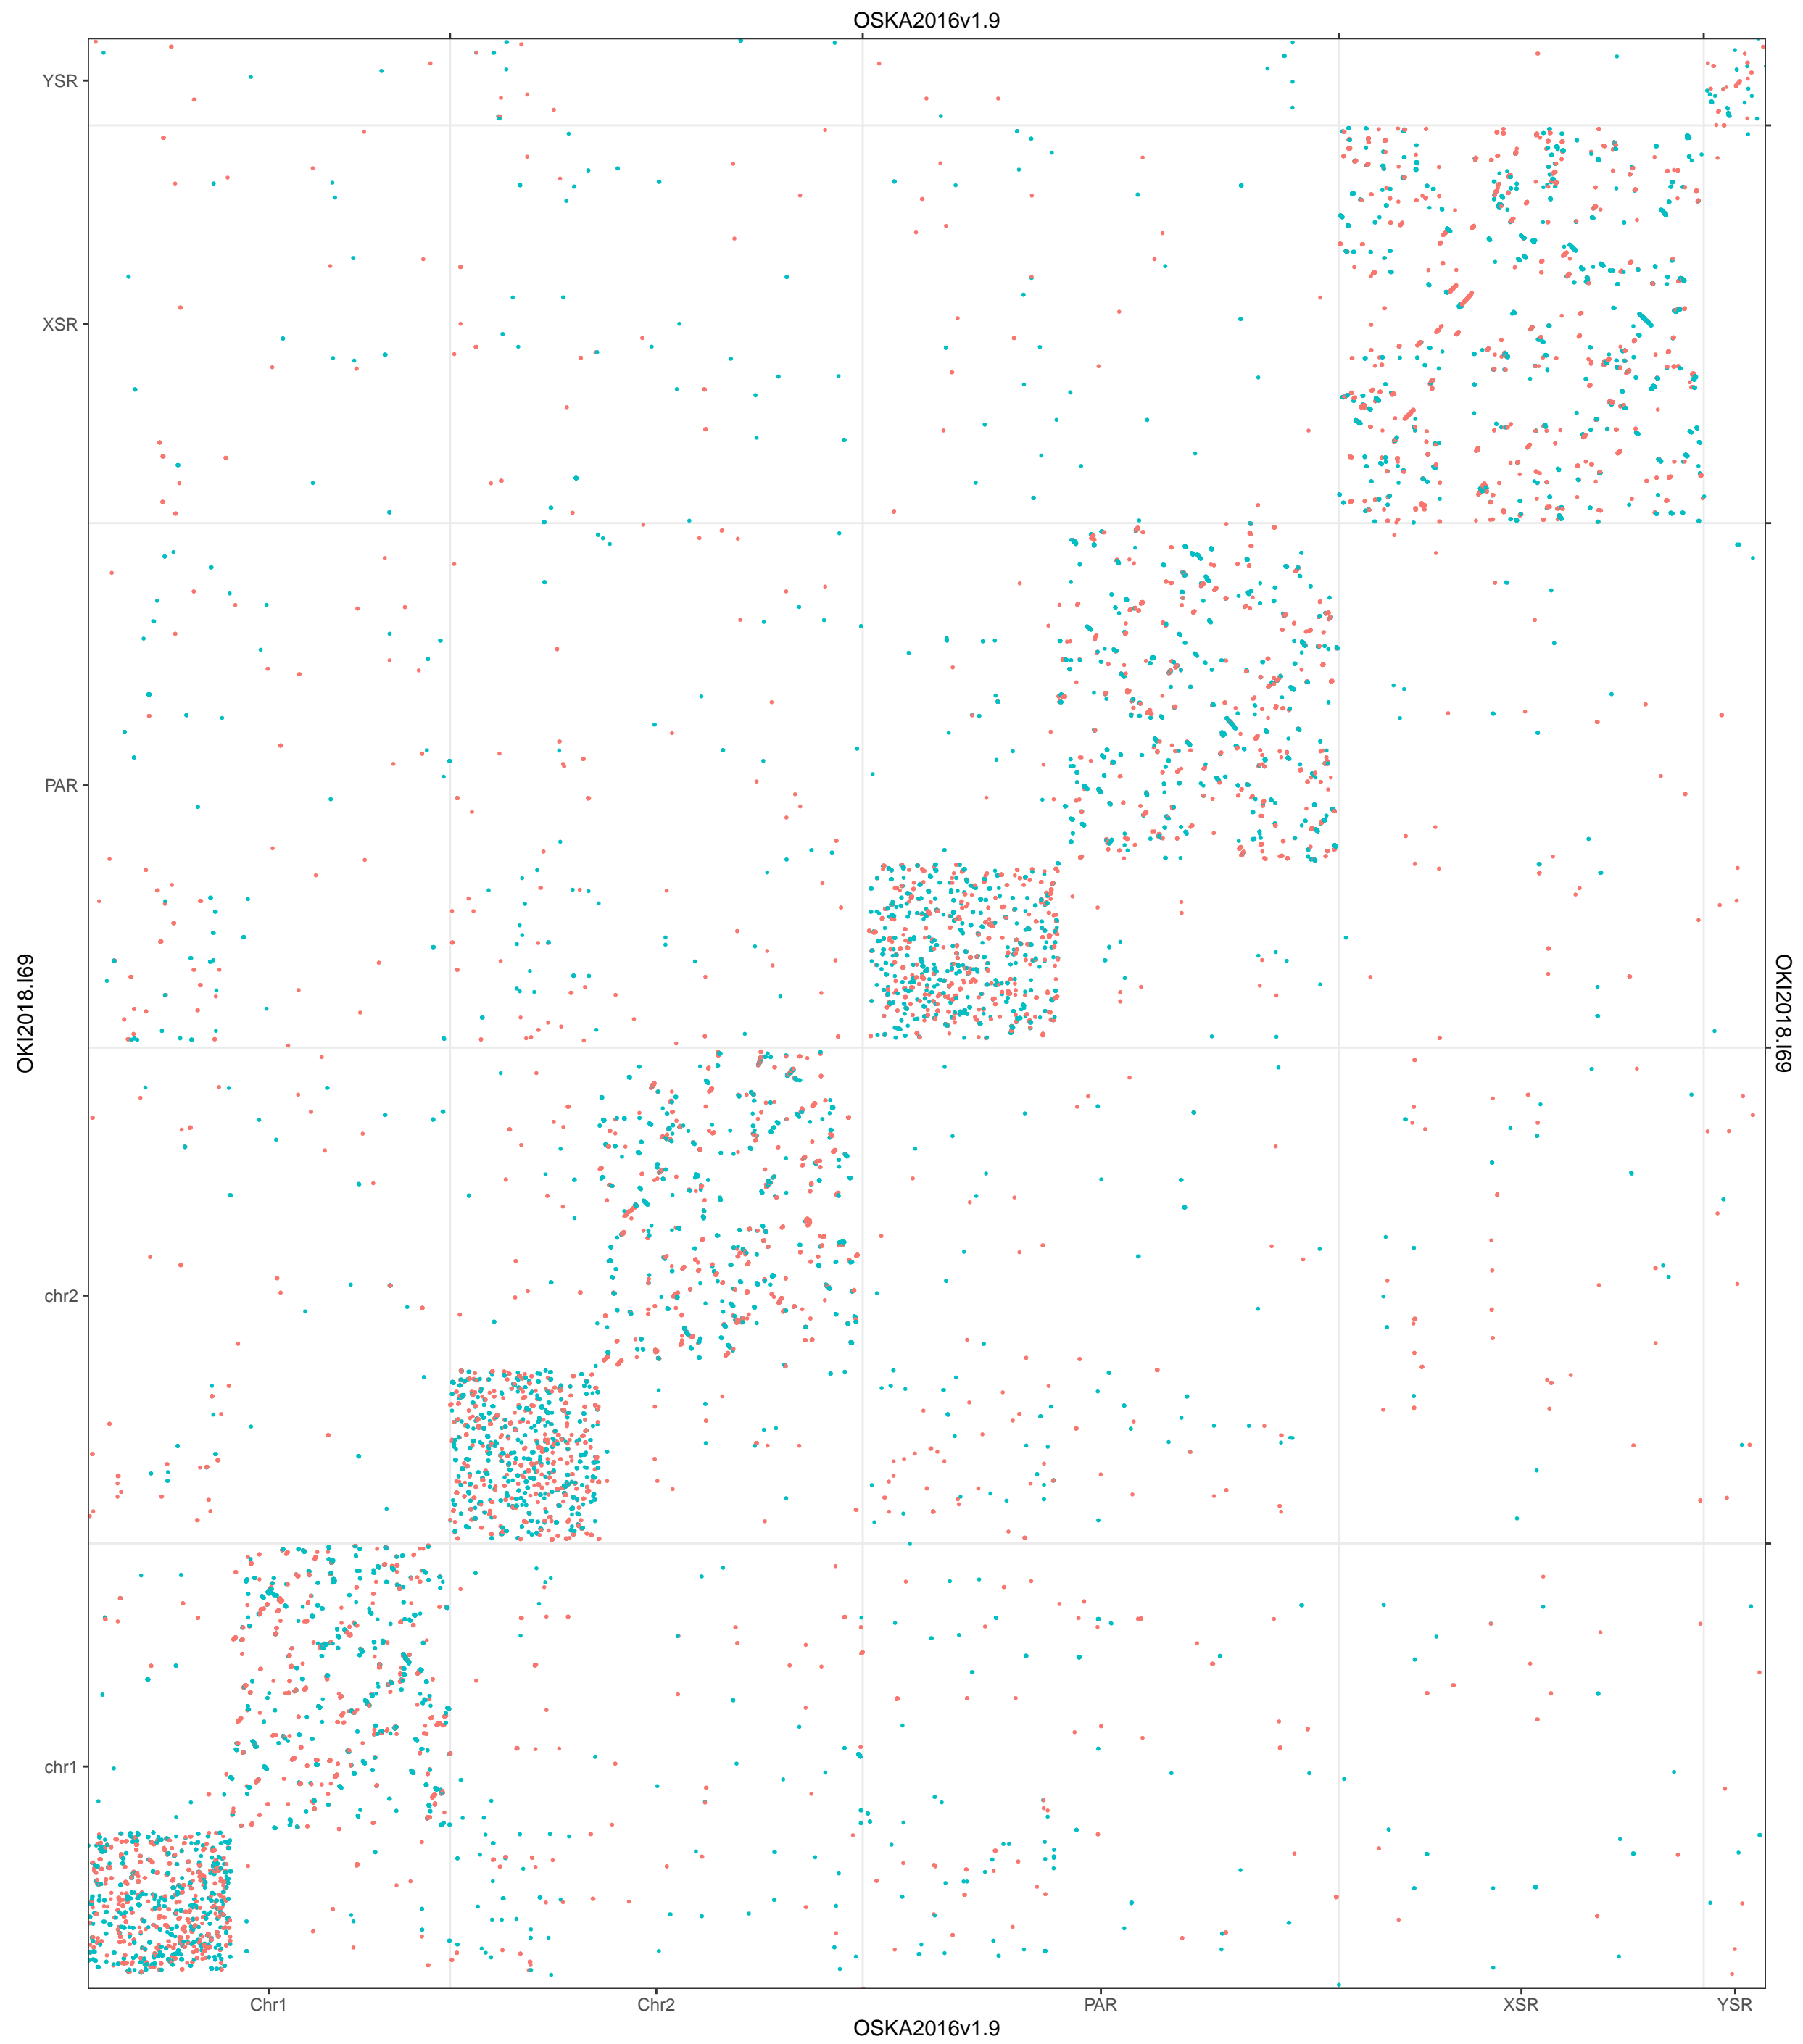

Supplement: Supplemental_Data.zip [file Osa_Oki-1.pdf › Supplemental_Data/articles/OxfordPlots_files/figure-html/Osa_Oki-1.pdf]

OSKA2016v1.9 vs Bar2.p4 macrosynteny plot

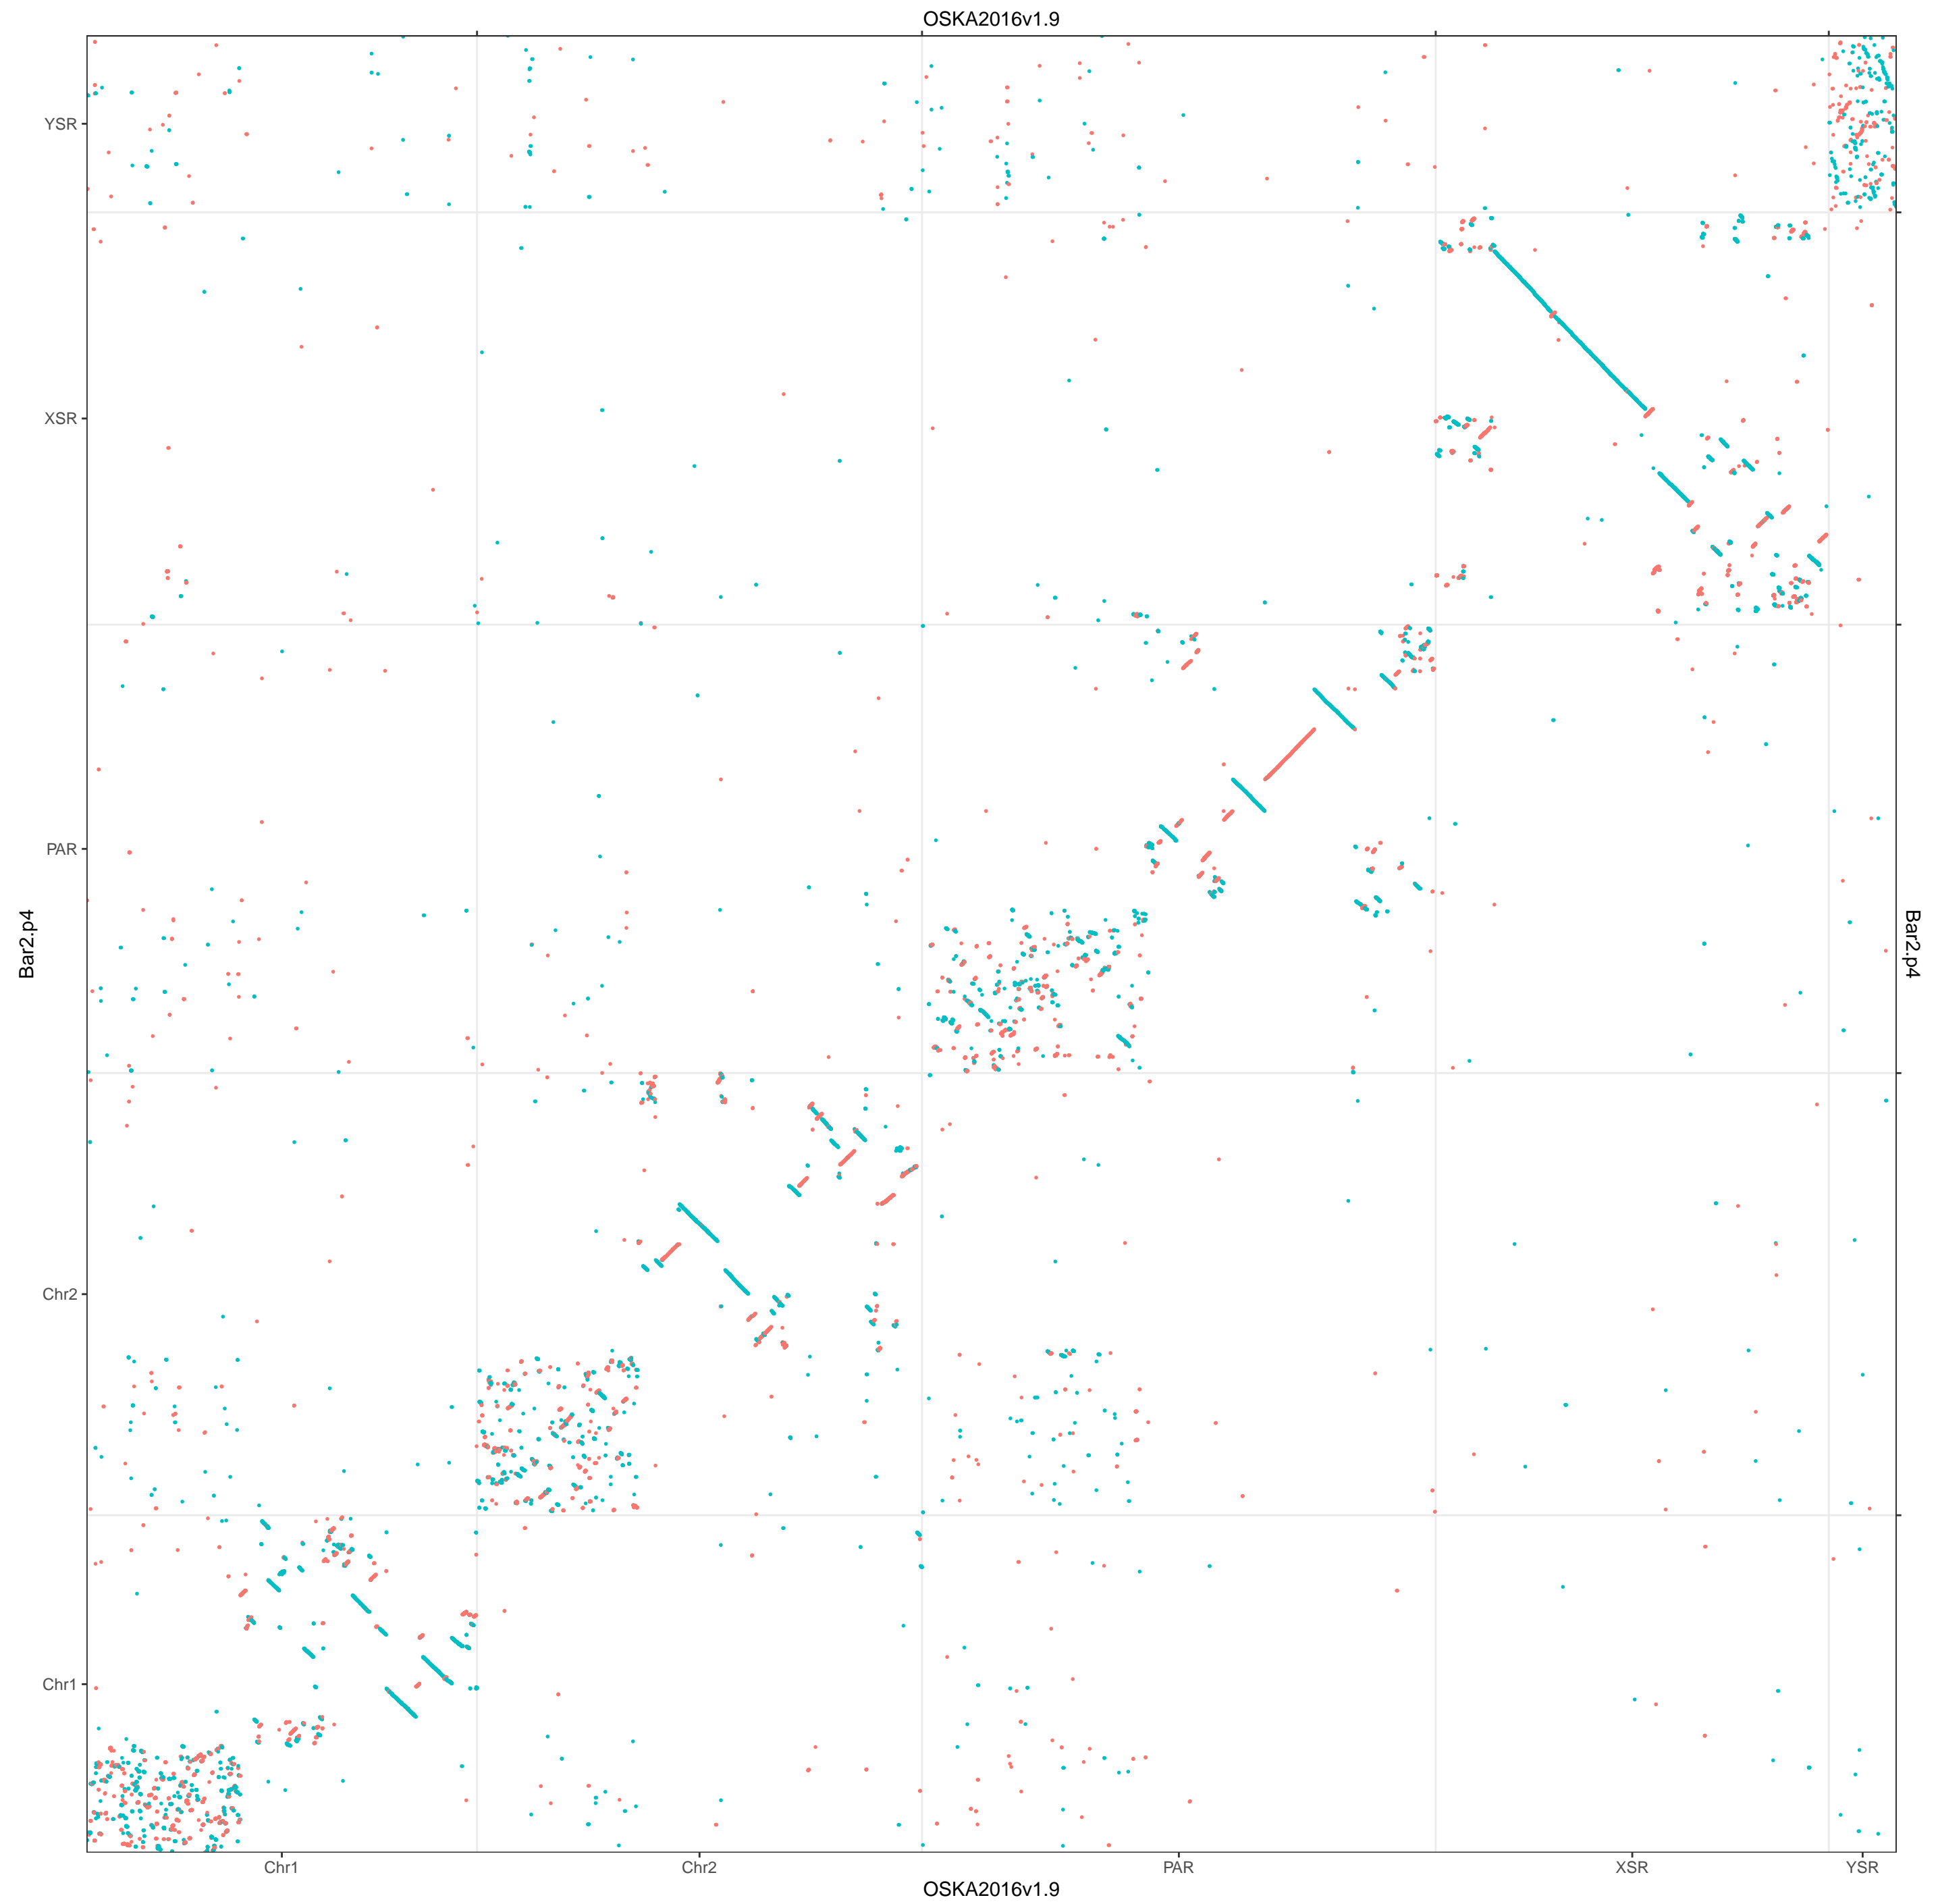

Supplement: Supplemental_Data.zip [file Osa_bar-1.pdf › Supplemental_Data/articles/OxfordPlots_files/figure-html/Osa_bar-1.pdf]

Ciona intestinalis Plymouth vs Ciona robusta

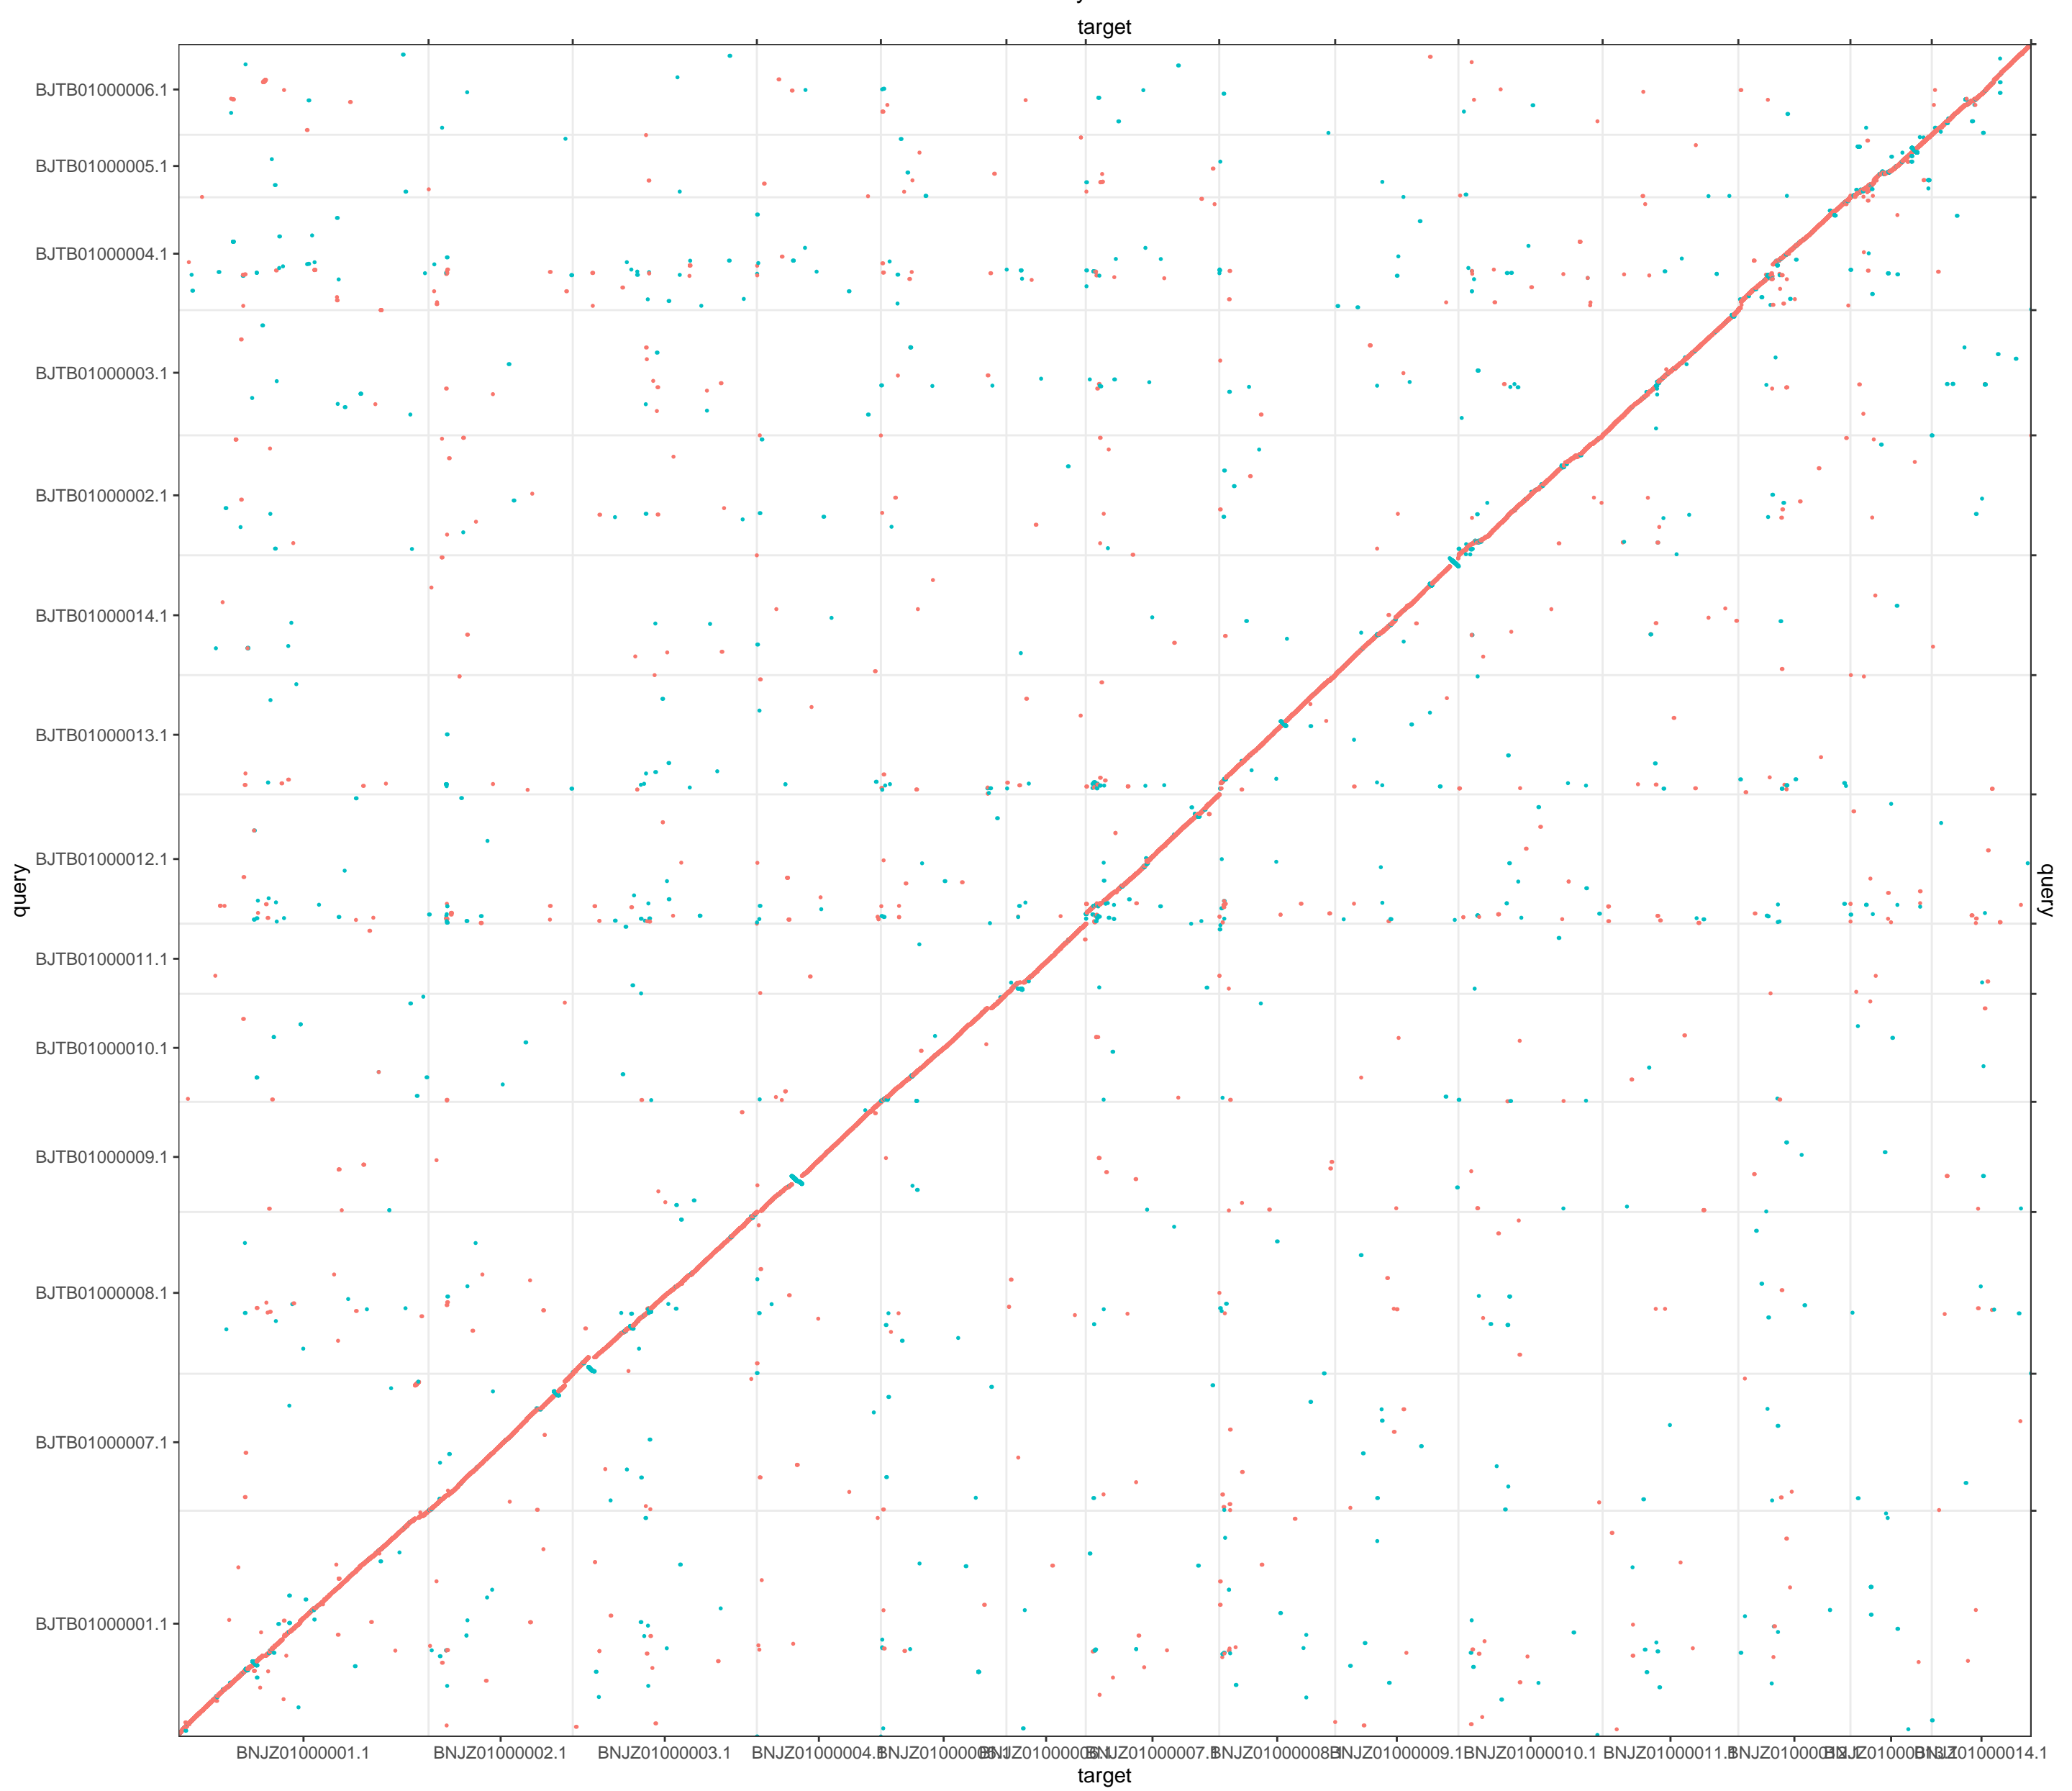

Supplement: Supplemental_Data.zip [file Ply_Rob-1.pdf › Supplemental_Data/articles/OxfordPlots_files/figure-html/Ply_Rob-1.pdf]

Ciona intestinalis Plymouth vs Roscoff

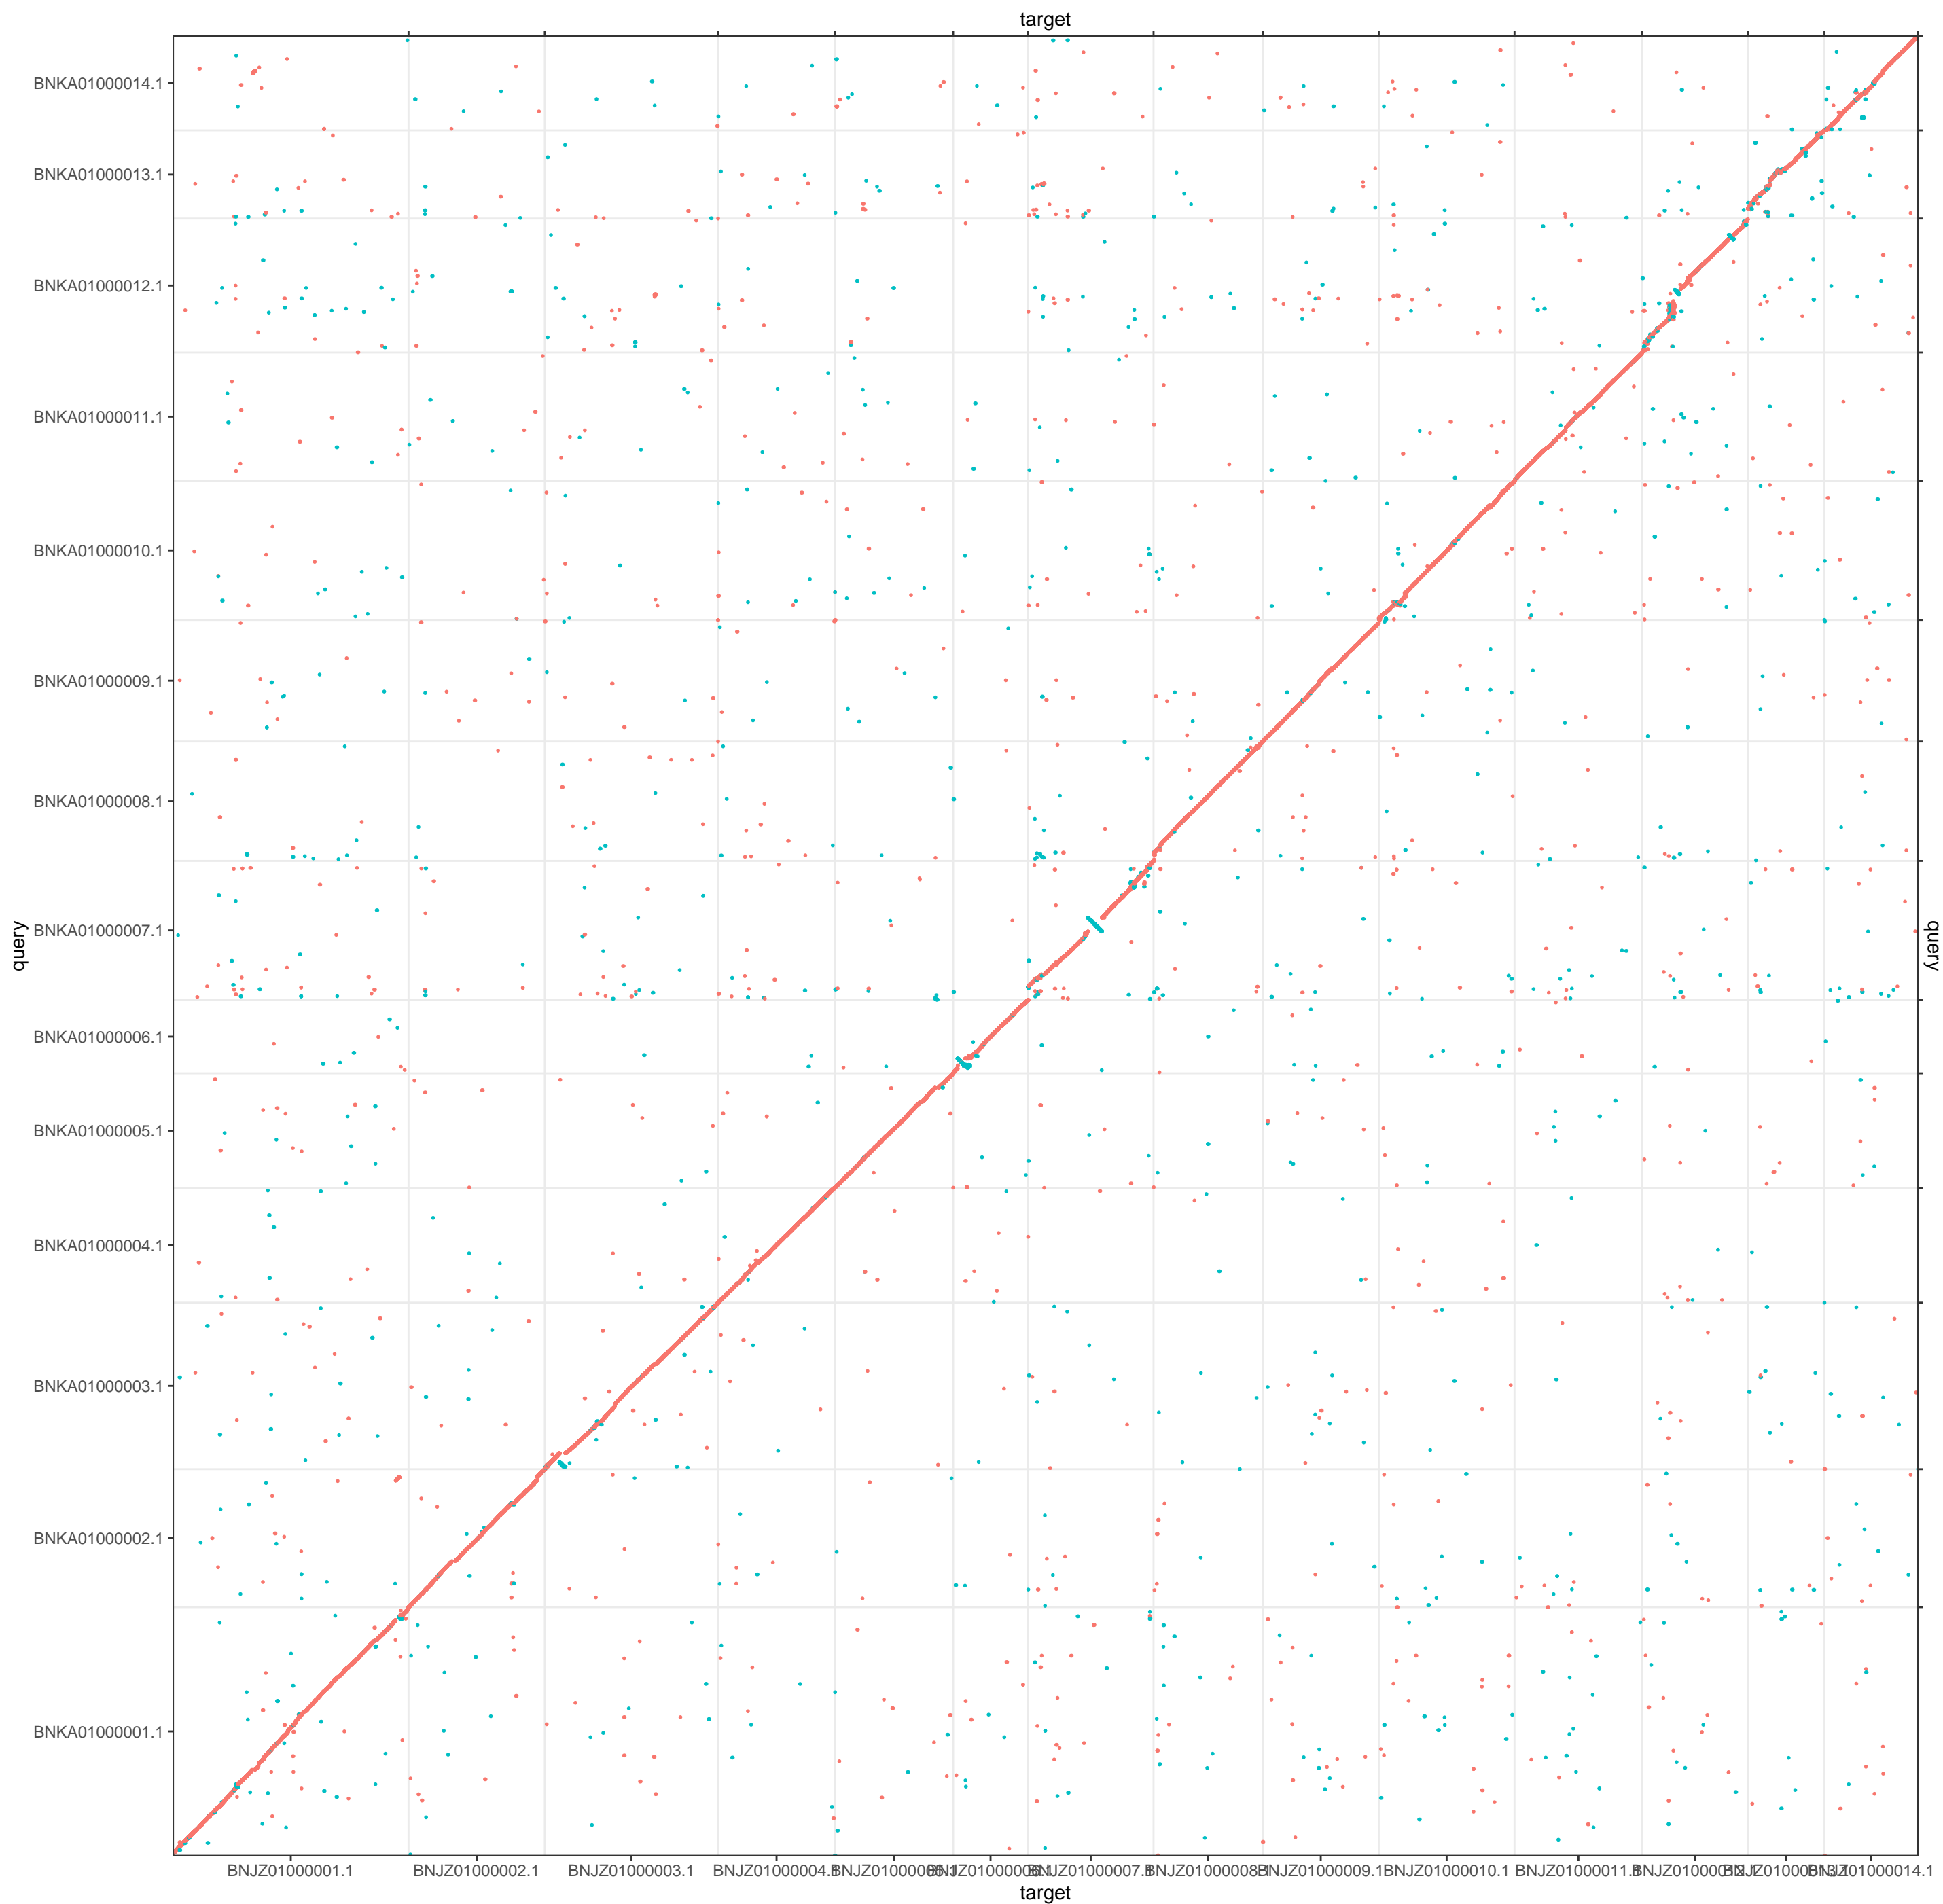

Supplement: Supplemental_Data.zip [file Ply_Ros-1.pdf › Supplemental_Data/articles/OxfordPlots_files/figure-html/Ply_Ros-1.pdf]

## Ciona intestinalis Plymouth vs Ciona savignyi

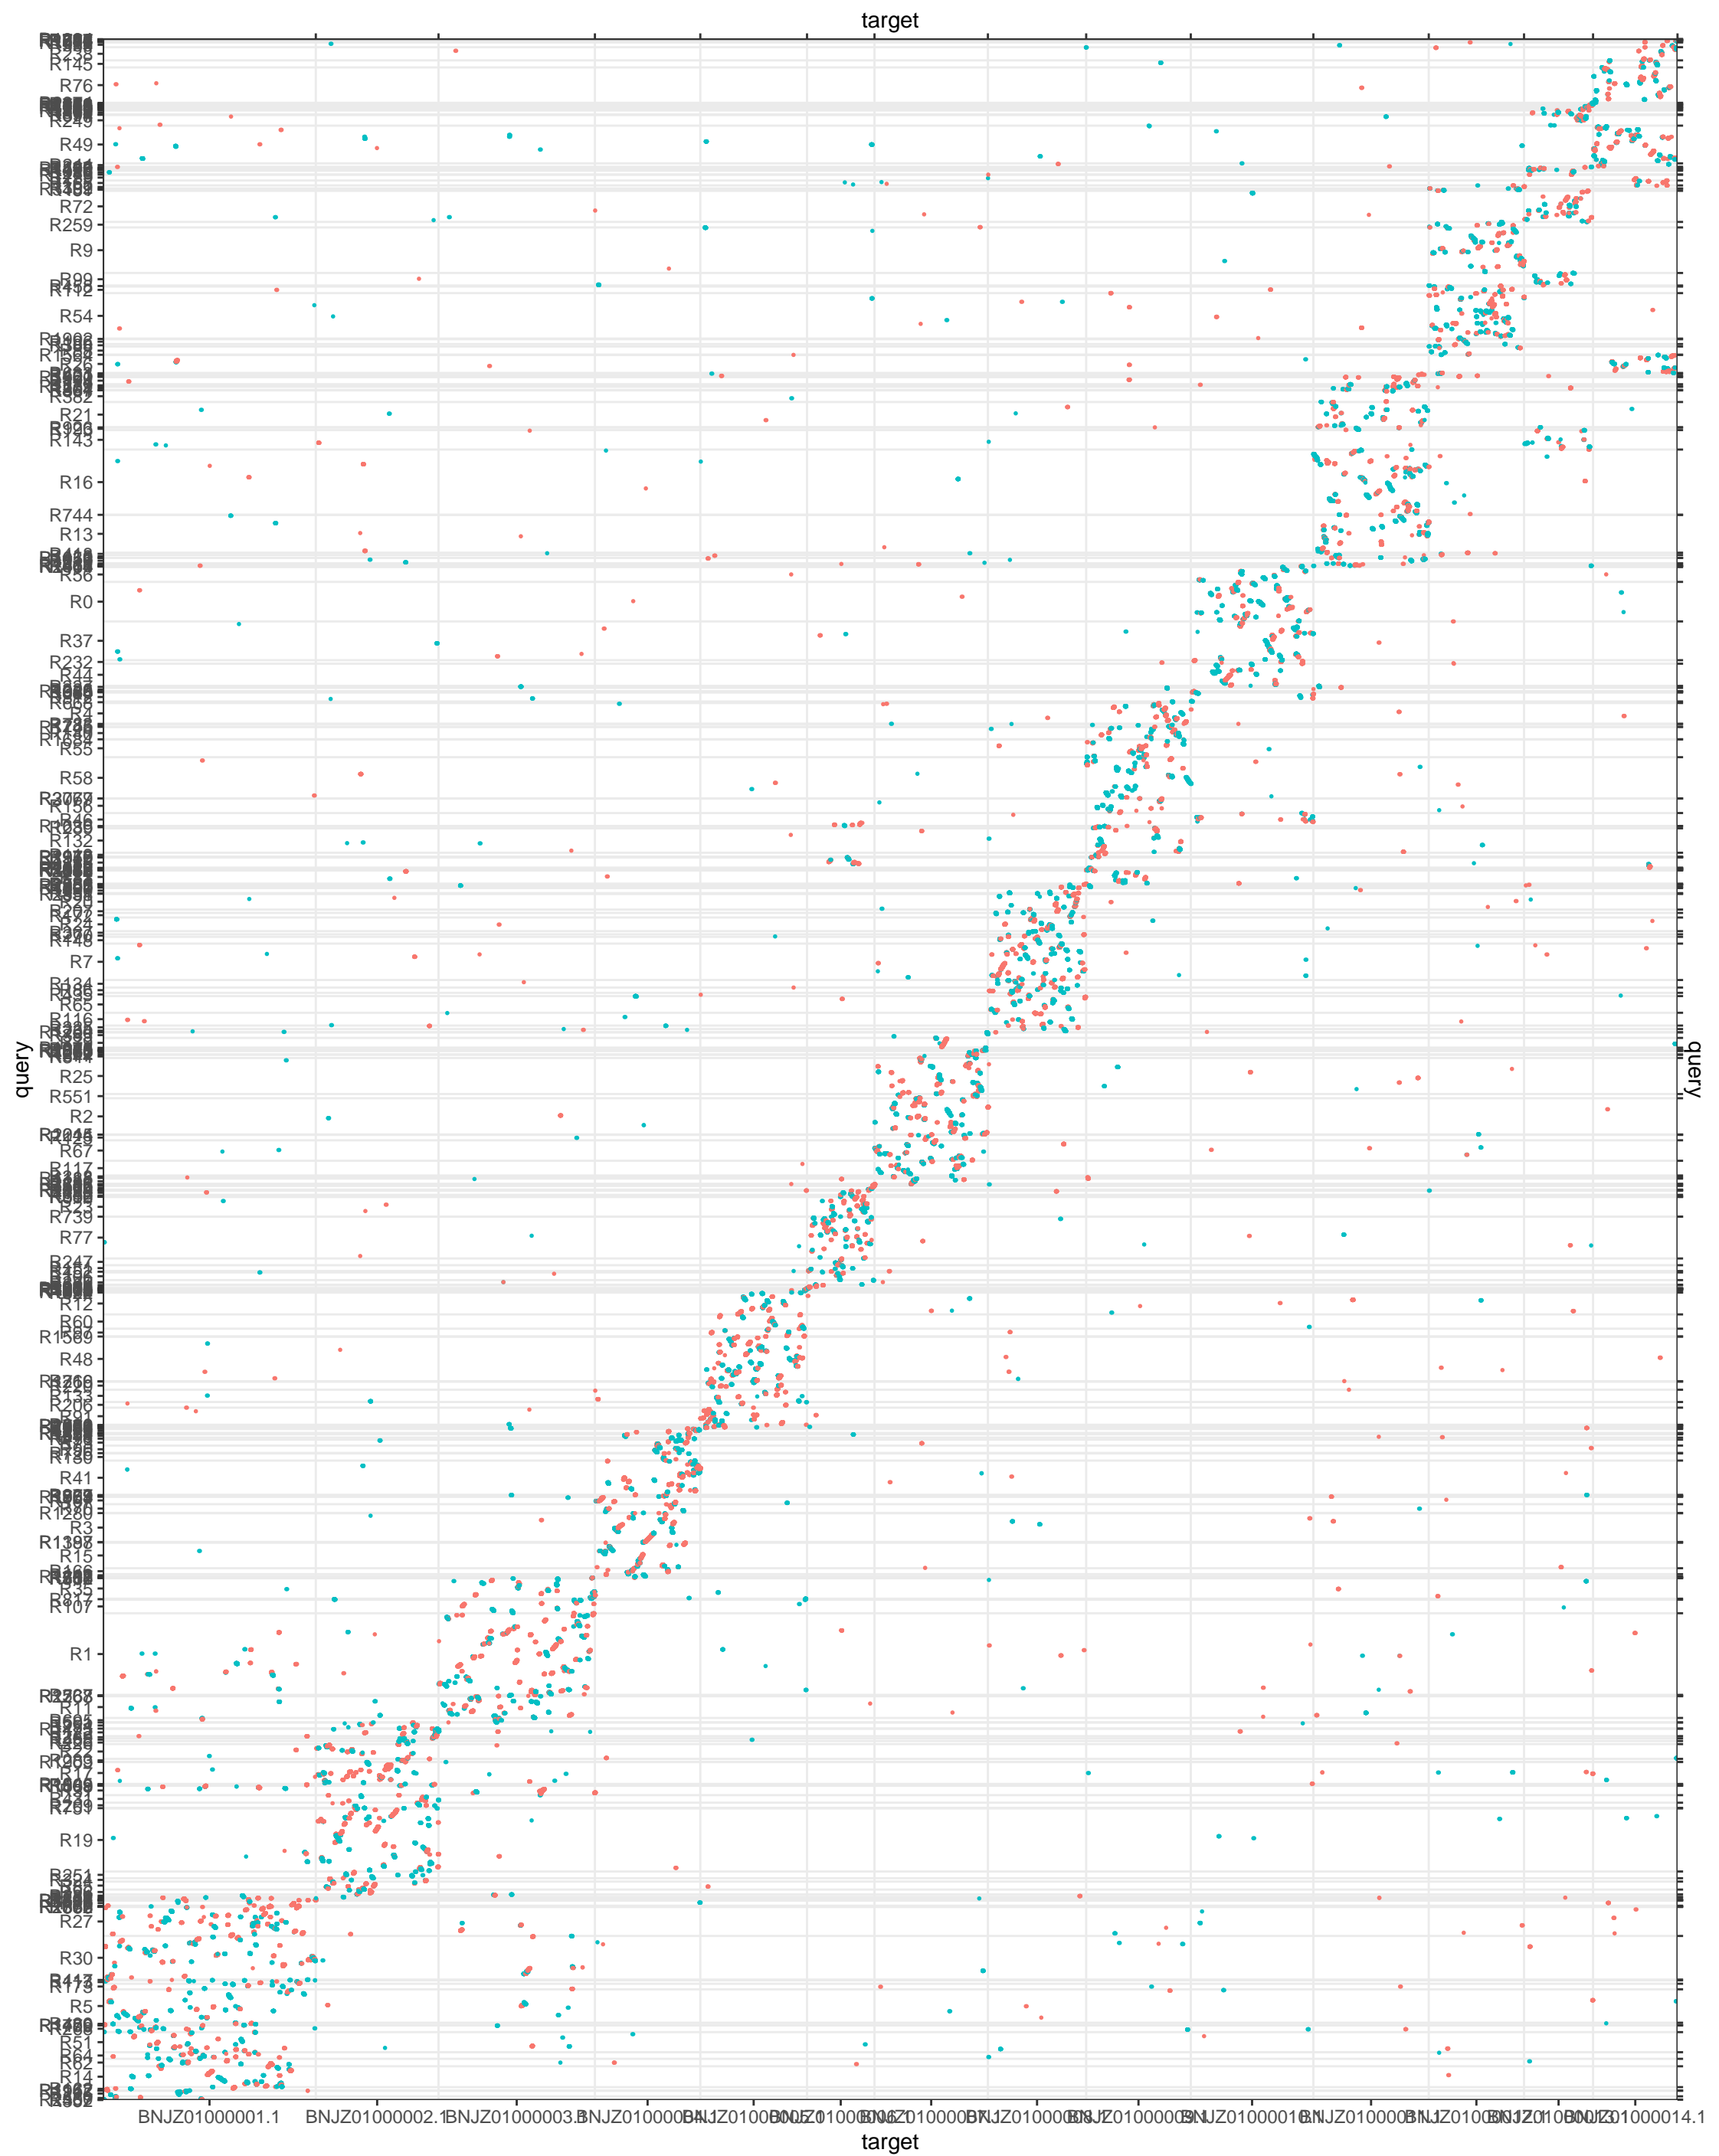

Supplement: Supplemental_Data.zip [file Ply_Sav-1.pdf › Supplemental_Data/articles/OxfordPlots_files/figure-html/Ply_Sav-1.pdf]

## Homo sapiens vs Mus musculus

chr18

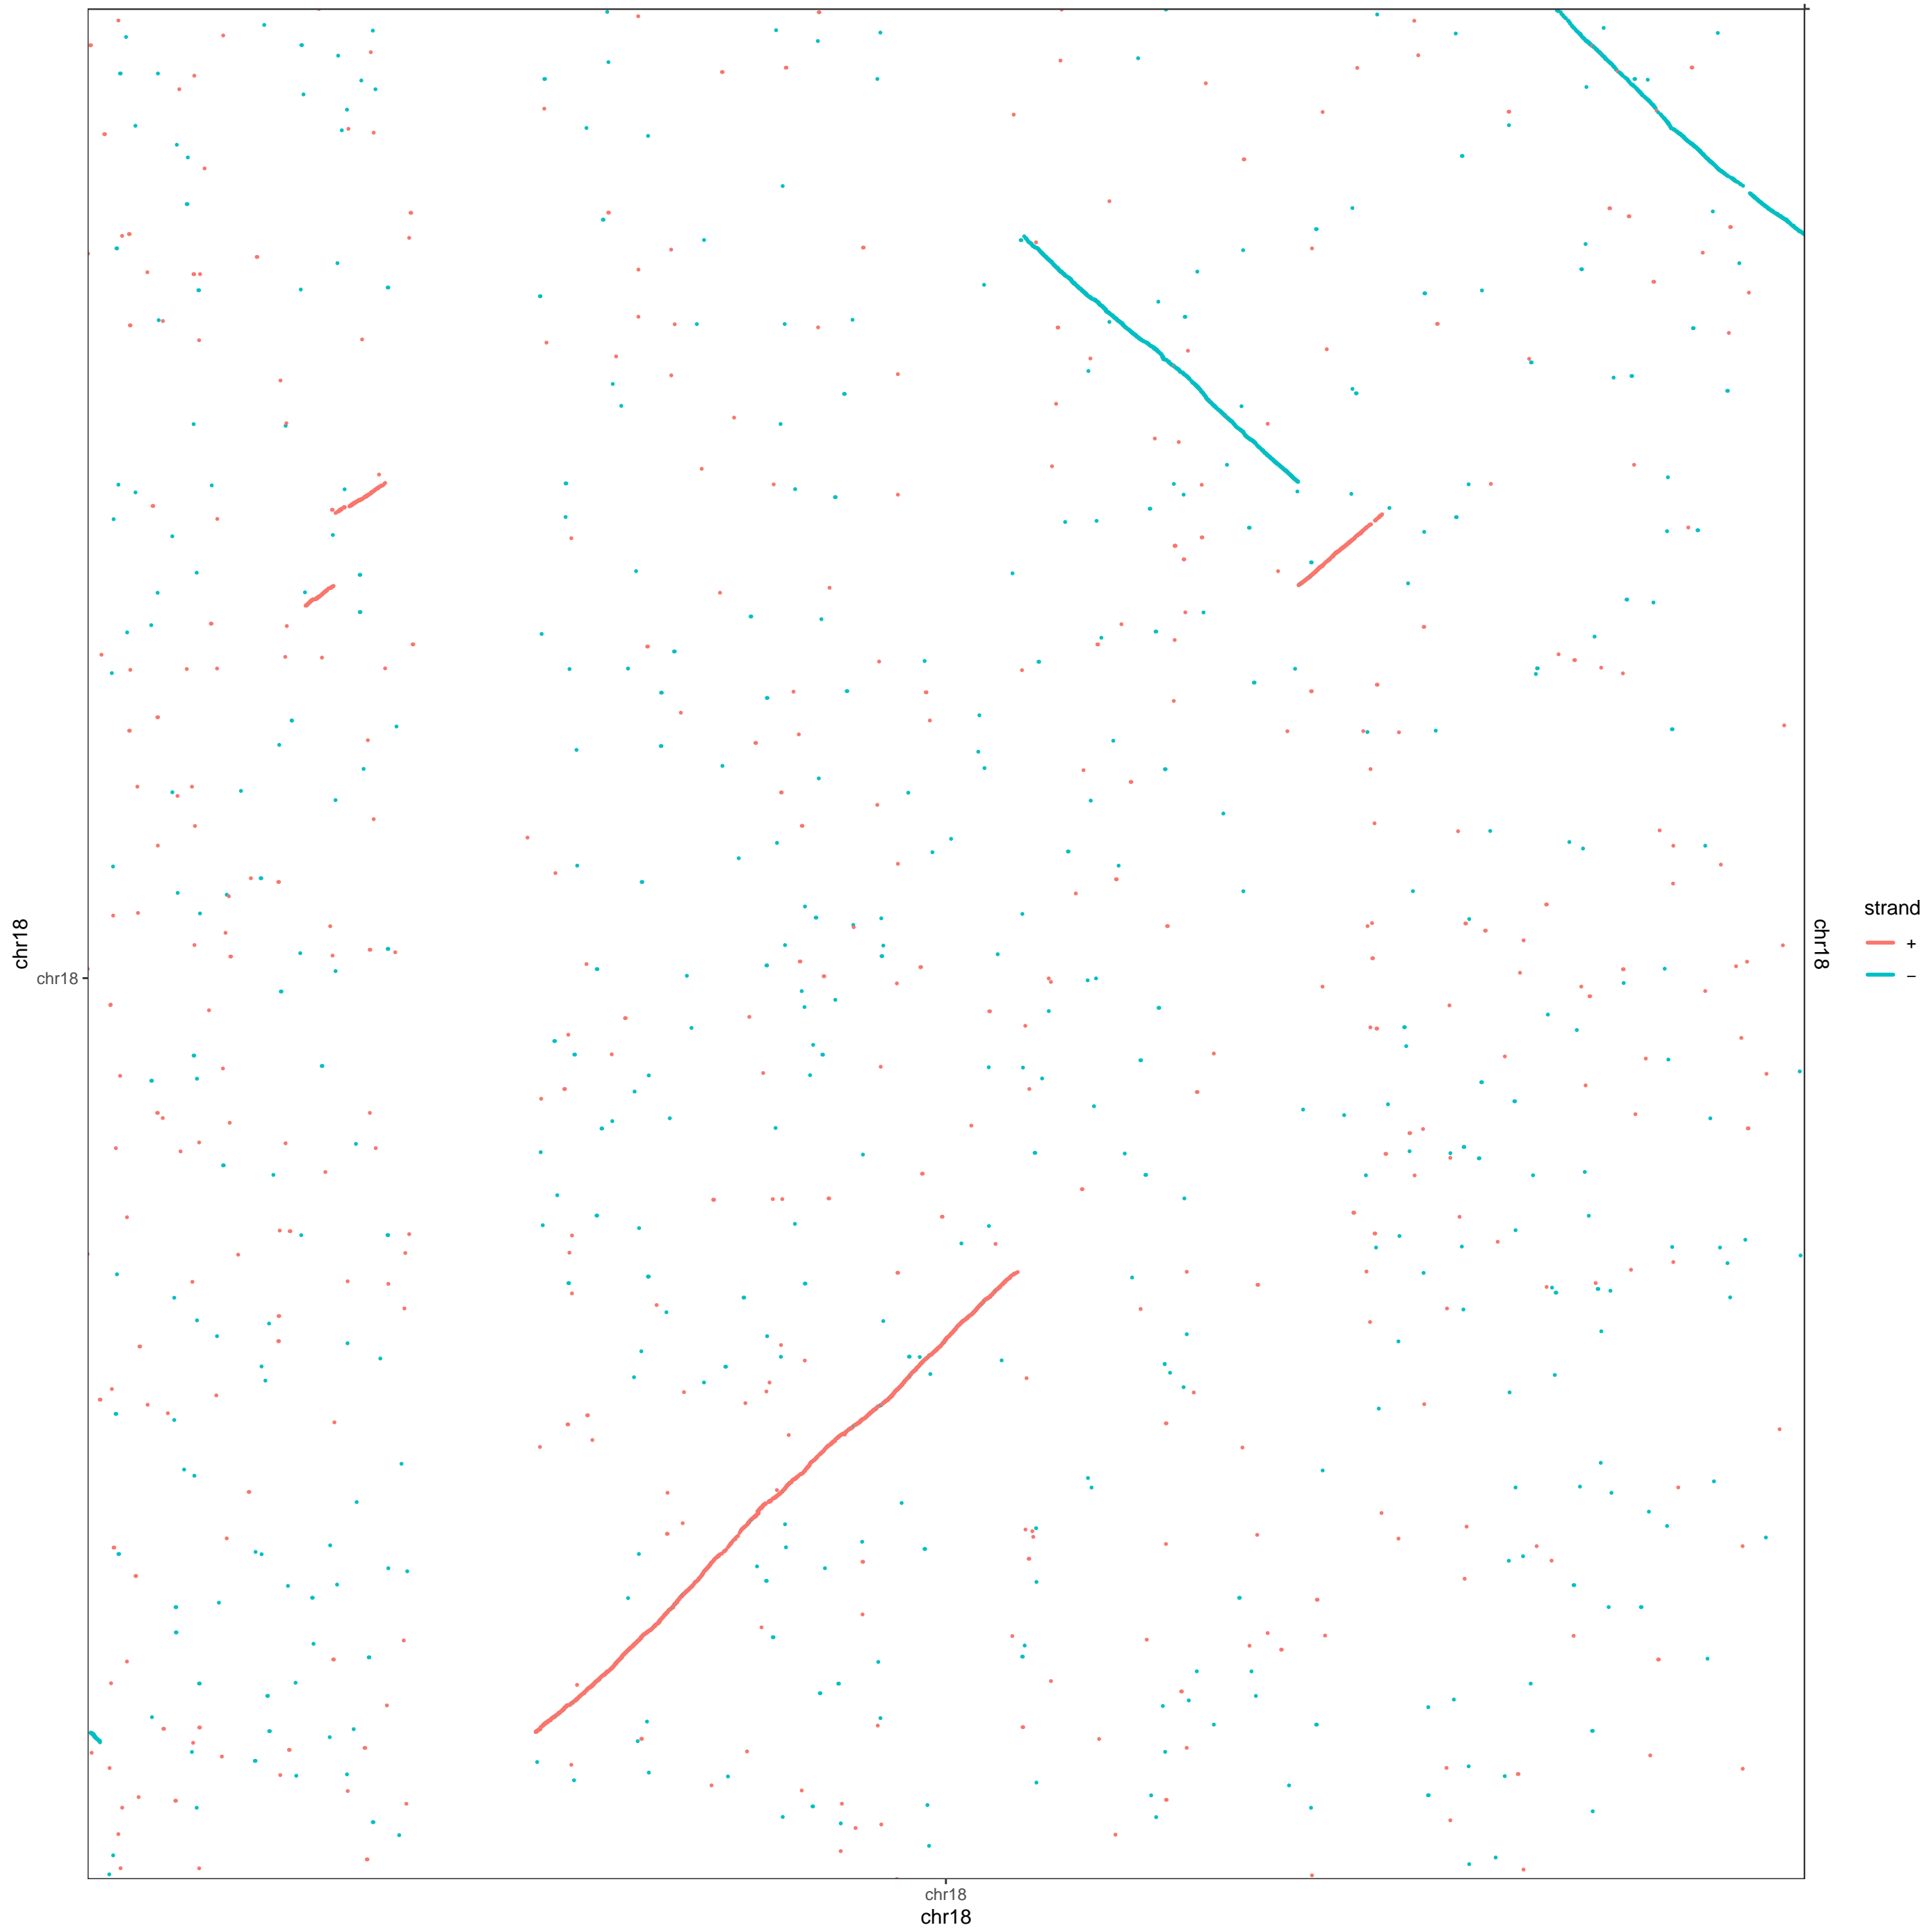

Supplement: Supplemental_Data.zip [file hg38_mm10-1.pdf › Supplemental_Data/articles/OxfordPlots_files/figure-html/hg38_mm10-1.pdf]

# Chromosome 2 in four *Oikopleura* genome assemblies

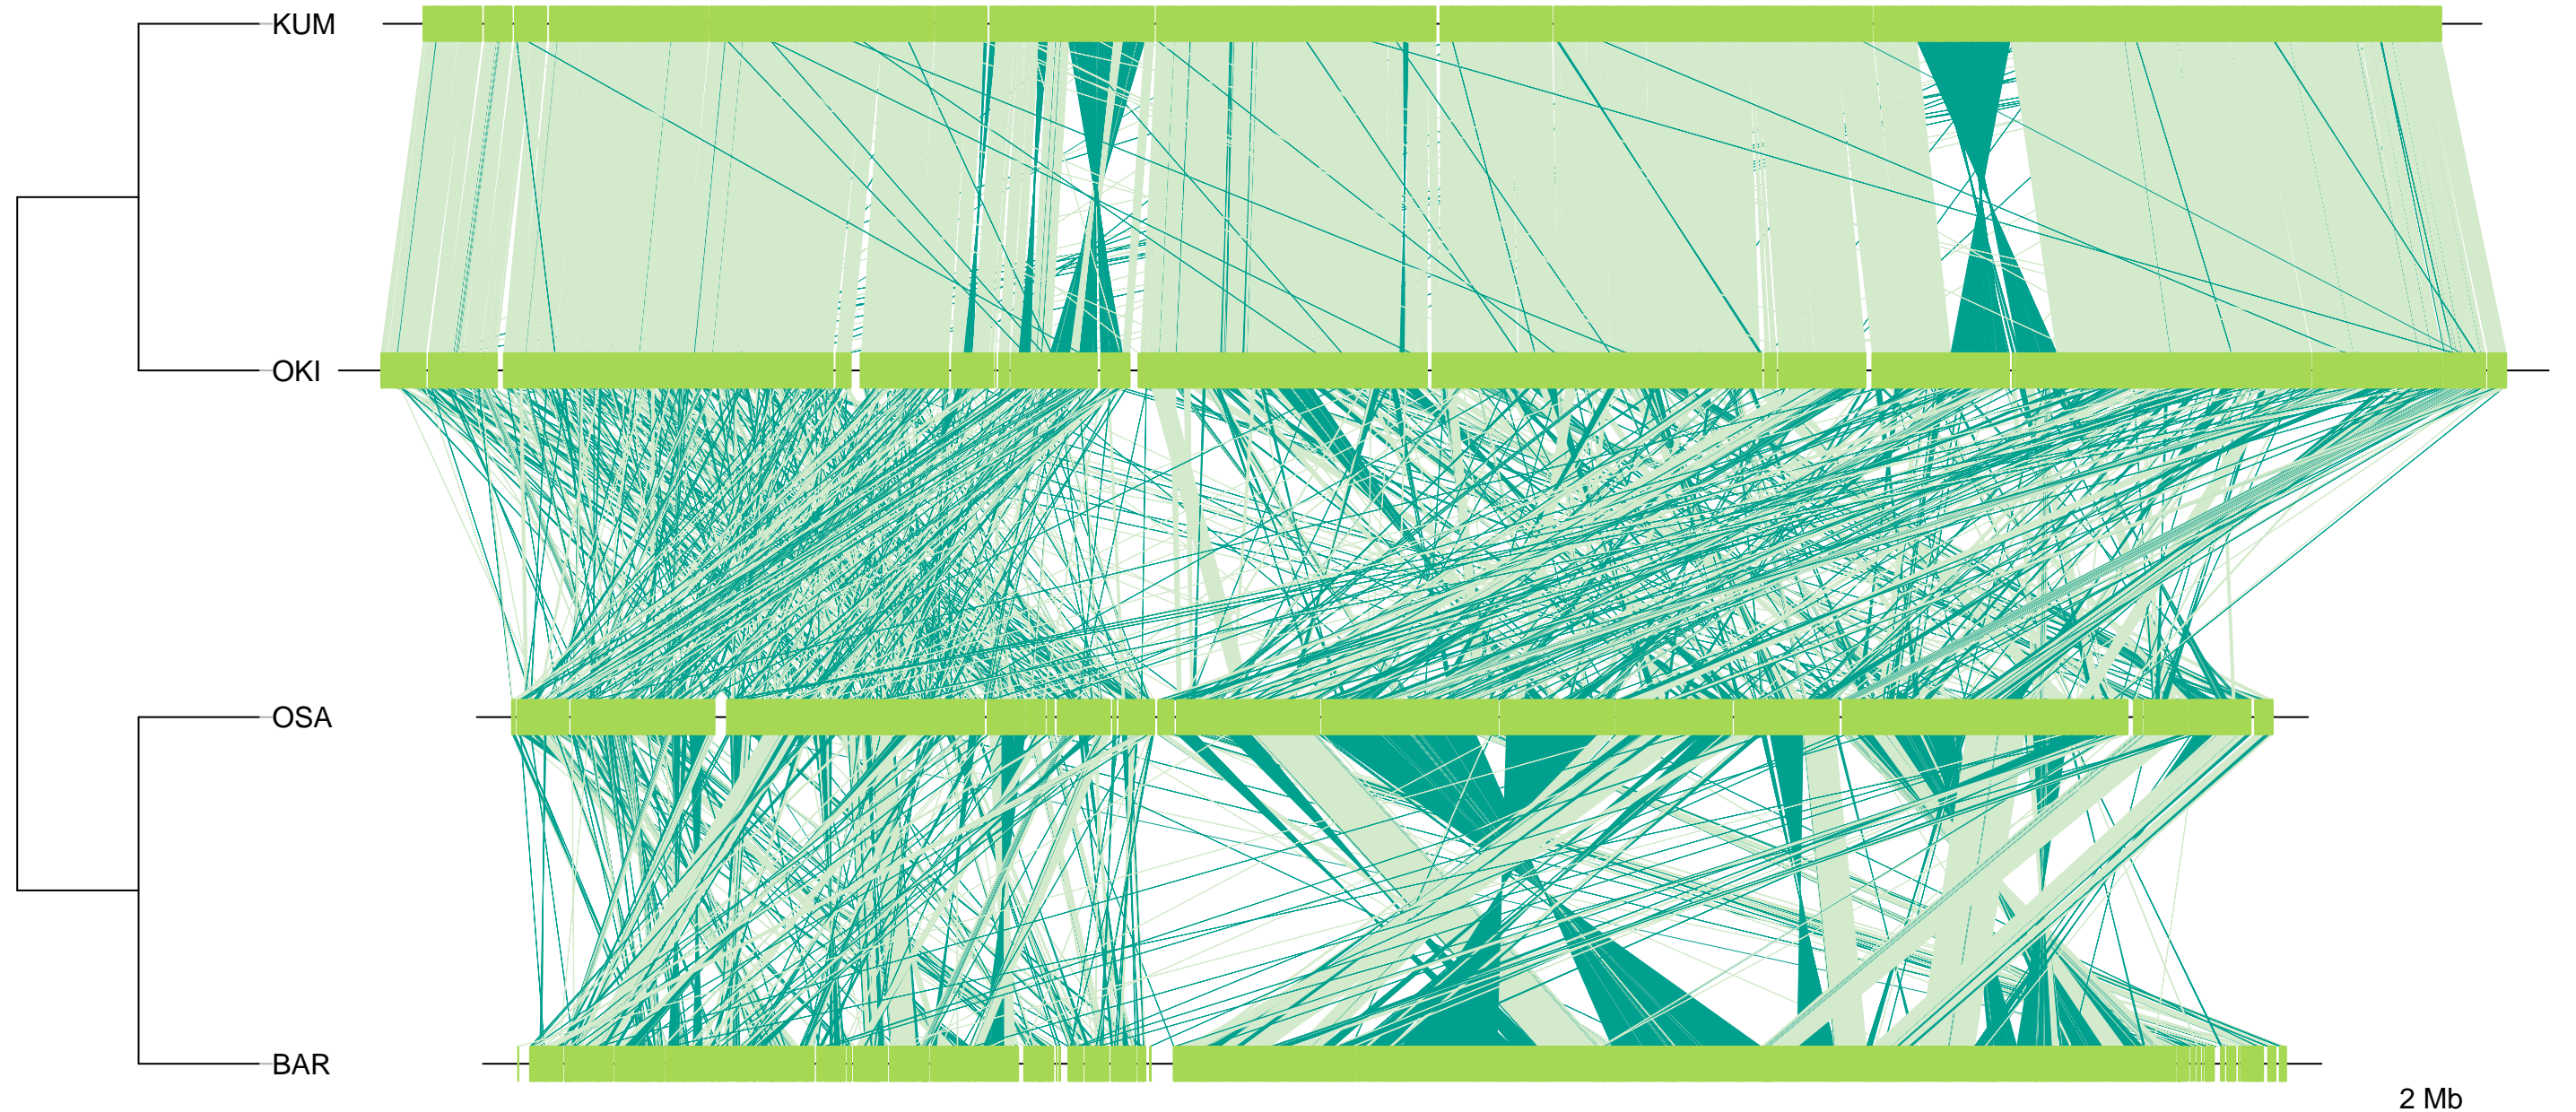

Supplement: Supplemental_Data.zip [file plot_intersect_GBs_with_tree_with_Kume-1.pdf › Supplemental_Data/articles/ParallelPlots_files/figure-html/plot_intersect_GBs_with_tree_with_Kume-1.pdf]

# Chromosome 2 in five *Oikopleura* genome assemblies

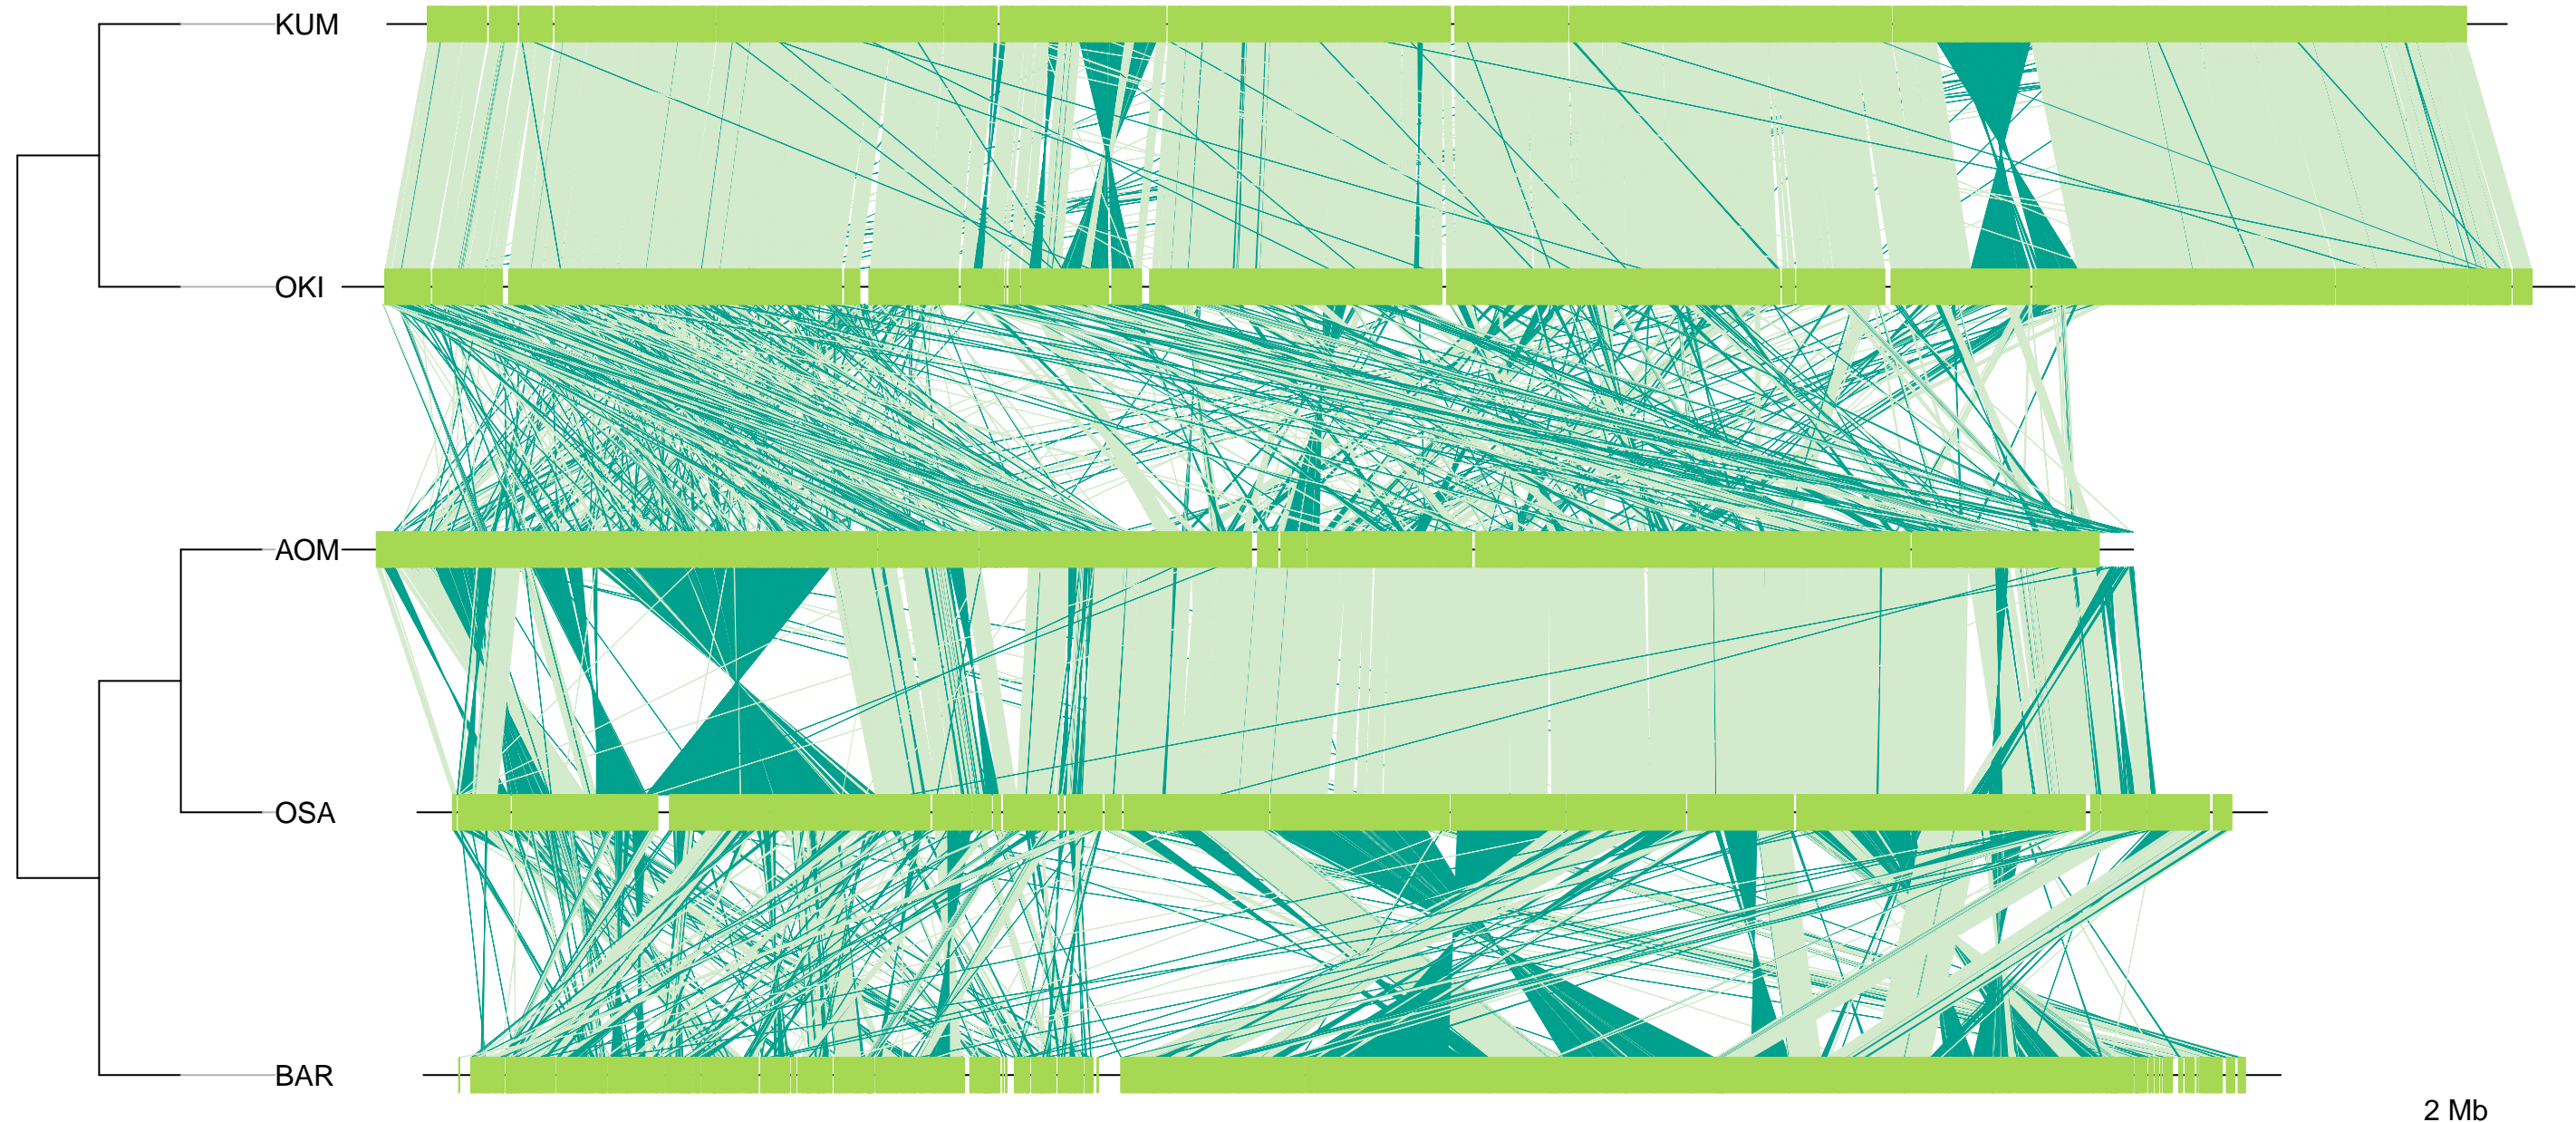

Supplement: Supplemental_Data.zip [file plot_intersect_GBs_with_tree_with_Kume_and_aom-1.pdf › Supplemental_Data/articles/ParallelPlots_files/figure-html/plot_intersect_GBs_with_tree_with_Kume_and_aom-1.pdf]

# Chromosome 2 in six *Oikopleura* genome assemblies

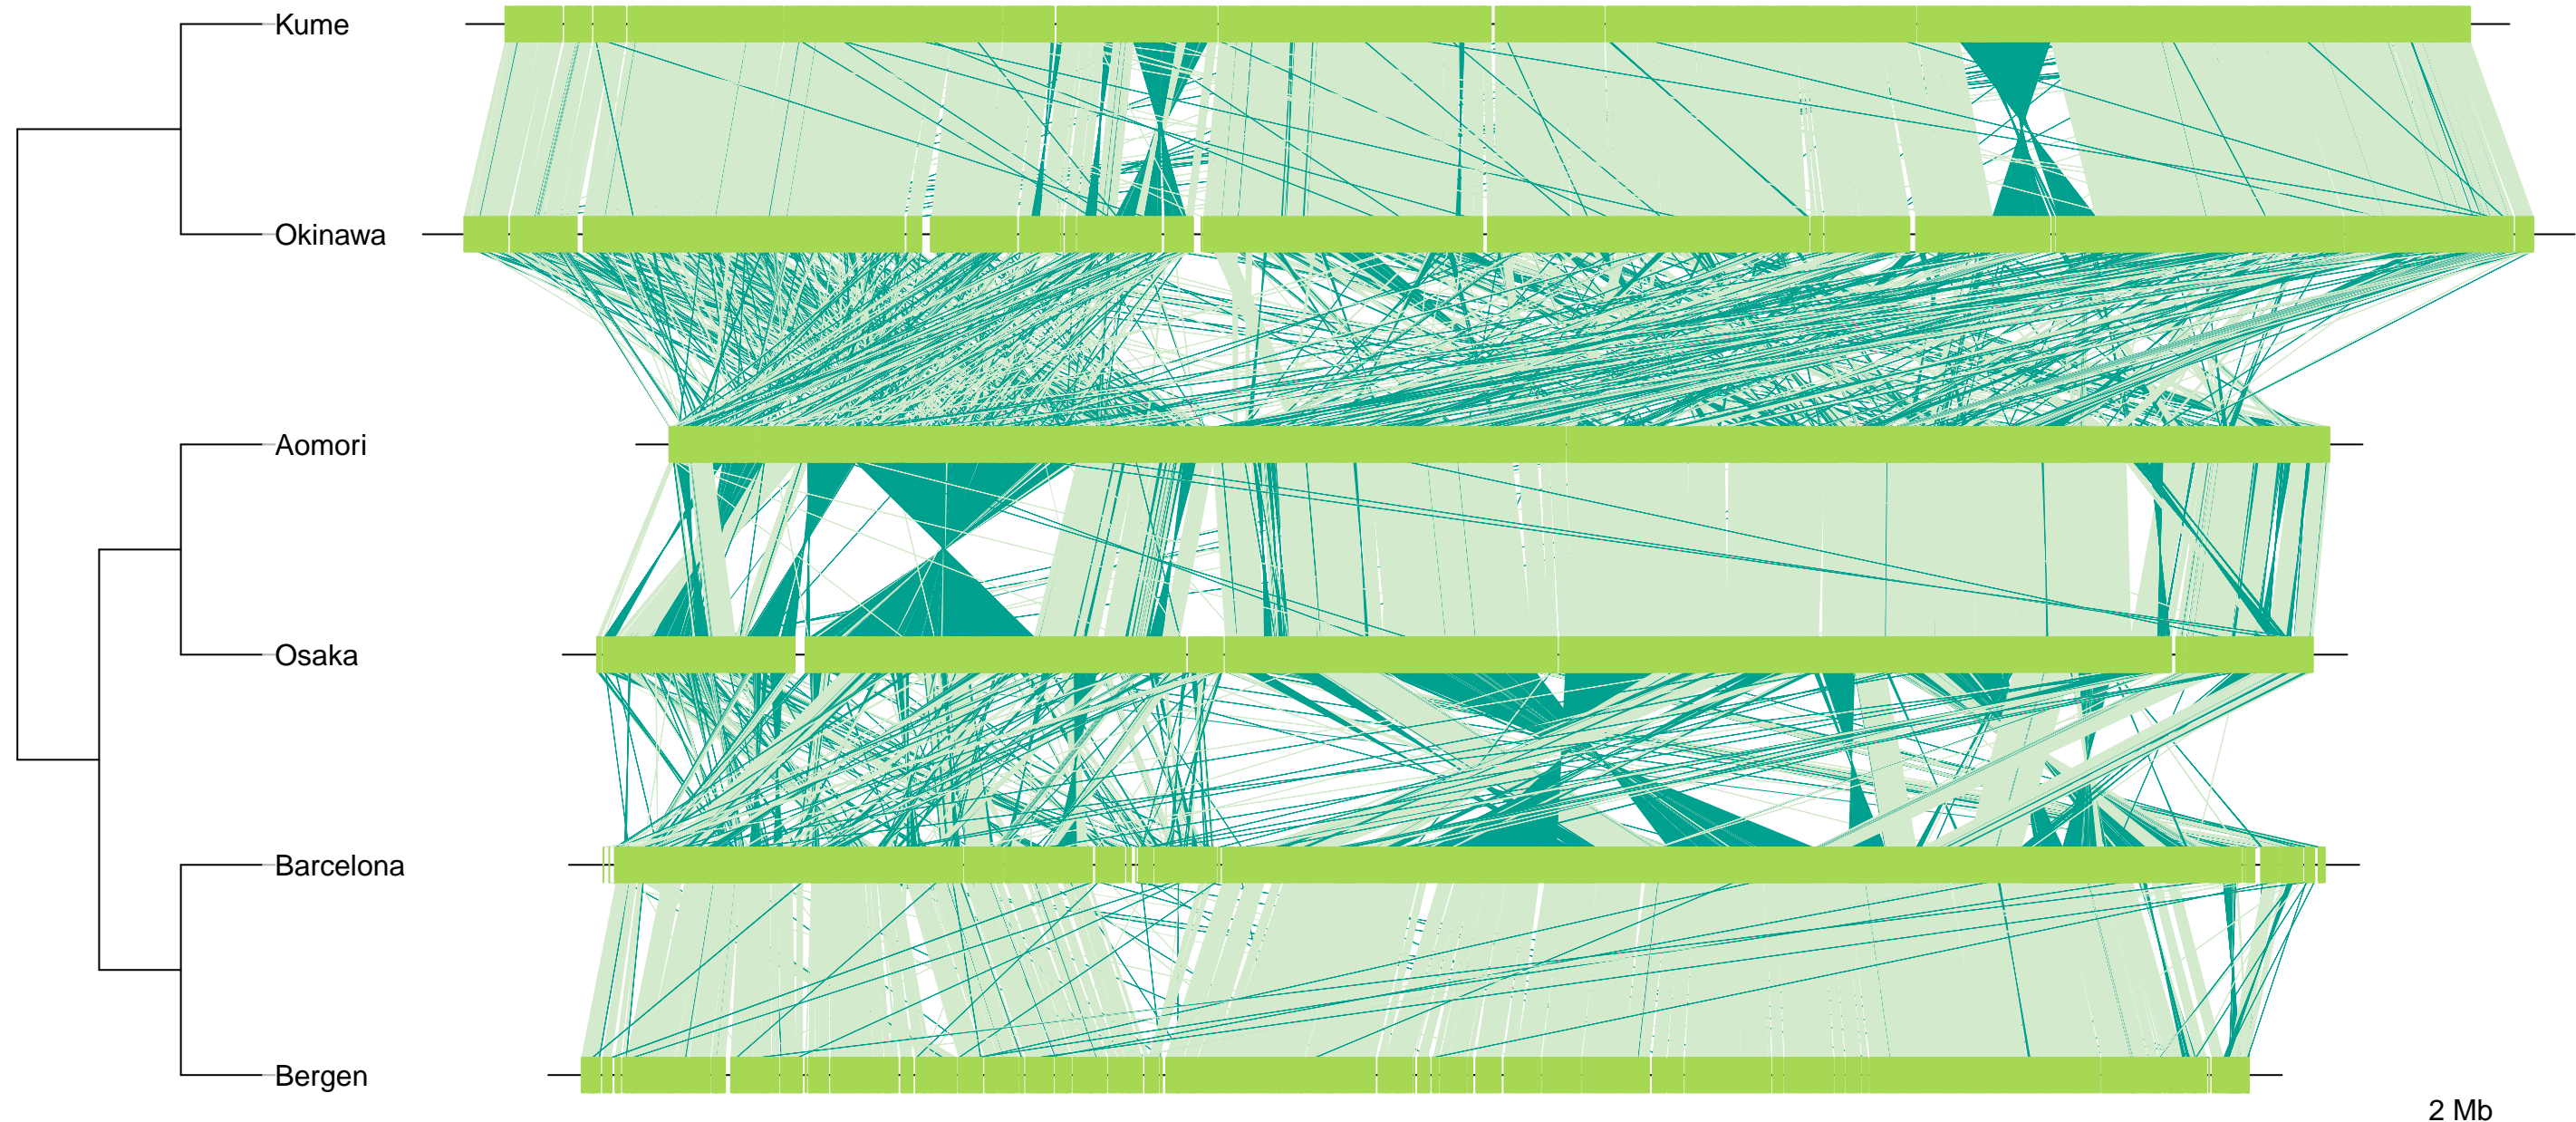

Supplement: Supplemental_Data.zip [file six_genome_parallel_plot-1.pdf › Supplemental_Data/articles/ParallelPlots_files/figure-html/six_genome_parallel_plot-1.pdf]

Number of breakpoints

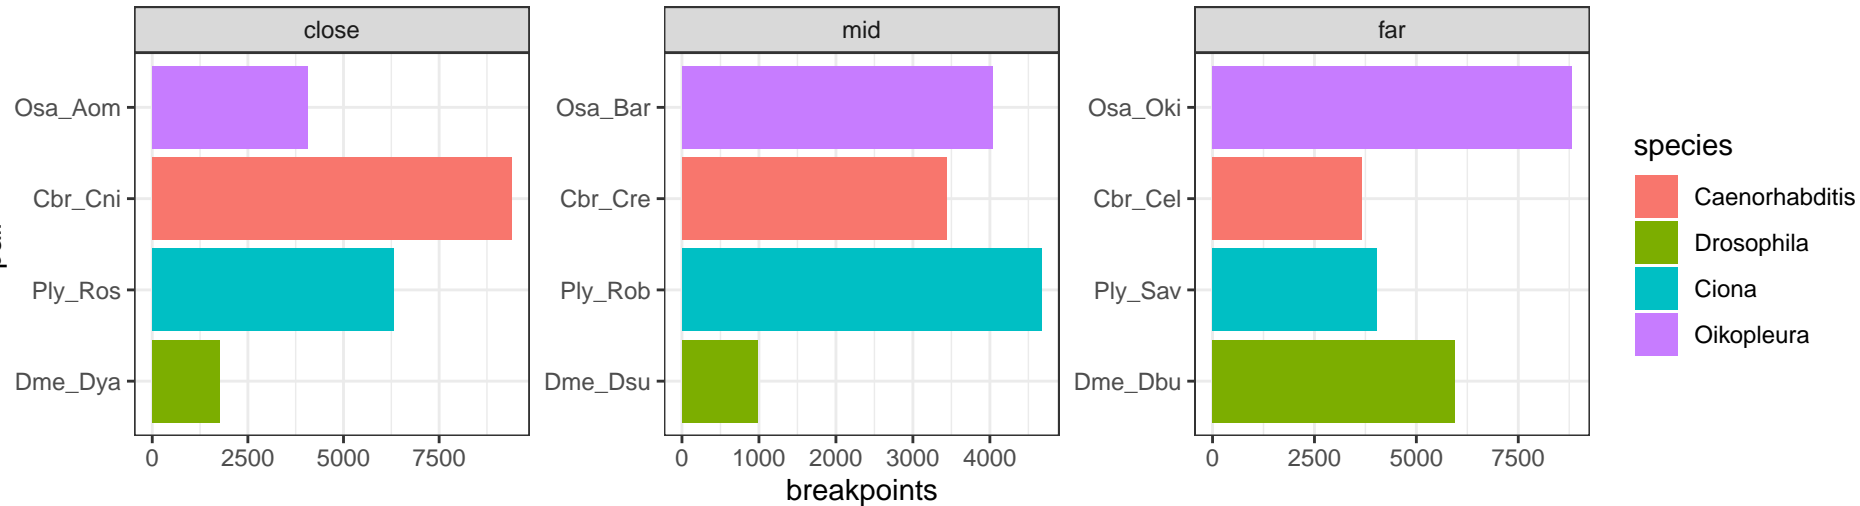

Supplement: Supplemental_Data.zip [file breakpoints_2-1.pdf › Supplemental_Data/articles/ScalingBreakpoints_files/figure-html/breakpoints_2-1.pdf]

Number of breakpoints per megabase aligned per substitution distance

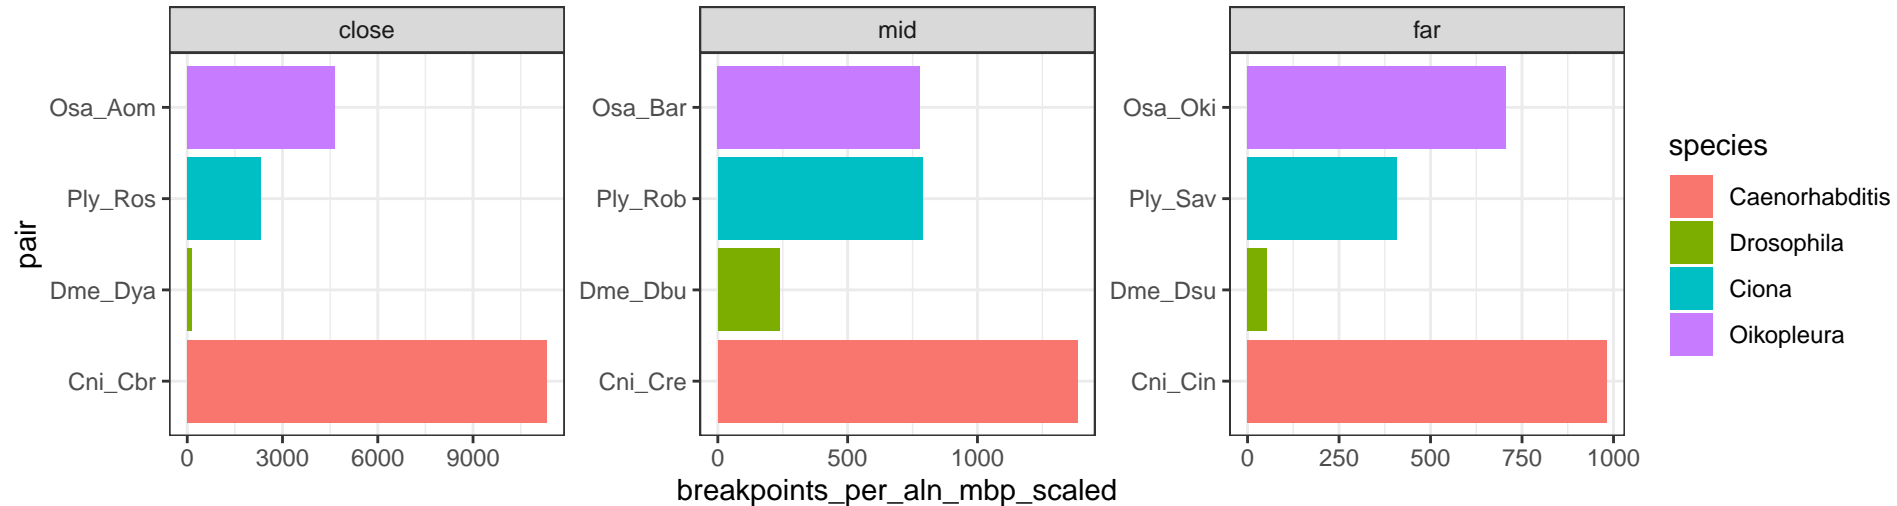

Supplement: Supplemental_Data.zip [file breakpoints_2-10.pdf › Supplemental_Data/articles/ScalingBreakpoints_files/figure-html/breakpoints_2-10.pdf]

Number of breakpoints per million years

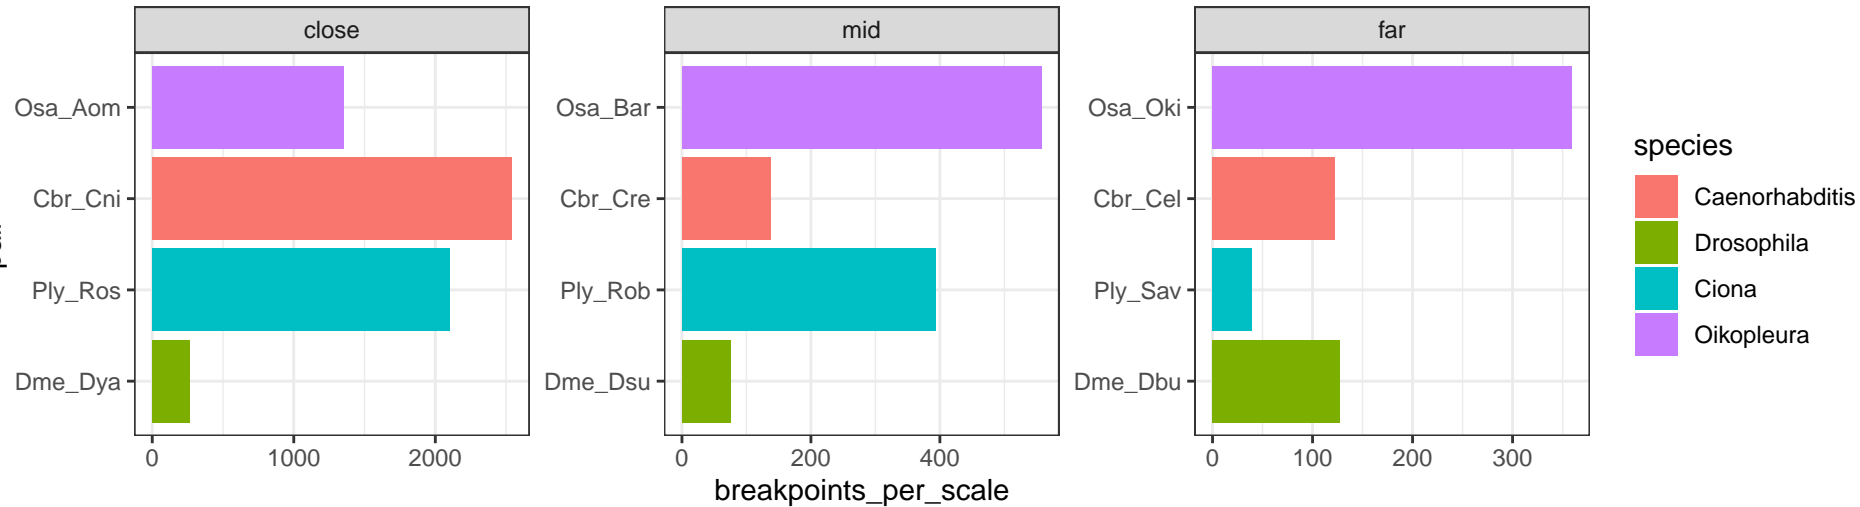

Supplement: Supplemental_Data.zip [file breakpoints_2-2.pdf › Supplemental_Data/articles/ScalingBreakpoints_files/figure-html/breakpoints_2-2.pdf]

Number of breakpoints per megabase

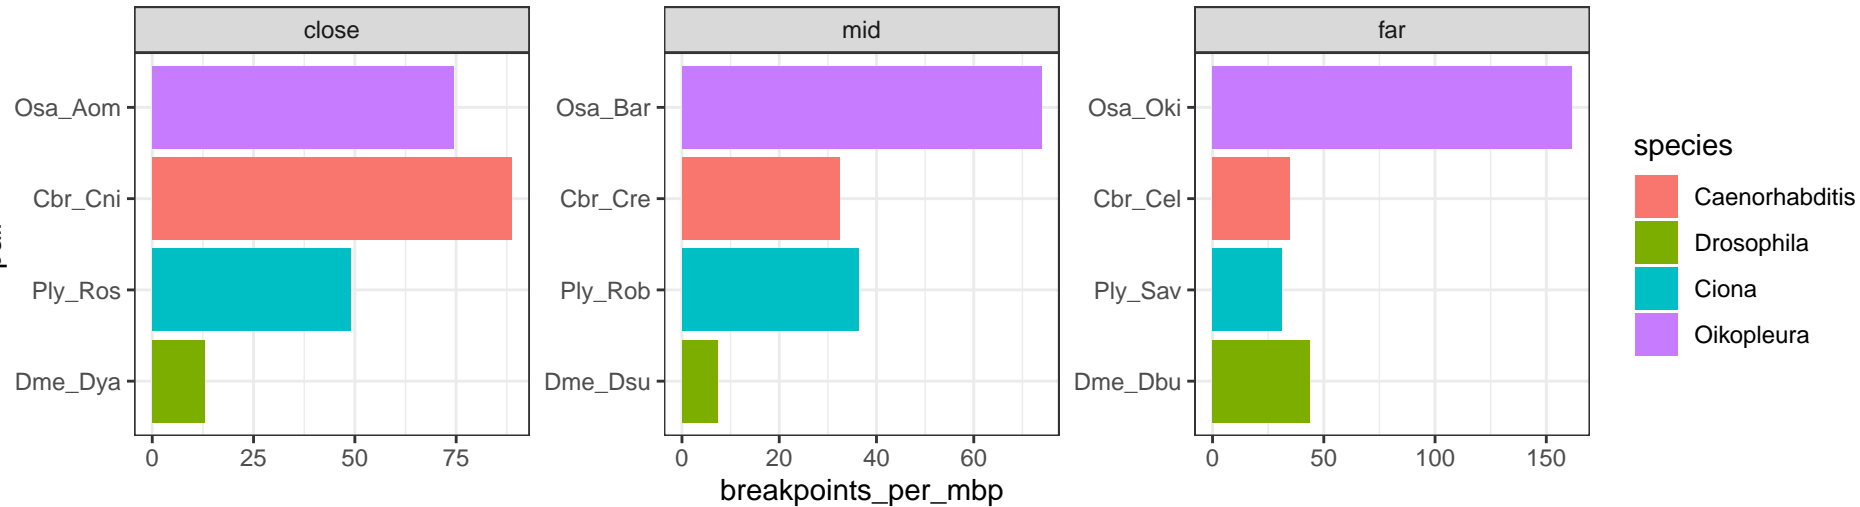

Supplement: Supplemental_Data.zip [file breakpoints_2-3.pdf › Supplemental_Data/articles/ScalingBreakpoints_files/figure-html/breakpoints_2-3.pdf]

Number of breakpoints per megabase aligned

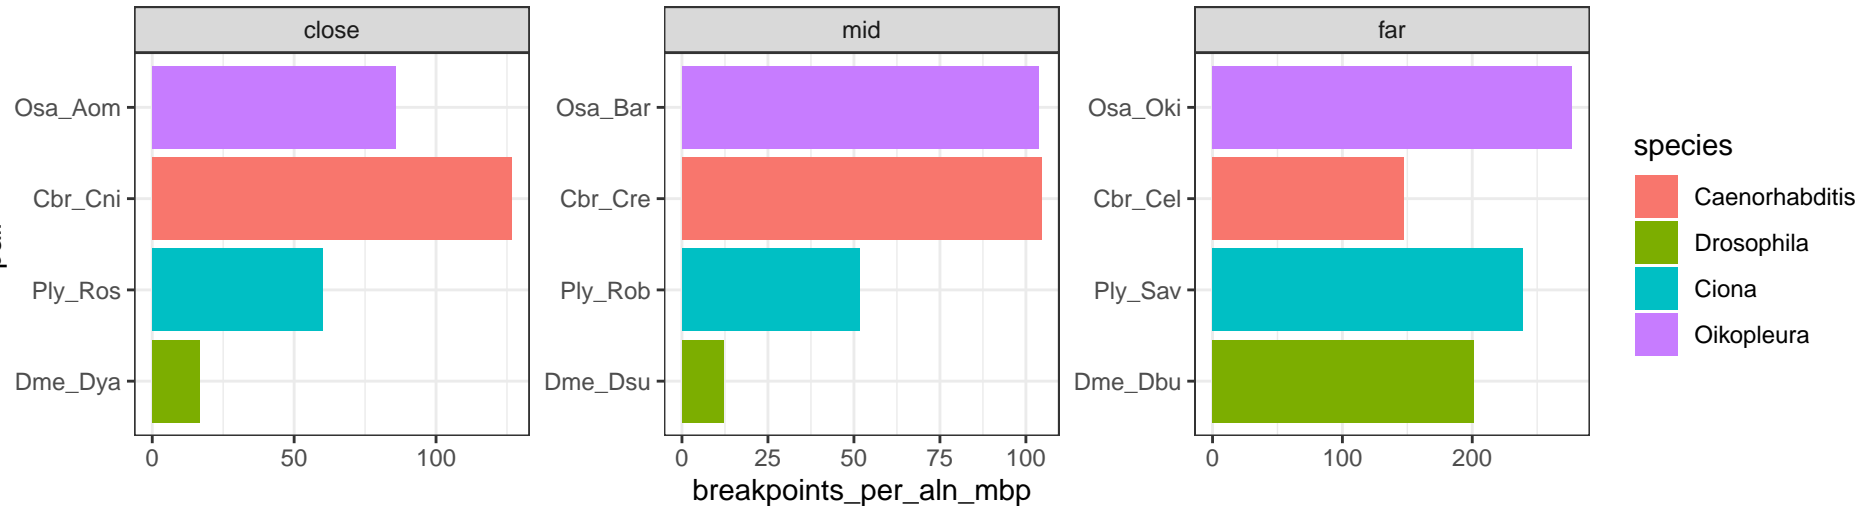

Supplement: Supplemental_Data.zip [file breakpoints_2-4.pdf › Supplemental_Data/articles/ScalingBreakpoints_files/figure-html/breakpoints_2-4.pdf]

# Number of breakpoints per megabase per million years diverged

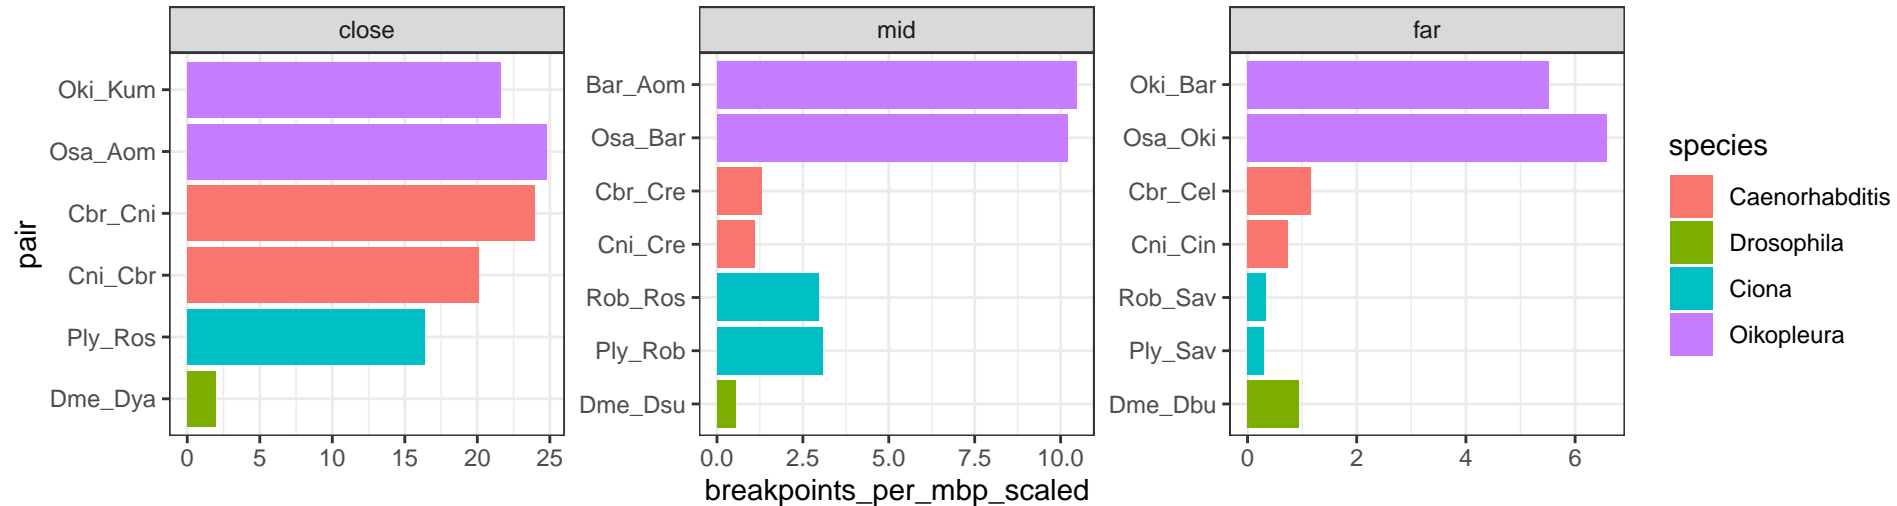

Supplement: Supplemental_Data.zip [file breakpoints_2-5.pdf › Supplemental_Data/articles/ScalingBreakpoints_files/figure-html/breakpoints_2-5.pdf]

Number of breakpoints per megabase aligned per million years diverged

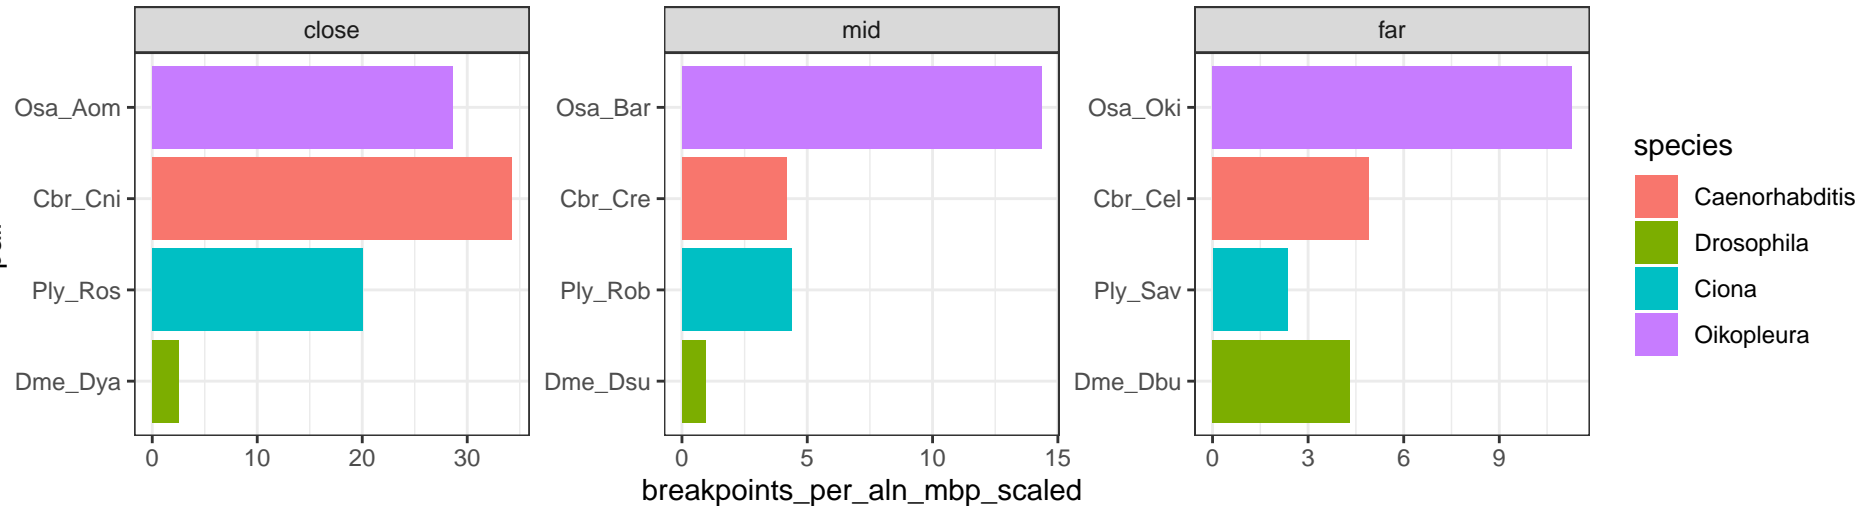

Supplement: Supplemental_Data.zip [file breakpoints_2-6.pdf › Supplemental_Data/articles/ScalingBreakpoints_files/figure-html/breakpoints_2-6.pdf]

Number of breakpoints per megabase aligned per million years diverged

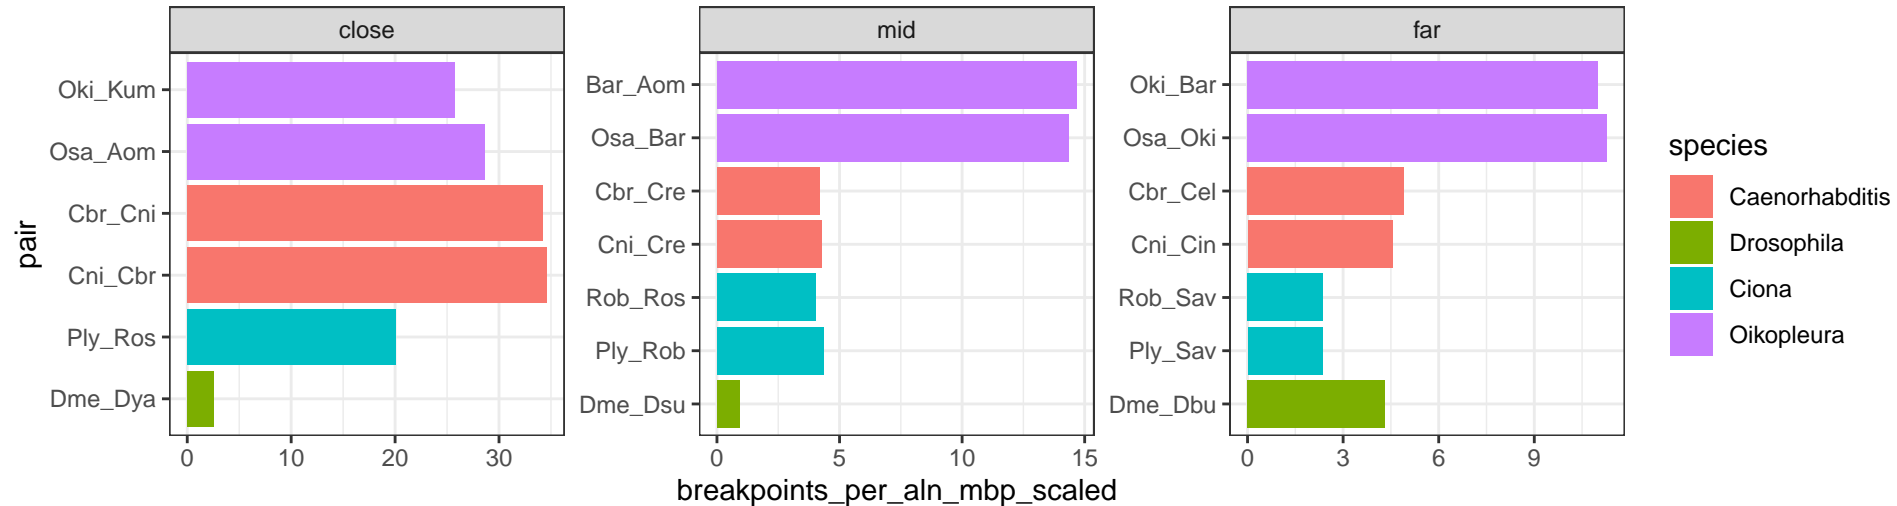

Supplement: Supplemental_Data.zip [file breakpoints_2-7.pdf › Supplemental_Data/articles/ScalingBreakpoints_files/figure-html/breakpoints_2-7.pdf]

Number of breakpoints per megabase per substitution distance

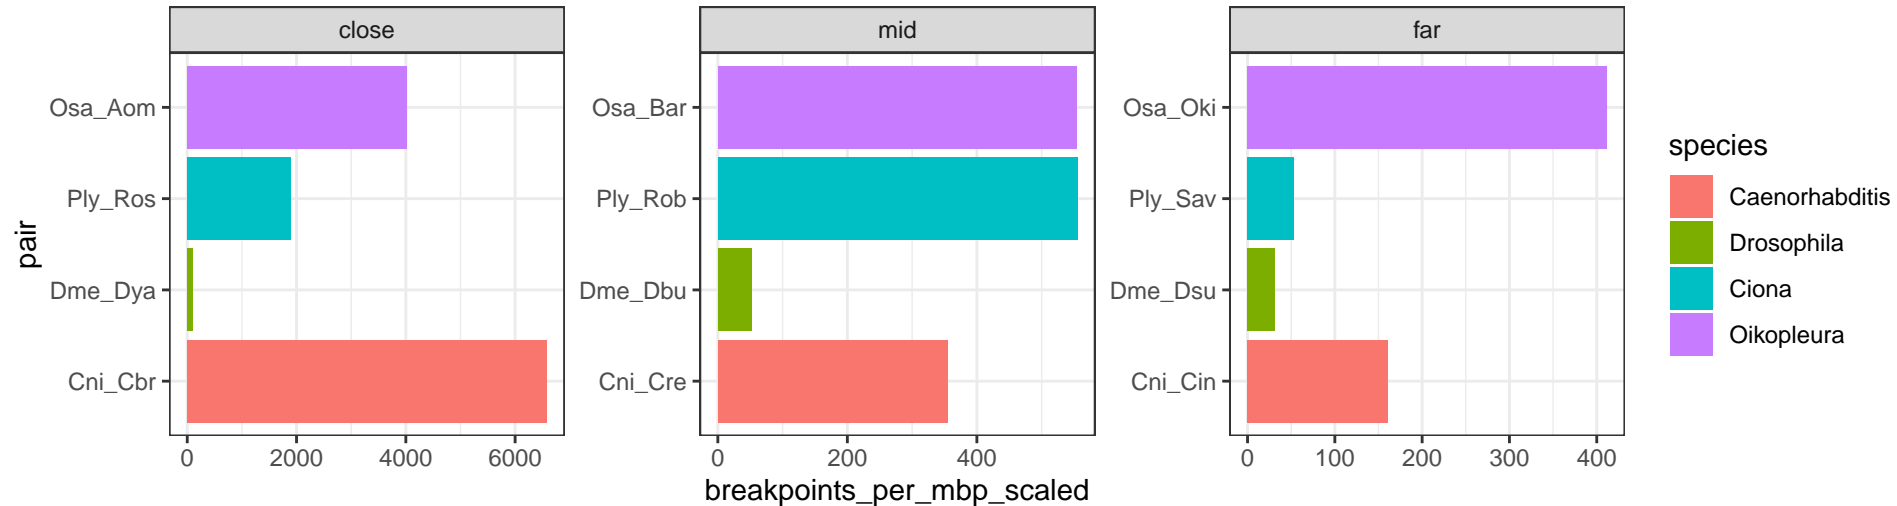

Supplement: Supplemental_Data.zip [file breakpoints_2-8.pdf › Supplemental_Data/articles/ScalingBreakpoints_files/figure-html/breakpoints_2-8.pdf]

Number of breakpoints per megabase aligned per substitution distance



Supplement: Supplemental_Data.zip [file breakpoints_2-9.pdf › Supplemental_Data/articles/ScalingBreakpoints_files/figure-html/breakpoints_2-9.pdf]

Number of breakpoints per megabase per million years diverged

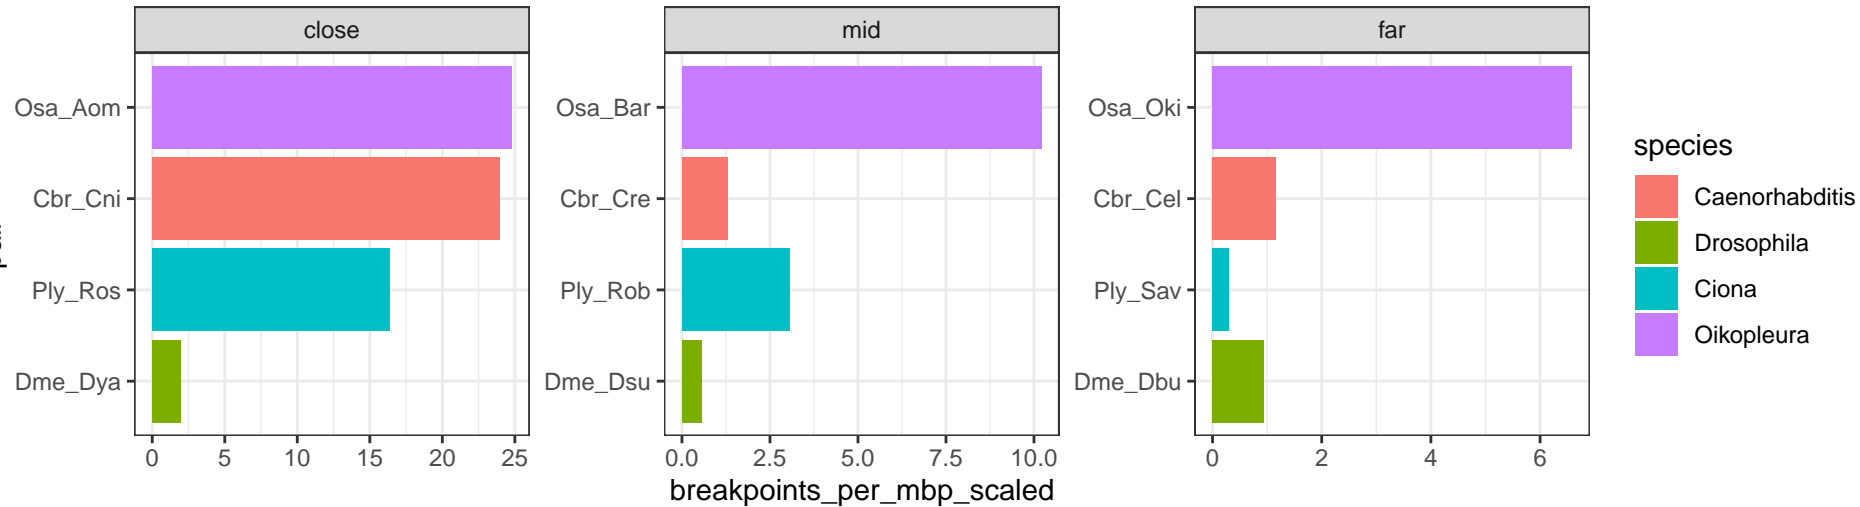

Supplement: Supplemental_Data.zip [file breakpoints_main_figure-1.pdf › Supplemental_Data/articles/ScalingBreakpoints_files/figure-html/breakpoints_main_figure-1.pdf]

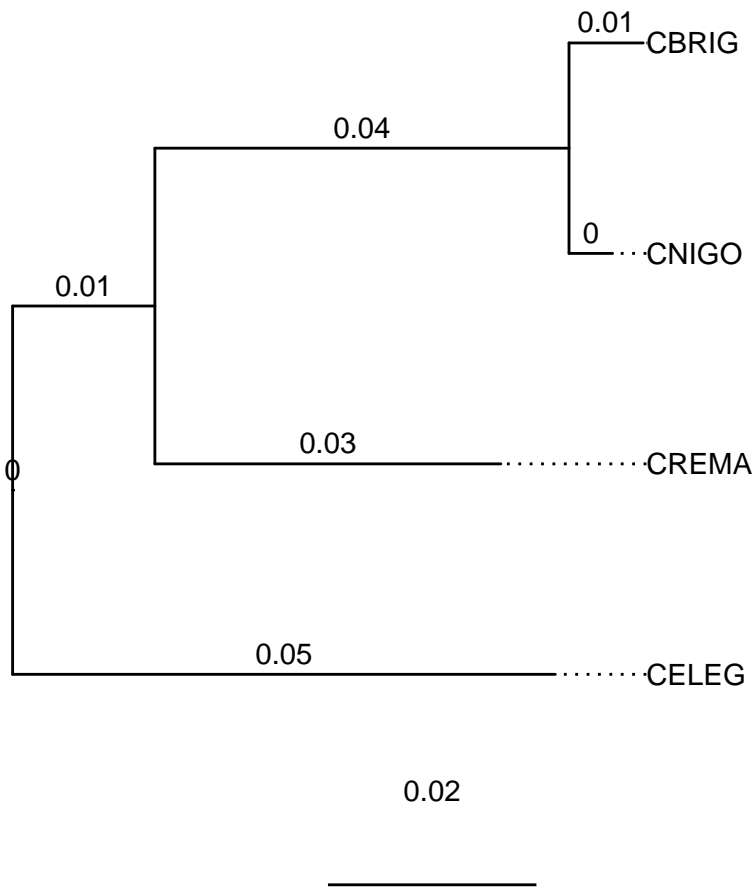

Supplement: Supplemental_Data.zip [file species_trees_Caeno4-1.pdf › Supplemental_Data/articles/ScalingBreakpoints_files/figure-html/species_trees_Caeno4-1.pdf]

Caenorhabditis briggsae vs C. elegans (23% aligned, 72% identity)

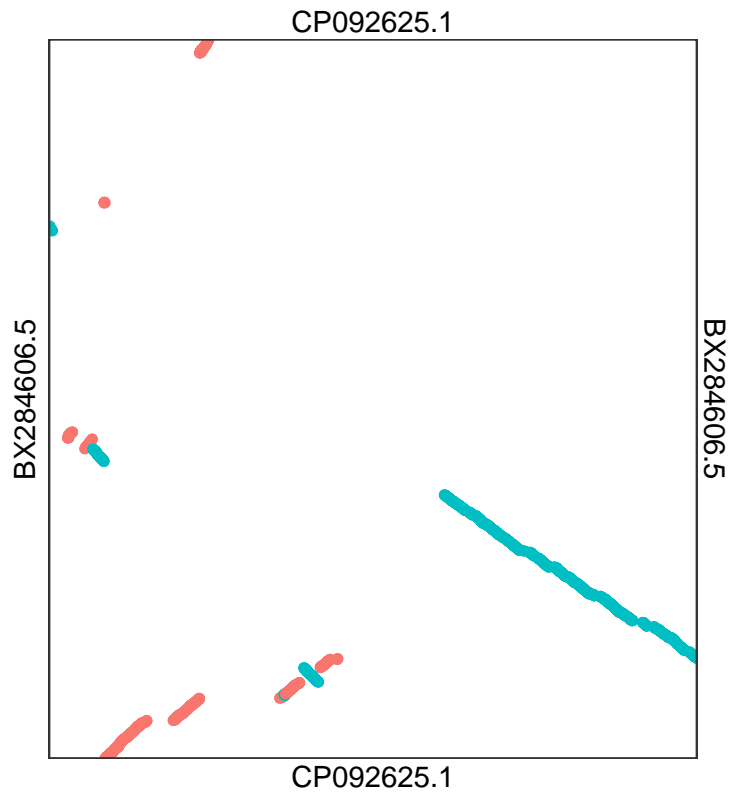

Supplement: Supplemental_Data.zip [file Cbr_Cel_win-1.pdf › Supplemental_Data/articles/SquareWindowPlots_files/figure-html/Cbr_Cel_win-1.pdf]

# Caenorhabditis briggsae vs C. nigoni (69% aligned, 85% iden

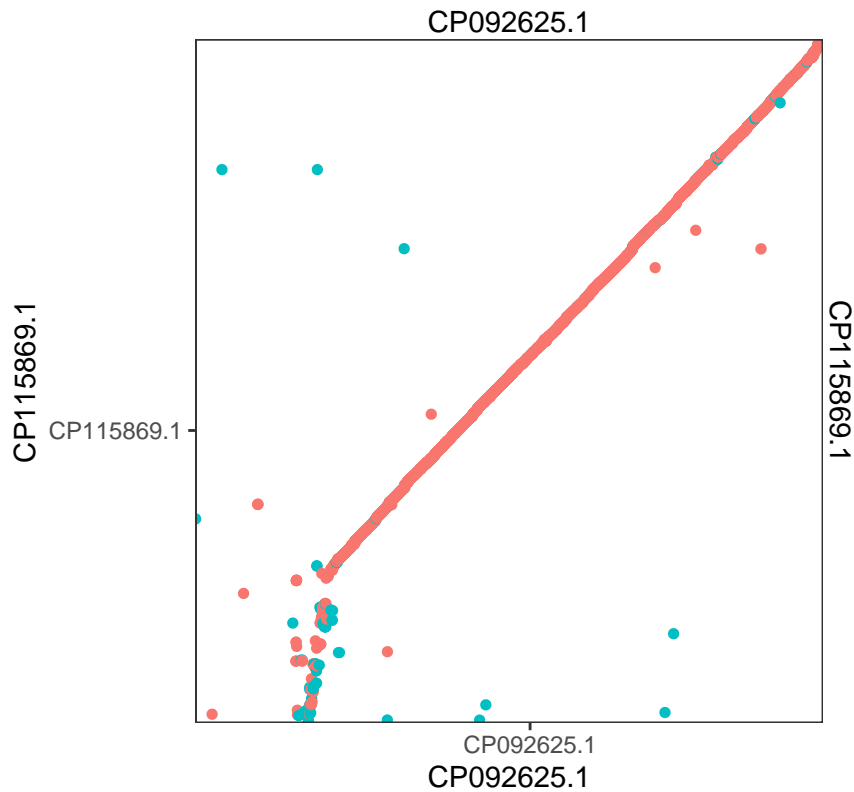

Supplement: Supplemental_Data.zip [file Cbr_Cni_win-1.pdf › Supplemental_Data/articles/SquareWindowPlots_files/figure-html/Cbr_Cni_win-1.pdf]

Caenorhabditis briggsae vs C. remanei (30% aligned, 72% iden

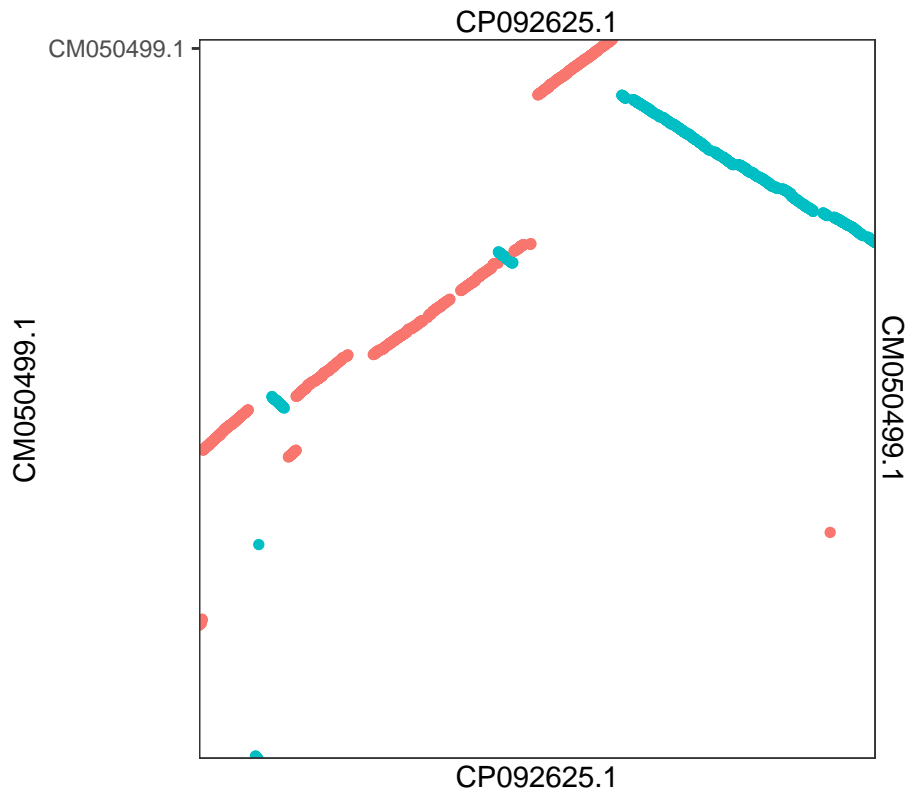

Supplement: Supplemental_Data.zip [file Cbr_Cre_win-1.pdf › Supplemental_Data/articles/SquareWindowPlots_files/figure-html/Cbr_Cre_win-1.pdf]

OKI2018.I69 vs OSKA2016v1.9 macrosynteny plot

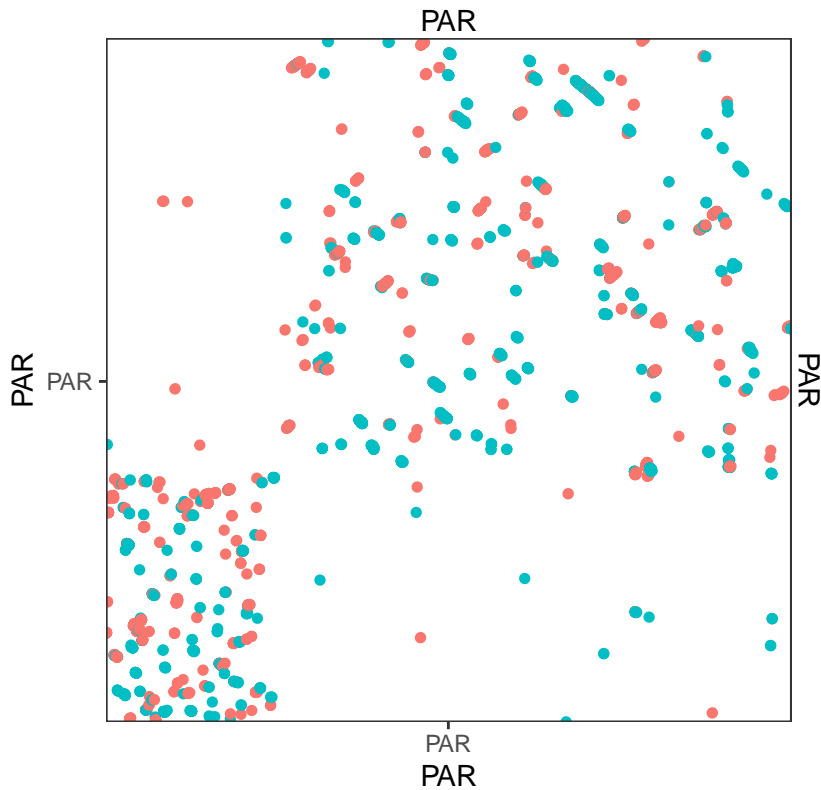

Supplement: Supplemental_Data.zip [file Oki_Osa_win-1.pdf › Supplemental_Data/articles/SquareWindowPlots_files/figure-html/Oki_Osa_win-1.pdf]

OSKA2016v1.9 vs AOM.5.5f macrosynteny plot

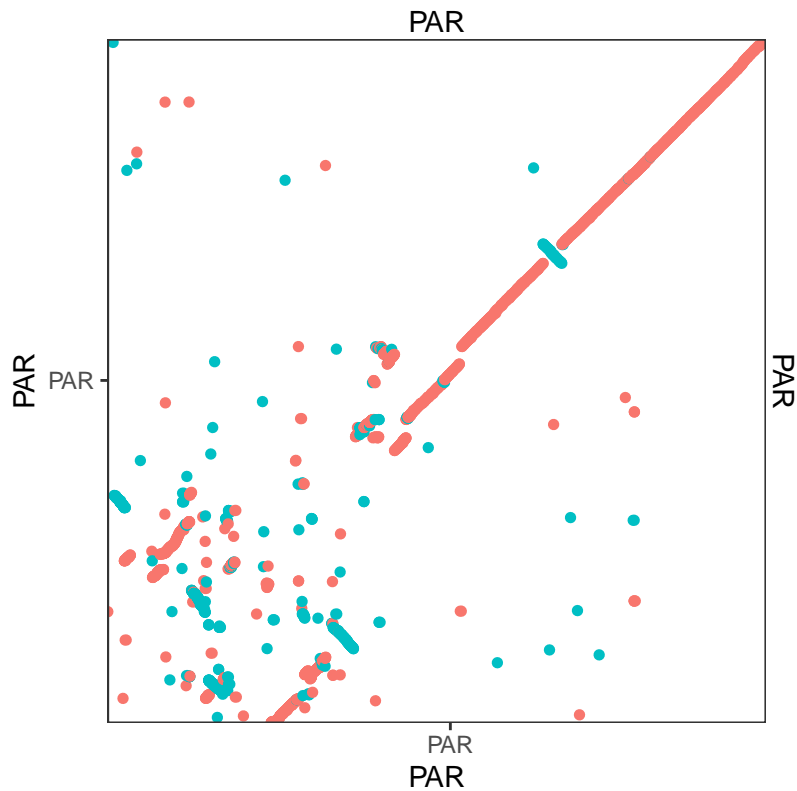

Supplement: Supplemental_Data.zip [file Osa_Aom_win-1.pdf › Supplemental_Data/articles/SquareWindowPlots_files/figure-html/Osa_Aom_win-1.pdf]

OSKA2016v1.9 vs OKI2018.I69 macrosynteny plot

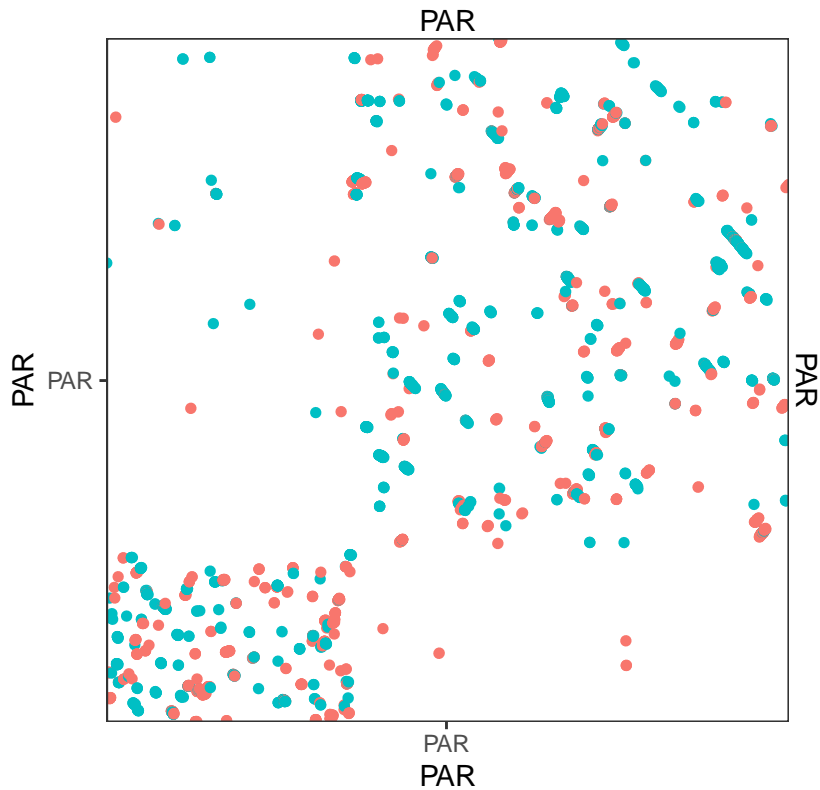

Supplement: Supplemental_Data.zip [file Osa_Oki_win-1.pdf › Supplemental_Data/articles/SquareWindowPlots_files/figure-html/Osa_Oki_win-1.pdf]
